# Supplementary material for: Urine Metabolite Profiles after the Consumption of a Low- and a High-Digestible Protein Meal, and Comparison of Urine Normalization Techniques
Source: MDPI journal article supplement (doi:10.3390/metabo14040177), 2024-03-22
Supplement: s1 [file s1]

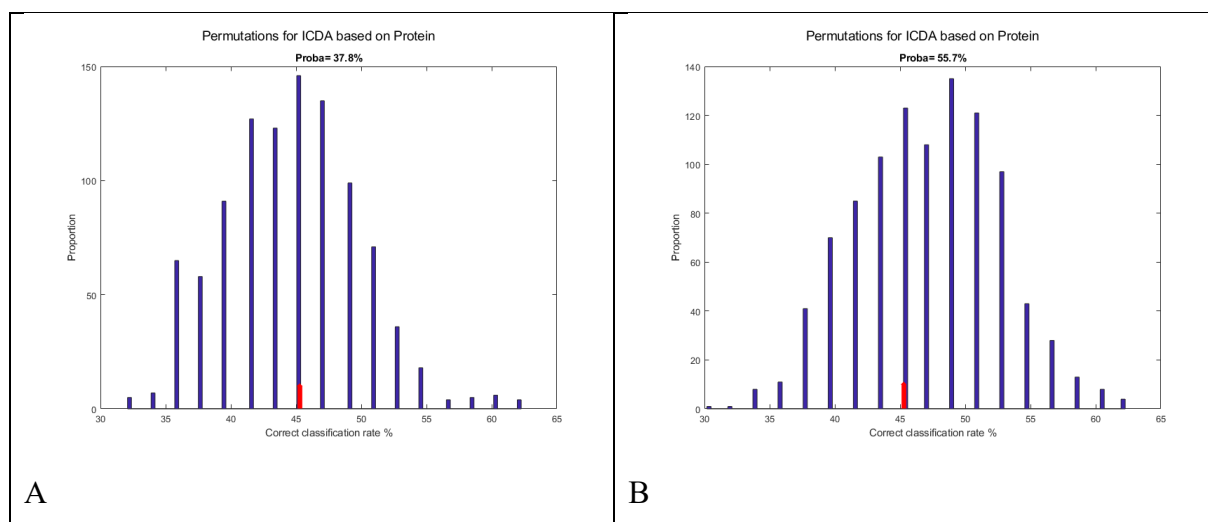

Figure S1: Proportion of correct classification for IC-DA permutation test on untreated data for Protein groups : A) Osmolality-corrected Reverse Phase; B) Osmolality-corrected HILIC; Legend: Blue bars, permuted groups; Red bar, true groups.

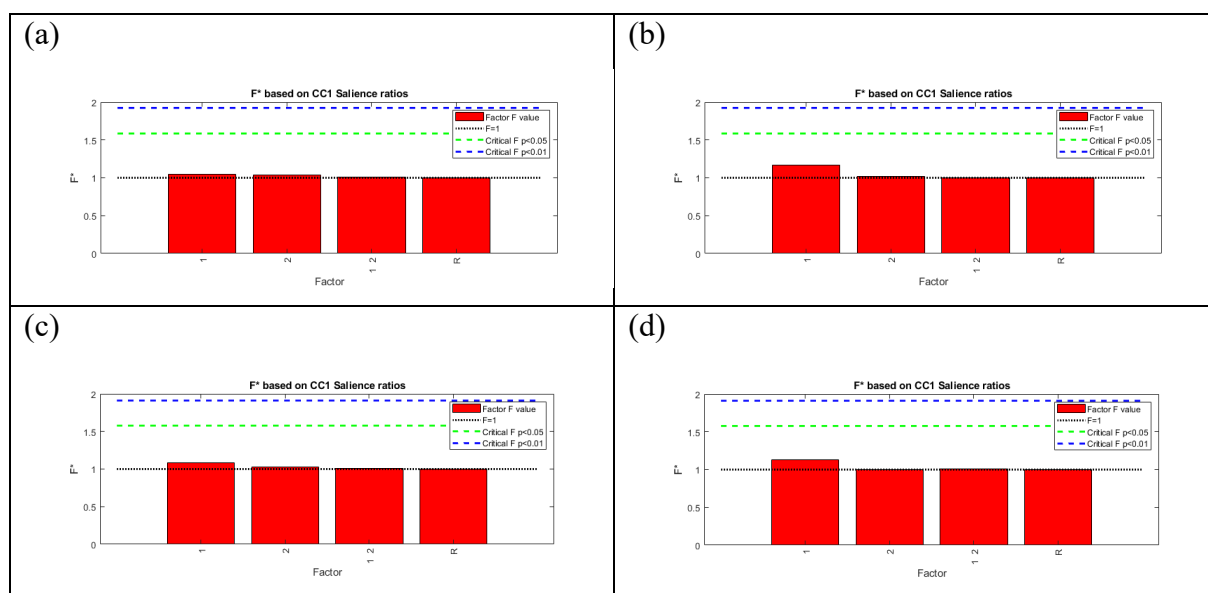

Figure S2. F-values calculated as the ratio of the salience of the residual table for CC 1 on the saliences of the other tables. (a) Osmolality-corrected, SNV-pretreated RP data; (b) Osmolality-corrected, SNV-pretreated HILIC data, (c) non-corrected, raw RP data; (d) non-corrected, raw HILIC data. Note that the F\* value is slightly higher for the non-corrected, raw RP data.

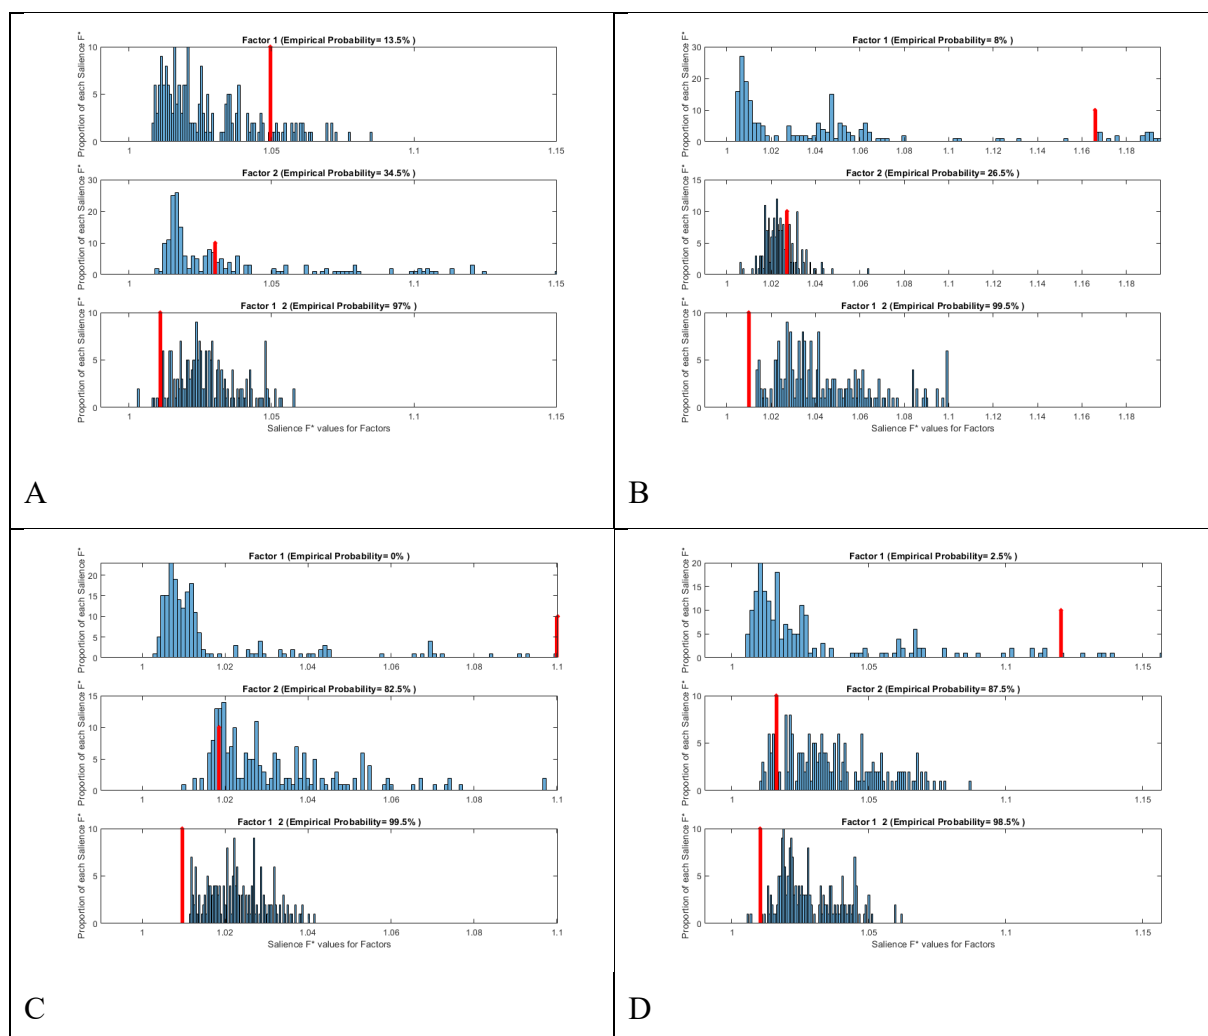

Figure S3: Proportion of correct classification for AComDim-ICA permutation test on the data for Period groups for the original (Red) and the permuted (Blue) groups, for the 3 Factors : A) SNV-treated osmolality-corrected Reverse Phase; B) SNV-treated osmolality-corrected HILIC, C) raw, non-corrected Reverse Phase; D) raw, non-corrected HILIC.

In Figure S3 it is clear that the Factor1 effect is more significant for the HILIC data than for the RP data. In no case are Factor2 and Factor12 significant.





Table S2. MS-MS characteristics of urinary metabolites related to the consumption of experimental meal. For some features no MS-MS fragmentation could be obtained due to the low intensity of the ion in the spectrum.

| Experim. m/z | Suggested ion       | Elemental composition                                           | MS/MS fragment ions                            | Collision energy, eV | annotation            |
|--------------|---------------------|-----------------------------------------------------------------|------------------------------------------------|----------------------|-----------------------|
| 338.3422     | --                  | C <sub>12</sub> H <sub>44</sub> NO                              | No MS-MS fragments obtained                    | --                   | unknown               |
| 114.067      | [M+H] <sup>+</sup>  | C <sub>4</sub> H <sub>8</sub> N <sub>3</sub> O                  | 86.0848                                        | 30                   | creatinine            |
| 312.2176     | [M+H] <sup>+</sup>  | C <sub>17</sub> H <sub>30</sub> N <sub>4</sub> O <sub>4</sub>   | 253.1445, 151.1120, 123.1162, 85.0289, 81.0703 | 20                   | decanoylcarnitine     |
| 287.1008     | [M+Na] <sup>+</sup> | C <sub>13</sub> H <sub>17</sub> N <sub>2</sub> O <sub>4</sub>   | 136.0765, 130.0506, 91.0537, 84.0446           | 15                   | phenylacetylglutamine |
| 229.1553     | [M+H] <sup>+</sup>  | C <sub>11</sub> H <sub>21</sub> N <sub>2</sub> O <sub>3</sub>   | 142.0866, 70.0654                              | 20                   | unknown               |
| 162.1135     | [M+H] <sup>+</sup>  | C <sub>7</sub> H <sub>16</sub> N <sub>3</sub> O                 | 102.0919, 103.0324, 85.0233                    | 15                   | Carnitine             |
| 229.1189     | [M+H] <sup>+</sup>  | C <sub>10</sub> H <sub>17</sub> N <sub>2</sub> O <sub>4</sub>   | 132.0658, 86.0606                              | 20                   | Hydroxyprolyl-proline |
| 350.0853     | --                  | --                                                              | No MS-MS fragments obtained                    | --                   | unknown               |
| 333.1165     | --                  | --                                                              | No MS-MS fragments obtained                    | --                   | unknown               |
| 377.1428     | --                  | C <sub>10</sub> H <sub>26</sub> N <sub>4</sub> O <sub>9</sub> P | No MS-MS fragments obtained                    | --                   | unknown               |

|          |                    |                         |                                                              |    |                                |
|----------|--------------------|-------------------------|--------------------------------------------------------------|----|--------------------------------|
| 160.09   | [M+H] <sup>+</sup> | C7H13NO3                | 142.0860, 100.0760                                           |    | Dehydrocarnitine               |
| 421.1682 | [M+H] <sup>+</sup> | C14H25N6O9<br>C7H13N3O5 | 363.1629, 305.1567                                           | 25 | unknown                        |
| 416.2134 | --                 | C17H29N5O7              | No MS-MS fragments<br>obtained                               |    | unknown                        |
| 289.0901 | --                 | --                      | No MS-MS fragments<br>obtained                               |    | unknown                        |
| 170.0931 | [M+H] <sup>+</sup> | C7H12N3O2               | 124.0852, 109.0742,<br>97.1008, 96.0728,<br>95.0658, 83.0575 | 20 | 3-methylhistidine              |
| 137.0718 | [M+H] <sup>+</sup> | C7 H9 N2 O              | 120.0463, 110.0600,<br>94.0656                               | 20 | 6-methylpyridine-3-carboxamide |
| 207.0592 | [M+H] <sup>+</sup> | C4H9N5O5                | 165.0481, 132.0680                                           | 20 | unknown                        |

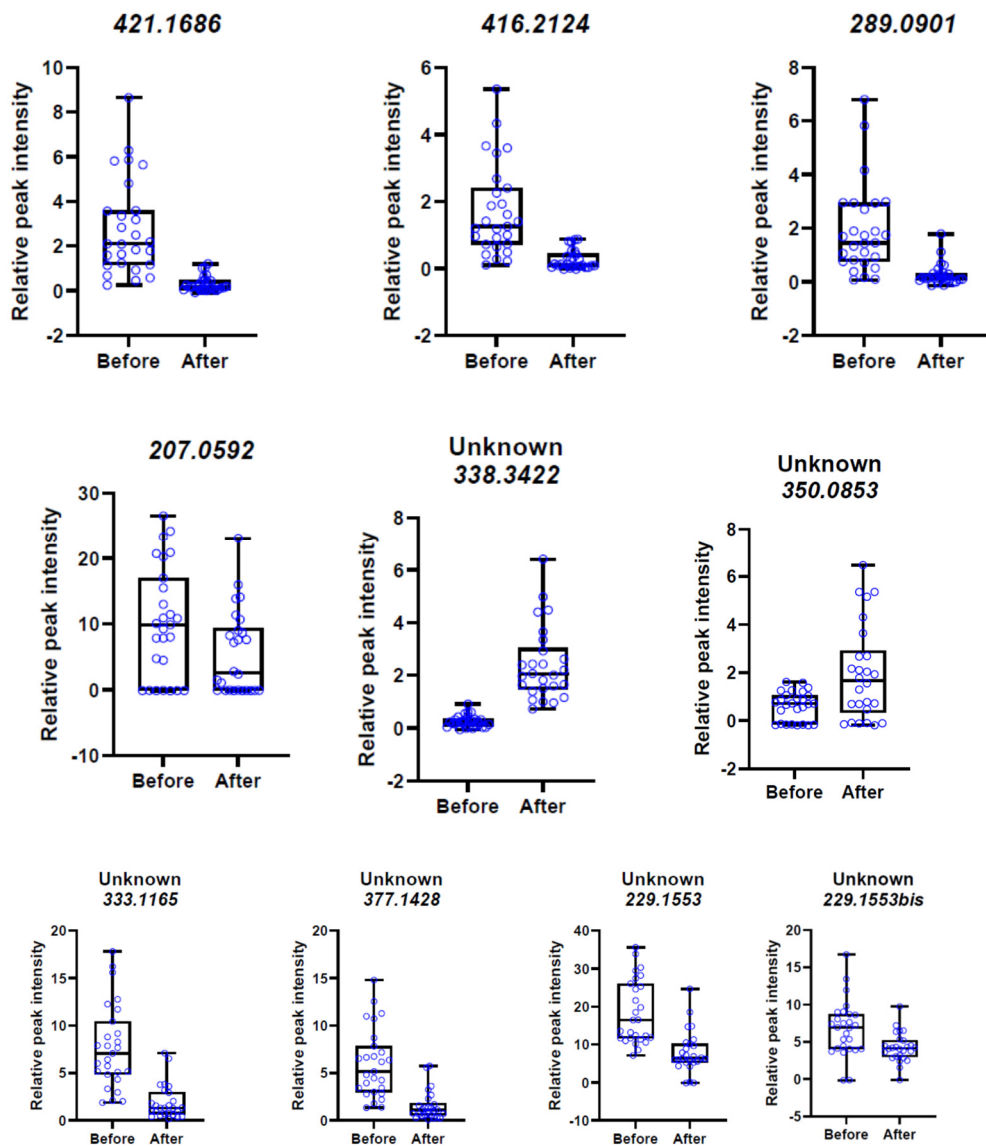

Figure S6. Boxplot of signal intensities of non-identified metabolites before and 9 h after meal intake. Legend: group 1 = before meal intake, group 2 = 9h after meal intake.
