# Supplementary material for: Urine Metabolite Profiles after the Consumption of a Low- and a High-Digestible Protein Meal, and Comparison of Urine Normalization Techniques
Source: Metabolites. 2024 Mar 22;14(4):177. doi: 10.3390/metabo14040177 (PMC11052258; doi:10.3390/metabo14040177)
Supplement: Supplementary file 1 [file metabolites-14-00177-s001.zip › khodorova_Suppl_Table S1.xlsx]

## Sheet: HILIC osmolality
Sample name		08112021 Proteos blanc 1	08112021 Proteos blanc 2	08112021 Proteos blanc 3	08112021 Proteos blanc 4	08112021 Proteos blanc 5	08112021 Proteos blanc 6	08112021 Proteos blanc 7	08112021 Proteos QC osmolarity 1	08112021 Proteos QC osmolarity 2	08112021 Proteos QC osmolarity 3	08112021 Proteos QC osmolarity 4	08112021 Proteos QC osmolarity 5	08112021Proteos QC osmolarity 6	08112021 Proteos 3 U1 osmolarity	08112021 Proteos 4 U1 osmolarity	08112021 Proteos 5 U1 osmolarity	08112021 Proteos 6 U1 osmolarity	08112021 Proteos 7 U1 osmolarity	08112021 Proteos 8 U1 osmolarity	08112021 Proteos 9 U1 osmolarity	08112021 Proteos 10 U1 osmolarity	08112021 Proteos 11 U1 osmolarity	08112021 Proteos 12 U1 osmolarity	08112021 Proteos 13 U1 osmolarity	08112021 Proteos 14 U1 osmolarity	08112021 Proteos 15 U1 osmolarity	08112021 Proteos 16 U1 osmolarity	08112021 Proteos 17 U1 osmolarity	08112021 Proteos 18 U1 osmolarity	08112021 Proteos 19 U1 osmolarity	08112021 Proteos 20 U1 osmolarity	08112021 Proteos 21 U1 osmolarity	08112021 Proteos 22 U1 osmolarity	08112021 Proteos 23 U1 osmolarity	08112021 Proteos 24 U1 osmolarity	08112021 Proteos 25 U1 osmolarity	08112021 Proteos 26 U1 osmolarity	08112021 Proteos 27 U1 osmolarity	08112021 Proteos 28 U1 osmolarity	08112021 Proteos 29 U1 osmolarity	08112021 Proteos 3 U2 osmolarity	08112021 Proteos 4 U2 osmolarity	08112021 Proteos 5 U2 osmolarity	08112021 Proteos 6 U2 osmolarity	08112021 Proteos 7 U2 osmolarity	08112021 Proteos 8 U2 osmolarity	08112021 Proteos 9 U2 osmolarity	08112021 Proteos 10 U2 osmolarity
Injection order		2	14	26	38	50	60	66	1	13	25	37	49	65	3	4	5	6	7	8	9	10	11	12	15	16	17	18	19	20	21	22	23	24	27	28	29	30	31	32	33	34	35	36	39	40	41	42	43
Period		BL	BL	BL	BL	BL	BL	BL	QC	QC	QC	QC	QC	QC	P1	P1	P1	P1	P1	P1	P1	P1	P1	P1	P1	P1	P1	P1	P1	P1	P1	P1	P1	P1	P1	P1	P1	P1	P1	P1	P1	P2	P2	P2	P2	P2	P2	P2	P2
Protein		BL	BL	BL	BL	BL	BL	BL	QC	QC	QC	QC	QC	QC	PF	PF	Z	WPI	Z	PF	WPI	Z	WPI	Z	PF	PF	WPI	Z	Z	PF	WPI	Z	WPI	PF	Z	WPI	PF	Z	WPI	PF	Z	PF	PF	Z	WPI	Z	PF	WPI	Z
Ret. Time	m/z
0.5034	723.123	0	0	0	0	0	0	0	0	0	0	0	0	0	0	0	0.0841	0.1777	0	0	0	0	0	0	0	0	0	0	0.1439	0	0	0	0	0	0	0	0	0	0	0	0	0	0	0	0	0	0	0	0
2.7123	722.497	0	10.5326	7.8486	0	0	6.4523	6.9669	0	0.3341	0.2149	0.6649	0.2567	0.1645	0.1823	0.1488	0	0	0	0	0.1304	0	0.2167	0.1889	0.1597	0.2601	0.1281	0	0	0.1239	0.1778	0.2177	0	0.2123	0.1391	0.2763	0.1724	0	0.681	0	0.4436	0	0.4342	0.339	0.3475	0.5357	0.6695	0.3613	0.8102
1.1742	722.093	0	0	0	0	0	0	0	0	0	0	0	0	0	0	0	0	0	0	0	0	0	0	0	0	0	0	0	0	0	0.0598	0	0	0	0	0	0	0	0	0	0	0	0	0	0	0	0	0	0
0.5818	721.639	37.877	45.1503	0	0	0	0	0	0	0	0	0	0	0	0	0	0	0	0	0	0.0841	0	0	0	0	0	0	0	0	0	0	0	0.0629	0	0	0	0.0774	0	0	0	0	0	0	0	0	0	0	0	0
1.0657	721.473	0	0	0	0	0	0	0	0	0	0	0	0	0	0	0	0	0.0853	0	0	0	0	0	0	0	0	0	0	0	0	0	0	0	0	0	0	0.1144	0	0	0	0	0	0	0	0	0.2905	0	0	0
0.5015	720.476	0	0	0	0	0	0	0	0	0	0	0	0	0	0	0	0	0	0	0	0	0	0	0	0	0	0	0	0	0	0	0	0.1006	0	0	0	0	0	0.6573	0	0	0	0	0	0	0	0	0	0
1.1446	720.452	0	0	0	0	0	0	0	0	0	0	0	0	0	0	0	0	0	0	0	0	0	0	0	0	0	0	0	0	0	0	0	0	0	0	0	0.3317	0	0	0.1511	0	0	0.6303	0	0	0	0	0	0
0.5592	720.171	0	0	0	0	0	0	0	0	0	0	0	0	0	0	0	0	0	0	0	0	0	0	0	0	0	0	0	0.0522	0.0353	0	0.0395	0	0	0	0	0.0344	0	0	0	0.0637	0	0	0	0	0	0	0	0
3.0533	719.715	0	0	0	0.2056	0.6915	0	0	0.0745	0.0646	0	0.048	0	0	0.0455	0.1677	0	0.2344	0	0	0	0.0346	0	0.2124	0	0	0	0.0436	0.0684	0	0	0.0604	0	0.0854	0	0.0977	0	0.4211	0	0.0258	0	0.0994	0	0	0	0.0248	0	0	0.0698
2.0579	719.055	0	0	0	0	0	0	0	0.1506	0.1819	0.1639	0	0	0.2593	0	0.1967	0	0.2071	0	0.0157	0.1137	0.2283	0	0.1061	0	0.2514	0	0.1445	0.0455	0	0.1314	0	0.1304	0.2125	0	0.1632	0.0991	0.0259	0	0.1928	0	0.3331	0	0	0	0.3505	0	0	0.3991
0.4563	718.527	0	0	0	0	0	0	0	0	0	0	0	0	0	0	0.0608	0	0	0	0	0.0947	0.1039	0	0	0.0575	0	0	0.1096	0	0	0	0.0532	0.2968	0.1074	0	0.1347	0	0	0.2387	0	0	0	0	0	0	0	0.1492	0	0.1055
1.5977	718.345	0	0	0	0	0	0	0	0	0	0	0	0	0	0	0	0	0.3382	0	0.4709	0.2229	0	0	0.0962	0.2421	0	0	0	0.2344	0	0	0.154	0	0	0	0	0.1363	0	0	0.2105	0.1524	0	0	0	0	0	0	0	0
0.5021	718.127	0	0	0	0	0	0	0	0	0	0	0	0	0	0	0	0	0	0	0	0	0	0	0	0	0	0	0	0	0	0	0	0	0	0	0	0.0416	0	0	0	0.0496	0	0	0	0	0	0	0	0
2.0672	718.054	0	0	0	0	0	0	0	0	0.1474	0.1362	0.118	0.1268	0.1194	0.2142	0.0985	0.1774	0.1272	0.1261	0.2294	0	0.143	0.0958	0	0	0.2052	0.1665	0.0414	0.0615	0	0	0	0.0293	0.183	0.1931	0.0933	0	0.2872	0.2049	0	0	0.227	0	0	0.2918	0.1779	0	0	0.2861
3.089	716.648	0	0	0	0	0	0	2.7886	0.3341	0.3971	0.273	0.3247	0.2368	0.3955	0.3037	0.4219	0.4519	0.2479	0.3474	0.2022	0.3944	0.3201	0.2404	0.3302	0.2295	0.4318	0.4693	0.1158	0.189	0.3824	0.4252	0.1575	0.3965	0.3518	0.3893	0.2129	0.3475	0.31	0.452	0.2375	0.1401	0.6248	0.4799	0.3073	0.5209	0.3265	0	0.389	0.3424
0.4545	716.533	0	0	0	0	0	0	0	0	0	0	0	0.1634	0	0	0	0	0	0	0.1233	0.0633	0	0	0.1083	0.0683	0.0842	0.1434	0.0898	0.0574	0.096	0	0	0.2945	0.0795	0	0.0932	0.1506	0	0.2006	0	0.0503	0.3315	0.19	0	0	0	0	0	0
2.4684	373.149	0	0	0	0	0	0	0	0	0	0	0.3587	0	0.2514	0	0	0	0	0	0	0	0	0	0	0.9822	0.3486	0	0	0.4404	0	0	0.3505	0	0	0	0	0.4958	0	0	0.8703	0.2024	0	0	0	0	0	0	0	0
2.9808	373.147	0	0	0	0	0	0	0	0	0	0.2831	0	0.298	0	0	0	0	0	0	0	0	1.2696	0.3607	2.4459	2.313	0.9642	1.0236	0.1147	0.9487	0	0	1.1844	0	0.2989	0	0.6245	0.7805	0.1229	0	1.8507	1.11	0	0	0.4949	0.5667	0.3309	0	0	0.8468
2.7903	373.147	0	0.516	0	0	0	0	0	0	0	0.026	0	0	0	0	0	0	0	0	0	0	0.6149	0	0.974	1.2828	0.3908	0.2521	0	0.373	0	0.0104	0.7061	0	0	0.0184	0	0.3301	0	0.0806	0.7858	0.3553	0	0	0	0.1513	0.0551	0.0002	0	0
0.7825	373.128	0	0	0	0	0	0	0	0	0	0	0	0	0	0	0	0	0	0	0	0	0.3866	0	0.3295	0.4178	0	0.5624	0	0.2674	0	0	0.2868	0	0.1221	0	0.1597	0.119	0.255	0	0.3936	0.8195	0	0	0	0	0	0	0	0
0.5856	373.126	0	0	0	0	0	0	0	0	0	0	0	0	0	0	0	0	0	0	0	0	0	0	0	0	0	0	0	0	0	0	0	0	0	0	0	0	0	0	0	0	0	0	0	0	0	0.2952	0	0
1.7252	373.09	0	0	0	0	0	0	0	0	0	0	0	0	0	0	0	0	0	0	0.1221	0.1607	0	0	0.1702	0.2597	0	0.2415	0	0.1066	0	0	0.1276	0	0	0	0	0.0829	0	0	0.1139	0.0749	0	0	0	0	0	0	0	0
2.3335	373.053	0	0	0	0	0	0	0	0	0	0	0	0	0	0	0	0	0.097	0	0	0	0.1577	0	0	0	0	0	0	0.0838	0	0	0	0	0	0	0	0	0	0	0	0	0	0	0	0	0	0	0	0
2.3349	373.024	0	0	0	0	0	0	0	0	0.1289	0	0.1894	0.1878	0	0.1459	0	0.1064	0	0	0	0	0	0	0	0	0	0	0	0	0	0	0	0	0	0	0	0	0	0	0	0	0	0	0	0	0	0	0	0
3.0929	372.801	0	0	0	0	0	0	0	0.6079	0.5597	0.4639	0.1588	0.3378	0	0	0.4193	0.4869	0.3743	0.3478	0.5413	0.0924	0.428	0.4385	0.3551	0.0974	0.3412	0.4615	0.0956	0.0657	0.0452	0.3041	0.197	0.184	0.292	0.2135	0.2451	0	0.2314	0.2892	0.3232	0.1657	0.3698	0.5718	0.1694	0.2432	0	0.5416	0	0.4107
0.7112	372.345	0	0	0	0	0	0	0	0.2856	0.3305	0	0	0	0	0.2842	0.2389	0.2235	0	0	0	0.1986	0.2016	0	0	0	0	0	0	0	0	0	0	0.1407	0	0	0.1193	0	0	0	0	0	0.2576	0	0.1828	0	0	0	0	0
0.4467	372.319	0	0	0	0	0	0	0	0	0	0.1272	0	0	0	0	0	0	0	0.1678	0	0	0	0	0	0	0.1115	0	0	0	0	0	0	0	0	0	0.0828	0	0	0	0	0	0	0	0	0	0	0	0	0
1.4398	372.274	0	0	0	0	0	0	0	0.2571	0.2852	0.3372	0.3395	0.2751	0.2965	0.1506	0.4335	0.9892	0.6682	0.2723	0.7043	0.4418	0	0.304	0.3074	0.1222	0.1959	0	1.1534	0.3557	0.4113	0.3596	0.0731	0.1989	0.6005	0	0.5731	0.3644	0.3552	0.2998	0.2819	0.1214	0	0	0.4105	0	0.248	0.4387	0	0
0.5157	372.258	0	0	0	0	0	0	0	0.1588	0.1517	0.1768	0.1522	0	0.1532	0	0	0	0	0	0	0	0	0	0	0	0	0	0	0	0	0	0	0	0	0	0	0	0	0	0	0	0.4166	0.2696	0.3107	0.3987	0.2434	0	0.4727	0.6527
1.9331	372.261	0	0	0	0	0	0	0	0.3058	0.1105	0	0	0.273	0	0.302	0.2571	0.9419	0.1393	0.3267	1.2325	0.4547	0	0.3237	0.3561	0.2814	0.5156	0	0.5422	0.1626	0.5229	0.6715	0.2257	0.707	0.6638	0	0.4588	0.0797	0.528	0.5229	0.4281	0.2063	0.3109	0	0	0	0.4024	0.3268	0	0.317
2.7544	372.237	0	0	0.0694	0.3518	0	0	0	1.9303	0.5972	0	0.1908	1.9633	1.6693	2.3304	4.2821	2.781	2.2863	0.9163	6.3219	0.2906	0.8723	5.5937	2.9029	0.3855	0.0306	0	0	0	2.7299	3.1789	2.2334	4.4993	2.0602	0.5959	2.3006	1.3658	2.3643	4.822	1.6847	1.5297	0.0558	0.8087	1.2633	0	0.0768	0.8004	0	0
2.5101	372.236	0	0	0	0	0	0	0	0	0	0	0	0.307	0	0	0.1482	0.0646	0.2897	0.1996	0.288	0.0228	0	0.1659	0	0	0.3905	0	0.4604	0	0.1101	0.1351	0	0.1636	0.4128	0	0.1794	0.1262	0	0	0	0.1493	0	0	0	0	0	0	0	0
2.0168	227.146	0	0	0	0	0	0	0	0	0	0	0	0	0	0	0	0	0.1131	0	0	0	0	0	0.0823	0.1247	0	0	0	0.1532	0	0	0	0	0	0	0	0	0	0	0	0	0	0	0	0	0	0.1093	0	0
3.1381	227.138	0	3.7912	0	0	0	0	0	0	0	0	0	0	0	0	0	0	0	0.1689	0	0	0	0	0.086	0	0	0.2908	0	0	0	0	0	0	0	0	0	0	0.3506	0	0.2034	0.1314	0	0.1983	0	0.1628	0	0	0.0239	0
1.1775	227.137	0	0	0	0	0	0	0	0	0	0	0	0	0	0	0	0	0	0	0	0	0	0	0	0	0	0	0	0	0.1816	0	0.212	0	0	0	0	0	0	0	0	0	0	0	0	0	0	0	0	0
0.565	227.131	0	0	0	0	0	0	0	0	0.6079	0.5819	0.3473	0.0988	0.3887	0.388	0.1616	0.2443	0.3698	0.2066	0.722	0.4436	0.608	0.75	0	0.1133	0.2831	0.8811	0.0762	0.1889	0.2902	0.3934	0	0.1212	0.6677	0	0.3537	0.1724	0.3466	0.9159	0.7025	0.2485	0.5034	0	0.1471	0	0.4911	1.0437	0.4884	0
2.7862	227.128	0	0	0	0	0	0	5.2844	0.2527	0.543	0	0.3243	0	0	0.4097	0	0.2811	0.4046	0.2704	0.4109	0	0	0.2576	0	0	0.1664	0.2493	0.1229	0.0521	0.2681	0.5524	0.3922	0	0.2575	0.352	0	0	0.2845	0.2666	0	0	0	0	0	0	0.0913	0	0.0572	0
0.7273	227.128	0	0	0	0	0	0	0	0.9511	0.817	1.3672	0.9069	1.1664	1.1472	3.2857	0.8784	1.0141	0.6669	0.629	1.4005	1.1145	0	1.9553	2.5303	1.0613	0.3369	0.4498	0.4388	1.2122	0.6893	1.8077	1.0505	0.8608	1.9246	3.1117	0.9159	1.341	0.8934	1.6183	2.0537	0.5644	2.2349	1.0084	0.2272	0.9208	1.3711	0.4231	0	0.3767
1.7939	227.128	0	0	0	0	0	0	0	6.7556	4.6514	5.974	6.6504	5.9606	5.9658	11.1353	10.4756	8.8767	5.8274	5.7002	6.5565	4.857	3.9573	10.3549	3.3521	2.8925	9.0431	4.9384	4.0002	4.7607	6.8518	4.2718	6.1214	8.2284	8.0509	13.5691	5.2306	4.6638	8.7737	6.2426	5.7337	1.9318	7.9771	5.1431	6.1951	4.4367	5.9572	4.7717	4.4415	3.5524
1.5934	227.127	0	0	0	0	0	0	0	0	0	0	0	0	0	0.6864	0	0.4332	0.3965	0	4.0965	2.6759	0	0	0	0	0	0	0	0	0	0	0	0	0	0	0	0	0	0	0	0	0	0	0	0	0	0	0	0
0.6769	227.089	0	0	0	0	0	0	0	0	0	0	0	0	0	0	0	0	0	0	0	0	0	0	0	0.1084	0	0	0	0	0	0.9234	0	0	0	0	0	0	0	0	0	0	0	0	0	0	0	0	0	0
1.0322	227.087	0	0	0	0	0	0	0	0	0	0	0	0	0	0	0	0	0	0	0	0	0	0.7033	0	0	0	0.5934	0	0.2152	0.1397	0.2359	0.1418	0.1381	0	0.632	0	0.1559	0	0	0.7433	0	0	0	0	0	0	0	0	0
1.3169	227.125	0	0	0	0	0	0	0	1.7248	1.7464	1.8112	0	1.8122	1.7338	1.9832	1.592	1.6134	1.1762	1.2075	1.8839	1.2746	0	1.7775	1.5498	1.0985	1.7362	1.8353	1.4205	1.1524	1.102	1.8251	1.6051	1.4621	1.4719	2.0097	1.3649	1.211	0	1.6902	1.6531	1.0539	0.1182	1.4584	1.9193	2.4201	1.7402	0	1.6165	1.754
0.8382	227.085	0	0	0	0	0	0	0	0.518	0.3429	0.3297	0.295	0.2116	0.3857	0.7907	0.4279	0.3528	0	0	0.4958	0.5533	0.2403	0.7746	0.84	0	0.305	0.3931	0	0.5398	0	5.8299	0.269	0	0.3402	0.774	0	0.2472	0	0.1626	0.232	0.0698	0.2977	0	0	0	0	0	0	0
1.6784	227.079	0	0	0	0	0	0	0	0	0	0	0	0	0	0	0	0	0	0	0	0	0	0	0.1424	0	0	0	0	0	0	0.2207	0	0	0	0	0	0	0	0	0	0	0	0	0	0	0	0	0	0
1.9129	227.077	0	0	0	0	0	0	0	0.1821	0	0.1446	0.1799	0	0	0.2196	0	0	0.2196	0.1133	0	0	0	0	0.2214	0.4611	0.5016	0	0	0.2187	0.5501	0.7372	0.2887	0	0.1784	0.2237	0.1874	0	0	0	0.2103	0.124	0	0	0	0	0	0	0	0
2.4669	227.066	0	0	0	0	0	0	0	0.3078	0.2313	0.1546	0.2429	0.2439	0.263	0.4013	0.187	0.2685	0	0.2496	0.4051	0.2698	0	0.279	0	0.1947	0.3248	0.3277	0.3095	0	0	0.3516	0	0	0.0437	0.3527	0.2596	0	0.4589	0	0.3615	0	0.5607	0.1437	0	0	0	0.3028	0	0.2901
1.2057	227.049	0	0	0	0	0	0	0	0	0	0	0	0	4.9734	0	0	0	0	0	0	0	0	0	0	0	0	0	0	0	0	0	0	0	0	0	0	0	0	0	0	0	0	0	0	0	0	0	0	0
3.0976	53.0481	0	0	0	0	0	0	0	0	0	0	0.0397	0	0.0406	0	0	0.1023	0	0.0986	0.1326	0.1284	0.0912	0	0	0.0671	0	0.1328	0	0.0663	0.108	0.0442	0.0477	0.1114	0	0.0737	0.1614	0.1137	0	0.0573	0	0	0.147	0.023	0	0.0264	0	0	0	0
3.1055	52.9809	0	0	0	0	0	0	0	0	0	0	0	0	0	0	0	0.1364	0	0.089	0	0	0.1452	0	0	0	0	0	0	0	0.1433	0.1061	0.0664	0.1474	0.0863	0	0.1727	0.029	0	0	0.0397	0	0.1704	0	0	0	0	0	0	0
3.1075	52.928	0	0	0	0	0	0	0	0	0	0	0	0	0	0	0	0	0	0	0	0	0.0964	0	0	0	0	0.1006	0	0.0625	0.1223	0.111	0.0572	0.1298	0	0	0.1369	0.1024	0	0	0.0371	0	0	0	0	0.0727	0	0	0.0404	0
3.093	52.8767	0	0	2.0863	0	0	0	0	0	0	0	0.0333	0.0456	0.0391	0	0.0867	0.1004	0	0	0.1006	0.1182	0.1263	0	0	0.0436	0	0.0888	0	0	0	0	0.0625	0.0263	0.0852	0	0	0.0952	0	0	0	0.014	0	0.08	0	0.0665	0.0362	0	0	0
3.0969	52.6762	0	0	0	0	0	0	0	0	0	0	0	0	0.0356	0	0.0607	0	0	0	0.1088	0.0701	0.0556	0	0.0553	0	0	0.026	0	0	0.0362	0	0.0342	0	0	0.0489	0	0	0	0.0559	0	0.0179	0.0926	0.0744	0	0.046	0.0586	0	0.0437	0.0727
2.072	51.2962	0	0	0	0	0	0	0	0	0	0	0	0	0	0	0	0	0	0	0	0	0	0	0	0	0.1259	0	0	0	0	0	0	0	0	0	0	0	0.1645	0	0	0	0.1567	0	0	0	0	0	0	0
2.0856	51.0762	0	0	0	0	0	0	0	0	0	0	0	0	0	0	0	0.0959	0	0	0	0	0	0	0	0	0	0	0	0	0	0	0	0	0	0	0	0	0	0	0	0	0.1455	0	0	0	0	0	0	0
3.0987	50.9819	0	0	0	0	0	0	0	0	0	0	0	0	0	0	0	0	0	0	0	0	0.0891	0	0	0	0	0	0	0.0195	0	0.052	0	0	0	0	0.0937	0	0	0	0	0.019	0.0646	0	0	0.0313	0.0465	0	0.0271	0
3.0968	50.9278	0	0	0	0	0	0	0	0	0	0	0.0267	0.0465	0.0445	0	0	0	0	0	0	0	0	0	0	0	0.01	0	0	0.0432	0	0.0589	0.038	0.072	0.0617	0.0642	0.0431	0	0	0	0.0368	0	0	0.0599	0	0.0231	0	0	0	0.0405
3.0956	50.8628	0	0	0	0	0	0	0	0	0	0	0.0211	0	0.0246	0	0.0503	0.0956	0	0	0	0.0733	0.0684	0	0	0	0	0.0642	0	0.0472	0	0.0889	0.0426	0	0.0511	0	0	0	0	0	0	0	0.0729	0	0	0	0	0	0.0196	0
3.1051	50.8156	0	0	0	0	0	0	0	0	0	0	0	0	0	0	0	0.1084	0	0	0	0	0	0	0	0	0	0	0	0.0504	0.1464	0.0889	0	0	0.0559	0	0.1218	0.086	0	0.0681	0	0	0.105	0	0	0	0	0	0	0
3.1011	50.7574	0	0	1.777	0	0	0	0	0	0	0.0385	0	0.045	0	0	0.0845	0	0	0	0	0.0731	0	0	0	0	0	0	0	0.0264	0.1061	0.0637	0.0634	0.1028	0	0	0	0.0357	0	0.0662	0	0	0	0	0	0	0	0.0211	0	0.0386
3.0994	50.7207	0	0	0	0	0	0	0	0	0	0	0	0.0427	0.0149	0	0	0.0954	0	0	0.1282	0	0.0863	0	0	0.0243	0	0	0	0.0471	0.1342	0.0818	0	0	0.0945	0.0765	0.136	0.0883	0	0.0536	0	0	0.0996	0	0	0	0	0	0	0
3.0994	50.6729	0	0	0	0	0.9222	1.5927	0	0.0226	0	0.0293	0	0.0374	0	0	0	0	0	0.0623	0	0.0875	0	0	0	0.0366	0	0.1164	0	0.0404	0.0804	0.0735	0	0	0	0.0941	0.1519	0.0954	0	0	0.0346	0	0.0857	0.067	0	0	0	0	0	0
3.1052	50.6032	0	0	0	0	0	0	0	0	0	0	0	0.0609	0	0	0	0	0	0	0	0	0.1175	0	0	0	0	0	0	0.0468	0	0.0847	0	0	0	0	0.1312	0.0952	0	0	0	0	0	0	0	0	0	0	0	0
1.1317	731.163	0	0	0	0	0	0	0	0	0	0	0	0	0	0	0.0877	0.0898	0.2741	0	0	0	0	0	0	0	0	0	0	0.1138	0.1259	0	0.1229	0.0646	0	0	0	0.1445	0	0	0	0	0	0	0	0	0	0	0	0
3.1571	731.134	0	0	0	0	0	0	5.5184	0.1594	0.6959	0.6604	0	0	0	0.019	0	0	0.2886	0.1757	0.0958	0	0	0.1991	0.5379	0.0069	0.3328	0.4251	0.1488	0.2866	0	0.4106	0.0386	0.4855	0.4764	0.5166	0.3787	0.1417	0.4371	0.0892	0.3151	0.3031	0.2251	0.575	0.8694	0	0.2481	0	0.9577	0.3704
2.0728	730.731	0	0	0	0	0	0	0	0	0	0	0	0	0	0	0	0.0837	0	0	0.2083	0.0848	0	0.1008	0.1192	0	0	0.1402	0.0952	0.0535	0	0	0	0	0	0.1528	0.1076	0.0546	0.1567	0	0	0	0	0	0	0	0.1372	0	0	0.1453
0.4443	730.561	0	0	0	0	0	0	0	0	0	0	0	0	0	0	0	0	0	0	0	0	0	0	0	0	0	0	0	0	0	0	0	0.1177	0	0	0	0	0	0.1371	0	0	0	0	0	0	0	0	0	0
0.5634	730.171	0	0	0	0	0	0	0	0	0	0	0	0	0	0	0	0	0	0	0	0	0	0	0	0	0	0	0	0.0351	0	0	0.0329	0	0	0	0	0	0	0	0	0	0	0	0	0	0	0	0	0
2.0814	730.065	0	0	0	0	0	0	0	0	0	0	0	0	0	0	0.0928	0	0	0.1132	0.1603	0	0	0	0.0791	0	0.1445	0	0	0	0	0	0	0	0.075	0.159	0.0883	0.0494	0.1912	0.1642	0	0	0.1462	0	0	0	0	0	0	0
0.5043	729.606	0	0	0	0	0	0	0	0	0	0	0	0	0	0	0	0.1041	0.1087	0	0	0	0	0	0	0	0	0	0	0	0	0	0	0	0	0	0	0	0	0	0	0	0	0	0	0	0	0	0	0
1.4384	729.26	0	0	0	0	0	0	0	0.173	0.1496	0.238	0.2353	0.1895	0.2541	0.1332	0.2789	0.3141	2.128	0.0445	0.8193	3.149	0.8636	0.102	1.0341	0.4694	0.1446	0.3283	0.3855	0.5573	0.0528	0	0.3301	0.0657	0.1673	0.0645	0.074	0.3183	0.2176	0	0.4489	0.3863	0.7503	0.2423	0	1.5094	0.159	0.2987	0.724	0.2686
0.4349	728.664	0	0	0	0	0	0	0	0	0	0	0	0	0	0	0.0834	0	0	0	0	0.0546	0	0.0888	0	0.0606	0.0976	0	0.102	0.1223	0	0.1431	0	0.1311	0	0.0584	0	0.0667	0	0	0	0	0	0	0	0	0	0	0	0
0.4446	728.594	0	0	0	0	0	0	0	0	0	0	0.3647	0.3834	0	0	0	0.1572	0	0	0	0	0.3332	0.1168	0.2334	0	0	0	0.1213	0.085	0	0.1888	0	0	0	0	0	0	0.3075	0	0.2603	0.064	0	0.2521	0.3146	0.7193	0	0.4317	0.5065	0.3865
0.5449	728.119	0	0	0	0	0	0	0	0.1579	0.3357	0.3086	0.2776	0.3177	0.3221	0.3258	0.3385	0.502	0.2552	0.304	0	0.254	0.3223	0	0	0.0731	0.2615	0	0.2011	0.3191	0.2364	0.3141	0.3339	0.3156	0.312	0	0.3063	0.2975	0	0.1601	0	0.4744	0.2192	0.4534	0.7955	0	0.2519	0	0.4176	0
3.0536	727.092	0	0	0.6274	0	0	0	0	0.0372	0	0.0332	0.0414	0	0.0047	0.0383	0	0.0758	0	0	0	0.108	0	0.0129	0.0571	0.0787	0	0.0742	0	0	0	0	0.0301	0	0	0	0.1558	0	0	0.115	0.1422	0	0	0	0	0	0	0	0	0.0302
0.5044	726.138	0	0	0	0	0	0	0	0	0	0	0	0	0	0	0	0	0	0	0	0	0	0	0	0	0	0	0	0.117	0.0432	0	0	0	0	0	0	0	0	0	0	0	0	0	0	0	0	0	0	0
0.5659	725.209	0	0	0	0	0	0	0	0	0	0	0	0	0	0	0.0626	0	0.0625	0.0645	0	0.0771	0.0646	0	0	0	0	0	0	0.2269	0.0628	0.1174	0.1868	0.0661	0.1925	0	0	0.1593	0	0	0	0.0531	0	0	0	0	0	0	0	0
0.421	724.219	0	0	0	0	0	0	0	0	0	0	0	0	0	0.1656	0	0	0	0.0824	0	0.1198	0	0	0	0	0	0	0	0.0503	0.0365	0	0	0	0	1.1119	0.1244	0	0	0	0	0.0793	0.2028	0	0	0	0	0	0	0
0.9202	723.478	0	0	0	0	0	0	0	0	0	0	0	0	0	0	0	0	0	0	0	0	0	0	0	0	0	0	0	0	0	0	0	0	0	0	0	0	0	0	0.2134	0	0.3406	0	0	0	0	0	0	0
2.7681	374.303	2.378	0	0	0	0	0	1.6637	0	0	0.0002	0	0	0	0	0	0	0	0	0.0371	0	0	0.1324	0	0	0	0	0	0	0	0	0	0.0009	0	0	0	0	0	0.0883	0	0	0	1.1371	0	0	0	0	0	0
0.7904	374.301	0	0	0	0	0	0	0	0	0	0	0	0	0.4927	0.1793	0	0	0	0.1458	0	0	0.1861	0	0	0	0	0	0	0	0	0	0	0	0	0.0894	0	0.3765	0	0	0	0	0	0.4463	0.3924	0.5932	0	0	0	0
2.9578	374.301	0	0	0	0	0	0	4.0193	0	0	0.1075	0	0	0	0	0	0	0.0433	0	0	0	0	0	0	0	0	0	0	0	0	0	0	0	0	0	0	0	0.0014	0	0.0743	0	0	0	0	0	0.1231	0.5365	0	0
2.4209	374.301	0	37.9542	0	0	0	0	0	0	0	0	0	0	0	0	0	0	0	0	0	0	0	0	0	0	0	0	0	0	0	0	0	0	0	0	0	0	0	0.1188	0	0	0	0	0	0	0	0	0	0
1.1634	374.3	0	0	0	51.2014	36.8504	0	0	0.1375	0.415	0	0	0.5933	0	0.4798	0	0	0	0.0675	0.5017	0	0	0	0	0	0	0.4075	0	0	0	0	0	0	0	0	0.4886	0	0.0173	0.3862	0	0	0.5236	0	0.1519	1.3658	0	0.8739	0.4008	0.5645
2.0877	374.3	0	0	0	0	0	0	0	0.1566	0	0	0.0964	0.0694	0	0	0	0.1317	0.1045	0.1476	0	0.0882	0	0	0	0	0.2451	0	0	0	0	0.3076	0.1714	0.1646	0	0	0	0	0	0.1455	0	0.0543	0	0.6574	0.1561	0.2546	0	0	0	0.5746
1.7428	374.296	0	0	0	0	0	0	0	0.4027	0.3128	0.5561	0.5125	0.4707	0.4867	0	0.4137	0.4197	0.2752	0.1199	0.8332	0.2776	0	0.2571	0.4403	0	0.2176	0.4269	0.9525	0.2619	0.1515	0.4914	0.1534	0.2734	0.4149	0	0.3687	0.2068	0.5658	0.4948	0.244	0	0.4861	0	0	0.2656	0	0.7048	0.1349	0
2.6027	374.253	0	0	0	0	0	0	0	0	0	4.3683	0	0	4.3042	4.5702	6.8189	3.93	3.6679	3.1688	9.6811	2.7422	0	5.4699	8.2876	5.2487	3.9199	0	7.0155	5.4503	3.359	4.339	3.7314	6.0028	13.279	6.6745	4.0567	4.1887	7.9591	7.4602	6.716	5.0559	5.201	5.9288	8.619	0.1018	0	0	0.1444	0
2.4887	374.248	0	0	0	0	0	0	0	0	0	0	0	0	0	0	0	0	0	0	0.2523	0	0	0	0	0	0	0.1733	0	0	0	0	0	0	0	0	0	0	0	0.3153	0	0	0	0	0	0	0	0	0	0
1.4401	374.157	0	0	0	0	0	0	0	0	0	0	0	0	0	0	0.2943	0	0	0	0	0	0	0	0	0	0	0	0	0	0	0	0	0	0	0	0	0	0	0	0	0	0	0.1428	0	0	0	0	0	0
0.7997	374.143	0	0	0	0	0	0	0	0	0	0	0	0	0	0.1707	0.2052	0.3501	0.1559	0	0.1726	0.1776	0	0.1501	0	0	0	0.2066	0	0.1559	0	0	0	0.1467	0	0.1218	0.207	0	0	0	0	0	0	0	0	0	0	0	0	0
0.5	374.127	0	0	0	0	0	0	0	0.7773	0.6469	0.6198	0.6596	0.7389	0.7213	0	3.5224	1.6367	0.7404	1.3372	0	3.2429	0.3039	0.6597	5.4221	2.0577	3.4176	0.5464	0.1251	0.4754	1.4541	0	0.1247	0	0	0.3677	0.8926	0.2606	0.1917	0	0	0.5592	0.2478	0.3389	0.1583	0.2371	0.6479	0	1.1929	0
2.8063	374.085	0	0	0	0	0	0	0	0.4873	0.4847	0.5246	0.6578	0.5411	0	0.76	0	0.2467	0.7571	1.0797	0.5799	0.9709	0	1.07	0.4471	0.8815	1.7976	1.4673	0	0.6296	0.5938	0.8384	0.5668	1.5391	0.8127	0.0877	0.4249	0.7535	1.392	1.2687	0.9403	0.3347	0.4276	0	0.3791	0	1.0116	0.4277	0	0
2.8074	373.238	0	0	0	0	0	0	0	0	0	0	0.2201	0	0.159	0	0	0	0	0.092	0	0	0.0632	0	0	0	0	0	0	0	0.2122	0.6586	0	0	0	0	0	0	0	0.8316	0	0.1678	0	0	0	0	0.3533	0	0	0
2.0152	373.197	0	0	0	0	0	0	0	0	0	0	0	0	0	0	0	0	0	0	0	0	0	0	0	0	0	0	0	0	0	0	0	0	0	0	0	0.3984	0	0	0	0	0	0	0	0	0	0	0	0
0.5766	373.193	0	0	0	0	0	0	0	0	0	0	0	0	0	0	0.2219	0.1693	0	0	0.4104	0	0	0.3482	0	0.125	0	0	0	0.1967	0.0497	0	0	0.1277	0	0	0	0.1468	0	0.1897	0	0	0	0	0	0	0	0.3134	0	0
1.0611	228.082	0	0	0	0	0	0	0	0	0	0	0	0	0	0	0	0	0	0	0	0	0	0.3001	0	0	0	0.2413	0	0	0	0	0	0	0	0.1898	0	0	0.1801	0	0.1577	0	0	0	0	0	0	0.2226	0	0
0.4351	228.032	0	0	0	0	0	0	0	0	0.1415	0	0	0	0	0.1478	0.134	0	0.0524	0.0826	0.0848	0.1063	0	0.1081	0.1034	0	0.1112	0.0959	0.1284	0.0587	0.0414	0.1145	0.0481	0.119	0.0724	0.0848	0	0	0	0	0	0.0507	0.1171	0.1479	0	0	0	0	0	0.1414
0.8316	228.067	0	0	0	0	0	0	0	0.3	0.2341	0.1731	0.2077	0.1459	0.1853	0.4575	0.2696	0.1581	0.197	0	0.3365	0.2233	0.2051	0.812	0.4651	0.3287	0.2638	0.5762	0.1814	0.2592	0.2869	0.3235	0.1529	0.1948	0.2209	0.3925	0	0.325	0.3192	0	0.4472	0.0857	0.2542	0	0	0.3061	0	0.3039	0	0.1696
2.6889	228.021	1.2091	0	0	0	0	1.0645	0	0	0.0113	0	0	0	0	0.5743	0	0.0977	0	0	0.6494	0	0	0	0	0	0	0	0.1444	0	0.0163	0	0	0	0	0	0	0	0	0	0	0	0.2484	0	0	0	0	0	0	0
3.1068	228.021	0.8018	0	0	0	0	0	0	0	0	0	0	0	0	0	0	0	0	0	0	0	0	0	0.4767	0	0	0	0	0	0.0738	0	0	0	0	0	0	0	0	0	0	0	0	0	0	0	0	0	0	0
1.9208	228.02	0	0	0	0	0	0	0	0	0	0	0	0	0	0	0	0.2984	0	0.0983	0.4616	0	0	0	0	0	0	0	0	0	0	0	0	0	0	0	0	0	0	0	0	0	0	0	0	0	0	0	0	0
1.6616	228.02	0	0	0	0	0	0	0	0	0	0	0	0	0	0	0	0.5239	0	0	0	0	0	0	0	0	0	0	0.2129	0	0	0	0	0	0	0	0	0	0	0	0	0	0	0	0	0	0	0	0	0
3.3512	228.018	0.3803	0	0	0	0	0	0	0	0	0	0	0	0	0.0016	0	0	0	0	0	0	0	0	0	0	0.2204	0	0.202	0	0	0	0	0	0	0	0	0	0	0	0	0.0103	0	0.013	0	0	0	0	0	0
2.3905	228.01	0	0	0	0	0	0	0	0	0	0	0	0	0	0	0	0	0	0	0.1085	0	0	0.3112	0	0	0	0	0	0	0	0	0	0	0	0.418	0	0	0.3556	0	0	0	0	0	0	0.936	0	0	0	0
1.4877	227.994	0	0	0	0	0	0	0	0.6199	0.4921	0.4057	0.4847	0.3842	0.2633	0.285	0.2543	0.3281	0.2565	0.2688	0.4535	0.2665	0.2524	0	0.1676	0.1226	0.318	0.3393	0.222	0	0	0.1942	0.1348	0	0	0.2075	0.1918	0	0.3301	0	0	0.1163	0.2815	0.6952	0.6824	0.9493	0.446	0.6482	0.8765	0.7702
1.1981	227.994	0	0	0	0	0	0	0	0	0	0	0	0	0	0	0	0	0	0	0	0	0	0	0	0	0	0	0	0	0	0	0	0	0	0	0	0	0	0	0	0	0	0	0	0.1616	0	0	0	0
0.914	227.21	0	0	0	0	0	0	0	0	0	0	0	0	0	0	0	0	0	0.3839	0.2476	0	0	0.2836	0	0	0	0	0	0	0	0	0	0	0	1.1007	0	0	0	0	0	0	0	0	0	1.186	0	0.7364	0	0
0.4799	227.2	0	0	0	0	0	0	0	0	0	0	0.2471	0	0	0.427	0.2964	0	0	0	0	0	0	0	0	0	0	0	0	0	0	0.2044	0	0.3753	0	0.3846	0.327	0	0.3988	0	0	0.0453	0.3839	0	0.4582	0	0.5245	0.7012	0	0
0.6728	227.181	0	0	0	0	0	0	0	0.4806	0.4136	0.4459	0.409	0.519	0.1287	0.1708	0	0	0	0	0	0	0	0	0	0	0.0997	0.0442	0	0	0	0	0	0	0	0	0.3016	0	0	0.1715	0.5526	0.2584	0	0	0	0	0.4353	0.4596	0.3661	0
1.408	227.175	0	0	0	0	0	0	0	4.4943	4.7051	4.5146	4.7391	4.5916	4.9579	0	5.5482	0	0.1172	0	1.5166	0	0	8.3249	1.0815	0	0	0	1.8917	17.7588	5.6103	0	0	15.0686	8.6953	0	0	14.0273	0	27.3415	15.3323	0	0	5.8552	0	0	0	1.4673	0	0
0.9812	227.154	0	0	0	0	0	0	0	0	0	0	0	0	0	0	0	10.0972	0	0	0	0	0	0	0	0	0	0	0	0	0	0	0	0	0	0	0	0	0	0	0	0	0	0	3.9151	0	0	0	0	0
2.0737	55.8079	0	0	0	0	0	0	0	0	0	0	0	0	0	0	0.1065	0	0.099	0.1113	0.1609	0	0	0	0	0	0	0.1182	0	0	0	0	0	0	0	0.1908	0.1022	0	0.262	0	0	0	0	0	0	0	0	0	0	0.1817
2.0752	55.6977	0	0	0	0	0	0	0	0	0	0	0	0	0	0	0.1192	0.1163	0	0.0991	0.1653	0	0.1371	0	0	0	0	0	0	0.0515	0	0	0	0	0.1158	0	0	0	0.1966	0.1642	0	0	0	0	0	0.22	0	0	0	0
2.0743	55.6219	0	0	0	0	0	0	0	0	0	0	0	0	0	0	0	0	0	0	0	0	0.1435	0	0	0	0.1421	0	0.1104	0.0494	0	0	0.0625	0	0	0.1574	0	0	0	0	0	0	0.2665	0	0	0	0	0	0	0
3.1036	55.6085	0	0.4653	0	0	0	0	0.2643	0	0	0	0.0274	0.0479	0	0	0	0	0	0	0	0	0	0	0	0	0	0	0	0	0	0	0.0402	0.0799	0	0	0	0.0689	0	0	0	0	0.0712	0	0	0	0.056	0	0	0
3.1061	55.5498	0	0	0	0.048	0	0	0	0	0	0	0.0203	0	0	0	0	0	0	0	0	0.0766	0.1023	0	0	0	0	0	0	0	0.1085	0.0617	0	0.0987	0.0209	0	0	0	0	0	0	0	0	0	0	0	0	0	0	0
2.0806	55.501	0	0	0	0	0	0	0	0	0	0	0	0	0	0	0	0.1223	0.1031	0	0	0	0.1265	0	0	0	0	0	0	0	0	0	0	0	0	0	0.1108	0	0	0	0	0	0	0	0	0	0.1266	0	0	0
3.096	55.4718	0	0	0	0	0	0	0.6046	0	0	0	0.0424	0.047	0.0567	0	0.0719	0	0	0	0.0337	0.0785	0.0957	0	0	0	0	0.1022	0	0.0491	0	0.0719	0.0426	0	0.0699	0	0	0.0857	0	0	0	0.0133	0.0986	0.0733	0	0	0.06	0.0144	0	0.0387
2.069	55.4393	0	0	0	0	0	0	0	0	0	0	0	0	0	0	0.0993	0	0.1134	0	0	0	0	0	0	0	0	0	0.1066	0	0	0	0	0	0	0	0.1133	0	0	0	0	0	0	0	0	0	0	0	0	0
3.0895	55.4136	0.3709	0.3306	0	0	0	0	0	0	0.0316	0.0249	0	0.0348	0	0	0.0668	0	0	0.0454	0.1142	0.0416	0.0757	0.0744	0	0.0309	0	0.0824	0.0179	0	0.0313	0	0.0555	0	0	0.0638	0	0	0.0209	0	0.0271	0.0132	0	0.0691	0	0.0575	0	0	0.0329	0.0336
0.6647	55.0544	0	0	0	0	0	0	0	0	0	0	0	0	0	0	0	0	0	0	0	0.1744	0	0	0	0	0	0	0	0	0	0	0	0	0	0	0	0	0	0	0	0.1702	0	0	0	0	0	0	0	0
3.1028	53.433	0	0	0	0	0	0	0	0	0	0	0	0.0314	0	0	0	0.0933	0	0	0	0	0	0	0	0	0	0	0	0.0379	0	0.0575	0	0.0729	0	0	0.1044	0.0699	0	0	0	0	0	0.0533	0	0	0	0	0	0
3.1094	53.3803	0	0	0	0	0	0.4644	0	0	0	0	0	0.0121	0	0	0	0	0	0	0	0	0.0926	0	0	0	0	0	0	0.0496	0.0946	0.0613	0	0	0	0	0.1316	0	0	0	0	0	0	0	0	0	0	0	0	0
3.1144	53.3245	1.1088	0.2658	0	0	0	0	0	0	0	0	0	0	0	0	0	0	0	0	0	0	0	0	0	0	0	0	0	0.0643	0.1121	0	0	0	0.0998	0	0	0	0	0	0	0	0	0	0	0	0	0	0	0
3.0998	53.2401	0	0	0	0	0	0.5844	0	0	0	0	0	0	0.039	0	0	0	0	0.0825	0.0983	0.0927	0	0	0	0	0	0	0	0.0638	0	0.0755	0.0452	0.1183	0.0602	0	0.1132	0	0	0.1178	0.0415	0	0.1377	0	0	0	0.0719	0	0	0
3.1004	53.1628	0	0	1.4741	0	0	0	1.4319	0	0	0	0	0.0856	0	0	0	0.1393	0	0.0726	0.1036	0.1016	0	0	0	0.0214	0	0	0	0.0572	0	0	0	0.149	0	0	0.1457	0	0	0	0.0393	0	0.121	0.0942	0	0	0	0	0	0
3.0956	53.1205	0	0	0	0	0	0	0	0	0	0	0	0.0483	0	0	0.0738	0.1088	0	0	0	0	0	0	0	0.0317	0	0	0.0297	0.0359	0	0.077	0.0625	0	0.0948	0	0	0	0	0.0896	0	0.0271	0.1462	0.0712	0	0	0.0615	0	0	0
1.9716	736.519	0	0	0	0	0	0	0	0.1175	0.1818	0.3158	0.4518	0.2304	0.5025	0.0968	0.0985	0.1394	0.0902	0.0986	0.176	0	0.1132	0.1554	0.1399	0.1002	0.2347	0.2224	0.1494	0.0942	0.151	0.1053	0.1217	0.1905	0.1508	0.2424	0.137	0.2589	0.2326	0.259	0.2922	0.1969	0.6072	0.1476	0.2475	0.3676	0.1946	0.3978	0.2629	0.2416
0.432	735.674	0	0	0	0	0	0	0	0	0	0	0	0	0	0	0.6493	0	0.2381	0.0806	0.0717	0.1539	0	0.3457	0.0752	0.1427	0.3154	0.1114	0.2933	0.2939	0	0.3087	0	0.3473	0.1208	0.2077	0	0.0814	0	0	0	0	0	0.1604	0	0	0	0	0	0
0.5651	735.177	0	0	0	0	0	0	0	0	0	0	0	0	0	0	0	0	0	0	0	0	0	0	0	0	0	0	0	0.0674	0	0	0	0	0	0	0	0	0	0	0	0.0453	0	0	0	0	0	0	0	0
1.6711	734.525	0	0	0	0	0	0	0	0.4867	0.4898	0.5371	1.2506	0.9514	1.1623	0.2901	0.1266	0.1521	0.161	0.281	0.3616	0.3341	0.2144	0.5154	0.6151	0.5691	0.4431	0.6958	0.2736	0.213	0.1834	0.349	0.4807	0.213	0.5569	0.7287	0.1353	0	0.8477	0.1943	0.8183	0.5752	1.3351	0.5885	0.8274	0.7417	0.7261	1.0928	1.1954	0.9201
0.4915	734.497	0	0	0	0	0	0	0	0	0	0	0	0	0	0	0	0	0	0	0	0.065	0	0	0	0	0	0	0.0849	0.0339	0	0	0	0.1447	0	0	0.0461	0	0	0.3808	0	0	0	0	0	0	0	0	0	0
0.9673	734.468	0	0	0	0	0	0	0	0.7473	0.4868	0.5364	0.4229	0.66	0.4629	0.198	0	0.2327	0	0.4712	0	0.0944	0.5326	0	0.101	0	1.5532	0.1616	0	0.062	0.323	0.1542	0.1207	0.1026	0	0.7303	0	2.7192	0	0.2776	1.0982	0.5757	1.5978	94.7217	0.2535	0.3375	1.9407	0.2712	0	1.001
1.7863	733.282	0	0	0	0	0	0	0	0	0	0	0	0	0	0	0	0	0	0	0.1263	0	0	0	0	0.0676	0	0	0	0.0423	0	0	0	0	0	0	0	0	0	0	0	0	0	0	0	0	0	0	0	0
1.1364	733.175	0	0	0	0	0	0	0	0	0	0	0	0	0	0	0	0	0	0	0	0	0	0	0	0	0	0	0	0	0.1499	0	0.0421	0	0	0	0	0.1367	0	0	0	0.0513	0	0	0	0	0	0	0	0
0.4263	733.17	0	0	0	0	0	0	0	0	0	0	0	0	0	0	0	0	0.0463	0	0	0	0	0	0	0	0	0.1044	0	0	0	0	0	0	0	0	0	0.0462	0	0	0	0	0	0	0	0	0	0	0	0
0.4496	732.545	0	0	0	0	0	0	0	0.2085	0.1554	0.2117	0.1881	0.2047	0.2727	0.241	0.1201	0.1409	0.1086	0.1158	0.1892	0.1436	0.1464	0.1355	0.0837	0.0842	0.0678	0.1084	0.1855	0.0773	0.0953	0	0.0699	0.4254	0.0592	0.1785	0.169	0.1176	0.2523	0.553	0.1062	0.0839	0.2328	0.2741	0	0.4962	0	0.167	0	0.2321
0.603	732.452	0	0	0	0	0	0	0	0	0	0	0	0.2148	0.1634	0	0	0	0	0	0	0	0	0	0	0	0	0	0	0	0	0	0	0	0	0	0	0	0	0	0	0	0	0	0	0	0	0	0	0
1.595	732.361	0	0	0	0	0	0	0	0	0	0	0	0	0	0	0	0	0	0	0	0	0	0	0.29	0.6081	0	0	0	0.5151	0.089	0	0.4264	0	0.098	0	0	0.2761	0	0	0.5331	0.3958	0	0	0	0	0	0	0	0
2.0793	732.063	0	0	0	0	0	0	0	0	0	0	0	0	0	0.1029	0	0.1013	0	0	0	0	0.1003	0	0	0	0.1272	0	0	0	0	0	0	0	0	0	0.0916	0	0.1905	0.1338	0	0	0.1494	0	0	0	0	0	0	0
0.7481	731.455	0	0	0	0	0	0	0	0.145	0.3079	0.0708	0	0.1739	0.1735	0	0	0	0.136	2.7802	0.3556	0	1.6877	0	0	0.2901	0.1225	0	0.2766	0.1669	0	0.6788	0	0.1041	0.4151	0.5674	0	0	0	0	0	0.1503	0	0	0	0	0.424	0	0	0
0.4248	731.415	0	0	0	0	0	0	0	0	0	0.1178	0	0	0	0	0	0	0	0	0	0	0	0	0	0	0	0	0	0	0	0	0	0	0.0912	0	0	0	0	0	0	0	0	0	0	0	0	0	0	0
2.0684	731.397	0	0	0	0	0	0	0	0	0	0	0	0	0	0	0.0956	0	0.1468	0	0	0	0.1258	0	0.1205	0	0.1495	0.0743	0.1152	0	0	0	0	0	0.1338	0.1914	0.1125	0	0.3258	0	0	0	0	0	0	0.2764	0	0	0	0
2.5334	375.317	0	0	0	31.0957	0	20.4755	0	0	0	0	0	0	0	0	0	0	0	0	0	0	0	0	0	0	0	0	0	0	0	0	0	0	0	0	0	0	0.214	0	0	0	0	0	0	0.6807	0	0.1799	0.2859	0
1.897	375.316	0	0	0	28.4565	0	0	54.854	0.401	0.4003	0.3805	0.0834	0	0.5347	2.1015	1.5553	1.4454	0.1835	1.2008	1.6964	1.4524	0.3624	0.4664	1.2675	0.9373	1.5732	0.4362	1.3422	0.2089	0.9664	1.7031	0.8423	1.374	1.21	1.9931	1.6181	0.35	3.0138	1.8524	1.5781	1.0075	2.3173	0.3934	1.9888	0.6326	0.3841	0.1454	0	0.6059
3.1426	375.316	16.0229	0	0	0	0	32.4151	1.0515	0	0	0	0	0	0	0	0	0	0	0	0	0	0	0	0	0	0	0	0	0	0	0.0098	0	0	0	0	0	0	0	0	0	0	0	0	0	0	0	0	0	0
1.6695	375.316	0	0	36.4163	0	0	0	0	0	0	0	0	0.7413	0.4476	0	0	0	0	0	0	0	0	0	0	0	0	0	0	0	0	0	0	0	0	0	0	0	0	0	0	0	0	0	0	0	0	0	0.5628	0.2638
1.4736	375.315	0	0	0	0	0	26.3622	0	0	0	0	0	0	0	0	0	0	0	0	0	0	0	0	0	0	0	0	0	0	0	0	0	0	0	0	0	0	0	0	0	0	0	0	0	0	0	0	0.3246	0
0.3144	375.314	0	0	0	0	26.8033	0	0	0	0	0	0	0	0	0	0	0	0	0.1101	0	0	0	0	0	0	0	0	0	0	0	0	0	0	0	0	0	0	0	0	0	0.009	0	0	0	0	0	0	0	0.4954
2.4311	375.213	0	0	0	0	0	0	0	0	0	0	0	0	0	0.2797	0.5921	0	0	0	0.272	0.2819	0	0.5475	0	0	0	0.1455	0	0	0	0	0	0.3819	0	0	0	0	0	0	0	0	0	0	0	0	0	0	0	0
0.9819	375.213	0	0	0	0	0	0	0	0	0	0	0	0	0	0	0	0	0.1015	0	0	0	0	0	0	0	0	0	0	0	0	0	0	0	0	0	0	0	0	0	0	0	0	0	0	0	0	0	0	0
0.6558	375.176	0	0	0	0	0	0	0	0	0	0	0	0	0	0	0	0	0	0	0	0	0.2735	0	0.1568	0.1746	0	0	0	0.0873	0	0	0.1535	0	0	0	0	0	0	0	0.3503	0.2042	0	0	0	0	0	0	0	0
0.9241	375.141	0	0	0	0	0	0	0	0.6085	0.5091	0.5191	0.5105	0.5598	0.3915	0	0	0	0	0.0971	0.1274	0.1869	1.0628	0.5485	1.7347	2.1277	0.5209	1.7927	0.4963	1.6595	0.2068	0	1.2111	0.8408	0.4764	0.7103	0.8537	0.8569	0.2042	0.5515	1.8209	1.9455	0	0	0	0	0	0	0	0.6263
0.7084	375.139	0	0	0	0	0	0	0	0	0	0	0	0	0	0	0.0877	0.0979	0.135	0	0	0	0	0	0	0	0	0	0	0	0	0	0	0	0	0	0	0	0	0	0	0	0	0	0	0	0	0	0	0
0.5707	375.121	0	0	0	0	0	0	0	0	0	0	0	0	0	0	0	0	0	0	0.1574	0	0.1325	0	0	0	0	0	0.0523	0	0	0	0	0	0	0	0	0	0.2107	0	0.1263	0	0.199	0	0	0	0	0	0.1438	0.2809
3.5117	375.099	0	0	0.3406	0	0	0	0.1869	0	0.1181	0	0	0	0	0	0	0	0	0	0	0	0	0	0	0.0917	0	0.0527	0	0	0	0	0	0	0	0	0.0231	0.0017	0.0087	0	0	0	0.0683	0	0	0	0	0	0.3691	0
3.1581	375.099	0	0	0	0	0	0.0963	0	0.0788	0.5444	0	0	0	0	1.1773	0	0	0.2411	0.8872	0.6209	0	0	0.6498	0.0729	0.3154	0	0	0.0996	0	0.3788	0	0.6048	0	0.4081	0	0	0	0	0	0	0	0	0	0	0.4913	0	0	0	0
3.0884	374.808	0	0.0641	0	0	0.1116	0	0	14.4914	14.3693	13.6381	15.1092	14.5984	14.6631	12.9034	13.5835	18.2182	10.4556	14.0529	19.9517	14.6852	16.907	14.361	12.9755	9.3556	14.5371	18.5264	7.115	8.6539	14.11	14.7259	9.9159	14.6676	13.9083	15.9351	16.3719	12.7698	11.8097	15.4313	10.8191	6.6948	21.4489	21.2924	11.3848	20.3286	15.941	8.6441	16.6373	17.8514
0.4349	374.303	0	0	0	0	0	0	0	0	0	0	0.1429	0	0.3466	0	0	0	0	0.2124	0	0	0.0613	0	0	0	0	0	0.0916	0	0	0	0	0	0	0.3549	0	0	0	0	0	0	0	0	0	0	0.2384	0	0	0
0.7878	229.106	0	0	0	0	0	0	0	6.2582	7.1033	6.2443	6.7949	6.3436	6.0973	0	0.5882	0.946	0.2144	0.5503	0	0.09	0.2706	2.1291	0.1532	0.108	0.6676	0.5193	0.5411	0	0.0143	71.8611	0	0.2242	0.32	0.588	0.4565	0	0.3742	0	0.7139	0.5701	0.0478	0.9362	0.1543	0	0.8167	0	0	0.1829
1.8884	229.08	0	0	0	0	0	0	0	0	0	0	1.1769	1.1062	1.0081	1.715	0	0	0	0	3.8871	0.465	0	0	0.8422	1.8273	1.8209	0	0	1.104	0.8723	0	1.0405	0.3829	1.6933	1.6416	0.3522	0.4894	1.0769	0.6816	1.4667	0.2829	0.5901	0	0	0	0.7744	5.7834	0	0
1.6699	229.08	0	0	0	0	0	0	0	1.3842	1.2413	1.0875	1.1981	1.022	0.9468	1.6659	0	0	0	0.6237	7.7461	0.9634	0	1.5854	0.8386	0.767	1.678	1.0513	0	0.448	1.6042	3.6495	0	0.8965	1.5973	0.7735	0	0	1.9292	1.6207	1.2259	0	0.4804	0	0	0	0	4.7321	0	0
2.3391	229.064	0	0	0	0	0	0	0	0	0.6518	0.6992	0.724	0	0	0.6491	0.4733	0.6445	0.8585	0.5559	0	0.5391	1.1374	0	0.1794	0.2785	0.4761	0	0.5036	1.5541	0.9094	0.6773	1.0868	0.9115	0.8084	0	0.9219	1.0849	0	0.8972	0	0.9101	0.2085	0	0.8251	0	0.6187	0	0	0
1.208	229.063	0	0	0	0	0	0	0	0	0	0	0	0	0	0	0	0	0.2083	0	0	0	0.2793	0	0	0	0	0	0	0.1778	0	0	0	0	0	0	0	0	0	0	0	0	0	0	0	0	0	0	0	0
0.9244	229.041	0	0	0	0	0	0	0	0.5581	0.3701	0.6229	0.561	0.6158	0.8786	0	0.8516	0.889	1.4048	0.5056	0	0.5005	1.2292	0	0	0	0.6352	0	0.3669	1.7909	1.617	0.8072	1.6481	2.0959	0.6934	0	0.8101	1.8615	0	0.7317	0	1.0623	0	0	0.6952	0	0	0	0	0
0.7019	229.017	0	0	0	0	0	0	0	0	0	0	0	0	0	0	0	0	0.3971	0	0	0	0	0	0	0	0	0.9388	0	0	0	0	0	0	0	0	0	0.3157	0	0	0	0	0	0	0	0.5965	0	0.3522	0	0
0.4233	229.017	0	0	0	0	0	0	0	0.3378	0.3146	0.3342	0.3715	0.3081	0.3416	0.4752	0.3066	0.3168	0.8472	0.4066	0.5752	0.1533	0	0	0	0	0.4479	2.9486	0	0.309	0.3963	0.3838	0.0982	0	0.2729	0.4563	0.8616	1.4056	0.2068	0.0931	0	0.2138	0.5378	0.1983	0	1.0382	0.418	1.1419	0	0
0.4628	228.194	0	0	0	0	0	0	0	0.5001	0.4066	0	0	0	0	0	0	0	0	0	0	0	0	0	0	0	0	0	0	0.0632	0.1046	0	0	0	0	0	0	0	0.37	0	0.1799	0	0	0	0	0.4239	0	0.5298	0.4152	0
3.5244	228.159	0	0	0	0	0	0	0	0	0	0.3329	0	0	0	0	0	0	0	0.1512	0	0	0	0	0	0.464	0	0	0.4338	0	0	0.3542	0	0.416	0.2184	0	0.0628	0.1598	0.2915	0.0997	0.4307	0.1178	0	0	0.1103	0	0	0	0	0
0.6927	228.157	0	0	0	0	0	0	0	0	0	0	0	0	0	0	0	0	0	0	0	0	0	0	0	0.1112	0	0	0	0	0	0	0	0	0	0	0.2366	0	0	0	0	0	0	0	0	0	0	0	0	0
1.3296	228.129	0	0	0	0	0	0	0	0	0	0	0	0	0	0	0	0	0	0	0	0	0	0	0	0	0	0	0	0	0	0	0	0	0	0	0.2303	0	0	0	0	0	0	0	0	0	0	0	0	0
1.9822	228.122	0	0	0	0	0	0	0	0.9142	0.9469	1.1432	1.0345	0.9189	1.0075	1.7846	1.662	1.1004	0.6864	1.1479	1.9908	0.6362	0.2359	2.5111	0.9031	0.8044	0.5964	0.611	0.6426	1.3562	0.9422	0.9938	0.385	2.9433	1.2015	1.3231	0.9573	1.5094	1.1129	2.3595	1.865	0.7925	1.1852	1.1376	0.8793	0	1.0139	1.137	0.4261	0.5125
0.5338	228.108	0	0	0	0	0	0	0	0	0	0	0	0	0	0	0.2333	1.5264	0	0	0	0	0	0	0.0918	0	0	0	0	0	0	0	0	0	0	0	0	0	0	0	0	0	0.2482	0	0.8495	0	0.1574	0.2998	0	0
2.4382	228.099	0	0	0	0	0	0	0	0	0	0	0	0	0	0	0	0	0	0	0	0	0	0	0	0	0	0	0	0	0	0	0	0	0	0	0	0	0.3834	0	0	0	0	0	0	0	0	0	0	0
1.2069	228.088	0	0	0	0	0	0	0	0	0	0	0	0	0	0	0	0	0	0	0.5862	0	0	0.7945	0.8585	0	0	2.1584	0	0	0	0	0.3329	0	0	0.2239	0	0	0.4326	0	0.2564	0	0.2284	0	0	0	0	0	0	0
0.5043	60.0449	0	0	0	0	0	0	0	0	0	0	0	0	0	0	0	0	0.0735	0	0	0	0	0	0	0	0	0	0	0.1071	0.0584	0	0	0	0	0	0	0.1269	0	0	0	0.0837	0	0	0	0	0	0	0	0
3.0881	59.9982	0	0	0	0	0	0	0	0	0	0.0165	0	0	0.0459	0	0.0267	0	0	0.0606	0.1051	0	0	0.0909	0.0721	0	0	0.0826	0	0.0612	0	0	0.0298	0	0.0817	0.0824	0	0	0.0236	0	0.0158	0.0239	0	0	0	0	0.0353	0	0.0503	0.0346
1.1101	59.0734	0	0	0	0	0	0	0	0.1945	0	0	0	0	0	0	0	0	0.1048	0	0	0	0	0	0	0	0	0	0	0	0	0	0	0.093	0	0	0	0	0	0	0	0	0	0	0	0	0	0	0	0
3.4466	59.0733	0	0.1076	0	1.5799	0	0	0.0315	0.4147	0	0	0	0	0	0.57	0	0.4062	0	0.5586	0.2253	0.1499	0	0.1873	0.521	0	1.3399	0.3433	0.4718	0.6641	0.356	0	0	0	0	0.5075	0	0	0	0	0	0.0206	0	0	0.3332	0.2047	0	0	0	0
0.4817	59.0489	0	0	0	0	0	0	0	0.1549	0.1333	0.1628	0.1584	0.1246	0.2165	0	0	0	0	0	0	0	0	0	0	0	0	0	0	0	0	0	0	0	0	0	0	0	0	0	0	0	0	0	0	0	0	0	0	0
0.8479	58.0656	0	0	0	0	0	0	0	0.1908	0.21	0.1485	0.1718	0.2265	0.2003	0.1385	0.2534	0.1373	0.7102	0.3349	0	0.1494	0	0.1685	0.2883	0.2274	0.1445	0.6608	0.7557	0.271	0.1133	0.2115	0.2972	0.13	0.1818	0.1426	0	0.1094	0.1896	0.1783	0.4403	0.143	0	0	0	0	0.1616	0	0	0
1.1182	58.0655	0	0	0	0	0	0	0	0.407	0.358	0	0.4133	0.355	0	0.6154	0.3904	0	0.1868	0.3269	0.4105	0.5073	0.2865	0.5718	0.402	0.4435	0	0.724	0.4241	0.2701	0	0.4085	0.269	0	0.2953	0.629	0.3674	0.2217	0.495	0.4402	0.5604	0.2096	0.4395	0	0.3855	0	0.3807	0	0	0.3529
3.4371	58.0652	0	0	0	0	0	0	0	0	1.059	1.1028	1.3073	0.4499	0	0.4497	0.7599	0.9321	0.9741	1.0275	1.2726	0.9094	0.4239	1.1492	1.0171	0.7584	1.142	0	0.6501	0.7401	0.5097	0.4739	0.797	0.5677	0.8241	0.2403	0.8985	0.5661	1.4381	0.9641	0.6745	0.4292	0.9831	1.0003	0.5345	1.6226	1.3199	1.9762	1.2587	1.4421
2.0669	56.228	0	0	0	0	0	0	0	0	0	0	0	0	0	0	0	0	0	0	0	0	0.1215	0	0	0	0	0	0	0	0	0	0	0	0	0	0	0	0	0	0	0	0	0	0	0	0	0	0	0
2.0848	56.1784	0	0	0	0	0	0	0	0	0	0	0	0	0	0	0	0	0	0	0	0	0	0	0.0937	0	0	0	0	0	0	0	0	0	0	0	0.0814	0	0.174	0	0	0	0	0	0	0	0	0	0	0
2.0733	56.1319	0	0	0	0	0	0	0	0	0	0	0	0	0	0	0	0	0	0	0	0	0	0	0.0935	0	0	0	0.0821	0	0	0	0	0	0	0	0	0	0.1708	0.1444	0	0	0	0	0	0	0	0	0	0
2.0712	56.0589	0	0	0	0	0	0	0	0	0	0	0	0	0	0	0	0	0	0	0.1743	0	0	0	0	0	0	0	0	0	0	0	0	0	0	0	0	0	0	0	0	0	0	0	0	0	0	0	0	0
2.2733	56.0486	0	0	0	0	0	0	0	0	0	0	0	0	0	0	0.2811	0	0.215	0.0936	0	0.2627	0.1479	0	0.154	0	0.2785	0.156	0.112	0.1539	0	0.1786	0	0.1182	0	0.3332	0	0	0	0	0	0.1015	0.3017	0	0	0	0	0	0	0
2.0734	56.0244	0	0	0	0	0	0	0	0	0	0	0	0	0	0	0	0	0	0	0.1776	0.0727	0	0	0	0	0.1416	0	0	0	0	0	0	0	0	0.1744	0	0	0	0	0	0	0	0	0	0	0	0	0	0
2.0659	55.9674	0	0	0	0	0	0	0	0	0	0	0	0	0	0	0.1249	0.094	0	0.1074	0	0.081	0	0	0	0	0.1376	0	0	0	0	0	0	0	0.1324	0	0.0878	0	0	0.1474	0	0	0.1764	0	0	0	0.1287	0	0	0
2.0772	55.8738	0	0	0	0	0	0	0	0	0	0	0	0	0.1129	0.1127	0	0.1131	0	0	0	0	0	0	0	0	0	0	0	0	0	0	0	0	0	0.1354	0	0.0751	0.1847	0	0	0	0.1919	0	0	0	0	0	0	0
0.4932	742.145	0	0	0	0	0	0	0	0	0	0	0	0	0	0	0	0	0	0	0	0.0882	0	0	0	0	0	0	0	0.0302	0.0577	0.0445	0	0.0442	0.0625	0	0	0	0	0	0	0.0449	0	0	0	0	0	0	0	0
2.06	741.563	0	0	0	0	0	0	0	0	0	0	0	0	0	0	0	0	0	0.1915	0	0	0.3191	0	0.1434	0	0	0	0.1264	0	0.0527	0	0	0	0	0	0	0	0	0.1066	0	0	0	0	0	0	0.0757	0	0	0
3.0321	740.662	0	0	0	0	0	0	0	0	0	0	0	0	0	0	0.121	0	0	0	0	0	0	0	0	0	0	0	0	0	0	0	0	0	0	0	0.0918	0	0	0	0	0	0	0	0	0	0	0	0	0
0.4255	740.625	0	0	0	0	0	0	0	0	0.2274	0	0	0	0	0	0	0	0	0	0	0	0	0	0.2716	0	0	0	0	0	0	0	0	0	0	0	0	0	0	0.2557	0	0	0	0	0	0	0	0	0.4271	0
2.0606	740.564	0	0	0	0	0	0	0	0.0756	0	0.2414	0	0.3275	0.2237	0	0.314	0.3782	0.3646	0.0682	0.4138	0.1786	0.1908	0	0.1935	0	0.489	0.3596	0	0.1443	0	0.2149	0.0919	0	0.3465	0.4469	0.2084	0.1086	0.5348	0.2532	0.1966	0	0.5456	0.2919	0	0.5101	0	0	0	0.5455
0.6415	740.462	0	0	0	0	0	0	0	0.3532	0.2975	0.2838	0	0	0.1497	0	0.2474	0	0.1428	1.2054	0	0.1528	0.2899	0.1464	0.588	0.3225	0.4916	0.0786	1.2076	0.1002	0.4862	0.3709	0	0.2948	0.1292	0.2143	0.1351	0	0.0916	0.19	0.2344	0.0847	0	0	0	0	0.268	0	0.1668	0
2.0599	739.564	0	0	0	0	0	0	0	0.289	0.2211	0	0.2766	0.2262	0.3236	0.302	0.3029	0.3721	0.1411	0.3693	0.1593	0.2588	0.261	0.1842	0.2829	0	0.4677	0.3668	0	0.1509	0	0.159	0.1354	0	0.2866	0.3725	0.1627	0.1547	0.105	0.1847	0.259	0.0842	0.5707	0.4295	0.2128	0.1144	0.2941	0.2675	0	0.4177
2.0567	738.566	0	0	0	0	0	0	0	0.1494	0.2748	0.2543	0.2604	0.3714	0.2956	0.1876	0.0922	0.3163	0.1733	0.2887	0.433	0.1777	0	0.0893	0.2407	0	0.4052	0.4996	0.2401	0.1182	0	0.2071	0.1499	0.1179	0.2285	0.3445	0.2333	0.1578	0.4828	0.4097	0.2294	0	0.2472	0.3556	0	0.599	0.4194	0.23	0.2104	0.6733
2.9424	738.52	0	0.0487	0	0.5124	1.9904	1.3237	0	0.1479	0	0.2203	0.1734	0.6122	0	0	0	0.013	0	0	0.2511	0.0461	0.1213	0	0.1302	0	0.079	0	0.4637	0.0716	0	0.2307	0.1212	0.2071	0	0.6684	0.0454	0.224	0.7163	0.0716	0.494	0.0954	0	0	0	0	0.5402	1.1517	0	0
2.4123	738.449	0	0	0	0	0	0	0	0	0	0	0	0	0	0	0	0	0	0.1619	0	0	0.0244	0	0	0	0	0	0	0	0	0.1513	0	0	0	0	0	0	0	0	0	0	0	0	0	0	0	0	0	0
1.8806	738.235	0	0	0	0	0	0	0	0.1066	0.2184	0.0968	0.2335	0.3132	0.2388	0.2717	0.2283	0	0.2531	0	0.3457	0.1405	0	0	0	0.1719	0.2472	0.1328	0.1977	0.0987	0.1398	0.0857	0.0528	0.0683	0.1428	0.1761	0.1206	0	0.5671	0.1759	0.1903	0.1926	0.3149	0	0.2545	0	0.169	0.2007	0.2986	0.3466
0.5038	738.12	0	0	0	0	0	0	0	0	0	0	0	0	0	0	0	0.1079	0.1253	0	0	0	0	0	0	0	0	0	0	0.0434	0	0	0	0	0	0	0	0	0	0	0	0	0	0	0	0	0	0	0	0
2.0642	737.567	0	0	0	0	0	0	0	0	0.1966	0	0	0.1887	0.1872	0	0.092	0.1943	0.1489	0.168	0.1572	0	0.1966	0.1123	0.1452	0	0.1563	0.2106	0.1217	0.0668	0	0	0.1071	0.1331	0.1734	0.3579	0.1935	0.1229	0.2673	0.2498	0	0	0.2243	0	0	0.3289	0.2556	0	0	0.2454
0.4366	736.54	0	0	0	0	0	0	0	0	0	0	0.3359	0	0	0	0	0	0	0	0	0	0	0	0	0	0	0	0	0	0	0	0	0	0	0	0	0	0.5373	0	0	0	0	0.4161	0.4576	0.6572	0	0.5581	0.4282	0
2.095	736.546	0	0	0	0	0	0	0	0	0	0	0	0	0	0	0	0.1173	0	0.0863	0	0	0.1018	0	0	0	0	0	0	0	0	0	0	0	0	0	0	0	0	0.1621	0	0	0.2472	0.1438	0.4177	0	0	0.4203	0.1227	0
1.7517	736.527	0	0	0	0	0	0	0	0	0	0	0	0	0	0	0	0	0	0	0	0	0	0	0	0	0	0	0	0	0	0	0	0	0	0	0	0	0	0	0	0	0	0.417	0	0	0	0	0	0
1.8467	377.146	0	0	0	0	0	0	0	0.7227	0.6728	0.6113	0.6601	0.6076	0.1142	0.8614	2.8676	0.691	0.8517	2.1743	1.0919	0.5227	0.2651	0.8517	0.8959	0.3627	0.808	1.3689	0.3143	0.4295	0.3425	1.4503	0.283	0.9931	0.31	3.8466	0.925	0.1137	0	0.5033	0.4397	0.2583	0.762	1.978	0.6609	0.3648	1.1898	0.6133	0	0
2.2174	377.142	0	0	0	0	0	0	0	0	0	0	0	0	0	0	0	0	0	0	0	0	0	0	0	0	0	0	0	0	0	0	0	0	0	0	1.8797	0	0.4713	0	0	0.1028	0	0	0	0	0	0	0	0
0.7183	377.136	0	0	0	0	0	0	0	0	0	0	0	0	0	0	0	0	0	0	0	0	0	0	0.1968	0.0751	0	0	0	0.143	0	0	0.1951	0	0	0	0	0	0	0	0	0.2727	0	0	0	0	0	0	0	0
0.4709	377.132	0	0	0	0	0	0	0	0	0	0	0	0	0	0	0	0	0	0	0	0	0	0	0	0.3164	0	0	0	0	0.482	0	0	0	0	0	0	0	0.1671	0	0	0	0	0	0	0	0	0	0	0
0.4443	377.07	0	0	0	0	0	0	0	0	0	0	0	0	0	0	0	0	0	0	0	0.1465	0	0	0	0	0	0	0	0	0	0	0	0	0	0	0	0	0.1986	0	0	0	0	0	0	0	0	0	0	0
0.4526	376.308	0	0	0	0	0	0	0	0	0	0.2735	0.1755	0	0	0.2193	0	0.3766	0	0.3886	0.4811	0.0602	0	0.1531	0	0	0.1371	0.7487	0.1247	0.0637	0	0.2129	0.6348	0.1368	0	0.1197	0	0.7312	0.1433	0.9003	0	0.3629	0	2.0369	0	0.6272	0.1887	0.4898	2.1976	0
0.9279	376.21	0	0	0	0	0	0	0	0	0	0	0	0	0	0.1567	0.1447	0	0	0.1928	0	0	0	0	0	0	0	0	0.2369	0	0	0.1622	0	0	0	0	0	0	0	0	0	0	0	0	0	0	0	0	0	0
3.2842	376.107	0	0	0	0	0	0	0	0	0	0	0.1294	0	0	0	0.0502	0	0	0	0	0	0	0	0	0	0.0632	0	0	0	0	0	0.2035	0.0075	0.2175	0.3071	0	0.1282	0.3115	0.0752	0	0.2413	0	0	0	0	0	0	0	0
0.4219	376.082	0	0	0	0	0	0	0	0.1984	0.1804	0.135	0.1466	0.1578	0.1567	0.6084	0.2006	0.1297	0.0826	0.2537	0.1021	0.2867	0	0	0.1858	0.0747	0.0959	0	0	0.1059	0.1406	0	0	0.0478	0	0.7456	0.3538	0	0	0.0941	0.1758	0.2247	0.5662	0.1601	0	0	0.2582	0	0.2971	0
3.4399	375.323	0	0	0.6398	27.7401	0.2535	20.7898	31.902	0	0	0	0	0	0.1562	0.0038	0	0	0	0	0	0	0	0	0	0	0	0	0	0	0	0	0	0.0003	0	0	0	0	0	0	0	0	0	0	0	0	0	0	0	0
1.1835	375.322	0	0	0	36.7275	55.0955	0	0	0	0	0.3561	0	0.8356	1.3484	0	0	0	0	0	0	0	0	0	0	0	0	0	0	0	0	0	0	0	0	0	0	0	0.2948	0	0	0	0.2986	0	0.7397	0.5947	0.5451	0.7489	1.2503	0.8306
0.8534	375.321	0	0	0	0	0	0	0	0	0	0	0.2076	0.3198	1.6265	0	0	0	0	0	0	0	0	0	0	0	0.191	0	0	0	0	0	0	0	0	0	0	0	0.3677	0	0	0	0	0	0	0.4094	0.63	0.5744	0.355	0
2.2472	375.321	0	0	0	43.4362	0	0	30.3932	0.0655	0.0371	0.1416	0.5192	0.9406	2.1984	0.2692	0.143	0.2335	0	0.1413	0	0.1782	0.2274	0.1582	0.0422	0	0	0.1091	0.0633	0	0.174	0.2621	0.1317	0.2004	0.3284	0.4067	0.233	0	0.773	0.5045	0.2961	0.273	0.5885	0.2062	1.3777	2.3197	0.0758	1.6396	0.586	1.5788
2.7672	375.32	0.1727	0	0	0	5.0839	0	44.2846	0	0	0	0	0.1079	0.0437	0	0	0	0	0	0	0.0292	0.4564	0	0	0	0	0	0	0	0.0091	0	0	0	0.0766	0	0	0	0	0	0.0034	0.0028	0	1.2335	0	0	0	0	0	0
0.6071	375.32	0	0	0	0	82.6472	39.6813	0	0	0.273	0.216	0	0.6112	0.6463	0	0	0	0	0	0	0	0	0	0	0	0	0	0	0.0603	0	0	0	0	0	0	0	0	0	0	0	0.0324	0.4101	0.158	0.2505	2.2278	0.2907	0.9065	1.7961	0.7467
2.9127	375.32	0	0	0	4.3279	0	0	0	0	0	0	0	0	2.8548	0	0	0	0	0	0	0	0	0	0.0079	0	0	0.1782	0	0	0	0	0	0	0	0.4236	0	0	0	0.0621	0	0	0	0.6319	0.1434	0.4577	0.0968	0	0.1205	0
0.4829	230.012	0	0	0	0	0	0	0	0	0	0	0	0	0	0	0	0	0	0	0	0	0	0	0	0	0	0	0	0	0	0	0	0.2024	0.0721	0	0	0	0	0	0	0	0	0	0	0	0	0	0	0
0.5114	229.176	0	0	0	0	0	0	0	0	0	0.9686	0.55	0	0	0.1268	0	0	0	0	0.1749	0.4142	0.0615	1.1064	0	0.4905	0.1385	0.3151	0.3107	0	0.2415	0.0483	0.2188	0	0	0	0.1996	0	0	0	0	0.1422	0.4712	0	0	0.1197	0	0	0.3374	0
0.7605	229.152	0	0	0	0	0	0	0	0	0	0	0	0	0	0	0	0.87	0	0	2.0223	0	0	0	0	0.8928	0.2967	0	0	0	0.199	0.1944	0	0	0	0	0	0.029	0.4703	1.0495	0	0.0601	1.3812	0	0	0.1221	0.1603	0.9304	0.3131	0.2241
2.0973	229.151	0	0	0	0	0	0	0	0	0	0	0	0	0	0	0	0	0	0	0	0	0	0	0	0	0	0	0	0	0	0	0	0	0	0.052	0	0	0	0	0.2618	0	0	0	0	0	0	0	0	0
3.508	229.145	0	0	0	0	32.1847	0	3.6618	0.0692	0	0.6548	0	0.0376	0	0	0.8181	1.4819	0	0	1.0138	0	0.3176	0.0127	0	0	0.4723	0	0.7028	0	0.5643	1.4496	0	1.0669	0.3161	2.311	0	0	0.481	0	0.9321	0.268	0.5527	0.2518	0	0.1571	0.3148	0	0	0
0.4973	229.144	0	73.6275	0	13.9695	37.4106	0	0	0	0	0	0	0	0	0	0	0	0.1808	0.0386	0	0	0	0	0.4515	0.1443	0	0.5795	0.2187	0	0	0.1978	0	0.3493	0	0	0	0	0.1147	0	0.3801	0	0	0.2376	0	0	0	0	1.5694	0
1.8613	229.143	0	0	0	0	32.4545	43.4211	0	0	0	0	0	0.4907	0.179	0	0	0	0	0	1.3131	1.0065	0	0	0.1058	0.2619	0	0	0	0.0673	0	0	0.0466	0	2.2051	0	0	0	0.3155	1.0645	0.1031	0.1696	0	0	0	0	0.5616	0	0	0
2.9204	229.143	0	0	0	0	0	0	0	0	0.1157	0.5782	0.3573	0	0	1.5526	0	0	0	0	0.4972	0.8061	0	1.5013	0.7002	1.52	0	0.1248	0.314	0.1138	0.2383	0	0.0893	1.3822	0.2581	3.0179	0.2653	0	1.7803	2.3771	0.1422	1.0884	1.6021	0	0.4456	0.2944	0.6539	0.0552	0.7116	0.1884
1.5509	229.143	0	0	0	0	0	0	0	5.0655	4.5549	1.9703	4.3893	2.8534	0	2.0743	0	0	4.293	2.7224	6.9684	5.1498	8.0922	0	8.0824	7.5326	5.8574	0	1.8721	2.9806	0	0.3582	4.1794	0	2.0282	3.8483	5.8973	1.3492	4.8458	0	8.4861	3.4931	0	0.0836	2.9553	7.9376	0	3.5889	7.2156	1.3793
2.772	229.143	0	0	0	27.3515	0	0	23.4891	0	0	0.825	0.2172	0.7376	0	0.3315	2.5348	2.7843	0.9112	0	0.1855	0.2262	0.9055	0.2482	0.3795	0.4523	0.2353	0.6462	0.4806	0.7913	0.135	0.1982	0.8542	2.5054	0.2018	0.2512	0.3057	2.0422	0	0.1643	0	0.5772	3.4081	1.2805	0	0.3108	0.6115	0.1686	0	0
0.2971	229.142	0	0	0	24.082	0	0	36.888	0	0	0.1213	0	0	0	0	0	0	0	0	0	0	0	0	0	0.0651	0	0	0	0	0	0.0372	0	0	0.0581	0	0	0	0.1091	0.1292	0	0.9289	1.2604	0	0.6596	0.0931	0	0	0	0
1.2973	229.142	0	41.4384	0	34.6651	0	41.9166	0	0	0.213	0.3791	0.7517	0.9534	1.6078	0	0.4508	0.4249	1.1475	0.357	0.8617	0.1013	0	0.662	0.1078	0.5746	0.0901	0	0.2308	0.1748	0.2693	0	0.2876	0.2908	0.5549	0.8389	0.337	0.2149	0	0.9304	0.0851	0.3053	0.1042	1.0387	0.4159	0	0.8797	0	2.185	0.3115
2.5104	229.141	0	0	0	0	0	0	0	0.9855	0.037	1.8339	1.3674	0	0	0.2164	0	0	0	1.1624	0	0	0	0	1.595	0.0426	0.3263	0	0	0.1892	0.0291	0	0.0999	0.4758	0	0	0	0	1.2979	0.9915	0.818	0.5517	0	0.0646	0.3732	0	0	0	0	0
3.2525	229.141	0	0	71.0409	0	0	33.1821	0	0	0	0.4336	0	0	0.039	1.0893	0	0.7076	0	0.3093	0	0	0	0.6866	0	0.0872	0.0452	0	0.2393	0.6483	0	0.0017	0	0	0	1.8401	0.1178	0	0	0	0.1668	0	0.6007	0	0	0	0	0	0	0
2.2016	229.141	0	0	0	34.3449	92.5479	0	0	0	0.1068	3.8142	0.0813	0.024	0.0597	3.3114	0	0	0.3464	0.2622	0	0	0	0	0.7058	0	1.9542	0.0251	0.6229	0.074	0	1.1673	0.053	0	1.0802	0	0.2165	0.2837	0.4314	2.535	0.3361	0.1319	0	0.2606	0.9496	0.1328	0.6847	0.3367	0.3961	0
1.0156	229.107	0	0	0	0	45.2824	0	0	16.6969	17.5758	16.5575	17.874	16.9274	16.4524	0.6186	2.2151	0	1.8328	0.25	0.9542	2.0721	0.601	1.3852	1.1593	1.2459	1.2898	2.1786	0.9745	0.9863	0.878	291.108	0.2774	0.1401	0.5508	0	0.8365	0.4532	1.3216	0.753	2.8151	0.7697	0	0	1.1063	1.5014	0.5335	3.8253	0.1839	0
3.2715	61.0401	0	0	0	0	0	0	0	0.288	0.2261	0	0	0	0	0.4463	0	0.1883	0.1873	0.1274	0.3654	0	0	0.2413	0	0.1554	0.2973	0	0.6866	0	0	0.1963	0	0	0	0.2232	0.0857	0.1308	1.1944	0	0	0.1726	0	0	0	0	0	0	0	0
2.4327	61.0393	0	0	0	0	0	0	0	0	0	0	0	0	0	0	0	0	0	0	0	0	0	0	0	0	0	0	0	0	0.1698	0	0	0	0	0	0	0	0.2311	0	0	0	0	0	0	0	0	0	0	0
2.0863	60.6329	0	0	0	0	0	0	0	0	0	0	0	0	0	0	0.0856	0	0	0	0.1213	0	0	0	0	0	0	0	0	0	0	0	0	0	0	0	0.0756	0	0	0	0	0	0	0	0	0	0	0	0	0
3.0889	60.5394	0	0	0	0	0	0.5344	0	0	0	0.035	0	0	0	0.0149	0	0.118	0	0	0.1131	0	0.1168	0.0581	0.053	0.0466	0.0662	0.0837	0	0.0544	0	0.1216	0.0496	0	0.1097	0.0564	0	0	0	0	0.0233	0	0	0.0857	0	0	0.0767	0	0	0
3.0889	60.4499	0	0	0	0	0	0	0	0	0	0.0666	0	0.0479	0.0213	0	0.1049	0.1575	0	0.0805	0.1531	0.1036	0.1512	0	0.0662	0	0.0764	0.1427	0	0.074	0	0	0.0659	0	0	0.0882	0	0	0.0208	0	0	0	0.1479	0.1298	0	0.0495	0.0657	0	0.0479	0
3.1025	60.3672	0	0	0	0	1.8808	0.0982	0	0	0	0	0	0.0654	0	0	0.0896	0.1444	0	0.0741	0	0	0	0.1007	0	0	0	0	0	0.0734	0	0.1175	0.0546	0	0.0841	0.0621	0.2325	0	0	0	0	0.0165	0.1503	0.0856	0	0	0	0	0	0
3.0998	60.315	0	0	0	0	0	0	0	0	0	0	0.0476	0	0	0	0	0	0	0	0	0.0613	0.2092	0	0	0	0	0	0	0.0755	0.1683	0.1193	0.0661	0	0	0	0	0	0	0.084	0	0	0.1327	0	0	0	0	0	0.0112	0
3.097	60.2529	0	0	0	0	0	0	0	0	0	0	0.0542	0.0577	0.0835	0	0.1259	0.178	0.0672	0.0908	0.1342	0.1507	0.1615	0.1071	0	0.0468	0.0908	0.1617	0	0.0781	0.1482	0	0.0877	0.1109	0.0958	0.121	0.182	0.1672	0	0.1046	0	0	0.1638	0	0	0	0.0766	0	0	0
3.1049	60.1868	0	0	0	0	0	0	0	0	0	0	0	0	0	0	0	0	0	0.093	0	0	0	0	0	0	0	0	0	0	0.1773	0.0895	0.0634	0.1365	0.0828	0	0	0.0877	0	0	0	0	0	0	0	0	0	0	0	0
2.9853	60.0828	0	0	0	0	0	0	0.6253	0.427	0.4445	0.4182	0.1673	0.4156	0.39	0.5984	0.5461	1.0172	0.5097	0.4913	0.724	0.6425	0.166	0.7135	0.3177	0.0638	0.7475	0.7586	0.3328	0.446	0.6492	0	0.3382	0.5796	0.5018	0.5872	0.6701	0.4681	0.8469	0.4329	0.4288	0.6388	0	0.1983	0.2852	0.4268	0.4511	0.2787	0.2512	0.0929
1.4619	60.0811	0	0	0	0	0	0	0	0	0	0	0	0	0	0	0	0	0	0	0.2028	0	1.0081	0	0.4486	0.4595	0.0872	0	0	0.1209	0	0	0.0416	0	0	0	0.4251	0.2519	0	0	0.4539	0.139	0	0	0	0	0	0	0	0.5486
1.8134	60.081	0	0	0	0	0	0	0	0	0	0.3064	0.3127	0.1556	0.359	0	0	0	0	0	0	0	0	0	0	0.2789	0.5158	0.5508	0	0.4569	0	0	0.4809	0	0.4587	0.4703	0.5074	0.6914	0	0	0.2331	0	0	0.6635	0	0	0.1685	0	0	0
2.0566	60.081	0	0	0	0	0	0	0	0	0	0	0	0	0	0	0	0	0	0	0	0	0	0	0.2253	0.2416	0	0.2552	0	0.1373	0	0.1383	0.2173	0	0	0	0	0	0.2423	0	0.2274	0	0	0	0	0	0	0	0	0
1.6703	60.081	0	0	0	0	0	0	0	0.4361	0.5969	0.4995	0.1333	0.7604	0.9132	1.1001	0.9001	1.1937	0.565	0.3529	0.7357	0.5837	0.1033	0.5006	0.1774	0.0771	0.7981	0.6742	0.3042	0.7705	0.5318	0.4488	0.4093	0.9547	0.8742	1.5461	1.0538	0.357	0.8375	0.7177	0.4155	0	1.9303	0.5672	0.4296	0	0.5121	0	0	0
2.4237	60.0808	0	0	0	0	0	0	0	0.3557	0.3057	0.3494	0.3424	0.3405	0.3198	0	0	0.1162	0	0.2793	0.406	0.3208	0.2271	0.3809	0.3617	0.4262	0.5655	0.5488	0	0.2965	0.3038	0.4365	0.4729	0.4073	0.3549	0.2765	0.5084	0.3466	0.2988	0.3907	0.6044	0.2785	0	0.3552	0.3958	0	0.3287	0	0	0
2.6966	60.0559	0	0	0	0.2015	0	0	0	0.3313	0.3827	0	0	0	0	0	0	0.3437	0	0.2154	0	0	0	0.3971	0.5411	0.2722	0.3318	0.2843	0.3097	0.147	0.2399	0.2812	0.3112	0.2848	0.2488	0.391	0	0.1746	0.5257	0.436	0	0	0.2992	0	0	0	0	0	0	0
3.0889	752.632	0	0	0	0.8166	0	0	0	0.2935	0.2574	0.2306	0	0.2358	0.2299	0.2044	0.213	0.3036	0.1926	0.2373	0.1794	0.1845	0.0839	0.2029	0.1641	0.1396	0.1022	0.3142	0.0871	0.1037	0.168	0.2107	0.1632	0.2701	0.1955	0.3395	0.1445	0.1957	0.2822	0.3245	0.1842	0.1504	0.4622	0.3176	0.1944	0.4408	0.3468	0	0.1971	0.339
2.6921	752.227	0	2.2358	0	0	0	0	0	0.0666	0.0748	0.0289	0.0311	0	0	0.157	0	0	0	0.0625	0.0055	0	0.0678	0	0.0937	0.0594	0.1098	0	0	0.0066	0	0.0196	0.0848	0	0	0.0805	0	0	0.0321	0	0	0	0	0	0	0	0.0088	0	0	0
0.5167	750.483	0	0	0	0	0	0	0	0	0	0	0	0	0	0	0	0	0	0	0	0	0	0	0	0	0	0	0	0	0	0	0	0.1156	0	0	0	0	0	0.6165	0	0	0	0	0	0	0	0	0	0
0.7691	750.458	0	0	0	0	0	0	0	0	0	0.1329	0.1674	0	0	0	0	0	0	0	0	0	0	0	0	0	0	0	0	0	0	0	0	0	0	0	0	0	0	0	0	0	0	1.2815	0	0	0.3035	0	0	0
0.5652	750.182	0	0	0	0	0	0	0	0	0	0	0	0	0	0	0	0	0	0	0	0	0	0	0	0	0	0	0	0.0407	0	0	0.0357	0	0	0	0	0	0	0	0	0	0	0	0	0	0	0	0	0
0.5444	750.102	0	0	0	0	0	0	0	0.108	0.1091	0.1319	0.1139	0.1112	0	0.1193	0	0.0644	0.0698	0	0	0.0477	0	0	0	0.0519	0	0	0.1054	0	0	0.0624	0	0.0739	0	0	0.049	0	0	0.0611	0	0	0	0.1225	0.1454	0	0	0	0.1722	0.1052
1.5337	748.541	0	0	0	0	0	0	0	0.8405	0.9898	1.1151	2.6419	2.2581	2.3167	1.2716	0.2917	0.2107	0.3844	0.4977	0.1662	0.2199	0.1255	0.6858	0.8451	0.3985	0.5056	1.3077	0.6814	0.1491	0.1038	0.84	0.9618	0.1243	0.1738	1.9797	0.1705	0.2659	2.7623	0.1534	0.768	0.2119	6.5703	0.6916	1.1808	1.7846	2.342	0	0.894	0.5021
0.4707	748.532	0	0	0	0	0	0	0	0.21	0	0	0	0	0	0	0.097	0	0.0911	0	0	0.0806	0	0	0	0.0616	0	0	0.1273	0.0981	0	0	0	0.0707	0	0.1693	0.1374	0	0	0.2449	0	0	0.1201	0.1906	0	0	0	0	0	0
0.4548	746.559	0	0	0	0	0	0	0	0.1827	0	0	0	0	0	0	0	0	0	0	0	0	0	0	0	0	0	0	0	0	0	0	0	0.4534	0	0	0	0	0	0.4179	0	0	0	0	0	0	0	0	0	0
1.9334	746.498	0	0	0	0	0	0	0	0	0	0	0	0	0.1667	0	0	0	0	0	0	0	0	0	0	0	0	0.1302	0	0	0	0	0	0	0	0	0.0762	0	0	0.1007	0.1113	0.0507	0.1785	0	0	0	0.1474	0	0	0
1.2058	745.152	0	0	0	0	0	0	0	0	0	0	0	0	0	0	0	0	0.0513	0	0	0	0	0	0	0	0	0	0	0.1374	0	0	0.0601	0	0	0	0	0	0	0	0	0	0	0	0	0	0	0	0	0
0.5435	745.146	0	0	0	0	0	0	0	2.3638	2.2147	2.1177	2.3471	2.3565	2.3593	2.4246	2.6569	3.8481	2.0813	2.3292	0	1.8712	2.2854	0	0	0.6264	2.0007	0	1.6747	2.4706	2.1085	2.6114	2.5491	2.371	2.3434	0	2.4372	2.5819	0	1.592	0	3.2692	1.584	3.0872	6.2999	0	1.6793	0	2.6234	0.7059
0.5635	743.689	0	0	0	0	0	0	0	0	0	0	0	0	0	0	0	0	0	0	0	0	0	0	0	0	0	0	0	0.0396	0	0	0.044	0	0	0	0	0.0322	0	0	0	0.0527	0	0	0	0	0	0	0	0
0.5032	743.164	0	0	0	0	0	0	0	0	0	0	0	0	0	0	0	0	0.1123	0	0	0	0	0	0	0	0	0	0	0.2403	0.0655	0	0	0	0	0	0	0.0514	0	0	0	0.0443	0	0	0	0	0	0	0	0
0.439	742.61	0	0	0	0	0	0	0	0	0	0	0	0	0	0	0	0	0	0	0.3499	0	0	0	0	0	0	0	0	0	0	0	0	0	0	0	0	0	0	0	0	0	0	0	0.354	0.3884	0.0701	0.3224	0	0.4514
2.0447	742.561	0	0	0	0	0	0	0	0	0	0	0	0	0	0	0	0	0	0	0	0	0	0	0	0	0	0	0	0	0	0	0	0	0	0	0	0	0.1718	0	0	0	0	0	0	0	0	0	0.1281	0
0.9343	379.173	0	0	0	0	0	0	0	0	0	0	0	0	0	0	0	0	0	0	0.2631	0.382	0	0	0	0	0	0	0	0.1885	0	0	0	0	0	0	0	0	0	0.4082	0	0	0	0	0	0	0	0	0	0
3.078	379.141	0.429	0	0	0.0811	1.5893	0.4769	0	0	0	0.0025	0.3128	0	0	0.2731	0.3389	0	0	0	0.0438	0	0	0.1488	0.0722	0	0	0.4408	0.1204	0	0	0	0.1957	0	0	0	0	0	0	0.2636	0	0.1295	0	0	0	0	0	0	0	0.1788
0.7153	379.137	0	0	0	0	0	0	0	0	0	0	0	0	0	0	0	0	0	0	0	0	0	0	0	0	0	0	0	0	0	0.1793	0.0759	0	0	0	0.1728	0	0.1074	0	0	0	0	0	0	0	0	0.3333	0	0.309
2.2692	379.136	0	0	0	0	0	0	0	1.1211	1.1186	1.05	1.1441	1.0702	1.1002	1.2319	0.4944	0.2676	1.026	4.0579	1.0566	0.4116	0.4183	2.3603	3.138	1.9008	1.8143	1.5264	4.7372	0.6585	1.9608	2.7333	1.2621	0.5559	1.7631	2.0543	0.3658	0.6403	1.3074	0.3049	2.2417	1.322	0.3713	0	0	0.338	2.384	0.437	0.2296	0.222
2.4602	379.117	0	0	0	0	0	0	0	0	0	0	0	0	0	0	0	0	0	0	0	0	0	0	0	0.1153	0	0	0	0	0.2893	0	0	0	0	0	0	0	0	0	0	0	0	0	0	0	0	0	0	0
0.5043	379.085	0	0	0	0	0	0	0	0	0	0	0	0	0	0	0.0874	0	0	0	0	0.6662	0	0	0.3275	0	0	0	0	0	0	0.1196	0	0	0	0	0	0	1.7368	0	0.131	0.1141	0	0	0	0	0	0	0.1868	0
1.2665	379.041	0	0	0	0	0	0	0	0	0	0	0	0	0	0	0	0	0	0	0.2012	0	0	0	0	0	0	0	0	0	0.0413	0	0	0	0	0	0	0	0	0.1262	0	0.1157	0	0	0	0	0	0	0	0
3.1255	378.899	0	0	0	0	0	0	0	0	0.0834	0.0871	0.0831	0	0	0	0.0193	0	0	0	0.0461	0	0	0	0.2126	0.2167	0	0	0	0	0	0.1273	0	0	0	0.156	0	0	0	0	0	0.014	0	0.0972	0.0375	0	0.1746	0	0.0279	0.0651
3.0892	378.805	0	0	0	0	0	0	0	0.6807	0.6859	0.6623	0.6996	0.6824	0.69	0.4285	0.6627	0.834	0.4929	0.6441	0.914	0.6476	0.8165	0.6478	0.6082	0.4543	0.6881	0.9021	0.3107	0.3451	0.6687	0.6722	0.438	0.6366	0.659	0.7203	0.7997	0.5559	0.5964	0.6294	0.5129	0.3069	0.9598	0.9367	0.5196	0.9797	0.7062	0.4002	0.6566	0.8366
2.2515	378.176	0	0	0	0	0	0	0	0	0	0	0	0	0	0	0	0	0	0	0	0	0	0	0	0	0	0	0	0.0939	0	0	0.0483	0	0	0	0	0	0	0	0	0	0	0	0	0	0	0	0	0
3.4706	378.106	0	0	0	0	0	0	0	0	0	0.0287	0	0	0	0	0	0	0.0034	0	0	0.0037	0	0	0.2705	0.088	0	0	0	0	0	0.0125	0	0	0	0	0	0.0108	0	0	0	0	0	0	0	0	0	0	0	0
0.834	377.241	0	0	0	0	0	0	0	0	0	0	0	0	0	0	0	0	0.1484	0	0	0	0	0	0.3521	0	0	0	0	0	0	0.1901	0	0	0	0	0	0	0.1873	0	0	0	0	0	0	0	0	0	0	0
0.5919	377.198	0	0	0	0	0	0	0	0	0.1758	0	0	0	0	0	0.2887	0.272	0	0	0.1906	0.2008	0	0.2658	0	0	0	0	0.1238	0.1626	0.1172	0	0	0	0	0.2663	0	0.1877	0.3687	0	0	0	0	0	0	0	0	0	0	0
0.917	377.178	0	0	0	0	0	0	0	0.2602	0.2635	0.2241	0.2992	0.343	0.281	0.1166	0.2752	0.2493	0.5755	0.1686	0.1451	0.1346	0	1.4844	0	0	0.18	0.6122	0.1568	1.032	0.275	1.8803	0.2313	0.3129	0.3441	0.2385	0.1868	0.2496	0.9863	0.6783	0.169	0	0.2195	0	0.264	0.5016	0.3286	0	0	0
2.4679	377.171	0	0	0	0	0	0	0	0	0	0	0	0	0	0	0	0	0.0937	0	0	4.6624	0	0	0	0	0	0	0	0	0	0	0	0	0	0	0	0	0	0	0	0	0	0	0	0	0	0	0	0
1.4688	377.155	0	0	0	0	0	0	0	0	0	0	0	0	0	0	0	0.4989	0	0.1071	0	0	0	0	0	0	0	0	0	0	0	0	0	0	0	0.1664	0	0.0804	0	0	0	0	0.1591	0	0	0	0	0	0	0
2.6317	231.084	0	0	4.9854	2.3523	1.4908	1.1158	0.2927	37.393	36.5762	35.7858	37.5051	35.3867	33.6809	52.6632	18.5249	17.7857	31.1203	136.668	40.907	11.4393	24.8721	68.9091	81.4243	42.9493	64.5583	36.6154	92.6145	15.9553	65.4112	70.0061	35.2488	20.3225	54.1364	78.9643	19.8838	19.5064	39.6145	12.7003	47.7858	29.5463	24.3983	11.6133	13.0229	26.674	74.09	26.0508	10.636	23.6446
1.1914	231.083	0	0	0	0	0	0	0	1.7587	1.4661	1.7877	1.4088	1.3198	1.3243	1.5246	0	0	0.0517	0	0.8831	0	0	1.3208	5.4826	1.3	2.3671	0	1.0276	0.3749	0	0	0.6286	0.024	0.615	0	2.7088	0.713	2.0826	1.2779	1.1545	0.5598	0.3287	0	0	0	0	1.7623	0	0
0.8762	231.083	0	0	0	0	0	0	0	0	0	0.6443	0	1.0943	0	1.3057	1.8381	0.8789	1.8607	0.0354	1.6042	1.5471	0.8613	0.9543	0.963	0.648	0.7189	0.3344	0	0.3196	0.3508	0	2.1508	0.195	0.3982	3.6848	1.4097	1.7726	1.2903	0	0	0.564	3.4975	2.8736	0	2.734	1.867	0	1.2173	1.9339
1.7712	231.082	0	0	0	0	0	0	0	0	0	0	0.2426	0	0	0.5417	0.8352	0	0	0	1.4638	0.3799	0.2274	0	0	0	0.4616	0	0	0.224	0.3967	0	0.2094	0.7159	0.4488	0	0	0	0	0.6565	0	0	0	0	0.539	0	0	0	0	0.0654
2.2092	231.081	0	0	0	0	0	0	0	0	0	0	0	0	0	0.4626	0	0	0	0	0	0	0	0.3932	0	0.2069	0	0	0	0	0.2058	0	0	0	0.0618	0	0.3096	0	0	0.3001	0.0845	0.1019	0	0	0	0	0	0	0	0
2.8135	231.08	0	0	0	0	0	0	0	0.5306	0	0	0	0.1752	0	0	0	0	0	0	0	0	0	0	0	0	0	0	0	0	0	0	0	0	0	0	0	0	0	0	0	0.0582	0	0	0	1.6495	0	0	0	0
0.4942	231.038	0	0	0	0	0	0	0	0	0	0	0	0	0	0	0	0	0	0	0	0	0	0	0	0.1595	0	0	0	0	0	0	0	0	0.1448	0	0	0.0764	0	0	0	0	0	0	0	0	0	0	0	0
2.4335	231.037	0	0	0	0	0	0	0	0	0	0	0	0	0	0	0	0	0	0	0	0	0	0	0	0	0.6219	0.8598	0	0	0.3993	0.3641	0	0	0	0	0	0	1.1152	0	0	0.3268	0	0	0	0	0	1.3233	0	0
3.0193	231.037	0	0.5524	0	0	0	0	0.6291	0.1615	0.124	0	0.0481	0	0	0.3616	0	0	0.0454	0	0.8429	0.0324	0.099	0.244	0.433	0.4169	0.4202	0.929	0	0.4423	0.2298	0.457	0.1361	0	0.3588	0.1822	0	0.1304	0.1161	0	0.2663	0	0	0	0	0	0	0.3187	0	0
3.4871	230.186	0	0	0	0	0	0	0	5.761	5.3869	5.2684	5.9606	4.6764	4.0469	9.1881	5.9381	4.3248	5.8348	0	11.0144	5.1666	3.1037	6.0175	7.4619	4.7197	5.8844	7.5639	6.5808	9.3469	5.4917	5.427	3.3594	9.1929	6.3799	8.0731	3.3636	0	9.7507	7.5933	8.591	5.3682	5.4409	0	0	7.43	3.667	8.5773	2.2571	3.3143
3.1371	230.137	0	0	10.3955	8.3093	0	0	2.4884	0	0	0	0	0	0	0	0	0	0	0	0	0	0	0	0.0612	0	0	0	0.0286	0	0	0	0	0	0.2486	0	0	0	0	0	0	0.144	0	0	0	0	0.2276	0	0	0
0.9352	230.096	0	0	0	0	0	0	0	0	0	0	0	0	0	1.7909	0.3946	0	0.4522	0	0.901	0.4001	0.2817	1.7735	0.916	1.6167	1.0275	1.1786	0.3981	0.8249	0.7334	0	1.0573	0	0.9476	1.467	0.3307	0.7144	0.8004	0.5204	0.8914	0	0	0	0	0	0	0	0	0
0.6116	230.093	0	0	0	0	0	0	0	0.2292	0.3077	0	0.1786	0	0.1985	0.7524	0	0	0	0.1762	0	0	0	0.2042	0.887	0	0	0.542	0	0.3832	0	1.1534	0.3053	0.3731	0.6237	0.9101	0	0.1444	0	0	0	0	0	0	0	0	0.2157	0	0	0
1.6457	230.048	0	0	0	0	0	0	0	0	0	0	0	0	0	0	0	0	0	0	0	0	0	0	0	0	0	0	0	0	0	0	0	0	0	0	1.9341	0	0	0	0	0	0.8901	0.6229	0	0	0	1.1778	0	0.7392
1.1489	230.05	0	0	0	0	0	0	0	0	0	0	0	0	0	0	0	0	0	0	0	0	0	0.1309	0	0	0	0	0	0	0.3741	0	0	0	0	0	0	0	0	0	0	0	0	0	0	0	0	0	0	0.2985
0.6239	230.013	0	0	0	0	0	0	0	0.4282	0.4303	0.507	0.4507	0.4889	0.4402	0	3.056	0	0.9112	0.3637	0.1425	1.5169	0	1.4147	1.4473	0.1517	0.3514	1.2264	0.528	1.2299	0.3406	0.6111	0.2911	0.8934	0.6413	0.6204	0	0.1942	0.7352	0	0.5486	0.4486	0	0.7693	0	0.5819	0	0	0.5275	0
3.1057	67.905	0	1.7501	0	0	0	0.0206	0	0	0	0	0.0404	0	0	0	0	0	0	0	0.1335	0	0	0	0	0	0	0	0	0	0.0626	0	0	0.0683	0.0548	0	0.0868	0	0	0	0	0.0173	0	0	0.0215	0	0	0	0	0
3.1084	67.8576	1.27	0	2.5728	0	0	0	0	0	0	0	0	0.062	0	0	0	0	0	0	0	0.0855	0	0	0	0	0	0	0	0.0358	0.0896	0	0	0.0788	0.0185	0	0.097	0.1089	0	0	0	0	0.0922	0	0	0	0	0	0.0305	0.0413
0.4679	67.0552	0	0	0	0	0	0	0	0	0	0	0	0	0	0	0	0	0.2322	0	0.3557	0	0	0	0	0	0	0.4491	0	0	0	0	0	0.4564	0	0	0	0	0	0	0	0	0	0	0	0.5425	0	0	0.3567	0
2.093	67.0547	0	0	0	0	0	0	0	0.2777	0.5217	0	0.4792	0	0	0	0.0375	0	0	0.2585	0	0	0.332	0	0	0	0	0	0	0.2434	0	0	0	0	0	0	0	0	0	0	0	0	0	0	0.5871	0	0	0	0	0
1.6147	67.054	0	0	0	0	0	0	0	0	0	0	0	0	0	0	0	0	0	0	0	0	0	0.5228	0	0	0	0	0	0	0	0	0	0	0	0	0	0	0	0	0	0	0	0	0	0	0	0	0	0.7286
0.6781	67.0538	0	0	0	0	0	0	0	0	0	0	0	0	0	0	0	0	0	0	0	0	0	0.2946	0	0	0	0	0	0	0	0	0	0	0	0	0	0	0	0	0	0	0	0	0	0	0	0	0	0
1.1566	67.052	0	0	0	0	0	0	0	0.4825	0	0	0	0	0	0	0	0	0	0	0	0	0	0	0	0	0	0	0	0	0	0	0	0	0	0	0	0	0	0	0	0	0	0	0	0	0	0	0	0.313
0.743	66.0338	0	0	0	0	0	0	0	0	0	0	0	0	0	0	0	0	0	0	0	0	0	0	0	0	0	0	0	0	0.0652	0	0	0	0	0.1273	0.0837	0	0	0	0	0	0	0	0	0	0	0	0	0
3.1091	65.6737	0	0	0	0	0	0	0	0	0	0	0	0.0291	0.0315	0	0	0	0	0	0	0.0642	0	0	0	0	0	0	0	0	0	0	0	0	0	0.017	0.0827	0.0554	0	0.0496	0	0	0	0.0053	0	0	0	0	0	0
3.1073	65.6216	0	0	0	0	0	0	0	0	0	0	0	0	0	0	0	0	0	0	0	0	0	0	0	0	0	0	0	0	0.0817	0	0	0.0695	0	0	0.0959	0.0621	0	0	0	0	0.0787	0	0	0	0	0	0	0
3.1041	65.4829	0	0	0	0	0.5735	0	0	0	0	0	0	0	0	0	0	0	0	0	0	0	0.0774	0	0	0	0	0	0	0	0.0851	0	0	0.0955	0.08	0	0.0843	0.0738	0	0	0	0	0.1362	0	0	0	0	0	0	0
3.107	65.4317	0	0	0	0	0	0	0	0	0	0	0	0.0251	0	0	0	0	0	0	0.1058	0	0	0	0	0	0	0	0	0	0	0	0.0415	0	0	0	0.1106	0.0817	0	0	0	0	0	0	0.017	0	0	0	0	0.011
3.1058	65.3658	0	0	0	0.1792	0	0	0	0	0	0	0	0	0.0312	0	0	0	0	0	0	0	0	0	0	0	0	0	0	0	0.0932	0	0	0.0783	0.0797	0	0	0.0652	0	0	0.0082	0	0.0914	0	0	0	0	0	0	0
3.1132	65.2414	0	0	0.954	0	0	0	0	0	0	0	0	0	0	0	0	0.0779	0	0	0	0	0	0	0	0	0	0	0	0	0.0945	0	0	0.0735	0	0	0.0994	0.0766	0	0	0	0	0	0	0	0	0	0	0	0
2.0365	65.0388	0	0	0	0	0	0	0	0	0	0	0	0	0	0	0	0	0	0	0	0	0	0	0.2518	0.1652	0	0	0	0.2771	0.2073	0.3476	0.2281	0	0	0	0.2489	0.4972	0	0	0	0	0	0	0	0	0	0	0	0
0.5457	65.0387	0	0	0	0	0	0	0	0.4186	0.3042	0.2816	0.3072	0.2856	0.2938	0.3746	0.4295	0.4899	0.3209	0.3409	0	0.2678	0.3635	0	0	0.1505	0.2758	0	0.209	0.4097	0.3068	0.4179	0.3519	0.324	0.3473	0	0.3663	0.3406	0	0.2451	0	0.3736	0.3577	0.5505	0.7486	0	0.2531	0	0.4453	0.2546
0.5431	761.655	0	0	0	0	0	0	0	0	0	0	0	0	0	0	0	0	0.053	0	0	0	0	0	0	0	0	0	0	0.0836	0.073	0	0	0	0	0	0	0	0	0	0	0	0	0	0	0	0	0	0	0
1.205	761.146	0	0	0	0	0	0	0	0	0	0	0	0	0	0	0	0	0.1107	0	0	0	0.0759	0	0	0	0	0	0	0.0834	0	0	0	0	0	0	0	0	0	0	0	0	0	0	0	0	0	0	0	0
3.061	760.625	0	0	0	2.0542	0	0	0	0	0.218	0	0	0	0	0.0901	0.1021	0	0	0.1396	0.0316	0	0	0.0448	0.045	0.0252	0	0	0.1123	0.0222	0.0528	0.0358	0.0314	0	0	0	0.0304	0	0	0	0	0	0	0	0	0.1985	0.119	0	0.1871	0
0.4526	760.572	0	0	0	0	0	0	0	0	0	0	0	0	0	0	0	0	0	0	0	0	0	0	0	0	0	0	0	0	0	0	0	0.2608	0	0	0	0	0	0.2429	0	0	0	0	0	0	0	0	0	0
0.5629	760.153	0	0	0	0	0	0	0	0	0	0	0	0	0	0	0	0	0	0	0	0	0	0	0	0	0	0	0	0.0629	0	0	0.0512	0	0	0	0	0	0	0	0	0.062	0	0	0	0	0	0	0	0
0.4986	759.132	0	0	0	0	0	0	0	0	0	0	0	0	0	0	0	0	0	0	0	0	0	0	0	0	0	0	0	0.0491	0.0298	0	0	0	0	0	0	0	0	0	0	0.0561	0	0	0	0	0	0	0	0
0.4872	758.685	0	0	0	0	0	0	0	0	0	0	0	0	0	0	0	0	0	0	0	0	0	0	0.0865	0	0	0	0	0.0556	0	0	0	0	0	0	0	0	0	0	0	0	0	0	0	0	0	0	0	0
0.4093	758.218	0	0	0	0	0	0	0	0	0	0	0	0	0	0	0	0.1814	0	0	0.1143	0	0.1393	0	0	0.465	0	0	0	0	0	0	0	0	0	0.1236	0	0.6132	0.0906	0	0	0.0743	0.7162	0	0	0	0	0	0	0
2.5539	757.4	0	0	0	0	0	0	0	0	0	0	0	0	0	0	0	0	0	0	0	0	0	0	0	0	0	0	0.4813	0.291	0	0	0	0	0.1794	0	0	0	0	0	0	0	0	0	0	0	0	0	0	0
0.4391	756.628	0	0	0	0	0	0	0	0	0	0	0	0	0.3025	0.2746	0	0	0	0	0	0	0	0	0	0	0	0	0	0	0	0	0	0	0	0	0	0	0	0.0674	0.2205	0	0	0	0	0	0.3134	0	0.4254	0
0.568	755.22	0	0	0	0	0	0	0	0	0	0	0	0	0	0	0	0	0	0	0	0	0	0	0	0	0	0	0	0.0758	0	0	0.0516	0	0.0842	0	0	0.0416	0	0	0	0	0	0	0	0	0	0	0	0
3.0895	754.634	11.2317	0	0	0	0	0	0	0	0	0.2398	0	0	0.0559	0	0	0	0.0916	0.0725	0	0.1909	0	0.0671	0.2259	0	0.1701	0.3211	0	0.1432	0	0.2182	0.1038	0	0.2273	0	0	0.1053	0	0	0	0	0.3697	0	0	0.3668	0	0	0.2433	0.242
2.1355	754.444	0	0	0	0	0	0	0	0	0	0	0	0	0	0	0	0	0	0	0	0	0	0	0	0	0	0	0.1701	0	0	0.1093	0	0	0	0	0	0	0	0	0	0	0	0	0	0	0	0	0	0
0.5446	753.658	0	0	0	0	0	0	0	1.8482	1.9075	1.8955	2.1002	2.2135	2.1894	2.032	2.8	4.2849	2.1092	2.3904	0	1.7486	2.2596	0	0	0.4272	1.8483	0	1.5077	2.9557	2.2719	2.7114	2.9024	2.4463	2.3534	0	2.6205	2.871	0	1.3345	0	3.7854	1.2642	3.0321	6.814	0	1.2907	0	2.2135	0.3846
3.091	753.631	0	0	0	0	0	0.3474	0.9371	0.3456	0.2362	0.207	0.3007	0.2964	0.3234	0.2211	0.1455	0.3727	0.1555	0.0768	0.2094	0.3851	0.343	0.3278	0.2038	0.1866	0.1203	0.341	0	0.0117	0.3251	0.1771	0.0798	0.1046	0.2107	0.3706	0.3924	0.2956	0.2579	0.405	0.1813	0.1054	0.4899	0.3938	0.1596	0.466	0.3741	0.0644	0.3586	0.2595
0.7584	753.469	0	0	0	0	0	0	0	0	0.1822	0	0.1717	0	0.1759	0	0	0	0.1107	2.0649	0.3359	0	1.6573	0	0	0.172	0.137	0	0.1624	0.1081	0	0.7053	0	0.0804	0.3341	0.6703	0	0	0	0	0	0.0787	0	0	0	0	0.2865	0	0	0
0.73	381.061	0	0	0	0	0	0	0	0	0	0	0	0	0	0	0	0	0	0	0.3098	0.127	0.2678	0	0.058	0	0.097	0	0	0	0	0	0.1118	0	0	0	0	0.0482	0	0	0	0.0825	0	0	0	0	0	0	0	0
3.1434	380.876	0	0	0	0	0.3261	0.1176	0	0	0	0	0.0105	0	0	0	0	0	0.0088	0	0	0	0	0	0	0	0.0136	0	0	0.0717	0	0	0	0	0	0.342	0	0	0	0	0	0	0	0.0066	0	0.0065	0	0	0	0
0.4568	380.339	0	0	0	0	0	0	0	0.3204	0.2524	0.1741	0	0	0	0.1707	0.1218	0.1355	0.189	0.2458	0.1247	0.125	0.1012	0.2786	0.1504	0	0.2742	0.1632	0.155	0	0	0	0.0844	0.0633	0.1948	0.1989	0	0.1379	0	0.2206	0.1074	0	0.9058	0	0	0	0.2011	0	0.1803	0.2258
1.4397	380.21	0	0	0	0	0	0	0	0.3046	0.3197	0	0.2344	0.207	0	0	0	0	0	0	0	0	0.5691	0	0.2605	0.2427	0	0.228	0.0833	0	0	0	0.1245	0.1864	0	0	0.2543	0	0	0	0.198	0	0	0.4307	0	0	0	0.2825	0	0.4967
0.4118	380.116	0	0	0	0	0	0	0	0.7038	0.5319	0.5926	0.5919	0.6199	0.6547	3.0338	2.6369	0.4714	0.6249	0.7555	0.3029	1.31	0	0.0752	1.0329	0.2064	0.6216	0	0	0.8902	0.2578	0.4453	0	0.1156	0.1542	6.4428	2.7405	0.1088	0	0.4101	0.4044	0.5607	3.5278	0.8798	0.3566	0.3527	0.4268	0.2268	0.7707	0
0.9225	379.218	0	0	0	0	0	0	0	0	0	0.2318	0	0.9215	0.2264	0.6534	0.2553	0.726	0.5582	0.1241	0.4373	0.0698	0.5291	0.1204	0.4706	0.3046	0.5063	0	0	0.3435	0.1317	0.6205	0.4889	0.6429	0.687	0.1168	0.6624	0.3183	0.2473	0	0.4621	0	0.5794	0	0	1.0497	1.5938	0.5628	0	0
2.7977	379.218	0	0	0	0	0	0	0	0.0058	0	0.24	0	1.1016	0.5403	0	0.0127	0.5448	0	0.3628	0	0.112	0.4257	0.3162	0.0097	0.2391	0.3484	0	0	0	0	0.4414	0.0627	0	0	0	0.2546	0	0	0.3221	0	0.0383	0.7485	0.4978	1.1817	1.1424	0.776	0.1755	0	0.0893
1.7246	379.217	0	0	0	0	0	0	0	0.377	0.8413	0.4357	0	0	0.4461	0	0.309	0.2431	0	0.3209	0.2984	0.1678	0	0	0	0	0	0	0	0	0	0.3736	0	0.2653	0	0	0	0	0	0.5465	0	0	0.2394	0.5776	0	0	0	0	0.5454	0.8272
0.3637	379.216	0	0	0	0	0	0	0	0	0	0.2221	0	0	0.2915	0	0	0	0	0	0	0	0	0	0.0517	0	0	0	0	0	0	0	0	0	0	0	0	0	0	0	0	0.0791	0	0	0	0	0	0	0	0
1.1604	379.216	0	0	0	0	0	0	0	0.0459	0.5676	0.3563	0.1294	0.452	0.4245	0.4123	0.2943	0	0.1572	0.0737	0.9784	0.4157	0.0874	0	0.258	0.348	0	0.4355	0	0.1781	0.2029	0	0	0.3918	0.1116	0.309	0.2553	0.281	0	0.1918	0.435	0.1736	0.4067	0.2569	0.3158	0.3969	0	0	0.7056	0.245
0.5886	379.216	0	0	0	50.9082	0	0	0	0.6257	0.5444	0.6835	0.4951	0.1449	0	0.4629	0.3857	0.9448	0.5111	0.1046	0.4245	0.5499	0.4189	0	0.375	0.3105	0.4083	0.5252	0.1461	0.17	0.5977	0.5978	0	0.8622	0	0.5309	0.5533	0.5178	0.2827	0.8236	0.5602	0.1256	0.2724	0	0.5873	0	0	0.5947	0.8659	0.4827
1.9241	379.215	0	0	0	0	0	0	0	0.1344	0.1687	0	0	0	0.1162	0	0	0	0	0.1245	0.1162	0	0.0972	0	0	0	0	0	0	0	0.1541	0.4907	0	0	0	0	0	0	0	0	0	0	0	0	0	0.4271	0	0	0	0
2.2183	379.215	0	0	0	0	0	0	0	0	0.0261	0	0.2905	0.2955	0	0	0	0	0	0	0	0	0	0	0	0.2684	0	0	0	0	0.1528	0	0	0	0	0	0	0	0	0	0.2139	0	0	0	0	0.757	0	0	0	0
2.508	379.213	0	0	0	0	0	0	0	0	0	0	0	0	0	0	0	0	0	0	0	0	0	0	0	0	0	0	0	0	0	0	0	0	0	0	0	0	0	0	0	0	0.3973	0	0	0	0	0	0	0
1.5627	379.213	0	0	0	0	0	0	0	0	0	0	0	0	0	0	0	0	0	0	0	0	0.3549	0	0	0	0	0	0	0	0	0	0	0	0	0	0	0	0	0	0	0	0	0	0	0.2261	0	0	0	0
0.7388	379.195	0	0	0	0	0	0	0	0	0	0	0	0	0	0	0	0	0	0	0	0	0	0	0	0.4217	0	0	0	0	0	0	0	0	0	0	0	0	0	0	0.8346	0	0	0	0	0	0	0	0	0
0.4365	232.989	0	0	0	0	0	0	0	0	0	0	0	0	0	0.083	0	0.1216	0.2478	0	0.419	0	0	0	0.2939	0.1329	0.3205	0	0	0	0	0.0871	0	0	0	0	0	0	0.255	0.1228	0.1085	0.0777	0	0	0.1663	0	0	0.4469	0	0
2.1653	232.189	0	0	0	0	0	0	0	0	0	0	0	0	0	0	0	0	0	0	0	0	0	0	0	0.7419	0	0.2987	0	0	0	0	0	0	0	0	0	0	0	0	0	0	0	0	0	0	0	0	0	0
2.9717	232.155	0	0	2.9306	1.1319	0	0	0	118.411	113.844	109.434	115.347	106.142	111.964	187.427	149.15	247.412	152.577	139.214	125.559	162.199	49.1394	209.468	81.5154	71.7975	226.93	172.082	108.68	134.931	172.301	219.251	94.0998	168.153	135.613	161.049	185.579	134.328	305.959	116.471	133.791	225.589	104.865	50.0612	88.4887	143.307	128.948	83.1154	67.361	23.4937
3.2227	232.149	0	0	0	0	0	0	0	0	0	0.0393	0.0649	0.6381	0.9415	0	0	0.6676	0	0.028	0.2271	0	0.1204	0.5728	0	0	0.389	0.1057	0	0.0444	0	0	0.0229	1.0593	0	0	0	0	0	0	0.21	0	0	0	0	0	0	0	0	0
1.0963	232.064	0	0	0	0	0	0	0	0	0	0	0	0	0	0	0	0	0.4185	0	0.6231	0	0	0.4627	0	0	0	0	0	0	0	0	0.4652	0	0	0	2.0477	0	0	0	0	0	0.769	0	0	0.6312	0	0.789	0	0.5831
0.7539	232.029	0	0	0	0	0	0	0	0	0	0	0	0	1.0059	0	0.4751	0.768	0	0.6344	0	0.1004	0	0	0	0.2376	1.2674	0	0.6642	1.3061	0	0	0	0	0.6233	0	0.7163	2.1459	0.3868	0.0742	0.175	0	0	0	0	0.6271	0	0	1.2562	0
0.5459	232.028	0	0	0	0	0	0	0	304.506	301.576	295.013	314.18	296.916	304.81	307.995	272.571	372.984	225.08	249.615	0	211.054	250.331	2.1465	3.8522	107.938	247.632	1.0922	203.84	288.218	220.544	273.847	255.493	249.395	246.773	5.5419	250.896	262.494	0	217.77	1.5239	330.428	237.066	387.974	628.471	37.8829	244.789	0	383.471	170.51
2.0237	232.028	0	0	0	0	0	0	0	0	0	0	0	0	0	0.327	0	0	0	0	0	0	0	0.561	0	0.5525	1.1204	0	0.5207	0.8054	0.627	1.5341	1.5368	0	0	0	0	0	0.8199	0	0.6227	0	0.9351	0.5831	0	0	0	0	0	0
1.8171	232.028	0	0	0	0	0	0	0	0	0	0	0.1991	0	0	0	0	0	0	0	0	0.603	0	0	0	0	0	0	0	0	0	0	0.0874	0	0	0	0.3961	0.0479	0	0	0	0	0	0.2554	0	0	0	0	0	0
1.5861	231.141	0	0	0	0	0	0	0	2.0404	2.0176	1.8103	1.8609	1.7668	1.7242	2.2934	2.4926	1.6504	1.8813	1.4408	2.774	1.5154	0.3333	1.7585	1.3901	1.1213	1.1275	0	1.9027	1.919	1.9126	1.105	1.2626	2.7254	1.8109	1.8881	1.0961	1.9722	3.1993	1.9328	2.3198	0.9805	1.9671	2.0485	0	2.1723	1.6342	0	0	0
2.1022	231.137	0	0	0	0	0	0	0	0	0	0	0	0	0	0	0	0	0	0	0	0	0	0	0	0	0	0	0	0	0.1948	0	0	0	0	0	0.2421	0	0	0	0	0	0	0	0	0	0	0	0	0
0.4712	231.142	0	0	0	0	0	0	0	0	0	0	0	0.3123	0	0.2602	0.3871	0.4964	0	0.2513	0.4056	0.2691	0	0.4773	0.4015	0.0786	0.3782	0.4712	0.4045	0.225	0.2257	0	0	0.329	0.2648	0.5501	0.4482	0	0.4496	0	0.2665	0	0.7354	0.4862	0	0.7123	0	0	0	0.469
1.8308	231.136	0	0	0	0	0	0	0	0	0	0	0	0	0	0	0	0	0	0	0	0	0	0	0	0.1507	0	0.2926	0.1292	0.163	0.2907	0.1189	0.1416	0.3286	0	0	0	0.0891	0	0	0	0	0.4863	0	0	0	0	0	0	0
0.6379	231.117	0	0	0	0	0	0	0	0.3122	0	0.4696	0	0	0	0	0	0.3686	0	0	0	0.0599	0.4586	0	0	0.2539	0	0	0.1247	0.3009	0.2915	0	0.2697	0.201	0	0	0.2943	0.1307	0	0	0	0	0	0	0.7163	0	0	0	0	0
0.4858	231.093	0	0	0	0	0	0	0	0	0	0	0	0	0	1.0839	0.7105	0	0.3481	0.6998	0.7005	0.6061	0.6077	1.0365	0.5779	0.3533	0.6667	0.736	0.8188	0.3417	0.4214	0.7728	0.305	0.4448	0.6777	1.1333	0.9922	0	1.6387	0.5631	0.7548	0.2959	0.2344	0.4992	1.3142	1.523	2.0081	1.5754	0.687	1.6054
1.4782	231.089	0	0	0	0	0	0	0	0	0	0	0	0	0	0	0	0	0	0	0	0	0	0	0	0	0	0	0	0.1361	0.1046	0	0	0.1119	0	0	0	0	0	0.7987	0	0	0	0	0	0	0	0	0	0
3.2697	70.065	0	0	0	0	0	0	0	0.3622	0	0	0	0	0	0.8377	0	0	0.2438	0	0.9604	0	0	0.1342	0	0.8159	1.406	0	0	0	0.4094	0	0.6974	0	0	0	0	0.388	0.2243	0	0.3507	0.2515	0.5383	0	0	0	0	0	0	0
2.7007	70.0648	1.9558	0	0	0	0	0	0	0	0	0	0	0	0	0	0	0	0	0	0.0122	0	0.006	0	0	0	0.0369	0	0	0.2921	0.3106	0	0.0034	0	0	0	0	0	0	0	0	0	0	0	0	0	0	0	0	0
0.8199	70.0647	0	0	0	0	0	0	0	0	0	0	0	0	0	0	0.1051	0.1609	0.2676	0.1157	0.5344	0.1549	0	0	0	0.0994	0.0999	0.2141	0	0.1437	0.124	0	0.3008	0	0	0.1804	0	0.1873	0	0.2029	0	0	0	0	0	0	0	0	0	0
1.5952	69.0701	0	0	0	0	0	0	0	0	0	0.2459	0.2414	0	0.2795	0.2178	0	0	0.4223	0	0.6885	0.3963	0.3358	0.252	0.6638	0.555	0.3521	0	0.2053	0.3038	0	0	0	0	0	0.3832	0	0	0	0	0	0	0	0	0	0	0.3325	0.3585	0	0
2.9768	69.0701	0	0	0	0	0	0.096	0.5072	0.361	0.3441	0.2939	0	0.2455	0.2607	0.4714	0.5348	0	0.4395	0.1703	0.4153	0.2017	0	0.3651	0.5264	0.274	0.2362	0.1927	0.4588	0.4205	0.3028	0.2171	0.2937	0.373	0.29	0.3482	0.1975	0.5132	0.6901	0.2157	0.6505	0.2366	0.2952	0.2249	0.2256	0	0	0.3804	0	0
2.0955	69.0699	0	0	0	0	0	0	0	0	0	0	0	0	0	0	0.2667	0	0	0	0.0654	0	0	0.175	0.2193	0	0	0	0.1668	0.2153	0	0	0	0.2464	0	0	0	0.2092	0.2933	0.2159	0.2571	0	0	0	0	0	0	0	0	0
1.7849	69.0699	0	0	0	0	0	0	0	0.2466	0.2125	0.2129	0.2675	0.4054	0	0.3415	0	0.2109	0.4687	0	0.9038	0.8736	0.2066	0.1777	0.5618	0.508	0.2336	0.2839	0	0.471	0	0.2315	0.6634	0	0.3915	0	0.4449	0.3739	0.289	0	0.393	0.2742	0.4915	0	0.1927	0.496	0.5489	0.496	0.3298	0.2682
0.5431	69.0637	0	0	0	0	0	0	0	0	0	0	0	0	0	0	0.2028	0.2429	0.1967	0.1335	0.3505	0.2367	0.349	0.3754	0.2938	0.202	0.1977	0.3679	0	0.1711	0.0987	0.1851	0.3266	0.3303	0.2201	0.3752	0.3106	0.1868	0.1651	0.2363	0.3943	0.2514	0	0.3748	0	0	0	0	0.2249	0.5415
1.2943	69.0339	0	0	0	0	0	0	0	0.1506	0.2123	0.1864	0.1657	0.2088	0.2275	0.175	0.16	0.2309	0.165	0.15	0	0.1742	0	0.1164	0.1769	0.1579	0.1844	0.2161	0.1412	0.1053	0	0.183	0.1312	0.1776	0.1541	0.1701	0.132	0.1294	0.1868	0.1251	0.1696	0.1101	0.3054	0.2494	0	0	0.1723	0	0	0
0.7237	68.9981	0	0	0	0	0	0	0	0	0	0	0	0	0	0	0	0	0	0	0	0	0	0	0	0	0	0	0	0.2626	0.0705	0	0	0	0	0	0	0	0	0	0	0	0	0	0	0	0	0	0	0
3.1084	68.2991	0.6	0	0	0	0	0	0	0	0	0	0	0	0	0	0	0.0751	0	0	0	0.0584	0.1026	0	0	0	0	0.0924	0	0	0.0965	0	0	0	0	0	0.0979	0	0	0	0	0	0	0	0	0	0	0.0067	0	0
3.0948	68.1689	0	0	0	0	0	0.4863	0	0	0	0	0.0088	0	0.04	0	0	0.0749	0	0	0.0385	0.0062	0	0.0397	0	0	0.043	0	0	0	0	0	0	0	0	0	0	0.0283	0	0.0645	0.0227	0	0	0.1029	0	0	0.0382	0	0	0.026
3.1006	68.1145	0	0	0	0	0	0.183	0	0	0	0	0.0273	0	0.012	0	0.0758	0.0432	0	0	0	0.0649	0.1148	0	0	0	0	0.0565	0	0.048	0.0844	0.0918	0.0271	0.0818	0.0704	0	0	0.0839	0	0.0532	0.0188	0	0.115	0.051	0	0	0	0	0	0
1.359	68.0496	0	0	0	0	0	0	0	0	0	0	0	0	0.296	0	0.4373	0	0	0	0.5205	0	0	0.4696	0	0	0.1796	0.6506	0	0	0.6467	0	0	0.5298	0	0	0	0.574	0	0.2273	0	0.2967	0	0.5466	0	0	0	0.5795	0	0
2.4647	68.0496	0	0	0	0	0	0	0	0	0	0	0	0	0	0	0	0	0	0	0	0	0	0	0	0	0	0	0	0	0.0982	0	0	0	0	0.1459	0	0	0	0	0	0	0	0	0	0	0	0	0	0
3.1017	68.0082	0	0	0	0	0	0	0	0	0	0	0	0	0	0	0	0	0	0.0443	0.0975	0.0966	0.102	0	0	0.0179	0	0.0766	0	0.0533	0	0.0814	0.0625	0.0858	0.0918	0	0.1183	0	0	0	0	0	0	0	0	0	0	0	0	0
2.0637	767.063	0	0	0	0	0	0	0	0	0	0	0	0.1367	0	0	0	0.1425	0.0895	0	0	0	0.1644	0.1382	0	0	0.1727	0	0.0816	0.0818	0	0.1146	0.083	0	0.0445	0	0	0.0269	0.3036	0	0	0	0	0	0.1531	0.1946	0.1156	0	0	0.3462
3.0459	766.796	0	0	0	0	0	0	0	0	0	0.0385	0	0.0186	0.0252	0	0	0.023	0	0	0	0	0	0	0	0	0	0	0.0167	0	0.0197	0.0281	0	0.0289	0	0	0	0	0.0214	0.2052	0.2354	0	0	0	0.1743	0	0	0	0.0178	0
3.0158	766.526	0	0.4161	0	0	0	0	2.5078	0	0	0.1213	0.1974	0.1641	0.1327	0	0	0	0	0	0	0	0	0	0	0	0.0823	0	0.0814	0	0.1013	0.0923	0	0.089	0.1037	0.14	0.1105	0.0304	0.1751	0.1464	0.0653	0.0782	0.1541	0.221	0	0	0.2117	0	0	0.063
1.964	766.243	0	0	0	0	0	0	0	0	0	0	0	0	0	0	0	0	0	0	0	0	0	0	0	0	0.0666	0.0901	0	0	0	0.066	0.0448	0	0	0	0.0435	0.0451	0.0975	0	0	0	0	0	0	0	0	0	0	0
2.0596	766.066	0	0	0	0	0	0	0	0.2245	0.1882	0.1306	0.1942	0.1919	0.1772	0.211	0.2162	0.2741	0.1273	0.0735	0.3784	0.1765	0.3049	0.1593	0.1993	0	0.337	0.2303	0.1777	0.0916	0.0609	0.1103	0.1092	0.1014	0.1991	0.3042	0.1802	0.1079	0.3173	0.2752	0.1345	0	0.3721	0.2967	0	0.3378	0.2807	0	0.1709	0.3821
2.0628	765.07	0	0	0	0	0	0	0	0	0	0	0	0.0782	0	0	0	0.1104	0.1315	0	0.1347	0.0967	0.158	0	0	0	0.1403	0	0.08	0	0	0	0	0	0	0.2009	0	0	0	0.0632	0	0	0	0	0	0.2704	0	0	0	0.1859
2.608	764.535	0	0	0	0	0	0	0	0	0	0	0	0	0	0	0	0	0	0	0	0	0.0002	0	0	0	0	0	0.1168	0	0	0	0.1001	0	0	0.152	0	0	0	0	0	0	0	0	0	0	0	0	0	0
0.5028	764.501	0	0	0	0	0	0	0	0	0	0	0	0	0	0	0	0	0	0	0	0	0	0	0	0	0	0	0	0	0	0	0	0.1032	0	0	0	0	0	0.4391	0	0	0	0	0	0	0	0	0	0
1.5038	764.239	0	0	0	0	0	0	0	0	0	0	0	0	0	0	0	0	0	0	0	0	0	0	0	0.0977	0	0	0	0	0.2247	0	0	0	0	0	0	0	0	0	0	0.103	0	0	0	0	0	0	0	0
2.0683	764.07	0	0	0	0	0	0	0	0	0	0	0	0	0	0	0.1049	0.0721	0.1129	0	0.0643	0	0.0463	0	0.0688	0	0	0.13	0	0	0	0	0	0	0	0.1328	0.0913	0	0	0.1653	0	0	0.1726	0	0	0	0.1258	0	0	0
3.1147	762.922	0	0	0	0	0	0	0	0	0.0642	0	0	0	0	0	0	0	0	0	0	0	0.0372	0	0.2437	0.2455	0.1171	0	0	0.1499	0	0	0.0901	0	0	0	0.0088	0.1356	0	0	0.1482	0.2099	0	0	0	0.0801	0	0	0	0.0612
0.462	762.551	0	0	0	0	0	0	0	0	0	0	0	0	0	0	0	0	0	0	0	0	0	0	0	0	0	0	0.0637	0	0	0	0	0.18	0	0	0	0	0	0.3462	0	0	0	0.1803	0	0.1652	0	0	0	0.0939
1.193	762.525	0	0	0	0	0	0	0	0	0	0	0	0	0	0	0	0	0	0	0	0	0	0	0	0	0	0	0	0	0	0	0	0	0	0	0	0	0.1254	0	0	0	0.4048	0	0	0	0	0	0	0
0.6026	762.515	0	0	0	0	0	0	0	0	0	0	0	0	0	0	0	0	0	0	0	0	0	0	0	0	0	0	0	0	0	0	0	0	0	0	0	0	0	0.1636	0	0	0	0	0	0	0	0	0	0
1.6741	762.495	0	0	0	0	0	0	0	0	0.2141	0.2273	0.5517	0.3409	0.4252	0.13	0	0	0	0	0	0	0	0	0	0.065	0.1105	0.2967	0.0917	0	0.1246	0	0.0941	0.1126	0.0975	0.2141	0.1312	0.1197	0.1847	0.3162	0.2198	0.118	0.424	0.3004	0.4079	0.8194	0.1912	0	0.2872	0.3273
0.5431	762.173	0	0	0	0	0	0	0	10.0455	9.512	9.6294	10.7762	10.1963	10.5971	10.6804	13.9828	20.683	10.5206	11.8432	0	8.8221	11.2229	0	0	2.5613	9.151	0	7.3931	15.02	11.4671	13.2769	14.0746	11.9557	11.4477	0	12.6369	14.1402	0	6.6152	0	18.7566	6.3402	14.6164	32.4817	0	6.6098	0	11.9158	2.1081
2.1945	381.233	0	0	0	0	0	0	0	0.5889	0.4125	0.5526	0.6326	0.4048	0.5242	0.553	0.1676	0	0	0.0703	0	0.2953	0.0487	0.2896	0.2591	0.0459	0.1411	0.0188	0.2273	0.1003	0.0254	0.5579	0.1703	0.5718	0.3794	0.4208	0.2207	0.1448	0.4762	0.5989	0.2371	0.3466	0.4458	0	0	0.3645	0.4141	0.2231	0	0.8789
2.7871	381.232	0	0	0	0	0	0	0	0	0	0.0181	0.141	0.1164	0.7551	0.1153	0.7518	0	0.0655	0.2028	0	0.2523	0.0809	0.0809	0.9301	0.078	0.049	0	0.4128	0.153	0.1434	0	0.1645	0.7549	0.0919	0.3228	0.4446	0.0112	0.2285	0.7459	0.4867	0.08	1.0291	0	0.0941	0.8209	0.0338	0	0	0.511
0.8747	381.231	0	0	0	0	0	0	0	0	0.6597	0.1092	0	0	0.7048	1.0567	0.3787	1.193	0.7307	0.2632	0	0.325	2.0308	0.48	0	0.2099	0.1476	1.184	0.3014	0.336	0.4954	0.4892	0.8672	1.3746	0.7177	1.5718	1.4809	0.521	0	0.6309	0.5979	0.198	0.2115	1.1045	0.3172	0.7243	1.1311	0.1454	0	0.1775
1.6587	381.231	0	0	0	28.4636	0	0	0	0.4614	0.0748	0.2607	0.7485	1.2116	0.6526	0.4072	0.3292	0.3722	0.4106	0.3899	0.7372	0.0093	0.8434	0.5292	0.4018	0.1442	0.5828	0.6039	0.1515	0	0	0.2486	0.1594	0.2179	0.4951	0.4283	0.4627	0	0.5785	0.8335	0.3317	0.2267	0.7479	0.9105	0.0354	0.8912	0.185	0	1.1632	1.46
2.5245	381.231	0	0	0	0	0	0	0	0	0	0	0	0	0	0	0.1352	0	0	0	0	0	0	0	0	0	0.2495	0	0	0	0	0	0	0	0	0	0	0	0	0	0.286	0.0445	0	0	0	0	0.2471	0	0	0
2.217	381.193	0	0	0	0	22.6665	0	0	0	0	0.3153	0	0	0.0992	0	0	0	0	0	0	0	0	0.2298	0	0	0	0	0	0	0	0	0	0	0	0	0	0	0	0	0	0	0	0	0	0	0	0	0	0.3134
2.789	381.192	41.1742	0	1.2166	0	0	0	0	0.3908	0	0.2639	0	0.1143	0	0	0.3194	0	0	0	0	0	0.4877	0	0.2501	0.4665	0.3525	0.2836	0	0	0	0.0566	0	0.1422	0.1899	0.439	0	0	0	0	0	0.1613	0.4096	0	0	0.3281	0	0	0.6611	0
1.901	381.191	0	0	0	0	0	0	0	0	0	0	0	0	0	0	0	0	0.1481	0	0	0	0	0	0	0	0	0	0	0	0	0	0	0	0	0	0	0	0	0	0	0	0	0	0	0	0	0	0	0
0.7302	381.191	0	0	0	0	0	0	0	0	0	0	0	0	0	0	0	0.226	0	0	0	0	0	0	0	0	0.3316	0	0.2139	0	0	0	0	0	0	0	0	0	0	0.2367	0	0	0	0	0.344	0.794	0	0.2411	0	0
0.3884	381.19	0	0	0	0	0	0	0	0	0	0	0	0	0	0	0	0	0.0461	0.2323	0.1264	0	0	0	0	0	0	0	0	0	0	0	0	0	0	0	0	0	0	0	0	0	0	0	0	0	0	0	0.1597	0
1.7401	381.189	0	0	0	0	0	0	0	0	0	0	0	0	0	0	0	0.3035	0	0	0	0	0	0	0	0	0	0	0	0	0	0	0	0	0	0	0	0	0	0	0	0	0	0.2093	0	0.1627	0.6278	0	0	0
1.2325	381.189	0	0	0	0	0	0	0	0.1118	0	0	0	0	0	0	0	0	0	0	0	0	0.2167	0	0	0	0	0	0	0	0	0.0928	0	0	0	0	0	0	0	0	0	0	0.4694	0	0.1049	0	0	0	0	0
1.0028	381.189	0	0	0	0	0	0	0	0.5133	0	0	0.7667	0	0.1746	0	0.5578	1.1997	0.3102	0.5813	1.5302	0.476	0.5833	0.0334	0.3145	0.0233	0.1944	0	0	0.473	0.6957	0.3081	0	0.4022	0.6962	0.5475	1.0614	0.1516	0	0.6335	0.68	0	0.1437	0.192	0.4286	0	0.771	0.3342	0	0.7279
1.4707	381.188	0	0	0	0	0	32.7592	0	0	0	0	0	0	0	0	0	0	0	0	0	0	0	0	0	0	0	0	0	0	0	0	0	0	0	0	0	0	0	0	0	0	0	0	0	0	0	0	0.384	0
2.9073	381.188	0	0	0	0.1927	0	17.2885	0	0	0	0	0.1934	0	0.4842	0	0.0061	0.1108	0	0.2226	0	0	0	0	0	0	0	0	0	0	0.0078	0	0	0	0	0	0	0	0	0	0.1559	0	0	0.2194	0.366	2.1161	0.1666	0	0.1752	0.0837
0.5464	381.077	0	0	0	0	0	0	0	0	0	0	0	0	0	0	0	0	0	0	0	0	0	0	0	0	0.1229	0	0	0	0.109	0.1314	0	0	0	0	0	0	0	0	0	0	0	0	0	0	0	0	0	0
0.4604	235.03	0	0	0	0	0	0	0	0	0	0	0	0	0	0	0	0	0	0	0	0	0	0	0	0	0	0	0	0	0	0	0	0	0	0	0	0	0	0	0.0873	0	0	0	0	0	0	0	0	0
0.565	234.119	0	0	0	0	0	0	0	0	0	0	0	0	0	0	0	0	0	0	0	0	0	0.3806	0.8152	0.0898	0	0	0	0	0	0	0	0	0	0.6358	0.3337	0	0	0	0	0	0.2462	0	0.2513	0	0	0	0	0.2672
0.9714	234.085	0	0	0	0	0	0	0	0	0	0	0	0	0	0	0	0	0	0.196	0	0	0	0.1825	0.2874	0.1185	0.2341	0	0	0	0	0.1992	0	0	0	0	0	0.1339	0	0	0	0	0	0	0	0	0	0	0	0
2.457	234.079	0	0	0	0	0	0	0	0	0	0	0	0	0	0	0.2071	0	0.1657	0	0	0.2551	0.2539	0	0.276	0	0	0.3313	0.1597	0	0.1008	0	0.2377	0.1943	0	0.2303	0	0.2037	0	0	0.2114	0	0	0	0	0	0	0	0	0
2.8415	234.06	0	0.5709	0	0	0	0	0.2891	0	0.0242	0.0127	0	0	0	0	0	0	0	0	0.0098	0	0	0	0.2651	0	0.4601	0	0.3143	0	0	0.2358	0.1319	0.1365	0	0.6293	0	0	0	0.1566	0	0	0	0.0251	0	0	0.1039	0.0437	0	0.1295
0.4976	234.045	0	0	0	0	0	0	0	0	0	0	0	0	0	0	0	0	0	0	0	0	0	0	0	0	0	0	0	0	0	0	0.1478	0	0	0	0	0	0	0	0	0	0.1102	0	0	0	0	0	0	0
1.1757	234.045	0	0	0	0	0	0	0	1.7485	1.844	1.7809	1.9388	1.8194	1.8724	1.1314	0.4277	0.4484	0.4048	0.5637	0.8795	0.78	0.3941	0.5104	1.2498	1.0319	0.8581	0.8467	0.4997	1.0354	0.6884	11.0451	7.4349	0.4761	0.4433	0.4712	0.448	0.6456	3.3251	0.8429	0.9781	0.3929	4.1633	1.9261	1.281	3.1563	2.883	5.6551	1.5161	3.0979
1.3526	234.043	0	0	0	0	0	0	0	0.185	0.1894	0.2045	0.2414	0.2328	0.1957	0.1167	0	0	0	0	0	0.0895	0	0	0.1002	0.0741	0	0	0	0.0865	0	0.9401	0.5593	0	0	0	0	0	0.2489	0.089	0	0	0.3744	0.2931	0.1383	0.4423	0.2898	0.5384	0.2121	0.4503
2.1137	233.175	0	0	0	0	0	0	0	0	0	0	0	0	0	0	0.1669	0.1628	0	0	0	0	0	0	0	0	0	0	0	0	0	0	0	0	0	0	0	0	0	0	0	0	0	0	0	0	0	0	0	0
0.5305	233.155	0	0	0	0	0	0	0	0.1211	0	0	0.1352	0	0	0	0	0	0	0	0.1782	0	0	0	0	0	0	0.1997	0.0685	0	0	0	0	0	0	0	0	0	0	0	0	0	0.1177	0	0	0	0	0.6182	0	0
1.6702	233.123	0	0	0	0	0	0	0	0	0	0	0	0	0	0	0	0	0	0	0	0	0	0	0	0.1074	0	0	0.2133	0.2008	0	0	0	0	0	0	0	0	0.3057	0.1781	0.2289	0.1115	0	0	0	0	0	0	0	0
0.6207	233.118	0	0	0	0	0	0	0	0.1925	0	0.1255	0	0	0	0	0	0.9261	0.2842	0	1.1351	0	0	1.0237	0.7866	0.5244	0	1.3168	0.1051	0	0	0	0	0	0	0.8715	0	0	1.1749	0.2897	0.9602	0	0.0904	0	0	0	0	0	0	0
1.2365	233.072	0	0	0	0	0	0	0	0	0	0	0	0	0	0	0	0	0.0593	0	0	0	0	0	0	0	0	0.1786	0	0	0	0	0	0	0	0	0	0	0	0	0	0	0	0	0	0	0	0	0	0
2.8021	233.064	0.9999	1.3399	0	0	0	0	0.9353	0	0.3464	0.5994	0.5829	0.5583	0.1755	0.7448	0	0.3083	0	0	0.8455	0.4713	0.4395	0	0.2108	0.2748	0	0	0	0.4436	0	0.0539	0	0	0.6262	0.297	0.6336	0.0161	0.8823	0.5894	0.8507	0.1569	0.8089	0.6218	0	0.4769	0	0.7323	0.0252	0.5191
1.0537	233.042	0	0	0	0	0	0	0	0	0	0	0	0	0	0	0.3473	0	0	0	0	0	0	0	0	0	0	0	0	0	0	0	0	0	0	0	0.4259	0	0	0	0	0	0	0	0	0	0	0	0	0
1.9156	233.035	0	0	0	0	0	0	0	0	0	0	0	0	0	0	0	0	0	0.1315	0	0	0	0	0	0.1818	0	0	0	0	0	0	0.1033	0.3445	0	0	0.1822	0	0	0	0.38	0	0	0	0	0	0	0	0	0
2.3313	74.0966	0	0	0	0	0	0	0	0	0	0	0	0	0	0	0	0	0.2215	0	0	0	0.2643	0	0	0	0	0	0	0	0	0	0	0	0	0	0	0	0	0	0	0	0	0	0	0	0	0	0	0
1.7406	74.0824	0	0	0	0	0	0	0	0	0	0	0	0	0	0	0	0	0	0	0	0	0.4241	0	0	0	0	0	0	0.069	0	0	0	0	0	0	0	0	0	0	0	0	0	0	0	0	0	0	0	0
1.9699	74.0715	0	0	0	0	0	0	0	0.388	0.3989	0.3962	0.3422	0.3552	0.3875	0.6001	0.2658	0.3834	0.4746	0.3072	0.4038	0.4138	0.2598	0.5216	0.4214	0.3541	0.6003	0.6609	0.3957	0.2726	0.4354	0.4937	0.3539	0.371	0.3293	0.5739	0.3992	0.4454	0.6292	0.4408	0.4772	0.2111	0.5844	0.1622	0.2411	0.4138	0.2904	0.4606	0.2108	0.2682
2.9732	73.0649	0	0	0.5796	0	0	0	0.6534	0	0	0	0	0	0	0	0.1976	0	0	0	0.1546	0.0045	0	0	0.2015	0.1078	0	0	0.1248	0.1116	0.126	0	0	0.0737	0	0	0	0.1993	0.1531	0	0.1648	0	0	0.1667	0	0	0	0	0	0
0.9158	72.0812	0	0	0	0	0	0	0	0	0	0	0	0	0	0	0	0	0	0	0	0	0	0	0	0	0	0	0	0.1425	0	0	0	0	0	0	0	0.1862	0	0	0	0	0	0	0	0	0	0	0	0
3.4172	72.0806	0	0	0	0	0	0.4201	0	0	0	0.2215	0	0	0	0	0.0641	0	0.1232	0	0.2733	0.1533	0.2178	0.1976	0.1347	0	0	0	0.0297	0.0225	0	0	0.0751	0	0.1591	0.0424	0.1828	0.0844	0	0.0232	0	0.0816	0	0.0922	0	0	0.1833	0.3439	0	0.3245
1.6624	72.0799	0	0	0	0	0	0	0	0.9231	0.8451	0.827	0.9296	0.8368	0.8454	1.7357	0.9511	0.5728	0.7233	0.7025	1.2806	1.2145	0.6651	1.477	1.4394	1.1369	0.7343	1.0997	0.7326	0.6976	0.4241	0.8479	1.2456	0.4828	0.9626	1.2476	0.26	0.5766	1.2356	0.2732	0.838	0.4832	0.9525	0.3768	0.4706	0.5244	0.5905	0.8335	0.7607	0.7573
1.3163	72.0447	0	0	0	0	0	0	0	0.554	0.5634	0.542	0.4818	0.5331	0.4935	0.6577	0.459	0.5735	0.3963	0.3796	0.6677	0.4276	0.3235	0.6215	0.4255	0.358	0.5768	0.6609	0.3955	0.3302	0.3832	0.5016	0.3701	0.4931	0.409	0.5982	0.4504	0.3569	0.5685	0.4943	0.5198	0.3143	0.6597	0.5281	0.5839	0.6379	0.5161	0.6899	0.5007	0.4645
2.098	71.0852	0	0	0	0	0	0	0	0	0	0	0	0	0	0	0	0	0	0	0	0	0	0	0.2017	0.2147	0	0	0	0.1988	0	0	0.1929	0	0	0	0.1975	0	0	0	0	0.1822	0	0	0	0	0	0	0	0
1.7279	71.0497	0	0	0	0	0	0	0	0	0	0	0	0	0	0	0	0	0	0	0	0.1765	0	0	0	0.1486	0	0.1704	0	0.1442	0	0	0.0867	0	0	0	0	0	0	0	0	0	0	0	0	0	0	0	0	0
3.1096	70.8778	0	0	0	0.6978	0	0	0	0	0	0	0	0	0	0	0	0	0	0	0	0	0	0	0	0.0247	0	0	0	0.0274	0.0666	0	0.0318	0.0635	0	0	0.0902	0	0	0	0	0	0	0	0	0	0	0	0	0
3.1185	70.823	0	0	0.1157	0.0385	1.2126	0	0	0	0	0	0	0	0	0	0	0	0	0	0	0	0	0	0	0	0	0	0	0	0.0649	0	0	0	0	0	0.0861	0	0	0	0	0	0	0	0	0	0	0	0	0
3.1306	70.7382	0	0	0	0	0	0	0	0	0	0	0	0	0	0	0	0	0	0	0	0	0	0	0	0	0	0	0	0	0.0847	0	0	0	0	0	0.1078	0	0	0	0	0	0	0	0	0.0046	0	0	0	0
3.1072	70.685	0	0	0	0.3113	0	0	0	0	0	0	0	0.0222	0	0	0	0	0	0	0	0	0	0	0	0	0	0	0	0.0413	0	0.0119	0	0.067	0	0.0383	0.0779	0.0656	0	0	0	0	0	0	0	0	0	0	0	0
3.0948	70.6328	0	0.0371	0	0	0	0.3381	0	0	0.0198	0	0.0174	0.0128	0	0	0	0.0692	0	0	0	0	0.0638	0.0425	0	0	0	0.0595	0	0.0151	0.0715	0.0467	0	0	0.0433	0.0429	0.0399	0	0	0.0442	0	0.0166	0.0483	0.0392	0	0	0	0	0.0336	0
0.645	70.0653	0	0	0	0	0	0	0	0	0	0	0	0	0	0.3607	0.4575	0.3736	0.3296	0.0934	0.2414	0.4	0.2284	0.4146	0.4047	0.1498	0.3245	0.5612	0.2949	0.3411	0.2959	0.3986	0.1663	0.2673	0.3645	0.3564	0.324	0.2749	0.4076	0.4295	0.3361	0.1631	0.4812	0	0	0	0.3387	0	0	0
0.4621	776.57	0	0	0	0	0	0	0	0	0	0	0	0	0	0	0.0666	0.1129	0	0	0	0.0814	0	0	0	0	0	0	0.1171	0	0	0	0	0.3355	0	0	0	0	0	0.5854	0	0	0	0	0	0.2367	0	0	0	0
1.8494	776.518	0	0	0	0	0	0	0	0	0	0	0.1186	0	0	0	0	0	0	0	0	0	0	0	0	0	0	0	0	0	0	0	0	0	0	0	0	0	0	0	0	0	0.2208	0	0	0	0.1624	0	0	0
1.4017	776.51	0	0	0	0	0	0	0	0.4394	0.8705	1.7088	4.2795	1.613	4.0201	0.2544	0.6092	0.8384	0.742	0.481	1.2491	0.6347	0.7316	0.8535	0.7615	0.5978	1.2737	0.4403	0.5781	0.4836	0.6522	0.9427	0.3314	1.1217	0.6919	1.1352	0.9865	1.0205	1.7488	3.167	1.9322	1.28	5.0339	6.3853	6.4694	8.2699	3.6727	5.1908	6.295	5.7103
1.6211	776.509	0	0	0	0	0	0	0	0	0	0	0.2815	0.8027	0.324	0	0.1217	0.3097	0.1073	0	0	0.0395	0	0	0	0	0.4132	0.5637	0.1528	0	0.0458	0.367	0.1323	0.3839	0.2532	0.3246	0.4685	0.0205	0	0.8148	0	0.0961	0.7104	0	0.4925	0.9363	0	0.1108	0	0
0.505	776.111	0	0	0	0	0	0	0	0	0	0	0	0	0	0	0	0	0	0	0	0	0	0	0	0	0	0	0	0.1134	0.1176	0.0542	0	0.0486	0.0781	0	0	0.1409	0	0	0	0.1357	0	0	0	0	0	0	0	0
0.7519	775.982	0	0	0	0	0	0	0	0	0	0	0	0	0	0	0	0	0	0	0	0	0	0	0	0	0	0	0	0	0	0.2984	0	0	0.0485	0	0	0	0	0	0	0	0	0	0	0	0	0	0	0
0.7636	775.484	0	0	0	0	0	0	0	0.1719	0	0	0	0	0	0	0	0	0.1194	1.4449	0.2825	0	1.0548	0	0	0.1443	0	0	0.1765	0.0637	0	0.3735	0	0	0.2423	0.5133	0	0	0	0	0	0	0	0	0	0	0	0	0	0
0.5626	775.158	0	0	0	0	0	0	0	0	0	0.0675	0	0	0	0	0.1674	0.1619	0.0861	0.1623	0	0.0574	0.1165	0	0	0	0	0	0	0.3734	0.0975	0.1706	0.2557	0.1402	0.1685	0	0.116	0.2551	0	0	0	0.2283	0	0	0.1681	0	0	0	0	0
0.4432	774.577	0	0	0	0	0	0	0	0	0	0	0	0	0	0	0	0	0	0	0	0	0	0	0	0	0	0	0	0	0	0	0	0.1249	0	0	0.068	0	0	0.0875	0	0	0	0.1242	0	0	0	0	0	0
0.5063	773.158	0	0	0	0	0	0	0	0	0	0	0	0	0	0	0	0.1155	0.1128	0	0	0	0	0	0	0	0	0	0	0.081	0	0	0	0	0	0	0	0	0	0	0	0	0	0	0	0	0	0	0	0
0.453	772.596	0	0	0	0	0	0	0	0.2432	0.332	0.3173	0	0	0	0	0	0	0	0	0.2789	0.1194	0	0.142	0	0	0.2284	0	0.0875	0	0	0.1351	0.0469	0.0694	0	0	0.0659	0	0	0.2307	0	0.1219	0.1646	0.113	0	0	0	0	0	0
0.495	772.138	0	0	0	0	0	0	0	0	0	0	0	0	0	0	0	0.0449	0	0	0	0	0	0	0	0.0728	0	0	0	0.0417	0	0	0	0	0	0	0	0	0	0	0	0	0	0	0	0	0	0	0	0
0.4259	770.633	0	0	0	0	0	0	0	0	0	0	0	0	0	0	0	0	0	0	0	0	0	0	0	0	0	0	0	0	0	0	0	0	0	0	0	0	0	0	0	0	0	0	0	0	0	0	0	0
0.5571	768.663	0	0	0	0	0	0	0	0	0	0	0	0	0	0	0.1914	0.2511	0.1349	0.1983	0	0	0.1631	0	0	0	0	0	0	0.3608	0.1299	0.1457	0.2882	0.1535	0.1884	0	0.2245	0.2712	0	0	0	0.3127	0	0.1451	0.2979	0	0	0	0	0
2.0664	768.063	0	0	0	0	0	0	0	0	0	0.1784	0	0	0	0.2439	0	0	0	0	0	0	0.1709	0	0	0	0	0.0821	0.0388	0	0	0	0	0	0	0.2223	0.0702	0.1091	0	0.1532	0.1116	0	0.0959	0	0	0	0	0	0	0
0.5454	767.129	0	0	0	0	0	0	0	0.5515	0.5511	0.4503	0.543	0.2301	0.4707	0.4028	0.3113	0.3723	0.1097	0.2754	0	0.3243	0.1525	0	0	0.0926	0.3085	0	0.3431	0.0778	0.1529	0.219	0.1154	0.2544	0.2057	0	0.2268	0.1536	0	0.3181	0	0.1655	0.2913	0.5244	0.6585	0	0.329	0	0.5741	0.3647
3.0697	383.146	0	0	0	0	0	0	0	0	0	0	0	0.2887	0.1461	0	0	0	0.0747	0	0.2732	0	0.1331	0	0.0316	0	0	0	0	0.0819	0	0	0.0341	0	0	0	0.1821	0.1415	0	0.0132	0	0	0.0911	0	0	0	0	0	0	0.3111
3.2595	383.144	0	0	0	0	0	14.5222	0	0	0.0141	0	0	0.3393	0	0	0	0.4204	0	0.0123	0	0	0	0	0	0	0	0	0	0	0	0	0	0	0.5399	0	0	0	0	0	0	0.1324	0	0	0.2215	0.442	0.3693	0	0.0545	0
2.1577	383.131	0	0	0	0	0	0	0	0	0	0	0	0	0	0	0	0	0	0	0	0	0	0	0	0.2266	0	0.2784	0	0.2053	0	0	0	0	0	0	0	0.0275	0	0	0	0	0	0	0	0	0	0	0	0
0.5443	383.09	0	0	0	0	0	0	0	0.3466	0.3378	0.37	0.3757	0.3616	0.3375	0.3674	0.5208	0.7976	0.3638	0.4152	0	0.3224	0.3798	0	0	0.1266	0.2966	0	0.2528	0.7313	0.4407	0.4967	0.5505	0.4145	0.4271	0	0.4631	0.5213	0	0.2233	0.0843	0.7861	0.2364	0.4442	1.164	0	0.2285	0	0.3591	0
0.4455	383.043	0	0	0	0	0	0	0	0.2785	0.2734	0.2294	0.3062	0.2332	0.3028	0	0	0	0	0	0	0	0	0	0	0	0	0	0	0	0	0	0	0	0	0	8.062	0	0	0	0	0	0	0	0.3825	0	0	0	0	0.1817
0.5082	382.293	0	0	0	0	0	0	0	0.3169	0.2462	0.1408	0	0	0	0.2117	0.1065	0.1213	0.0838	0.135	0.2113	0.1198	0.1358	0.1732	0.1714	0.0842	0.1891	0.1595	0.0862	0	0	0	0	0	0.0766	0	0	0	0.1371	0	0	0	0	0	0	0	0	0	0	0
1.5164	382.257	0	0	0	0	0	0	0	0.5666	0.585	0.197	0.6431	0.6114	0.5705	0.3957	1.1977	0.63	0.8593	0.6125	1.4665	0.6668	0.3912	0.8825	0.9855	0.2065	0.9388	0.2467	1.218	1.0086	0.6129	0.3363	0.1919	1.4838	1.038	0.2982	0.853	0.9461	0.8087	0.5313	1.2413	0.5756	0.4705	0.3957	0	0	0.1938	0.2218	0	0
1.8448	382.257	0	0	0	0	0	0	0	0	0	0.2615	0	0	0	0	0.3364	0.3	0.1988	0.2194	0.583	0.1876	0	0.4114	0	0	0	0	0.3455	0.2551	0.1243	0.3838	0	0.3398	0.433	0	0.1682	0.1531	0	0.1923	0.2812	0	0	0	0	0	0	0	0	0
3.1927	382.196	0	14.5907	0	0	0	0	0	0	0	0.0887	0	0.0252	0.3937	0.3733	0	0	0	0	0.8979	0	0.3127	0.1677	0.0247	0	0.0211	0	0.4635	0.04	0	0.0201	0.5237	0	0	0	0.2109	0.2285	0	0	0.045	0.14	0.4118	0	0.3905	0	0	0.0599	0	0.2179
0.4204	382.131	0	0	0	0	0	0	0	0	0	0	0	0	0	0	0	0	0	0	0	0	0	0	0	0.1594	0	0	0	0.0486	0	0	0.0769	0	0	0	0	0	0	0	0	0	0	0	0	0	0	0	0	0
3.0825	381.876	0	0	5.2669	0	0	0	0	0.0186	0.0091	0	0	0	0	0.0148	0.4838	0.0008	0	0	0.0135	0	0	0	0	0	0	0	0	0	0	0	0	0	0	0	0.2016	0	0	0	0	0	0	0	0	0	0.097	0	0	0
3.0674	381.249	0	0	0	0	0	0	0	0.2302	0	0.6323	0.0345	0	0	0	0.4688	0	0.1416	0	0.2862	0	0	0	0	0	0.1747	0	0	0	0	0	0.1376	0.1225	0	0.0878	0.1887	0	0	0	0.0371	0	0.6518	0	0.964	0.2684	0	0.7244	0	0.3179
0.5792	381.235	176.201	177.488	157.643	100.478	113.92	100.238	112.072	0.5685	0.9424	0.1236	0.2891	0.1709	0.1976	0.2394	0	0.3238	0	0.3171	0.4412	0.0998	0	0.4542	0.3085	0	0.4055	0.749	0.1904	0	0.3663	0.2142	0.4643	0.156	0	0.2651	0.2162	0.3885	0.3741	0.6166	0.188	0.3533	0	1.6169	0.1512	0.0259	0.2513	0.4935	2.0127	0.6548
1.8981	381.234	0	0	0	0	0	0	0	0	0.1847	0	0	0	0.2639	0	0	0.1495	0	0.0267	0	0.5263	0.7376	0	0	0	0.1805	0.2368	0	0	0	0	0	0	0	0	0.1058	0.1744	0	0	0	0	0	0	0	0	0	0.2081	0	0.2051
1.0898	381.234	0	0	0	0	0	0	0	0.85	0.7747	0.0462	0.2051	0.1424	0.861	0.2002	0.6711	0.109	0.3124	0.4391	0.3786	0.2389	0	0.3719	0.3804	0.0585	0	0.2357	0.0639	0.1468	0.4178	0.1336	0.1095	0	0.5719	0.7067	1.5309	0.3207	0.4581	0.9938	0.7494	0.7621	0.3158	0.5751	1.2675	0.1478	0	0.0592	1.3897	0.629
1.2256	381.233	0	0	0	0	0	0	0	0.2091	0.3081	0	0.9762	0.3807	0.3047	0	0.1202	0.1632	0	0	0.0707	0	0.039	0	0	0.0892	0.2563	1.0991	0.0818	0	0.0614	0.216	0.3484	0.1312	0.0396	0	0.1327	0.1065	0.3133	0	0.2813	0.0863	0	0	0.9172	0.6984	0	0.6907	0	0.157
0.5258	236.033	0	0	0	0	0	0	0	0.2721	0.2721	0.2881	0.2092	0.217	0.2365	0.2022	0.2437	0.415	0.2077	0.1774	0	0.1367	0.2728	0	0	1.382	0.3563	0.6915	0.2866	0.2609	0.4863	0.8265	1.3652	0.6753	0.1767	0	0.6513	0.1764	0.3389	0.445	0	0.2678	0.1489	0.2578	0.4281	0	0.1695	0	0.2589	0
0.5289	235.181	0	0	0	0	0	0	0	1.1847	1.1799	1.1338	1.1857	1.1509	1.1857	1.0935	0.3982	0.3175	0.5985	2.2279	0	0.5178	0.4422	1.1325	5.6505	5.238	0.7057	15.0606	2.1728	1.6387	0.9734	1.764	0.9343	0	0	0.9211	0	0.1215	0.2684	0.3444	10.3035	0	0	0.6097	0	0	1.1369	0.5314	0	0
2.5614	235.168	0	0	0	0	0	0	0	0	0	0.3507	0.3384	0	0	0	0.3573	0	0.4162	0	0.153	0.3875	0	0.3229	0	0	0.3661	0.3991	0	0.2069	0.2464	0	0	0.3755	0.2331	0.4888	0.7531	0.3303	0.6369	0.2274	0.3088	0	0.1473	0	0	0	0	0	0	0
3.4454	235.165	0	8.2792	0	0	0	0	0	0	0	0	0	0	0.0877	0	0.1591	0	0	0.2354	0	0	0	0	0.1623	0.1701	1.1588	0	0.1423	0.9461	0	0	0	0.1382	0.194	0.116	0	0	0.4858	0	0	0	0	0	0	0	0	0	0	0
1.4947	235.132	0	0	0	0	0	0	0	0	0.4108	0	0.4999	0	0.6574	0	0.2647	0	0.1322	0	0.3277	0	0.415	0.1392	0.1594	0.1101	0.3875	0.1507	0.2116	0.4839	0.3498	0.168	0.1203	0.6932	0.5224	0.19	0.2491	0.6109	0.3026	0.4902	0.2755	0.2457	0	0	0	0	0	0	0	0
0.6162	235.131	0	0	0	0	0	0	0	0.0624	0	0.185	0	0.3352	0.3128	0	0	0	0	0	1.7101	0	0	1.1179	1.442	0.0385	0	1.5205	0	0	0	0.0989	0	0	0	1.2574	0	0	1.5844	0	1.0799	0	0.1081	0	0	0	0.3575	1.0421	0	0.3166
1.6925	235.141	0	0	0	0	0	0	0	0.2534	0	0.299	0	0	0	0	0.2574	0	0.4709	0	0	0.5429	0	0.3933	0.2181	0.2887	0.2083	0.4902	0.19	0.8316	0.3019	0.7509	0.0857	0.2346	0.3484	0.2515	0.3657	0.2261	0	0.3688	0.4927	0.1772	0	0	0	0	0	0	0	0
0.8468	235.126	0	0	0	0	0	0	0	0	0	0	0	0	0.2733	0	0.4405	0.3734	0.2585	0	1.3317	0.3478	0	0.1545	0.5243	0	0.1852	0.5782	0.1404	0	0.1476	0.5098	0	0.373	0.2636	0	0	0	0.1635	0.4428	0	0	0	0	0	0	0.4331	0	0	0
1.1953	235.119	0	0	0	0	0	0	0	11.5108	11.5969	11.2848	12.0263	10.8895	9.293	19.3152	11.7776	7.198	8.1183	8.7336	18.5403	10.4437	6.8751	25.5145	15.6806	15.7577	18.845	26.5539	12.5055	19.8904	11.9104	19.234	8.6021	9.6621	9.7082	15.0905	10.5281	12.5139	20.5212	12.7306	17.9631	17.6592	12.0707	6.3984	5.9239	7.445	11.0756	15.0292	4.8238	10.5874
2.4419	235.118	0	0	0	0	0	0	0	0.7596	0.7008	1.4957	0.81	0.6567	1.5573	0.8824	0.9035	0.2905	1.4695	3.3202	2.0603	0.5008	1.0364	3.2256	4.5167	2.788	1.1573	2.1039	2.5373	0.4569	3.1202	3.5802	1.7674	0.7418	2.4294	3.3789	0.3779	0.9451	0	0.1833	1.2317	1.3945	0.423	0.4103	0.2668	0.665	1.683	0.4928	0	0.6082
2.2364	235.117	0	0	0	0	0	0	0	0.944	0.8598	0.3626	0.9182	0.6692	0.906	1.25	0.4328	0.0868	0.8513	4.2818	1.1165	0.3682	0.5284	1.8267	2.2978	1.6975	1.481	1.3049	4.4955	0.4535	1.7435	1.8803	1.1114	0.3759	1.3324	1.6267	0.8923	0.4697	1.0475	0.3032	1.5961	0.7289	0.426	0	0	0.5309	2.1023	0.1449	0	0
1.9058	235.111	0	0	0	0	0	0	0	0	0	0	0	0	0	0	0.3818	0	0.1289	0	0	0.1429	0	0	0.6489	0	0	0.2233	0	0.5675	0	0.5253	0	0	0	0	0.0886	0	0	0	0	0	0	0	0	0	0	0	0	0
0.8981	235.08	0	0	0	0	0	0	0	0	0	0	0	0	0	0.2337	0	0	0.2017	0	0	0	0	0.0728	0	0	0.0954	0.1636	0.072	0	0.3188	0	0	0.1438	0	0	0	0.1373	0	0	0	0	0	0	0	0	0	0	0	0
0.6865	235.068	0	0	0	0	0	0	0	0	0	0	0	0	0	0.6963	0	0	0	0	0	0	0	0.1034	0.391	0	0	0.2861	0	0	0	0	0	0	0	1.3123	0	0	0	0	0	0	0	0	0	0	0	0	0	0.2843
2.6528	235.064	0	0	0	0	0	0	0	0	0	0	0	0.0006	0.0088	0.0024	0.0067	0.0039	0	0	0	0	0.0076	0	0	0	0	0.9285	0	0.2222	0	0	0	0	0	0	0	0	0	0	0	0	0	0	0	0	0	0.036	0	0
2.3421	235.053	0	0	0	0	0	0	0	0	0.1853	0.2051	0.1851	0.2111	0	0	0.1775	0.0826	0.3437	0	0	0.169	0.3602	0	0	0	0	0	0	0.5449	0.2963	0.2495	0.411	0.3318	0.3104	0	0.3727	0.3399	0	0.3563	0	0.3009	0	0	0.2721	0	0.1593	0	0	0
0.4722	77.0387	0	0	0	0	0	0	0	0.2585	0.2791	0.3733	0	0.3499	0.1938	0	0.4192	0.2249	0.1448	0	0.4986	0.5233	0.4224	0.5404	0.2275	0.426	0.1061	0.6325	0.3138	0.2336	0.3556	0.3876	0.2808	0.4169	0.2159	0.5296	0.3825	0.2354	0.4145	0.2828	0.4167	0.2759	0	0.3242	0	0.7589	0	0	0.5068	0.4391
1.7757	77.0386	0	0	0	0	0	0	0	0.148	0	0.1987	0	0.1883	0	0	0	0	0	0.1816	0.3271	0	0	0	0	0.1898	0	0	0.2742	0	0.1945	0	0	0	0	0	0.128	0	0.3947	0	0	0	0	0	0	0	0	0	0	0
3.1122	76.2823	0.012	0	0	0	0	0	0	0	0	0	0	0	0	0	0	0	0	0	0	0	0	0	0	0	0	0	0	0	0.1034	0	0	0	0	0	0.1008	0	0	0	0	0	0.0952	0	0	0	0	0	0	0
3.0921	76.2075	0	0	0	0	0	0	0	0	0	0	0.0326	0.0254	0.0367	0	0.064	0.1639	0	0	0.0803	0.0901	0.0562	0	0	0	0	0	0.0119	0.0458	0	0	0.0408	0.1107	0.0756	0.0801	0	0	0.0101	0	0	0.0202	0.0692	0	0	0	0.0473	0	0	0
3.1043	76.1042	0	0	0	0.4636	0	0.601	0	0	0	0	0	0	0.0625	0	0	0	0.0622	0	0.1675	0.0969	0	0	0	0	0	0.1151	0	0.0576	0.136	0.1018	0	0.0919	0.0728	0	0.2132	0	0	0.0964	0	0	0.1356	0.1089	0	0	0	0	0	0
2.9442	76.0752	0	0	0	0	0.1728	0.0191	0	0	0	0	0.921	0	0.8103	0	0	0	0	0	0	0	0	0	0	0	0	0	0	0	0	0	0	0	0	0	0	0.4886	0	0	0.79	0	0	0.395	0	0.9983	0.558	0	0.9	0.3572
0.9529	76.0401	0	0	0	0	0	0	0	0	0	0	0	0	0	0	0	0	0	0	0	0	0	0	0	0	0	0	0	0.1167	0	0	0	0	0	0.0932	0	0	0	0	0	0	0	0	0	0	0	0	0	0
2.0665	76.0395	0	0	0	0	0	0	0	0	0	0	0	0	0	0	0.1755	0	0	0	0.2229	0	0	0	0	0	0	0	0	0.2161	0.0671	0	0	0.2287	0	0	0	0.1157	0	0	0.1329	0	0	0	0	0	0	0	0	0
1.2155	76.0388	0	0	0	0	0	0	0	0	0	0	0	0	0	0	0	0	0	0	0	0	0	0.1965	0	0.0789	0.0773	0	0.0768	0.0528	0	0	0	0	0	0	0	0	0	0	0	0	0	0	0	0	0	0	0	0
3.1133	76.0253	0	0	0	0	0	0	0	0	0	0	0	0	0	0	0	0	0	0	0	0	0	0	0	0	0	0	0	0.0495	0.1069	0	0.0131	0.1099	0	0	0.1391	0.108	0	0	0	0	0.1153	0	0	0	0	0	0	0
3.0954	75.975	0	0	0	0	0	0	0	0	0	0	0	0.0457	0.0514	0	0	0	0	0	0.1026	0.1321	0.1092	0.0691	0	0	0	0	0	0.0483	0	0	0.0625	0	0.0792	0.069	0.157	0	0	0	0.0394	0	0	0	0	0	0.05	0	0	0.0514
3.1039	75.9147	0	0	0.675	0	0	0	0	0	0	0	0	0	0	0	0.0969	0.0951	0	0	0.1149	0.1005	0	0	0	0	0	0	0	0.0484	0.1648	0	0.0463	0.1237	0.0615	0	0.0506	0.1212	0	0	0	0	0	0.0654	0	0	0	0	0	0
3.0977	75.8481	0	0.0187	0	0	0	0	0	0	0	0	0	0.0519	0.0397	0	0.0636	0.1067	0	0	0.0914	0.0669	0.1264	0	0	0	0	0	0	0.0518	0.1087	0.0986	0.0452	0.1174	0.0838	0	0.135	0.0985	0	0	0	0	0.1064	0	0	0	0.0483	0	0	0
3.1016	75.7667	0	0	0	0	0	0	0	0	0	0	0.0358	0	0.0407	0	0	0.1089	0	0	0	0.0936	0	0	0	0	0	0.0968	0	0.0501	0.1042	0.0765	0	0	0.0831	0	0.1306	0	0	0	0	0	0	0	0	0	0	0	0	0
3.0976	75.7073	0	0	0.1332	0	0	0	0	0	0	0	0.0397	0.0317	0.0515	0	0	0.1385	0	0.0804	0	0.0572	0	0	0	0	0	0	0	0.0622	0.0387	0.1049	0.0486	0.0669	0	0	0	0	0	0.0579	0.0264	0	0.124	0.0787	0	0.0457	0	0	0	0.0315
1.0746	74.0972	0	0	0	0	0	0	0	0	0	0	0	0	0	0	0	0	0	0	0.682	0	0	0	0	0.3677	0	0	0	0	0	0	0	0	0	0	0	0	0	0	0	0	0	0	0	0	0	0	0	0
0.4363	784.648	0	0	0	0	0	0	0	0	0	0	0	0.239	0	0	0	0	0	0	0	0	0	0.1065	0.1465	0	0	0	0	0	0	0	0	0	0	0	0	0.0522	0	0	0	0	0	0	0	0.3213	0	0	0	0
3.0821	784.587	0	0	0.829	0	0	0	0	0.1887	0.0999	0	0.1559	0.1964	0.1914	0.2447	0.1441	0.1585	0	0.1513	0	0.106	0	0	0.1435	0	0.1553	0.1849	0	0	0.0147	0	0.0996	0	0.1304	0	0.1626	0	0.2601	0	0	0.085	0.2021	0	0.1121	0.4037	0.2061	0	0.1542	0.2297
0.6512	784.488	0	0	0	0	0	0	0	0	0.1147	0	0	0	0	0	0	0	0	0.3204	0	0	0	0	0.189	0.1175	0.2535	0	0.3557	0.1118	0.0889	0.1471	0	0	0	0	0	0	0	0	0	0	0	0	0	0	0	0	0	0
0.5664	783.667	0	0	0	0	0	0	0	0	0	0	0	0	0	0	0	0.1079	0	0.0958	0	0	0.0613	0	0	0	0	0	0	0.3127	0	0.0757	0.0724	0	0.084	0	0	0.0518	0	0	0	0.0664	0	0	0	0	0	0	0	0
0.4383	782.135	0	0	0	0	0	0	0	0	0	0	0	0	0	0	0	0.0782	0	0	0	0	0.0895	0	0	0	0	0	0	0	0	0	0	0	0	0	0.0716	0	0	0.2395	0.7329	0	0	0	0.2816	0	0	0	0	0
0.4264	781.207	0	0	0	0	0	0	0	0	0	0	0	0	0	0	0	0	0	0	0	0	0	0	0	0	0	0	0	0.0354	0	0	0	0	0	0.1954	0	0	0	0	0	0	0	0	0	0	0	0	0	0
3.0859	780.636	5.1513	0	0	0	0	0	0	0.4722	0	0	0	0.3891	0.2413	0	0	0	0	0	0	0	0	0	0	0	0.1215	0.0435	0	0	0	0	0.0975	0	0	0	0.0997	0	0	0	0.2867	0.172	0	0.0359	0.3065	0.4891	0	0	0	0.4703
0.8626	780.629	0	0	0	0	0	0	0	0.189	0	0	0	0	0	0.1466	0	0	0	0.1427	0	0	0	0	0	0	0	0	0	0	0	0	0	0	0	0	0	0	0	0	0	0	0	0	0	0	0	0	0	0
0.5806	780.628	70.1608	59.6716	0	0	0	0	0	0.4829	0.1573	0	0	0	0	0.507	0	0	0	0	0	0	0	0	0.1264	0	0.2404	0	0	0	0	0	0.1489	0.1876	0	0	0	0	0	0	0	0.0808	0	0.1584	0	0	0	0	0	0.2944
3.0851	778.637	0	0	0.0153	0	0	0	0	0.3157	0.778	0.7787	0.5817	0.5857	0.6899	0.5431	0.334	0.1312	0.2029	0.2725	0.4489	0.3049	0.4581	0.3967	0.1622	0.0326	0.3663	0.4948	0.4741	0.1454	0.2962	0.379	0.2479	0.1904	0.4282	0.6186	0.1291	0.2539	0.7732	0.5688	0.4443	0.3241	0.501	0.6769	0.6102	0.8703	0.6698	0.5855	0.9392	0.875
0.4966	778.516	0	0	0	0	0	0	0	0	0	0	0	0	0	0	0	0	0	0	0	0	0	0	0	0	0	0	0	0	0	0	0	0	0	0	0	0	0	0.2353	0	0	0	0	0	0	0	0	0	0
1.5313	778.266	0	0	0	0	0	0	0	0.0965	0	0	0	0	0	0.0629	0	0	0	0	0	0	0	0	0.0733	0	0	0.1477	0	0	0	0.0813	0.0913	0	0	0.1221	0	0	0.1955	0	0	0	0.1404	0	0	0	0	0	0	0
0.5403	778.17	0	0	0	0	0	0	0	0	0	0	0	0	0	0	0	0	0	0	0	0	0	0	0	0	0	0	0	0.1025	0.088	0	0	0.0998	0	0	0	0	0	0	0	0.1037	0	0	0	0	0	0	0	0
0.5485	777.673	0	0	0	0	0	0	0	0	0	0	0.1271	0	0.1481	0.1228	0	0.0752	0	0	0	0.0495	0	0	0	0.0489	0	0	0	0	0	0.1084	0	0	0	0	0.1374	0	0	0	0	0	0.1018	0	0	0	0	0	0	0
1.6394	777.51	0	0	0	0	0	0	0	0	0	0	0	0	0	0	0	0	0	0	0	0	0	0	0	0	0	0	0	0	0	0	0	0	0	0	0.2171	0	0	0	0.1175	0	0	0	0	0	0	0	0	0
0.5568	777.176	0	0	0	0	0	0	0	0.1715	0	0.1373	0.164	0.1568	0.1192	0.1269	0.3678	0.3797	0.2596	0.2852	0	0.1666	0.3055	0	0	0	0.1025	0	0.0995	0.8612	0.3189	0.3317	0.6072	0.2862	0.3303	0	0.3838	0.6599	0	0.0561	0	1.0101	0	0.229	0.5552	0	0	0	0.147	0
0.9648	384.22	0	0	0	0	0	0	0	0	0	0	0	0	0	0	0	0	0	0	0	0	0	0	0	0	0	0	0	0	0	0	0	0	0	0	0	0	0	0	0	0	0	0.6499	0	0	0	0	0	0
0.615	384.218	0	0	0	0	0	0	0	0	0	0	0	0	0	0	0	0	0	0.1527	0	0	0	0	0	0	0	0	0	0	0.115	0	0.1638	0	0	0	0	0	0	0	0	0	0	0	0	0	0	0	0	0
3.2179	384.213	0	0	0.5812	0	0	0	0	0	0	0.0158	0.0272	0	0	0	0.0605	0	0	0.5305	0	0	0	0.0323	0.3273	0.2351	0	0.3593	0	0.0652	0	0.3081	0.0297	0	0	0.3095	0	0.3857	0	0.0122	0	0.0487	0	0.4665	0	0	0	0	0.3857	0
0.946	384.151	0	0	0	0	0	0	0	0	0	0	0	0	0	0	0.2322	0	0	0	0	0	0	0	0	0.1135	0	0	0.1194	0.1732	0.1742	0	0.128	0.2535	0	0.1312	0	0.1525	0	0	0	0	0.2097	0	0	0	0	0	0	0
0.5548	384.111	0	0	0	0	0	0	0	0	0	0	0	0	0	0.1556	0	0	0	0	0	0	0	0	0	0	0	0	0	0	0	0	0	0	0	0.5301	0	0	0	0	0	0	0	0	0	0	0	0	0	0
3.0552	383.871	0	0	0	0	0	0	0	0.2267	0.1712	0.2392	0.2163	0.1848	0	0	0.6885	0.1202	0.9307	0.0685	0	0.1962	0	0.2454	0.9812	0	0.0338	0.095	0.1035	0.3766	0.1127	0.0979	0.187	0	0.2414	0.2836	0.3717	0.0612	1.9228	0.1461	0.1427	0	0.3223	0.1822	0	0	0.0642	0	0	0
0.453	383.324	0	0	0	0	0	0	0	0	0	0	0	0	0	0	0	0	0	0	0	0	0	0.1679	0	0	0	0	0	0	0.0546	0	0	0	0	0	0	0	0.1721	0	0.1778	0	0	0	0	0.5244	0	0	0	0
2.1977	383.224	0	0	0	0	0	0	0	0	0	0	0	0.3311	0	0	0	0	0	0.3669	0	0	0	0.1588	0.2384	0.2227	0	0	0.6348	0	0.0691	0.203	0.147	0	0.1314	0.2087	0	0	0	0	0.2056	0	0	0	0	0	0.2061	0	0	0
1.1936	383.213	0	0	0	0	0	0	0	0	0.1338	0	0	0	0.2365	0	0	0	0	0.1577	0.2947	0	0	0	0.0713	0	0	0.3537	0	0.2595	0	0	0	0	0	0	0	0.3057	0.1978	0	0	0	0	0	0	0	0	0	0	0
1.9423	383.205	0	0	0	0	0	0	0	0	0	0	0.1453	0	0	0	0	0	0	0	0	0	0	0	0	0	0	0	0	0	0	0	0	0	0	0	0	0	0	0	0	0	0	0	0.2698	0	0	0	0	0
0.7175	383.205	0	0	0	0	0	0	0	0	0	0	0	0.3508	0	0	0	0	0	0	0	0	0	0.1939	0.1719	0.2281	0	0	0	0	0	0	0.1175	0	0	0	0	0	0	0	0	0	0	0.6773	0	0	0	0	0	0.2975
2.8233	383.205	0	0	50.7253	0	0	0	0	0	0	0	0	0	0	0.1106	0.0331	0.255	0	0	0	0.2314	0	0	0	0	0	0	0	0	0	0	0	0	0	0	0	0	0.0607	0.4848	0.0869	0	0	0	0.1368	1.2182	0	0	0.0108	0
0.9572	383.194	0	0	0	0	0	0	0	0	0	0.3566	0	0	0.3546	0.0267	0.6008	0	0.0611	0	0.3864	0.7083	0	0.2427	0	0.198	0.4877	0.5472	0	0.3654	0	0	0	0	0.1534	0	0	0.2023	0	0	0	0	0	0	0	0	0.7115	0	0	0.104
0.598	383.189	0	0	0	0	0	0	0	0	0	0	0	0	0	0	0	0	0	0	0	0.0798	0	0.1417	0	0	0	0	0	0	0	0	0	0.0624	0	0	0	0	0	0	0.2414	0	0	0	0	0	0	0	0	0
0.4969	383.149	0	0	0	0	0	0	0	0	0	0	0	0	0	0	0	0	0	0	0	0	0	0	0	0	0	0	0	0	0	0	0	0	0	0	0	0	0	0	0.1877	0	0	0	0	0	0	0	0	0
0.6678	383.147	0	0	0	0	0	0	0	0	0	0	0	0	0	0	0	0	0	0	0	0	0	0	0	0.1154	0	0	0	0	0	0	0	0	0	0	0	0	0	0	0	0.0651	0	0	0	0	0	0	0	0
0.4691	237.091	0	0	0	0	0	0	0	0	0	0	0	0	0	0	0	0	0	0	0	0	0	0	0	0.6038	0	0	0.1153	0	0.7204	0	0	0	0	0	0	0	0	0	0	0.7104	0	0	0	0	0	0	0	0
1.8248	237.091	0	0	0	0	0	0	0	0.324	0.3529	0.1375	0.6063	0.3096	0.7659	0	0	0	0	0	0	0	0.6792	0	0	1.4671	0	0	4.0625	0	8.9592	0	0	0	0	0	0	1.1117	0	0	0	9.1483	0	0	0	0	0	0	0	0
0.6474	237.076	0	0	0	0	0	0	0	0.4243	0.415	0	0.2932	0	0	0.1962	0	0	0	0	0.3446	0	0.2125	0.3316	0	0	0.3178	0.3254	0.2904	0.1777	0.0588	0.3154	0.2046	0	0.1536	0	0	0.103	0	0.3461	0.3145	0.0634	0.0906	0	0	0	0	0.3749	0	0
1.0496	237.074	0	0	0	0	0	0	0	0.121	0	0.1036	0	0.4441	0	0.3195	0.6704	0.2096	0.3716	0.2174	0	0.3219	0.5433	0	0	0.2916	0.2065	0	0.4335	0.6222	0.4901	0.3157	0.0258	0.8243	0	0	0.189	0.9146	0	0.2109	0	0.6505	0	0	0	0	0	0	0	0
0.883	237.071	0	0	0	0	0	0	0	1.8313	1.8262	1.748	1.5103	1.4031	2.1985	1.2342	2.1188	1.265	1.5716	1.7858	1.5847	1.5611	2.5046	0.9435	0.7051	0.5697	1.1711	0.3784	1.2921	6.2315	2.4516	2.8336	7.0345	6.3034	0.9071	0.4425	1.9129	8.4684	0	2.7595	0.7706	1.7417	1.043	0.8272	1.0484	0	1.1815	0.4861	0.4094	0.3846
3.4693	237.055	0	0	0	0	0.2909	0	0	0.2816	0.2433	0.2693	0.2541	0.2326	0.226	0	0.4425	0.1221	0.2772	0	0.5137	0.1814	0.1729	0.3077	0.361	0.3254	0.4652	0	0.4127	0	0.2587	0.3196	0.1626	0.3186	0.2748	0.1808	0.1746	0.1073	0.4912	0	0.6087	0.2131	0.3366	0.2132	0	0.2027	0.2025	0.3736	0	0
0.4603	236.945	0	0	0	0	0	0	0	0	0	0	0	0	0	0	0	0	0	0	0	0	0	0	0	0	0	0	0	0	0	0	0	0	0	0	0	0	0	0	0	0	0	0	0	0	0.0834	0.1344	0	0
3.032	236.897	0	0	0	0	0	0	0	0.1522	0	0	0	0	0	0.1539	0.1531	0	0	0.1933	0	0.1375	0.1071	0.1896	0.1227	0.1186	0.2128	0	0	0.1086	0	0	0.1351	0	0	0	0	0	0	0	0	0	0	0	0	0	0	0	0	0
0.5926	236.149	0	0	0	0	0	0	0	0.3365	0.3932	0.3739	0	0	0.2113	0.3209	0.6213	0.714	0.1088	0.3492	0.3227	0.6448	0.1048	0	0	0.7686	0.1479	0	0.3193	0.2654	0.3567	0.2347	0.1506	0.5455	0.1482	0.11	0.5482	0	0	0.4259	0.1394	0.1588	0	0	0	0	0.2476	0.3383	0	0.1708
0.908	236.138	0	0	0	0	0	0	0	0	0	0	0	0	0	0.363	0	0	0	0	0	0	0	0	0.2619	0	0.1722	0.187	0	0	0.176	0	0.188	0	0.2655	0	0	0	0	0	0	0.0498	0	0	0	0	0	0	0	0.2684
1.7597	236.126	0	0	0	0	0	0	0	0.3572	0	0	0	0	0	0	0	0	0	0	0	0	0	0	0	0	0	0	0	0	0	0	0	0	0	0	0	0	0	0	0	0	0	0	0	0	0.4381	0	0	0
0.8637	236.092	0	0	0	0	0	0	0	0	0	0	0	0	0	0.2015	0.179	0	0.2675	0	0.4392	0.4182	0	0	0.5741	0.4704	0.3735	0	0.0608	0.3133	0.2473	1.0476	0.1788	0.3006	0.4008	0	0.4666	0	0	0.202	0	0.1263	0.4616	0	0	0	0	0	0	0
1.0981	236.089	0	0	0	0	0	0	0	0	0	0	0	0	0	0.2273	0	0.1916	0.1485	0	0	0.3844	0	0	0	0	0	0	0	0.0954	0	0	0	0.1316	0.4287	0	0.1431	0	0	0	0	0.1136	0	0	0	0	0	0	0	0
2.994	236.078	0	0	0	0	0	1.4631	0	0	0.1995	0.1877	0.1782	0.185	0	0.1718	0	0	0	0.2415	0.1883	0	0	0	0	0.0486	0.1385	0.1768	0.3098	0.2037	0.0966	0.1654	0.1558	0.2344	0.1963	0.5325	0.2315	0.0598	0.1637	0.6178	0.1873	0	0.1961	0.0885	0	0	0	0	0	0
2.3412	236.038	0	0	0	0	0	0	0	0.4513	0.5645	0.5687	0.6424	0.5668	0.4039	0.5882	0.4462	0.5583	0.714	0.4621	0	0.4093	0.94	0	0	0.286	0.3882	0	0.4465	1.3022	0.9284	0.6299	0.9309	1.2639	0.7875	0	0.8669	0.9368	0	0.7693	0	0.8367	0	0.3805	0.7799	0	0.4657	0	0.3403	0.5697
2.0415	236.07	0	0	0	0	0	0	0	0	0	0	0	0	0	0	0.0999	0	0	0.1093	0.1599	0	0	0.1368	0.1913	0.1632	0.1601	0.1536	0.1017	0.5714	0.352	0.4135	0.1888	0.2121	0	0	0.2375	0.1396	0	0	0.1578	0.099	0.3249	0	0	0	0	0	0	0
2.4671	80.0497	0	0	0	0	0	0	0	0.2256	0	0	0	0	0	0.3433	0.2483	0.3377	0.3141	0.194	0.413	0	0.1764	0.2716	0.1954	0.2215	0.298	0.256	0.1955	0.1976	0.2209	0.228	0.2487	0.3343	0.2418	0.3429	0.2636	0.2173	0.2625	0.2484	0.255	0.1307	0.2587	0	0	0	0.209	0.2552	0	0
2.0799	79.8694	0	0	0	0	0	0	0	0	0	0	0	0	0	0	0.0924	0	0	0	0	0	0	0	0	0	0.1238	0	0	0	0	0	0	0	0	0.1492	0	0	0	0	0	0	0	0	0	0	0	0	0	0
2.6795	79.0551	0	0.125	0	0	0	0.0978	0.4198	0	0	0	0.0062	0	0	0	0.6384	0.468	0.4514	0	0.6428	0	0.1947	0	0	0	0.3454	0.4463	0	0.124	0.3238	0.2442	0	0	0.0442	0	0.1666	0.1212	0	0	0	0.0157	0	0	0.0216	0	0	0	0	0.0343
1.6253	79.055	0	0	0	0	0	0	0	0	0	0	0	0	0	0	0	0	0.1823	0	0	0	0	0	0	0	0	0	0	0	0	0	0	0	0	0	0	0	0	0	0	0	0	0	0	0	0.4776	0	0	0
2.0988	79.0545	0	0	0	0	0	0	0	0	0	0	0.5199	0	0	0	0	0	0	0	0	0	0	0	0	0	0	0.5341	0.3396	0	0.2009	0	0	0	0	0	0	0	0	0	0	0	0	0	0	0	0	0	0	0
0.668	79.0542	0	0	0	0	0	0	0	0	0	0.5464	0	0	0	0.5101	0	0.2753	0.3699	0.282	0.3445	0	0.252	0.3839	0.3566	0.2043	0	0.3947	0.3301	0.2239	0	0.1723	0	0.3742	0.221	0	0.2943	0	0	0.4613	0.419	0.3046	0.5569	0.5259	0	0	0	0	0.7307	0.4928
0.4887	79.0538	0	0	0	0	0	0	0	0.2353	0.2985	0	0.3387	0	0	0	0.2334	0.2983	0.2053	0.355	0.9269	0.7147	0.6424	0.6895	0.5696	0.3289	0.389	0.7502	0	0.3864	0.04	0.3338	0	0.688	0.2607	0.4712	0.4275	0.6154	0.559	0.3823	0.6012	0	0.2565	0	0	0	0.552	0.6746	0.4954	0.4283
0.5442	78.715	0	0	0	0	0	0	0	0	0	0	0	0	0	0	0	0.0594	0	0	0	0	0	0	0	0	0	0	0	0.0568	0	0	0	0	0	0	0	0	0	0	0	0	0	0	0	0	0	0	0	0
1.9436	78.0343	0	0	0	0	0	0	0	0	0	0	0	0	0	0	0	0	0	0	0	0	0	0.3341	0	0	0	0	0	0.2968	0	0	0	0	0	0	0	0	0	0	0	0.066	0	0	0	0	0	0	0	0
1.4409	78.034	0	0	0	0	0	0	0	0.2826	0.2486	0.262	0.2736	0.2884	0.2812	0.6103	0.2581	0.2968	0.2048	0.2363	0.4288	0	0.1847	0.3938	0.4209	0.2942	0.3633	0.4186	0.154	0.3119	0.2627	0	0.2761	0.2896	0.3818	0.5351	0.273	0.2823	0.3711	0.3055	0.3034	0.1762	0.348	0	0	0.2809	0.1757	0.2657	0	0
2.4954	78.0339	0	0	0	0	0	0	0	0.2122	0.2854	0.2094	0	0.2487	0.2506	0.4277	0.3422	0.3718	0.2484	0	0.2674	0.3731	0	0.4327	0.2292	0.2425	0	0.2989	0	0.3208	0.2849	0.226	0.2081	0.3724	0.2939	0.4384	0.2379	0.1806	0	0.3221	0.2243	0.1229	0.3659	0	0	0	0.2674	0	0	0
2.6671	77.0397	0	6.6637	0	0	0	4.1683	0	0	0	0.0096	0	0.1065	0	0.0197	0.0068	0.0097	0	0.1608	0	0	0	0	0	0	0	0	0	0	0	0.6419	0	0	0	0	0	0	0	0	0	0.0001	0	0	0	0	0	0.0184	0	0
0.6801	77.0391	0	0	0	0	0	0	0	0	0	0	0	0	0	0	0	0	0	0	0	0.1859	0	0	0.3172	0	0	0	0	0.1591	0.2754	0	0	0	0.2271	0	0	0	0	0	0.3078	0	0	0	0	0	0.2856	0	0	0
1.3426	77.0389	0	0	0	0	0	0	0	1.4904	1.6221	1.3653	1.5064	1.5106	1.7667	3.8411	1.3923	0.9727	0.7807	0.6035	0.752	4.1843	1.2613	1.264	2.0891	0.7034	0.5057	1.3687	0	1.204	0.4071	2.0995	0.7799	0.4758	0.9427	1.491	0.8108	1.1451	1.5602	0.6604	2.5041	0.7011	2.3949	2.0221	1.0611	2.6871	1.0058	1.4033	2.5354	2.4046
2.0381	77.0388	0	0	0	0	0	0	0	0	0	0	0	0	0	0	0	0	0	0	0	0	0	0	0.3585	0	0	0	0	0	0.1454	0	0.2109	0	0	0	0	0.4567	0	0	0	0	0	0	0	0	0	0	0	0
1.5412	77.0388	0	0	0	0	0	0	0	0	0	0.2525	0	0	0.4832	0	0	0	0	0	0	0.1048	0.3804	0	0	2.3725	0	0	0.2253	0.1151	2.8509	0	0	0	0	0	0	0.5186	0	0	0	2.448	0.2965	0	0	0	0	0	0	0
3.1025	793.604	0	0.8499	0	0	0	0	0	0.2371	0.1445	0	0	0	0	0	0	0	0	0	0	0	0	0	0	0.0625	0.1311	0	0.0225	0	0	0	0	0	0	0	0	0	0.1526	0.0575	0	0	0	0	0.1611	0	0	0	0.158	0
2.0599	793.566	0	0	0	0	0	0	0	0	0.2543	0	0	0.2015	0.2745	0.2826	0.1965	0.2372	0.3693	0.2195	0.1289	0.1959	0.2319	0.1611	0.1458	0	0.3236	0.2648	0	0	0	0.1437	0.1469	0.1763	0.2461	0.1001	0.1326	0	0.3851	0.2761	0.263	0.0688	0.4056	0.2639	0.2715	0.3881	0.393	0	0.1797	0.4128
0.5043	793.134	0	0	0	0	0	0	0	0	0	0	0	0	0	0	0.0663	0	0.1326	0.0656	0	0	0.0604	0	0	0.0535	0	0	0	0.5074	0.4459	0.0849	0.1071	0.2372	0.2172	0	0.0718	0.4862	0	0	0	0.484	0	0	0	0	0	0	0	0
3.0753	792.605	0	0	0	0	0	0	0	0.4569	0.2117	0.1769	0	0	0.0538	0.23	0.1695	0.0874	0.1222	0.1867	0.2878	0.1035	0.1237	0.1193	0.1553	0.0202	0.103	0.1724	0	0	0.1027	0	0.0439	0.1563	0	0.2602	0	0	0.1168	0.0409	0.2211	0	0.2655	0.2735	0.3112	0.2371	0	0	0	0
2.0578	792.568	0	0	0	0	0	0	0	0.2083	0.1827	0.1633	0.204	0	0.2064	0.2511	0.1816	0.1458	0.0639	0.2708	0.2223	0.0481	0.3335	0.1379	0.0968	0	0.2878	0.2835	0.0871	0	0	0	0.063	0.15	0	0.3905	0.1599	0.1205	0.3359	0.3401	0	0	0.4895	0.2731	0.2176	0	0.2836	0	0	0.3955
0.4704	792.566	0	0	0	0	0	0	0	0	0	0	0	0	0	0	0.0898	0	0	0	0	0.0473	0.1238	0	0	0.0649	0	0	0.0668	0	0	0	0.0347	0	0.0895	0	0.0698	0	0	0	0	0	0	0	0	0	0	0	0	0
1.7709	792.504	0	0	0	0	0	0	0	0	0	0	0	0	0	0	0	0	0	0	0	0	0	0	0	0	0	0	0	0	0	0	0	0	0	0	0	0	0	0	0	0	0	0	0	0	0	0	0	0
1.4302	792.377	0	0	0	0	0	0	0	0	0	0	0	0	0	0	0	0	0	0	0	0	0	0	0.1071	0.0688	0	0	0	0	0	0	0.0512	0	0	0	0	0	0	0	0.1281	0	0	0	0	0	0	0	0	0
0.5622	792.182	0	0	0	0	0	0	0	0.2004	0.1952	0.2137	0.2252	0.2625	0.2621	0.1966	0.6832	0.587	0.4815	0.6256	0	0.3627	0.4885	0	0	0	0.2184	0	0.176	1.9133	0.6192	0.7458	1.214	0.5114	0.7717	0	0.5045	1.1312	0	0.1255	0	1.4542	0.0808	0.3945	0.6761	0	0	0	0.3445	0
2.0602	791.57	0	0	0	0	0	0	0	0	0.1394	0	0	0.2184	0.3081	0.2128	0.1038	0.2754	0.0945	0.2223	0.155	0.1255	0.206	0	0.227	0	0.1615	0.2878	0.1049	0.0776	0	0.1317	0	0.1674	0.2017	0.3081	0.1705	0.0759	0.3281	0.1856	0	0	0.1252	0.1859	0	0	0.1952	0	0	0.2983
0.4471	790.586	0	0	0	0	0	0	0	0.1818	0.1621	0.1718	0.1434	0.2044	0	0	0.11	0	0.057	0	0	0.1134	0.0871	0	0	0.0583	0.0858	0	0.1285	0.0515	0	0.0725	0	0.565	0.1107	0.1443	0.0908	0	0.1432	0.5597	0	0	0.1722	0.187	0	0.3129	0.1105	0	0.1555	0.1377
2.0637	790.571	0	0	0	0	0	0	0	0	0	0	0	0	0	0.1577	0.1561	0	0	0.1198	0	0	0	0.1166	0	0	0	0	0	0.0627	0	0	0	0	0	0	0	0	0.1642	0	0.1356	0	0.3365	0	0	0.2598	0	0	0	0
1.6067	790.274	0	0	0	0	0	0	0	0	0	0	0	0	0	0	0	0	0.1392	0	0.2815	0.068	0	0	0.1179	0	0	0	0	0.0691	0	0	0.07	0	0	0	0	0	0	0	0.11	0	0	0	0	0	0	0	0	0
3.0851	786.591	0	0.015	0	0	0	0	0	0.235	0.2705	0	0.0308	0.0215	0.2696	0.2571	0	0.2234	0	0.1545	0.0174	0	0.1833	0.1309	0.1297	0	0.142	0.1664	0.1216	0.0234	0	0.1609	0.0658	0	0.196	0.1772	0	0	0.2495	0.2459	0.183	0	0	0.2108	0	0.2924	0.2518	0	0.2693	0.272
0.5372	785.165	0	0	0	0	0	0	0	0	0	0	0	0	0	0	0	0	0.1018	0	0	0	0	0	0	0	0	0	0	0.1055	0	0	0	0	0	0	0	0	0	0	0	0	0	0	0	0	0	0	0	0
3.0633	784.688	0	0	0	0	0.1078	0	1.4402	0	0	0	0.1266	0	0.1024	0	0	0	0	0	0.2157	0	0	0.3807	0.0076	0	0.1502	0	0.0998	0.1275	0	0.0994	0.1468	0	0.0092	0.2201	0.0828	0.1926	0.0872	0.0945	0.1919	0	0	0	0	0	0	0	0	0
2.2285	385.206	0	0	0	0	0	25.3473	0	14.3761	13.6766	12.4389	13.8536	12.5352	12.3673	18.5844	4.7529	6.9023	11.703	75.9466	12.4911	3.7771	7.1937	27.2081	38.9336	29.2844	21.04	19.6427	89.7026	6.6446	26.5661	30.1871	19.715	4.1857	21.4424	27.2607	8.4355	6.7965	15.957	4.1627	27.3254	12.2431	2.3857	1.1083	1.4323	3.8214	27.9554	4.0033	2.018	1.9021
0.7195	385.192	0	0	0	0	0	0	23.6168	0	0	0	0	0	0.1465	0.0877	0	0.2583	0	0	0	0	0.0676	0.5018	0.2282	0.3162	0	0	0.2607	0.2223	0.3013	0.3562	0.2708	0.2496	0	0	0	0.2899	0	0	0.6898	0.4408	0	0	0	0	0	0	0.5051	0
1.7346	385.188	0	0	0	0	0	0	0	0	0	0	0	0	0	0	0	0	0	0	0	0	0	0	0	0	0	0	0	0	0	0	0	0	0	0	0	0	0	0	0	0	0	0	0	0	0.417	0	0	0
0.9245	385.187	0	0	0	0	0	0	0	0.4074	0	0	0	0	0	0.7099	0.1912	0.392	0.4913	0.0504	0	0.4147	0.3332	0.5753	0	0	0	0.3826	0.2561	0	0.1679	0.4469	0.3685	0.2517	0	0.5764	0	0.3685	0.0441	0	0.4649	0	0	0	0.6836	0.7279	0.9556	0	0	0.8576
2.933	385.186	0	0	0	0	0	0	0	0	0	0	0.0304	0	0	0	0	0	0	0	0.0538	0	0	0	0	0.0438	0.0659	0	0	0	0	0.3863	0	0	0	0	0	0	0	0	0	0	0	0	0	0.1412	0.1629	0.0923	0.0016	0
2.4302	385.201	0	0	0	0	0	0	0	0	0	0	0.3022	0.1348	0.1242	0	0	0	0	0.258	0	0	0	0	0.2226	0	0	0.426	0.6129	0.0654	0.235	0	0.1861	0	0.0704	0.2752	0	0	0.3173	0	0.1031	0.1268	0	0	0	0	0.3993	0	0	0.3065
1.1395	385.182	0	0	0	0	0	0	0	0	0.1501	0.3253	0	0.2456	0.2804	0.6474	0	0.2353	0	0	0.2261	0.079	0.1005	0.3661	0	0.0758	0.4359	0.6634	0	0	0.257	0	0	0	0	0.3324	0.0649	0	0.4943	0	0.4215	0	0.1082	0.3765	0.1964	0.721	0.561	0.8191	0.5723	0.0938
0.307	385.181	0	0	0	0	0	0	0	0	0	0	0	0	0	0	0	0	0	0	0	0	0	0	0	0	0	0	0	0.1137	0	0	0	0	0	0	0	0	0	0	0	0	0	0	0	0	0	0	0	0
2.7648	385.179	0	7.7806	35.707	0	0	1.8158	0	0.25	0	0.4209	0	0	0	0	0	0	0	0	0	0.24	0	0	0.1619	0	0.0159	0	0	0	0	0.2173	0	0	0	0	0	0	0	0	0	0	0	0	0.0916	0	0	0	0	0
3.1488	385.172	0	5.1168	0	0	0	30.6552	3.8288	0.7237	0	0.332	0.7751	0.2278	1.4639	0.057	0.9988	0.2421	0.226	0.4604	0.3046	0	0.6753	0.492	1.1753	0.0275	0	1.432	0.0302	0.2932	0.1408	0.568	0.6519	0.1909	0	1.7724	0.1958	0.7398	0	0.1144	0.3138	0	0.2745	0.3742	1.4988	0.432	0.0931	0.2044	0	0.1546
2.0429	385.149	0	0	0	0	0	0	0	0	0.1852	0	0.2071	0	0.3056	0	0	0.119	0	0	0	0	0.2923	0	0.4347	0.9855	0.1625	0.2824	0.1843	0.4589	0.2031	0.2218	0.4035	0.2463	0.1458	0	0.1529	0.2192	0.2337	0.1079	1.0154	0.7277	0	0	0	0	0	0	0	0
3.4341	385.126	0	0	0	4.7907	0	0	0	0.7086	0.751	0.7645	0.7617	0.858	0.775	0	0.2762	0.4013	0.2029	0.0972	0.1007	0.3999	0	0	0.3416	0.51	0	0	0	0.0645	0	0	0.0822	0	0.0936	0	2.3082	0	0.1167	0.0039	0	0	10.3514	1.0282	1.6269	4.3221	2.3011	2.8877	0	0
0.4731	384.294	0	0	0	0	0	0	0	0.1827	0.1579	0.1288	0.225	0.1827	0.1742	0	0	0	0	0	0	0	0	0	0	0	0	0	0	0	0	0	0	0	0	0	0	0	0	0	0	0	0	0	0	0	0	0	0	0
1.4118	384.274	0	0	0	0	0	0	0	0	0	0.3509	0.3523	0.231	0	0	0.3978	0.2098	0	0.3707	0.6636	0.8242	0.2725	0.2455	1.0969	0.1202	1.0293	0	1.4971	0	0	0.1419	0	0.5765	0.2609	0.1855	1.0734	0.0903	0.4648	0.2162	0.3613	0.5399	0	0	0	0	0.3102	0	0.3648	0
1.7596	384.274	0	0	0	0	0	0	0	0.1447	0	0	0.5008	0.4263	0.2004	0.7846	1.3735	0.7183	0.2887	0.668	2.1257	0.3728	0	0.9982	0.283	0.2224	0.4067	0	0.6711	0.7006	0.6825	0.6427	0.1333	0.9479	0.9322	0.4623	0.3765	0.1719	0.463	0.3289	0.3652	0.2546	0	0	0	0	0.4293	0.2859	0	0
1.9782	384.235	0	0	0	0	0	0	0	0	0	0	0	0	0	0	0.1607	0	0	0	0	0	0	0	0.0949	0.2828	0	0	0	0	0.1988	0	0	0	0	0	0	0	0	0	0	0.129	0	0	0	0	0	0	0	0
1.7122	238.107	0	0	0	0	0	0	0	0.3424	0.5529	0.3539	0	0	0	0.3343	0.2901	0	0	0.1286	0	0	0.0806	0	0	0	0	0	0	0	0	0.544	0	0	0	0	0	0	0	0.5299	0.1373	0	0	0	0	0	0	0	0	0
1.9386	238.103	0	0	0	0	0	0	0	0	0	0	0	0	0	0	0	0	0.1707	0	0	0	0	0	0	0	0	0	0	0	0	0	0	0	0	0	0	0	0	0	0	0	0	0	0	0	0	0	0	0
1.0596	238.096	0	0	0	0	0	0	0	0	0	0	0	0	0	0	0	0	0.1732	0	0.6527	0.108	0	0.5678	0.7066	0	0.4578	0.1578	0.3538	0	0.1271	0	0	0.1063	0.2835	0.1726	0.2321	0	0.4261	0	0	0	0	0	0	0	0	0	0	0.2959
2.3603	238.094	0	0	0	0	0	0	0	3.8224	3.4022	2.9052	3.2467	3.0304	3.4939	3.4225	5.0953	7.1201	3.6582	3.8821	6.4277	7.17	1.817	5.043	4.4238	4.9329	5.3433	3.8634	3.601	4.1679	3.2865	4.1981	2.7937	4.1341	3.4201	3.3833	2.9309	3.2274	5.5414	4.7642	4.2147	1.3757	2.2849	1.4267	0.7507	2.6882	2.829	0	1.3764	0.9279
0.5842	238.093	0	0	0	0	0	0	0	0	0	0	0	0	0	0	0	0	0	0	0	0	0	0	0	0.0788	0	0	0.1152	0.2683	0	0	0	0	0	0	0	0	0	0	0	0	0	0	0	0	0	0	0	0
1.4997	238.091	0	0	0	0	0	0	0	0.1206	0.2325	0.3605	0.3447	0.3177	0.3679	0.4343	0.302	0.4742	0.3649	0.2814	0.1947	1.0086	0.2514	0.3362	0.303	0.1791	0.2797	0.3188	0.6477	0.194	0	0.2	0.2282	0.5136	0	0.7432	0.4508	0.3461	0.1476	0.4981	0.2281	0	0.4638	0	0.4606	0.5713	0.377	0.3798	0.7618	0.5301
1.6099	238.014	0	0	0	0	0	0	0	0	0	0	0	0	0	0.2546	0	0	0	0	0	0.0778	0	0	0	0	0	0	0	0	0	0.096	0	0	0.0697	0.2353	0	0	0	0	0	0	0	0	0	0	0	0	0	0
3.2671	237.988	0	0	0	0	0	0	0.2727	0	0	0.1691	0.385	0.3006	0	0.277	0	0.7946	0.6418	0.9304	1.1561	1.2462	0	0.7337	0	0	0.9882	1.1806	0.366	1.7915	2.953	1.1008	0.7701	1.8844	1.3612	0.9129	1.5948	1.6549	1.0741	0	0	0	0	0.3279	0.0767	0.2139	0.146	0.1196	0	0
1.8124	237.175	0	0	0	0	0	0	0	0	0	0	0	0	0	0	0	0	0	0	0	0	0	0	0	0	0	0.6168	0	0	0	0	0	0	0.1201	0	0.1977	0	0.3402	0	0.6579	0	0	0	0	0	0	0	0	0.2434
1.9509	237.142	0	0	0	0	0	0	0	0.2732	0	0	0	0	0	0	0	0.133	0.267	0	0	0.53	0	0	0	0.1816	0	0.3115	0	0.6574	0	0.5422	0.5237	0.186	0	0	0	0.3915	0.3465	0.402	0.1967	0	0	0	0	0	0	0	0	0
0.5952	237.141	0	0	0	0	0	0	0	0.5388	0.5665	0.3439	0.3928	0.3722	0.6092	0.1589	0.9957	0	0.431	0.5207	0.3417	0.4916	0.3439	1.0041	0.0792	0.5744	0.394	0.8686	0.6692	0.1526	0.3954	0.8354	0.3225	0.7527	0.5781	0.6239	0.5359	0.3179	0.9548	0.7669	0.1939	0.3325	0.6122	0.6901	0.4404	0	0.7299	0	0	0
1.2787	237.133	0	0	0	0	0	0	0	0	0	0	0	0	0	0	0.1851	0	0.1128	0	0	0	0	0	0	0	0.2573	0	0	0	0	0	0	0	0.1146	0	0	0.1851	0	0	0	0	0	0	0	0	0.1744	0	0	0.1599
2.9055	237.126	0	0	0	0	0	0	0	0.0267	0	0	0.1527	0	0	0	0	0	0	0	0	0	0	0.2272	0.2951	0.1826	0.1765	0	0	0.2642	0.1509	0.2844	0	0.1723	0	0	0.2005	0.2073	0	0	0	0	0	0	0	0	0	0	1.0626	0
1.6766	237.119	0	0	0	0	0	0	0	0.3383	0	0.3494	0.2143	0.2486	0	0	0	0	0.2024	0	0	0.2435	0	0	0.3115	0	0.3015	0.2627	0.3764	0.1952	0.5942	0.3964	0	0	0	0	0.4385	0.3204	1.4686	0.5126	0.3988	0	0	0	0	0	0	0	0.5338	0
2.7646	237.112	13.0918	0	1.3813	0	0	0	0	0	0	0	0	0	0	0	0	0.4185	0	0.2091	0	0.2986	0	0.0656	0	0	0	0	0	0	0	0.0652	0	0	0	0	0	0	0	0	0.0554	0	0.6506	0	0	0	0	0	0	0
1.0911	237.109	0	0	0	0	0	0	0	0	0.3714	0	0	0.4332	0	0	0	0	0	0	0	0	0	0	0	0	0	0	0	0	0	0	0	0	0	0.0875	0	0	0	0	0	0	0	0	0	0	0	0	0	0
1.2204	81.0703	0	0	0	0	0	0	0	0	0	0.1402	0	0	0	0	0	0.375	0	0	0	0	0	0	0	0	0	0	0.2909	0	0	0	0	0	0	0.1726	0	0	0	0	0	0.2026	0	0	0.4443	0	0	0	0.6217	0
2.6682	81.0703	0	0	0	0	0	0	0	0.4975	0.504	0.5389	0.5713	0	0.4155	0	0	1.3149	0.8143	0	1.7325	0.2422	0	0.2973	0.1586	0.3175	0.7897	3.1047	0.2601	0.9746	0.3571	1.3999	0.2895	0.7208	0	0.211	0.6512	1.1168	0.0908	0.3759	0	0.4898	0	0	0.4812	0	0	1.331	0	0
0.4775	81.0701	0	0	0	0	0	0	0	0.4649	0.0992	0.3409	0.1137	0	0.5669	0	0.7719	0.6393	0.1407	0	0.6614	0	0.6773	0.5096	0.3223	0.0847	0	0.7291	0	0.3655	0.1364	0.2792	0.0764	0.7233	0.5254	0.4413	0.5894	0	0	0.4558	0.3549	0	0.6145	0.4565	0	0	0.6624	0.7233	0.4532	0.626
0.8507	81.07	0	0	0	0	0	0	0	0	0	0	0	0	0.2114	0	0	0	0	0	0	0	0	0	0.1078	0	0	0	0	0	0	0	0	0	0	0	0	0	0	0	0	0	0	0	0	0	0	0	0	0
1.6057	81.0696	0	0	0	0	0	0	0	0	0	0	0	0.1608	0.8408	0	0.0958	0	0.2079	0.2711	0	0	0	0.4318	0.2067	0	0	0	0	0	0	0	0	0	0	0.389	0	0	0	0	0.5209	0	0	0	0	0	0.6108	0	0	0
2.8435	81.0693	0	0	5.2208	0	0.9732	0	0	0	0	0	0	0	0	0	0	0	0.0105	0	0	0	0	0	0	0	0.1021	0	0	0	0	0	0	0.0361	0	0.3917	0.2418	0	0.1103	0	0	0	0	0	0	0	0	0	0.0305	0
2.0943	81.0582	0	0	0	0	0	0	0	0.3354	0.6738	0.257	0.4223	0	0	0.0466	0.2746	0	0	0.1854	0	0	0.1879	0.1432	0.2333	0	0	0.1767	0.402	0.4555	0.1474	0.4335	0.9606	0	0.1136	0.3336	0.1479	0	0.4338	0	0.0274	0	0.3693	0	0.6721	0.6804	0	0	0	0
1.0133	81.0436	0	0	0	0	0	0	0	0.1381	0.1403	0	0	0	0	0.2598	0.1813	0.1696	0.1521	0.2574	0	0.1656	0.4605	0.2048	0.2346	0.1131	0.2013	0.257	0.1009	0.1204	0.2012	0.2012	0.1732	0.1758	0.161	0.266	0.1828	0.1787	0.1623	0.1898	0.1545	0.0863	0.2363	0	0	0	0.2401	0	0	0
3.4912	81.043	0	0	2.4275	0.01	0	0	2.2156	0	0.0707	0	0	0	0	0.0548	0.0203	0.0599	0	0	0.0345	0	0.0085	0	0.1116	0.1724	0.0072	0	0.0731	0	0	0	0	0	0	0	0.0021	0	0	0	0.2163	0	0	0	0	0	0	0	0	0
2.0743	80.7491	0	0	0	0	0	0	0	0.0991	0	0	0	0	0	0	0	0	0.0835	0	0.1197	0	0	0	0	0	0	0	0	0	0	0	0	0	0	0.1466	0	0	0	0	0	0	0	0	0	0	0	0	0	0
2.0689	80.6718	0	0	0	0	0	0	0	0	0	0	0	0	0	0.1472	0.1185	0	0.1376	0.1277	0.1677	0.0906	0.1414	0	0	0	0.1676	0	0	0	0	0	0	0	0	0	0	0	0	0	0	0	0.1984	0	0	0	0	0	0	0.2266
2.0706	80.3154	0	0	0	0	0	0	0	0	0	0	0	0	0	0	0	0	0	0	0.1449	0	0	0	0	0	0	0	0	0	0	0	0	0	0	0.1412	0	0	0	0	0	0	0	0	0	0.2326	0	0	0	0
2.0799	80.2679	0	0	0	0	0	0	0	0	0	0	0	0	0	0	0	0.1015	0.1307	0	0	0.0881	0	0	0	0	0.1525	0	0	0	0	0	0	0	0	0.1411	0	0	0.2183	0.1454	0.1029	0	0.1885	0	0	0	0	0	0	0
0.7652	80.0499	0	0	0	0	0	0	0	0	0	0	0	0	0	0	0.1721	0.1416	0	0	0	0.3844	0	0.2465	0.218	0.2718	0.148	0.2797	0	0.2128	0.184	0.2691	0.2001	0.2029	0.1861	0.2501	0.2873	0.5947	0	0.1644	0.2186	0	0.1819	0	0	0	0	0	0	0
0.5303	80.0499	0	0	0	0	0	0	0	0.3492	0.3542	0.3024	0.3615	0.3265	0.4371	0.2951	0.5382	0.5682	0.5137	0.24	0	1.0367	0.3473	0	0	0.709	0.2081	0	0.255	0.6231	0.422	0.3426	0.3645	0.3482	0.409	0	0.7264	1.1973	0	0.3091	0	0.4204	0.2548	0.3906	0.3797	0	0.2186	0	0.498	0.2038
2.7432	80.0498	0	0	0	0	0	0	0	0	0	0.2444	0	0.1858	0.2505	0.4549	0.7247	0	0	0.0162	0	0	0	0	0.3956	0.8042	0	0.21	0	0.2873	0.0392	0.499	0	0	0.4671	0.6138	0.7868	0.4291	0	0.5053	0	0.0148	0.6373	0.148	0	0	0	0	0	0
2.0747	802.067	0	0	0	0	0	0	0	0	0	0	0	0	0	0	0	0	0.1105	0	0.1686	0.0507	0	0	0	0	0.1091	0	0	0	0	0	0	0	0	0.1009	0.0558	0	0.2139	0.0669	0	0	0.1178	0	0	0	0	0	0	0
0.5019	801.642	0	0	0	0	0	0	0	0	0	0	0	0	0	0	0	0	0	0	0	0	0	0	0	0	0	0	0	0.1096	0.1408	0	0	0	0	0	0	0.1349	0	0	0	0.1892	0	0	0	0	0	0	0	0
0.4351	801.551	0	0	0	0	0	0	0	0	0.2054	0.2113	0	0	0	0	0	0	0	0	0.0794	0	0	0.1138	0.0907	0.102	0.1148	0.1977	0.1118	0.0582	0.0812	0.0852	0.1092	0.0721	0.1183	0	0.0605	0.048	0.1803	0	0	0.0509	0	0.1132	0.1622	0.2143	0	0	0.1337	0
1.2508	801.493	0	0	0	0	0	0	0	0	0.1453	0.1858	0.3374	0	0.262	0	0	0	0.0601	0	0	0	0	0.1203	0.1165	0.1242	0.1615	0.1209	0.1309	0	0.0567	0	0	0	0.0616	0.1188	0.1144	0.0922	0.1363	0.1217	0.3196	0.3597	0.2348	0.3795	0.3012	0.319	0.3609	0.1983	0.1935	0.2057
2.0732	801.403	0	0	0	0	0	0	0	0	0	0	0	0	0	0	0	0	0	0.0808	0	0	0	0	0	0	0	0	0	0	0	0	0	0	0.1009	0.1283	0.0869	0	0	0.1023	0	0	0	0	0	0	0	0	0	0
3.0895	800.607	0	0	0	0	0	0	0.959	0.7245	0.7294	0.5908	0.4402	0.4906	0.656	0.4874	0.7767	0.3536	0.4969	0.6297	0.9235	0.5285	0.7395	0.6291	0.6061	0.4984	0.7715	0.8846	0.3047	0.5624	0.6707	0.2603	0.3926	0.7653	0.6512	0.6977	0.8798	0.6511	0.3536	0.8325	0.4774	0.2905	1.0899	0.8816	0.4259	0.8893	0.3279	0	0.6001	0.8753
1.7781	800.535	0	0	0	0	0	0	0	0	0.1542	0	0.357	0.2902	0.1931	0	0	0	0	0	0	0	0	0.0847	0	0	0.1107	0.1008	0.1425	0	0	0.1042	0	0	0.1915	0	0.1017	0.0816	0.4307	0.3111	0.1858	0	0	0.1728	0.184	0	0.2082	0.3024	0	0
0.4673	798.663	0	0	0	0	0	0	0	0	0	0	0	0	0	0	0	0	0	0	0	0	0	0	0	0	0	0	0	0	0	0	0	0	0	0	0	0	0	0	0	0	0	0	0	0	0	0	0	0
0.7511	797.997	0	0	0	0	0	0	0	0	0	0	0	0	0	0	0	0	0	0	0	0	0.1052	0	0	0	0	0	0	0	0	0	0	0	0	0.2952	0	0	0	0	0	0	0	0	0	0	0	0	0	0
0.7661	797.496	0	0	0	0	0	0	0	0.1314	0	0	0	0	0	0	0	0	0	0.8222	0.224	0	0.9218	0	0	0.0766	0	0	0	0	0	0.3048	0	0	0.1817	0.3336	0	0	0	0	0	0	0	0	0	0	0	0	0	0
0.4366	796.149	0	0	0	0	0	0	0	0	0	0	0	0	0	0	0	0.0686	0	0	0	0	0.1331	0	0	0	0	0	0	0	0	0	0	0	0	0	0	0.0418	0	0.4003	0.5606	0.065	0	0	0.3219	0	0	0	0	0
0.4305	794.72	0	0	0	0	0	0	0	0.1882	0	0	0	0	0	0	0	0	0	0	0	0	0	0	0	0	0	0	0	0	0	0	0	0	0	0	0	0	0	0	0	0	0.295	0	0	0	0	0	0	0
3.0885	794.614	0	1.4188	0	0.852	0	0	0	16.767	16.9356	16.7367	18.2751	17.9889	18.6113	14.3392	17.727	24.214	12.643	18.0137	24.5619	19.2913	22.0862	17.5407	15.7332	11.7161	18.0509	24.0398	7.821	11.5054	19.6084	19.8538	12.6318	20.6236	18.8941	20.6974	23.5158	17.9295	12.7968	20.3894	13.3091	7.9678	28.9337	26.8102	10.8927	24.1848	19.9576	8.0052	19.0441	21.1547
2.0607	794.565	0	0	0	0	0	0	0	0	0	0	0	0	0	0	0	0.1974	0	0.0646	0.173	0	0.2041	0	0.0976	0	0.2985	0	0.1448	0	0	0	0	0.0613	0	0.1513	0	0	0	0.1282	0	0	0	0	0	0.4549	0	0	0	0
2.5623	794.549	0	0	0	0	0	0	0	0	0	0	0	0	0	0	0	0	0	0	0	0	0	0	0	0	0	0.1538	0	0	0	0	0	0	0	0	0.0804	0	0	0	0	0	0	0	0	0	0	0	0	0
0.5192	794.513	0	0	0	0	0	0	0	0	0	0	0	0	0	0	0	0	0	0	0	0	0	0	0	0	0	0	0	0	0	0	0	0.0775	0	0	0	0	0	0.3919	0	0	0	0	0	0	0	0	0	0
2.7033	386.251	0	0	0	0.0166	0.5793	2.0661	0	0	0	0	0.628	0.9316	0	0	1.9756	1.9343	1.1413	1.2874	2.9142	1.1388	0	1.5136	0.7943	0.6839	0.9164	0	0.9398	0.7597	1.627	1.4064	0.7565	3.1237	1.7564	0.6154	1.4084	1.5254	1.3497	1.8788	1.3156	0.5895	0.6342	0	0	0	1.2298	0.7668	0	0
1.4363	386.238	0	0	0	0	0	0	0	0	0	0	0	0	0	0	0	0	0	0	0	0	0	0	0	0	0	0.1998	0	0.0754	0	0	0	0	0	0	0	0	0	0	0	0	0	0	0	0	0	0	0	0
0.7241	386.237	0	0	0	0	0	0	0	0.2569	0.2774	0.194	0.2729	0.2257	0.2064	0	0.2243	0.1688	0.4458	0.1595	0	0.1515	0	0.5224	0.1548	0.1933	0	0.4053	0.1241	1.2704	0.2401	0.4768	0.2916	0.2686	0.1941	0	0.2265	0.1612	0.4973	0.3036	0.2634	0	0	0	0	0.522	0.2701	0	0	0
1.1904	386.235	0	0	0	0	0	0	0	0	0	0.2305	0.1762	0	0	0	0	0	0	0	0	0	0	0	0	0	0	0.4351	0	0	0	0	0	0	0	0	0	0	0	0	0	0	0.5951	0.2782	0.3845	0	0.1908	0.6401	0.5951	1.1178
2.5435	386.127	0	0	0	0	0	0	0	0.2472	0	0	0	0	0	0	0.0279	0	0	0.2196	0	0	0.6584	0	0	0	0.3869	0	0	0	0	0.1424	0	0	0	0	0	0	0	0	0	0	0	0	0	0	0	0	0	0
0.687	386.126	0	0	0	0	0	0	0	0.3916	0.0627	0	0	0	0	0.2452	0	0.3654	0.0809	0	0	0.2495	0.5435	0.2335	0	0	0.0693	0	0	0	0	0	0	0	0	0	0.0932	0	0	0	0	0	0.0808	0	0.3631	0	0	0	0	0.192
1.8809	386.126	0	0	0	0	0	0	0	0.1379	0.2377	0	0	0	0	0.2754	0.1933	0.1459	0	0	0	0	0	0.1708	0.2221	0	0.2288	0	0	0	0	0	0	0	0	0	0	0	0	0	0	0	0	0	0.3415	0.399	0	0.2815	0	0
2.8067	386.125	0	0	0	0	3.4665	9.3881	0	0.4736	0.4493	0.5492	0	0	0	0.071	0	0.7061	0	0	0	0.6043	0.1521	1.0538	0.1147	0	0.0783	0.113	0	0	0.2294	0.1458	0.2114	0	0.3371	0.5114	0.5456	0	0	0	0	0.1333	0	0	0.0442	0	0.0122	0	0	0
0.9778	386.125	0	0	0	0	0	0	0	1.1515	0.0996	0.1114	0.1807	0.4053	0	1.8193	1.0102	1.7931	0.7938	0.3195	1.794	0.2412	1.9853	0.4779	0.1143	0.265	0.2482	0.3101	0.3516	0.4636	0.4913	1.1572	0.7873	1.0981	0.4083	1.2154	0.4311	0.7429	0	0.4065	0	0	1.7571	0	0	0	0	0	0	0
1.2281	386.125	0	0	0	0	0	0	0	0.4376	0.8206	0	0	0	0	0	0.2131	0	0.1893	0	0	0.1556	0	0	0.7784	0	0.4156	0	0	0.0428	0.0832	0.0578	0	0.1121	0	0	0.2217	0	0	0.2648	0.0833	0	0	0	0.8286	0	0	0.353	0	0
2.1405	386.125	0	0	0	0	0	0	0	0	0.0941	0	0	0	0	0.301	0.3437	0.045	0	0.35	0.3269	0.4139	0.2617	0	0.3797	0.2659	0.2868	0.5375	0.165	0.1972	0.1211	0.3839	0	0	0.2413	0.2764	0	0	0	0.3281	0.0407	0	0	0	0	0	0	0	0	0
1.6224	386.124	0	0	0	0	0	0	0	0.5593	0.2544	0.6671	0	0	0	1.1262	0.2602	0.7376	0.1431	0.2063	0.0713	0.6727	0.6701	0.0803	0.7152	0	0.4262	0.1311	0	0	0	0.2886	0	0	0	0.4678	0	0	0.2633	0	0	0	0	0.6073	0	0.1842	0	0	1.0654	0.6555
0.5771	386.088	0	0	0	0	0	0	0	0	0	0	0	0	0	0	0	0	0	0	0	0	0	0	0.1232	0	0	0	0	0	0.1231	0	0	0	0	0.1455	0	0	0	0	0	0	0	0	0	0	0	0	0	0
1.128	386.055	0	0	0	0	0	0	0	0	0	0	0	0	0	0	0.0979	0	0	0	0	0	0	0	0	0	0	0	0	0	0	0	0	0	0	0	0	0	0	0	0.0807	0	0	0	0	0	0	0.2292	0	0
0.4603	385.293	0	0	0	0	0	0	0	0.2154	0.3224	0.2153	0.1556	0	0	0.2005	0	0.1326	0.0778	0.1508	0.313	0	0	0	0.1283	0.0664	0	0	0.0976	0	0.08	0	0.0662	0	0.0753	0	0	0	0	0.1088	0	0	0.3306	0	0	0	0.1942	0	0.2572	0
0.5825	385.218	0	0	0	29.7958	0	0	0	0	0	0	0	0	0	0	0	0	0	0	0	0	0	0	0	0	0.2133	0	0	0	0	0	0	0	0	0	0	0	0	0	0	0	0	0	0.2539	0.206	0.2693	0	0	0
0.5923	239.142	39.169	0	0	0	0	43.8184	0	2.3746	2.5165	2.7783	2.4708	2.5296	2.782	1.1442	1.2099	1.2689	1.756	10.4178	2.7275	1.2705	3.9421	4.7486	3.3881	5.5845	3.2802	2.0708	3.7762	1.2071	8.4711	2.5797	1.1811	1.3939	2.3746	3.4414	1.5797	2.5633	2.3709	1.6563	3.909	2.0938	0.8047	1.2881	1.6873	2.2791	7.7452	1.9144	1.3665	1.3805
1.1572	239.135	0	0	0	0	0	0	0	0.8555	0.5015	0.251	0.9721	0.4985	0.2511	0.4353	0.3134	0.1198	0.2995	0.5667	0	0	0.344	0.4131	1.2572	0.7037	0.211	0.5842	0.9211	0.1146	0.3457	0.5188	0.3967	0	0	0.4034	1.2779	0.1173	2.4743	0.7416	0.7842	0.2923	0.1956	0.5625	0	0	0	0	0	0
2.529	239.128	0	0	0	0	0	0	0	0	0	0	0	0	0	0	0	0	0	0	0	0	0	0	0	0	0	0	0	0	0.2386	0	0	0	0	0	0	0	0.3922	0	0	0	0	0	0	0	0	0	0	0
3.3443	239.119	0.6503	9.5179	9.4797	0	0	0	0	0	0	0	0	0.0051	0	0	0	0	0.1797	0	0	0	0	0	0.0732	0	0	0	2.4712	0.0633	0	0	0.2037	0	0.0497	0	0	0	0	0	0.4962	0.0878	0	0	0	0	0	0	0	0
2.7265	239.113	0	0	0.0305	0	2.1796	2.0353	0	0	0	0	0.0039	0	0	1.2199	0.0421	0.7961	0.0032	0.0327	0.2117	0	0	0.0751	0.5006	0	0.7754	0	0	0.2578	0.0662	0	0	0	0	0.1902	0.0053	0.2436	0	0	0	1.2806	0	0	0	0	0	0	0	0
1.9844	239.108	0	0	0	0	0	0	0	5.7029	5.9196	5.5029	5.9301	5.352	5.8372	0	0.6419	0.5461	0.6874	0.3447	1.027	0.6098	7.1546	0.4828	0.8185	52.9201	0.4475	0	5.7171	0.5778	68.8831	0.1805	0.2159	0.5712	0.4588	0.6805	0.6935	19.8299	0.4258	6.4328	0.7094	31.8792	0	0	0	0	0	0.6919	0	0
1.7544	239.107	0	0	0	0	0	0	0	10.0193	9.9197	9.2646	10.2014	9.2649	9.1322	0.1186	0.2338	0	0.1641	0.0768	0	0.2292	31.4434	0.162	0.1605	91.8169	0	0.3337	18.5256	0.1701	98.8532	0	0.1681	0	0	0.1516	0	67.7317	0	16.0535	0.1875	57.8722	0.2966	0	0	0	0	0	0	1.3896
1.1101	239.093	0	0	0	0	0	0	0	0	0.4561	0.2851	0.2813	0	0.4892	0.8741	0.5565	0.3816	0.2951	0.3367	1.2135	0.1187	0	1.1009	0.5247	0.6718	0.4047	0.2918	0	0.438	0.0864	0.3509	0	0.8107	0.6238	0.3305	0.1589	0.5252	0.2546	0	1.1257	0.1902	0	0	0.4331	0.7058	0	0	0.4402	0.0738
0.9378	239.089	0	0	0	0	0	0	0	1.9999	1.9481	2.0099	1.535	1.6667	1.7378	1.9796	0.8423	2.2158	2.9218	1.6842	5.6473	1.7182	2.1628	3.4114	3.1211	2.4491	2.1502	2.1681	3.1163	1.585	2.0964	1.8947	1.8194	3.1136	1.9747	1.9466	0.6522	2.1128	2.9509	2.7607	4.2454	1.9667	0.6706	0.6428	0	0	1.8094	0.9703	0	0
0.7632	239.085	0	0	0	0	0	0	0	0	0.3461	0.11	0	0	0	0	0.1064	0	0	0	0	0.2529	0	0.1713	0	0	0	0	0.3495	0.1483	0	0	0	0	0	0	0.2761	0.0917	0	0	0.2892	0	0	0	0	0.3601	0	0	0	0
3.0262	238.972	0	0	0	0.6045	0	0	0	0.0479	0.0468	0	0	0	0	0.0178	0	0.0559	0	0	0	0.1134	0	0	0	0.0971	0	0	0.0354	0.0729	0.0214	0.042	0.0724	0.1059	0.153	0	0.0696	0.1153	0.0911	0.0931	0.162	0	0.079	0	0	0	0	0	0	0
0.4706	238.179	0	0	0	0	0	0	0	0	0	0	0	0	0	0	0	0.2832	0.1672	0	0	0	0	0	0	0	0	0	0	0	0	0	0	0	0	0	0	0	0	0	0	0	0	0	0	0	0	0	0	0
2.1021	238.13	0	0	0	0	0	0	0	0.1798	0	0.3056	0.294	0	0.3002	0.3929	0.2893	0	0.1822	0.1292	0.3053	0.091	0	0.4984	0.1688	0.301	0.324	0.288	0.1335	0.2336	0.3424	0.3011	0.0215	0	0.1859	0.2019	0.1875	0.0743	0.3573	0.2078	0.0919	0.1469	0.2711	0	0	0	0.265	0	0	0
0.5445	238.127	0	0	0	0	0	0	0	0	0	0	0	0	0	0	0	0	0	0	0	0	0	0	0	0	0	0	0.1023	0	0.235	0	0	0	0	0.4474	0	0.1418	0	0	0	0.1193	0	0	0	0	0	0	0	0
0.7671	238.114	0	0	0	0	0	0	0	0	0.6383	0.5635	0.2173	0.3763	0.4451	0.9566	0.7892	0.8732	0.3365	0.3178	1.0116	0.8509	0.765	0.8624	0.3251	0.7986	0.8498	0.0318	0.3329	0.7244	0.5927	1.114	0.3297	0.4001	0.9809	1.3748	0.0845	0.1919	0.5557	0.2706	0	0.3894	0.3143	0.8011	0.4657	0	0	0.2656	0	1.1129
2.7844	238.108	0	0	0	10.9944	0	0	4.9171	0.2033	0	0	0	0	0	0.2267	0	0.2889	0	0.2627	0.4209	0.1693	0.1416	0.4482	0	0.3023	0.3425	0	0.0961	0.2205	0	0.0632	0	0.559	0	0	0.3573	0.0196	0	0.2527	0	0	0	0.6092	0	0	0	0	0.0001	0
0.4502	83.0856	0	0	0	0	0	0	0	0.2745	0	0.2711	0	0	0	0	0	0.5133	0	0.4051	0.8322	0.1757	0.1835	0.367	0	0	0.3805	0.8314	0	0	0.1375	0	0.3384	0	0	0.307	0.3876	0.2909	0.3642	0.415	0	0.2462	0.201	0.9532	0	0	0	0.8746	0.9954	0.8054
1.2142	83.0852	0	0	0	0	0	0	0	0	0.4317	0	0	0	0	0	0	0	0	0	0	0	0	0	0	0.3542	0	0	0	0	0	0.4242	0	0	0	0	0	0	0.5066	0.3067	0.3474	0.256	0	0	0.3304	0	0	0	0	0
0.6695	83.0852	0	0	0	0	0	0	0	0	0	0.5782	0	0.4527	0	0	0	0	0	0.183	0.4376	0.3412	0.3347	0	0.7107	0.4141	0	0	0	0	0	0	0	0	0	0	0	0	0	0.3327	0	0.4453	0.562	0	0	0.5428	0.3543	0	0.768	0.4179
1.6171	83.0813	0	0	0	0	0	0	0	0	0	0	0	0	0	0	0	0	0.1403	0	0	0	0	0.3243	0.3158	0.436	0	0	0	0.3854	0	0	0	0	0	0	0	0	0	0	0.5106	0	0	0	0	0.7047	0	0	0	0
2.0398	83.062	0	0	0	0	0	0	0	0.3933	0.3372	0.4068	0.581	0.3087	0.1748	0.5743	0.6872	0.3725	0.4618	0.2781	0.8873	0.3087	0	0.6955	0.432	0.195	0.2492	0	0.3985	0.6132	0.4193	0.0993	0	0.787	0.3226	0.4655	0.3549	0.5519	0.4423	0.5869	0.7451	0.2203	0.3252	0.4649	0.4798	0	0.2968	0	0.1672	0
2.2742	83.0606	0	0	0	0	0	0	0	2.3254	2.1572	2.0031	2.2968	2.0698	2.1742	2.6364	4.4535	1.2261	2.6631	1.5606	2.2986	4.1613	2.1398	2.4319	3.1999	1.5681	2.447	3.1722	2.4244	2.5248	1.4185	3.5682	1.525	3.2207	1.9983	3.9612	0.6632	2.0058	2.3346	1.3938	2.4319	1.8839	3.4178	2.6834	1.7706	2.4186	2.0107	1.3188	3.0718	2.9932
2.757	83.0497	0	0	0	0	0	0	0	0.3286	0.3097	0.2652	0	0.3774	0.321	0.5933	0.3816	0.5414	0.3113	0.3748	0.5644	0.3476	0.3224	0.7398	0.4598	0.3697	0.4965	0	0.1392	0.3452	0.386	0.4873	0.3819	0.2566	0.384	0.6003	0.3239	0.372	0	0.5412	0.4282	0.291	0.4476	0	0	0	0.4378	0	0	0
1.8738	82.0654	0	0	0	0	0	0	0	0	0	0	0	0	0	0	0	0	0	0	0.3187	0	0	0.1896	0	0	0	0	0	0	0	0	0	0	0	0	0	0.2347	0	0	0	0	0	0.2799	0	0	0	0	0	0
0.5581	82.0653	0	0	0	0	0	0	0	0.2409	0.2107	0.2281	0.2409	0.191	0.1947	0.2051	0.3385	0.3932	0.2295	0.1656	0	0.2783	0.2356	0	0	0.0727	0.1757	0	0.1801	0.3755	0.2409	0.3385	0.268	0.2963	0.1979	0	0.295	0.3425	0.1883	0.2854	0.3732	0.2527	0.3099	0.3444	0.3963	0	0.2288	0	0.2477	0
1.2643	82.0404	0	0	0	0	0	0	0	0	0	0	0	0	0	0	0.0982	0.1228	0	0	0.1396	0	0	0	0	0	0	0	0	0.0687	0	0	0	0.0787	0	0	0	0	0	0	0	0	0	0	0	0	0	0	0	0
2.4656	82.0289	0	0	0	0	0	0	0	0.1592	0	0	0	0.1798	0.1687	0.2822	0	0.1877	0	0.1746	0.2759	0.2172	0.169	0	0.1475	0.1561	0.2764	0.2203	0.1916	0.2164	0.193	0	0.1838	0.2027	0.2273	0.2106	0.2061	0	0.273	0	0.2334	0	0.2106	0	0	0	0	0.2018	0	0
3.119	81.6638	0	0	0	0	0	0	0.2668	0	0	0	0	0	0	0	0	0	0	0	0	0	0	0	0	0	0	0	0	0	0	0	0	0	0	0	0.0824	0.0599	0	0	0	0	0	0	0	0	0	0	0	0
3.1155	81.575	0	0	0	0	0	0	0	0	0	0	0	0	0	0	0	0	0	0	0	0	0	0	0	0	0	0	0	0	0.081	0	0	0.0646	0	0	0.0722	0.0608	0	0	0	0	0	0	0	0	0	0	0	0
2.093	81.4548	0	0	0	0	0	0	0	0	0	0	0	0	0	0	0	0	0	0	0	0	0.0934	0	0	0	0	0	0	0	0	0	0	0	0	0	0	0	0	0	0	0	0.1591	0	0	0	0	0	0	0
2.0866	81.1139	0	0	0	0	0	0	0	0	0	0	0	0	0	0	0	0	0.0914	0	0	0	0	0	0	0	0	0	0	0	0	0	0	0	0.0993	0.0922	0	0	0	0	0	0	0	0	0	0	0	0	0	0
0.6734	81.0704	0	0	0	0	0	0	0	0	0	0.5034	0	0.4195	0.5371	0.5299	0.3095	0	0.4886	0.2949	0.4797	0	0.5132	0.4534	0.5149	0.6725	0.5439	0	0	0.3073	0.2684	0.2947	0.5055	0.3607	0.2249	0.3947	0.3715	0.4292	0	0.3914	0.58	0.4958	0.5782	0	0	0	0.5719	0	0.7092	0.5474
0.4796	810.158	0	0	0	0	0	0	0	0	0	0.0618	0	0.0749	0.0819	0	0.1025	0.0879	0.1539	0.0474	0	0.2355	0.3251	0	0	0.0408	0.0682	0	0	0.6177	0.4727	0.122	0.1497	0.1853	0.2352	0	0.039	0.5825	0	0.2597	0.253	0.5618	0	0.1285	0.0875	0	0	0	0	0.239
0.4306	809.705	0	0	0	0	0	0	0	0	0	0	0	0	0	0	0.0599	0	0	0	0	0	0	0	0	0	0	0	0	0.0441	0	0	0	0	0	0	0	0	0	0	0	0	0	0	0	0	0	0	0	0
0.5109	808.523	0	0	0	0	0	0	0	0	0	0	0	0	0	0	0	0	0	0	0	0	0	0	0	0	0	0	0	0	0	0	0	0.0994	0	0	0	0	0	0.286	0	0	0	0	0	0	0	0	0	0
0.5083	808.134	0	0	0	0	0	0	0	0	0	0	0	0	0	0	0	0	0.0555	0	0	0	0	0	0	0	0	0	0	0.1258	0.0767	0	0.0348	0	0	0	0	0.0673	0	0	0	0.101	0	0	0	0	0	0	0	0
0.5654	807.186	0	0	0	0	0	0	0	0	0	0.1291	0	0	0	0	0.1576	0.0739	0.1733	0.1829	0	0.1347	0.204	0	0	0	0.0475	0	0.0492	1.1958	0.242	0.338	0.7056	0.2138	0.4338	0	0.1663	0.6039	0	0.0593	0	0.5013	0	0.0999	0.1132	0	0	0	0	0
0.4682	806.578	0	0	0	0	0	0	0	0	0	0	0	0	0	0	0.1009	0	0	0	0	0.1083	0	0	0	0	0	0	0.0921	0	0	0	0	0.1511	0	0	0.0605	0	0	0.3108	0	0	0	0.1406	0	0	0	0	0	0
2.6791	806.545	0	0	0	0	1.616	0	0	0	0	0.0878	0	0.2948	0.5378	0	0	0.2891	0.1861	0	0.2993	0	0.0278	0	0	0	0.239	0.15	0.0969	0.0295	0.0604	0.3783	0.0773	0.071	0.0795	0	0.0677	0.3862	0	0.1603	0.4166	0.4717	0.1371	0	0.4101	0.4229	0.3343	1.2513	0.0703	0.0901
1.3989	806.238	0	0	0	0	0	0	0	0.319	0	0	0	0	0	0.2561	0	0	0.166	0	0.3388	0	0	0.1669	0	0	0	0	0	0	0	0	0	0	0.1471	0	0	0	0	0	0.1208	0	0	0.2655	0.1332	0.3341	0.2732	0.3382	0.1428	0.4521
0.4994	806.133	0	0	0	0	0	0	0	0	0	0	0	0	0	0	0	0	0.0737	0	0	0.0543	0	0	0	0	0	0	0	0.0656	0	0	0	0	0	0	0	0	0	0	0	0	0	0	0	0	0	0	0	0
0.5644	805.167	0	0	0	0	0	0	0	0	0	0	0	0	0	0	0.0707	0	0	0.0515	0	0	0.0493	0	0	0	0	0	0	0.1683	0.0406	0.0837	0.156	0.0551	0.1125	0	0.0446	0.1424	0	0	0	0.0655	0	0	0	0	0	0	0	0
0.4581	804.6	0	0	0	0	0	0	0	0	0	0	0	0	0	0	0	0	0	0	0	0	0	0	0	0	0	0	0	0	0	0	0	0.339	0	0	0	0	0	0.3046	0	0	0	0	0	0	0	0	0	0
1.6121	804.289	0	0	0	0	0	0	0	0	0	0	0	0	0	0	0	0	0	0	0	0	0	0	0.1076	0	0	0	0	0.068	0	0	0.0686	0	0	0	0	0	0	0	0.1361	0	0	0	0	0	0	0	0	0
3.0559	803.675	0	0	0	0	0	0	4.4633	0.0815	0	0	0	0	0	0	0	0	0.226	0	0.101	0	0	0.0137	0.2392	0	0	0.0463	0	0.0936	0	0	0	0.0646	0.1027	0.0527	0	0	0.5975	0	0.0419	0.0561	0	0	0.0245	0	0	0	0	0
2.083	803.398	0	0	0	0	0	0	0	0	0	0	0	0	0	0	0	0	0	0.077	0	0.0868	0	0	0	0	0	0	0	0	0	0	0	0	0	0.1393	0	0	0	0	0	0	0.1567	0	0	0	0	0	0	0
0.4858	803.154	0	0	0	0	0	0	0	0	0	0	0	0	0	0	0	0.0744	0	0	0	0	0	0	0	0	0	0	0.0477	0	0	0	0	0	0	0	0	0	0	0	0.0692	0	0	0	0	0	0	0	0	0
2.077	802.733	0	0	0	0	0	0	0	0	0	0	0	0	0	0	0	0.11	0.0753	0	0.062	0	0.1291	0	0	0	0	0	0	0	0	0	0	0	0	0.1329	0.0973	0	0	0	0	0	0	0	0	0	0	0	0	0
2.6058	388.137	0	0	0	0	0	0	0	0	0	0	0	0	0	0	0	0	0	0	0	0.1593	0	0	0	0	0	0	0	0	0	0	0	0	0	0	0	0	0.2901	0	0	0	0	0	0	0	0	0	0	0
0.6654	387.206	0	0	0	0	0	0	32.6222	0	0	0	0	0	0	0	0	0	0	0.1579	0	0	0	0	0	0	0	0	0.143	0	0	0	0	0	0	0	0	0	0	0	0	0.0927	0	0	0	0	0	0	0	0
1.6507	387.201	0	0	0	0	0	0	32.0246	0	0	0.2333	0	0	0	0	0	0	0	0	0	0	0	0	0	0	0	0	0	0	0	0	0	0	0	0	0	0.5579	0	0	0	0	0	0	0.3306	0	0	0	1.0508	0.5995
1.8885	387.2	0	0	0	0	0	0	0	0	0	0	0.1271	0	0	0	0	0	0	0	0	0	0	0	0	0	0	0	0	0	0	0	0	0	0	0	0	0	0	0	0	0	0	0.4496	0.2206	0	0	0	0	0
2.8599	387.2	0	0	0	0	0	1.7681	0	0.3866	0	0	0	0.0355	0.4134	0	0.268	0.0155	0	0.4143	0	0.2855	0.1006	0	0	0	0.0846	0	0.0178	0	0	0	0	0	0	0	0	0.2123	0	0.1078	0	0	0	0.0747	0.1305	0	0.0839	0	0	0.5756
1.012	387.2	0	0	0	0	0	0	0	0	0	0.9747	0.7379	1.2502	0.9494	0	0.4218	0.4858	0.1751	0.0908	1.2284	1.012	0.2648	0.9953	0.6193	0.1239	0.1293	1.1442	0.7694	0.9264	0.4461	1.7737	0.4174	1.2569	0.5978	0	0.9575	0.4666	0.3542	1.0319	0.2384	0.231	0	0.0867	0.4382	0.9088	0	0	1.0362	1.7854
0.3045	387.2	0	0	0	35.976	0	36.6202	0	0	0	0	0.2358	0	0	0	0.0649	0	0	0	0	0.2038	0	0	0	0	0	0	0	0	0	0	0	0	0	0	0	0	0	0	0	0	0	0	0	0	0	0	0	0.1576
2.2006	387.2	0	0	0	19.5179	38.5298	0	0	0	0	0	0	0	0	0	0	0	0	0	0	0	0	0	0	0	0	0	0	0	0	0	0	0.0731	0	0	0	0	0	0	0	0	0	0	0	0	0	0	0	0
1.2344	387.199	0	0	0	0	0	0	0	0	0	0	0.0357	0	0	0	0	0.1271	0	0	0.195	0.0183	0	0	0	0	0.1594	1.2376	0	0.0677	0	0.2036	0.1798	0	0	0.0887	0.2146	0	0.0961	0	0	0.2312	0	0.2383	0	0	0	0.1676	0	0
2.6232	387.167	0	0	0.013	0	2.5886	0	0	0	0	0	0	0	0	0.0043	0	0	0	0	0	0	0.4666	0	3.0479	1.0816	0.9668	0.3027	0	1.3667	0	0	1.2309	0.0048	0	0.0017	0.2998	0.0903	0	0	1.7516	0.7261	0	0	0	0	0	0.0009	0	0.1696
0.5771	387.137	0	0	0	0	0	0	0	0	0	0	0	0	0	0	0	0	0	0	0	0	0	0	0	0	0	0	0	0	0	0	0	0	0	0	0	0	0	0	0	0	0	0	0	0	0	0	0	0
1.1758	387.121	0	0	0	0	0	0	0	0	0	0	0	0	0	0	0	0	0	0	0	0	0	0	0	0	0	0	0	0	0	0.6445	0.4821	0	0	0	0	0	0	0	0	0	0	0	0	0	0	0	0	0
3.1103	387.081	0	0	0	0	0	0	0	0	0	0	0	0	0.3151	0	0	0.4682	0.3404	0.236	1.1324	0	0.0015	0	0	0.6257	0.3904	0	0	0.312	0.0933	0	0.2626	0	0	0.4026	0.1387	0.3966	0	0	0	0.1897	0	0	0	0.0239	0	0.0638	0	0.7038
3.0627	386.762	0.2069	0	0	0	0	0	0	0.7537	0	0	0	0	0	0.1618	0	0.372	0	0.1115	0	0.0536	0	0.0958	0	0	0	0	0.1944	0	0	0.2217	0	0	0	0	0	0	0	0	0	0	0	0	0.1194	0	0	0.0865	0	0
1.5867	386.291	0	0	0	0	0	0	0	0	0	0	0	0	0	0	0	0	0	0	0	0	0	0	0.3279	0	0	0	0.1387	0	0	0	0	0	0	0	0	0	0	0	0	0	0	0	0	0	0	0	0	0
1.7059	386.288	0	0	0	0	0	0	0	0	0	0	0	0	0.4235	0	0.9951	0.371	0.4851	0.3567	1.8415	0.1619	0	1.0408	0	0	0.3488	0	0.6516	0.4394	0.3531	0.3575	0.1915	0.7696	0.8028	0.3544	0.094	0.3909	0	0.4354	1.0479	0.1716	0	0	0	0	0	0	0	0
1.2409	240.229	0	0	0	0	0	0	0	0.4424	0	0	0	0.9451	0	0	0	0	0	0.0519	0	0	0	0	0.4133	0	0.1692	0	0	0	0	0	0	0	0.2157	0	0.0608	0.0964	0.5374	0.0377	0.2252	0.3867	0.8746	0	0.1398	0	0	0	0	0
1.2459	240.196	0	0	0	0	0	0	0	0	0	0	0	0	0	0	0	0	0.5811	0	0	0	0	0	0	0	0	0	0	0	0	0	0	0	0.2475	0	0	0	0	0	0	0.2695	0	0	0	0	0	0	0	0
3.3405	240.125	0	0	0	0	0	0	0	0	0	0	0	0	0	0	0.197	0.0635	0.1777	0	0	0	0	0	0	0.2312	0	0	2.3704	0	0	0	0.2681	0	0	0.1413	0	0	0	0	0	0	0	0	0	0	0	0	0	0
1.6382	240.122	0	0	0	0	0	0	0	0	0	0	0	0	0	0.3308	0.4089	0	0.107	0	0	0	1.1517	0	0.1538	0	0	0.2888	0.5541	0.599	0	0.8408	0	0.3283	0.2765	0.3964	0.2613	0	0	0	0	0	0	0	0	0	0	0	0	0
2.7431	240.122	0	0	0	0	1.2108	0	0	0.0043	0	0	0	0	0	0	0.1353	0	0	0	0	0	0	0	0.5815	0.0771	0	0.0065	0	0.3139	0	0	0	0	0	0	0	0	0	0	0	0	0	0	0	0	0	0	0	0
1.8479	240.119	0	0	0	0	0	0	0	1.4605	1.2735	1.189	1.2474	1.2418	1.2	1.7681	4.0169	1.629	3.495	2.4817	5.1534	1.4616	0	2.5636	5.4754	0	1.428	1.1493	2.7868	3.7287	0	1.9677	0.8719	2.636	2.3133	2.3859	0.9536	2.1155	2.6102	2.6277	4.3617	0	1.2066	1.2016	0.3834	0.2653	1.8589	0.98	0	0.8368
0.5846	240.115	0	0	0	0	0	0	0	0	0	0	0	0	0	0	0	0.1733	0.1332	0	0	0	0	0	0	0	0	0	0	0	0	0.1728	0	0.1251	0	0	0	0	0	0	0	0	0	0	0	0	0	0	0	0
0.7594	240.114	0	0	0	0	0	0	0	0	0.1609	0.2653	0	0	0	0	0	0.5182	0.166	0	0	0	0	0.4488	0	0	0.4779	0.6779	0.3203	0	0	0.8348	0	0	0	0	0	0	0.751	0	0	0.1995	0	0	0.2809	0	0	0	0	0
1.2049	240.093	0	0	0	0	0	0	0	0	0	0	0	0	0	0	1.34	0.5674	0	0.2614	0.7185	0.239	0	0.3815	0	0	0	0	0.2192	0.2256	0	0	0	0.6909	0	0	0.3515	0.2055	0.2157	0.3102	0.4111	0.157	0	0.4006	0	0.3043	0	0	0	0
2.1963	240.025	0	0	0	0	0	0	0	0	0	0	0	0	0.287	0	0	0	0	0	0	0	0	0	0	0	0	0	0	0	0	0	0	0	0	0	0.3848	0.2702	0	0	0.2794	0	0	0	0.6331	0	0	0	0	0
1.3391	240.003	0	0	0	0	0	0	0	0.2207	0	0.2324	0.2341	0.2005	0.2044	0	0.1388	0.1271	0.0369	0.1242	0.1408	0.2133	0.0977	0.1409	0	0.0735	0.1347	0.1695	0.0941	0.0778	0	0.1741	0.079	0	0.1119	0.1652	0.1029	0.0915	0.2371	0	0.1577	0	0.2461	0.3177	0.2032	0.4159	0.1144	0.2409	0.3569	0.3232
0.4514	239.201	0	0	0	0	0	0	0	0	0	0	0	0	0	0	0	0	0	0.1406	0	0	0	0	0	0	0	0	0.0702	0	0	0.085	0	0	0.0891	0	0.1248	0	0.1856	0	0	0	0	0	0	0	0.2619	0	0	0.187
1.7034	239.155	0	0	0	0	0	0	0	0.1677	0	0	0	0	0	0.2683	0	0	0	0	0	0	0	0	0	0	0	0	0	0	0	0	0	0	0	0	0	0	0	0	0	0	0	0	0	0	0	0	0	0
1.5312	239.151	0	0	0	0	0	0	0	0	0	0	0	0	0	0	0	0	0	0	0	0	0	0	0.3532	0	0.0834	0	0.289	0.3069	0	0.2802	0.1752	0.1755	0.1919	0	0.111	0.2368	0.6844	0.41	0.3016	0	0	0	0	0	0	0	0	0.648
2.2603	239.149	0	0	0	0	0	0	0	0	0	0	0.5444	0	0	0	0	0	0	0.8594	0.8013	0	0	0	0	0	0.3267	0	0.6692	0	0	0.3055	0	0	0	0	0	0.1592	0.4981	0	0.0367	0	0.395	0	0	0.6909	0	0.1927	0	0
0.8843	239.148	0	0	0	0	0	0	0	0	0	0	0	0	0	0	0	0.9495	0	0	0	0	0	0	0.394	0	0	0.4094	0	0	0	0.0483	0	0	0	0	0	0	0	0	0	0	0	0	0	0	0	0	0	0
3.0976	84.2716	0	0	0	0	0	0	0	0	0	0	0	0	0.0549	0	0	0.0767	0	0	0	0	0.0756	0	0.0111	0	0	0	0	0.0357	0.0722	0.0755	0.0177	0	0	0.0576	0.1162	0.0745	0	0	0	0	0	0.0486	0	0.0316	0.0107	0	0	0
2.419	84.0817	0	0	0	0	0	0	0	0	0	0	0	0	0	0.7291	0	0.6723	0	0	0	0	0	0	0	0	0	0	0	0	0	0	0	0	0	0	0	0	0	0	0	0	0	0	0	0	0	0	0	0
1.7726	84.081	0	0	0	0	0	0	0	0	0	0	0	0	0	0.247	0.1468	0	0	0.1224	0	0	0	0	0	0	0	0	0.1303	0	0	0	0.1194	0	0.0588	0	0	0	0	0	0	0	0	0	0	0	0	0	0	0
3.4233	84.0809	0	0	0	0	0	4.3307	0	5.5866	5.3519	4.9739	5.4691	4.6359	4.5906	0	3.1608	3.562	4.9799	3.6982	6.7656	5.8421	5.0874	6.3184	3.6553	2.9019	1.0983	4.0922	1.5861	1.5487	1.2181	2.1629	4.8987	1.9356	4.471	0.7684	5.0556	3.6848	4.1678	4.5575	0.3403	4.1426	4.6603	4.95	4.9897	7.964	4.572	10.5705	6.3207	8.1411
0.8237	84.0809	0	0	0	0	0	0	0	0.5474	0.552	0.5453	0.5983	0.5278	0.5522	0	0.2558	0.898	1.0026	0.468	1.5618	2.4208	1.5298	1.0977	0.2119	0.1311	0.1388	0.3227	0.1736	0.2615	0.2623	0.3246	0.836	0.309	0.3804	0.1527	1.9874	0.6751	0	0.2924	0.1871	1.0864	0.3983	0.3247	0.616	0.9019	0.4159	1.1837	1.188	1.1924
1.4066	84.0807	0	0	0	0	0	0	0	0	0	0	0	0	0	0	0	0	0	0	0	0	0	0	0	0	0	0	0	0.1312	0	0	0	0.1253	0	0	0	0.206	0	0.1723	0	0	0	0	0	0	0	0	0	0
1.0919	84.0806	0	0	0	0	0	0	0	0	0	0	0	0	0	0	0	0.0847	0	0.0918	0	0.2178	0.0806	0	0	0.6251	0	0.2179	0	0	0	0	0.1097	0	0.1189	0.2374	0.2153	0.5113	0	0	0	0	0	0	0	0	0	0	0	0
2.6466	84.0804	0	0	0.0589	0	0	0	0.3968	0	0.0249	0	0	0	0	0	0	0.2204	0	0	0.0782	0	0	0	0.0016	0	0	0	0	0	0	0	0	0	0	0	0	0	0.0227	0.0531	0	0	0	0.0586	0	0	0.0148	0.0395	0	0
2.0334	84.0456	0	0	0	0	0	0	0	1.2604	1.2507	1.416	1.3714	1.3553	1.2825	2.0639	2.557	1.4089	0.365	0.8805	2.4803	0.8067	0.1851	2.3588	1.7794	0.7546	0.7782	0.4189	1.7949	2.9402	0.9717	0.6673	0.1586	2.9174	1.3939	0.714	0.7478	2.4046	2.3582	2.7772	3.401	0.8021	0.5536	1.6356	0.803	0.6469	0.8252	1.42	0.1962	0.4827
0.7649	84.0448	0	0	0	0	0	0	0	0	0	0	0.1019	0	0	0.1458	0.164	0.1959	0.1077	0.1302	0	0.1776	0	0.2287	0	0.1437	0.1386	0.1744	0	0.1421	0.1394	0.2083	0.1448	0.1578	0.1687	0.2129	0	0	0	0.1572	0.1368	0	0.1607	0	0	0	0	0	0	0
2.2756	84.0448	0	0	0	0	0	0	0	20.0059	19.3466	18.203	19.2082	18.2833	18.3445	23.8812	37.2675	8.3872	22.9957	13.8487	16.3099	36.0462	18.1782	20.9657	25.0688	13.8106	21.6468	26.8067	21.1132	18.1589	8.333	29.7839	11.4005	20.7263	16.7619	30.556	4.3647	12.9889	20.7263	12.6395	21.1438	16.5692	27.6181	23.6073	14.4675	20.6601	17.4422	10.4818	27.6009	26.8747
2.4625	84.0447	0	0	0	0	0	0	0	0.0215	0	0.0168	0.1933	0.5696	0.5462	0.0477	0.6854	0.4561	0	0.4839	0.6659	0	0.4775	0.771	0	0.508	0.8643	0.8514	0.0891	0.2422	0.5042	0.9041	0.4278	0.6259	0.6315	0.8885	0.4591	0.5112	0.2857	0.5642	0.695	0	0.7784	0.5173	0	0.5796	0.5371	0.2347	0	0.7105
1.6714	84.0444	0	0	0	0	0	0	0	0	0	0	0	0	0	0.3571	0	0	0.4646	0.1837	0	0	0	0.5646	0.1067	0.2655	0.1	0.2518	0.1119	0.0947	0	0	0.3131	0.4638	0.1539	0.4809	0.3674	0	0	0.3654	0.3422	0.1579	0.4402	0	0	0	0	0	0	0
1.0751	84.0443	0	0	0	0	0	0	0	0	0	0	0	0	0	0	0	0	0.1387	0	0.3044	0.1219	0	0.1576	0	0	0.1762	0.2321	0	0	0.1152	0	0	0	0	0.1582	0	0	0	0.1402	0.1854	0	0.1771	0	0	0	0	0	0	0
1.3953	84.0442	0	0	0	0	0	0	0	0	0	0	0	0	0	0	0	0	0	0	0	0	0.1588	0	0	0.1271	0	0	0	0	0	0	0	0	0	0	0	0	0	0	0	0	0	0	0	0	0	0	0	0
2.6117	84.0441	0	0	0	0	0.026	0	0	0	0.0002	0	0	0	0	0	0	0	0	0	0.0002	0.1837	0	0.0002	0.0006	0	0	0	0	0	0	0	0	0.1471	0	0	0	0	0	0	0	0	0.0004	0.0003	0	0	0	0	0	0
2.0569	819.736	0	0	0	0	0	0	0	0	0	0	0	0	0	0	0	0	0	0	0	0	0.2612	0	0	0	0	0	0	0.1926	0	0	0	0	0	0	0	0	0	0	0	0	0.7571	0	0	0.9609	0	0.1659	0	0
3.0963	819.598	0	0	0	0.266	0	0	0	0	0	0	0	0.094	0.1587	0	0.1138	0	0	0.0687	0	0	0	0	0	0	0	0.1657	0	0	0	0	0.0694	0.1412	0	0	0	0	0	0	0	0	0	0	0	0	0.0142	0	0.1912	0
0.7843	819.509	0	0	0	0	0	0	0	0	0	0	0	0	0	0	0	0	0	0.5295	0	0	0.5297	0	0	0	0	0	0	0	0	0.1311	0	0	0.1174	0.3057	0	0	0	0	0	0	0	0	0	0	0	0	0	0
2.0583	819.07	0	0	0	0	0	0	0	0.3113	0.3786	0.3481	0.2686	0.411	0.4225	0.5618	0.4958	0.587	0.6517	0.568	0.7208	0.2639	0.5789	0.2391	0.3279	0	0.6687	0.5238	0.3956	0.1167	0.0751	0.1811	0.2114	0.247	0.4587	0.8489	0.4147	0.2016	0.2299	0.5376	0.3905	0.0558	0.3693	0.4133	0.2524	0.4067	0.645	0.2042	0.3935	0.4404
0.4525	818.617	0	0	0	0	0	0	0	0	0	0	0	0	0	0	0	0	0	0	0	0	0	0	0	0	0	0	0	0	0	0	0	0.1399	0	0	0	0	0	0.1561	0	0	0	0	0	0	0	0	0	0
2.0632	818.405	0	0	0	0	0	0	0	0	0.1218	0.1864	0.2918	0.2344	0.1551	0.2668	0.2867	0.2843	0.3032	0.2308	0.404	0.2131	0.3212	0.1146	0.18	0	0.4396	0.2653	0.149	0.0888	0	0.1316	0.1352	0.1809	0.3599	0.2879	0.2014	0.117	0.5725	0.3471	0.1251	0	0.4624	0.2307	0	0.56	0.2447	0	0	0.3587
2.0635	817.737	0	0	0	0	0	0	0	0	0	0	0	0	0	0	0	0	0	0	0	0	0.1748	0	0.093	0	0	0.1792	0.0959	0.0592	0	0	0	0	0.1635	0	0	0.0574	0	0.1307	0	0	0	0.1406	0	0	0	0	0	0
0.4355	817.167	0	0	0	0	0	0	0	0	0	0	0	0	0	0	0	0	0	0	0	0.048	0.0847	0	0	0	0	0	0	0	0	0	0	0.0357	0	0	0	0.0623	0	0	0	0	0	0	0	0	0	0	0	0
2.0681	817.074	0	0	0	0	0	0	0	0	0	0	0	0	0	0	0	0	0.146	0	0.1618	0.0692	0.1418	0	0.0798	0	0.1373	0.1397	0	0	0	0	0.0509	0	0	0	0	0.0629	0	0	0	0	0	0	0	0	0.1273	0	0	0.1733
0.4748	816.634	0	0	0	0	0	0	0	0.3083	0	0	0	0	0	0	0.126	0	0	0	0	0	0	0	0	0	0	0	0	0	0	0.0777	0	0	0	0	0.1739	0	0	0	0	0	0	0	0	0	0	0	0	0
0.4189	816.559	0	0	0	0	0	0	0	0	0	0	0	0	0	0	0	0	0	0	0	0	0	0	0	0	0	0	0	0	0	0.0501	0.0409	0	0	0	0	0	0	0	0	0	0	0	0	0	0	0	0	0
1.763	816.196	0	0	0	0	0	0	0	0	0	0	0	0	0	0	0	0	0	0	0.1189	0	0	0	0.0813	0	0	0	0	0	0	0	0	0	0	0	0	0	0	0	0	0	0	0	0	0	0	0	0	0
0.8018	815.51	0	0	0	0	0	0	0	0	0	0	0	0.155	0.1207	0	0	0	0	0	0	0	0	0	0.1168	0	0	0.1577	0	0	0	0.1071	0.0588	0	0	0.1048	0.0519	0	0	0	0.1562	0	0.2527	0	0	0	0.1752	0	0	0
0.5653	813.678	0	0	0	0	0	0	0	0	0	0	0	0	0	0	0	0	0	0	0	0	0	0	0	0	0	0	0	0.1427	0	0	0.1495	0	0	0	0	0.0739	0	0	0	0	0	0	0	0	0	0	0	0
3.0907	813.591	0	0	0	0.2001	0	0	0	0.2706	0.2448	0.1763	0.1629	0	0.1432	0.1885	0.1358	0	0	0.1552	0.2265	0	0	0	0.1812	0	0.1113	0.1345	0.0923	0	0	0.1241	0	0.109	0	0.2047	0	0.1243	0.1556	0.1336	0.1493	0	0.2063	0	0	0	0.1716	0	0.1301	0
3.0742	812.591	1.5491	0	0	0	0	0	0	0.1641	0.1065	0.0737	0	0	0	0.1448	0	0	0.005	0	0	0.045	0	0	0.0346	0.0496	0	0	0.0376	0	0	0	0.0064	0	0	0	0	0	0	0	0	0	0.1041	0.1004	0	0	0	0	0	0
0.5918	390.202	0	0	0	0	0	0	0	0	0	0	0	0	0	0	0	0.2407	0	0	0	0	0	0	0	0	0	0	0	0	0	0	0	0	0	0	0	0	0	0	0	0	0	0.2094	0	0	0	0	0	0
1.6732	390.195	0	0	0	0	0	0	0	0	0	0	0	0	0	0	0	0	0	0	0	0	0	0	0	0	0	0	0	0	0	0	0	0	0	0	0	0	0	0	0	0	0	0.3902	0	0	0.2268	0	0	0.297
1.0085	390.121	0	0	0	0	0	0	0	0	0	0	0	0	0	0	0	0	0	0.1544	0	0	0	0	0.1217	0.1111	0.1194	0	0	0	0	2.6289	0	0	0	0	0	0	0	0.5638	0	0	0	0	0	0	0	0	0	0
2.8047	390.059	0	0	0	0	0	0	0	0	0.0817	0.0665	0	0.0277	0	0.1018	0.024	0.064	0.1122	0.1409	0.1192	0.1145	0	0.1617	0.087	0.1231	0.3124	0.1073	0.0525	0.0966	0.1114	0	0.1121	0.2971	0.1089	0	0	0.1068	0	0.1646	0	0	0.0543	0	0	0.0277	0.1187	0	0	0.0329
0.553	389.262	0	0	0	0	0	0	0	0.1678	0	0	0	0	0.1102	0	0	0	0	0	0	0	0	0.0781	0	0.074	0	0	0.2139	0	0	0	0	0	0	0	0.1318	0	0	0	0.0988	0	0	0	0	0	0	0	0	0
2.1052	389.179	0	0	0	0	0	0	0	0	0	0	0	0	0	0	0	0	0	0	0	0	0	0.6519	0	0	1.0067	0	0	0	0	0	0	0	0	0	0	0	0	0	0	0	0	0	0	0	0	0	0	0
0.9594	389.177	0	0	0	0	0	0	0	0	0	0	0	0	0	0	0	0	0	0	0	0	0	0	0	0	0	0	0	0	0	0	0	0	0	0	0	0	0	0	0	0	0	0.2241	0	0	0	0	0	0
0.7621	389.162	0	0	0	0	0	0	0	0.426	0.4414	0.4455	0.4481	0.4946	0.4492	0	0	8.2805	0	0	0	0	0	0	0	0	0	0	0	0	0	0	3.3345	0	0	0	0	3.7841	0	0	0	0	0	0	1.6754	0	0	0	0	0
0.4321	389.123	0	0	0	0	0	0	0	0	0	0	0	0	0	0	0	0	0	0	0	0	0	0	0	0	0	0	0	0	0	0	0	0	0	0	0.0633	0	0	0	0	0	0.1196	0.1257	0	0	0	0	0	0
3.0973	389.12	0.2278	0	0	0	0	0	0	0.0525	0.2053	0.2094	0.7017	0.4066	0.4488	0	0	0	0	0	0	0	1.2398	0.4026	3.6316	2.4752	1.1383	1.3902	0.2675	1.4476	0.1232	0	1.7719	0.1764	0.1661	0	0.545	0.6044	0	0.2524	0.8891	2.274	0	0	0.2416	0.6696	0	0.5116	0	0.3497
3.2206	389.12	0.4082	0	0	0	0	0	0	0	0	0	0	0.1371	0	0	0	0	0	0.0173	0	0	0	0	0	0	0	0	0	0	0	0	0.0691	0	0	0	0	0.0125	0	0	0	0.0767	0	0	0	0	0	0	0.0331	0.1257
1.177	389.104	0	0	0	0	0	0	0	0	0	0	0	0	0	0	0	0	0	0	0	0	0	0	0	0	0	0	0	0.0673	0	0	0	0	0	0	0	0	0	0	0.2573	0	0	0	0	0	0	0	0	0
2.0006	388.301	0	0	0	0	0	0	0	0	0	0	0	0	0	0	0	0.0509	0	0	0	0	0	0	0.3583	0	0	0	0.1182	0.9732	0.2195	0	0	0	0	0	0	0	0	0	0	0.1518	0	0.3913	0	0	0	0	0	0
0.6088	388.254	38.4865	34.1588	68.2047	22.9924	30.2854	26.814	29.1029	17.4896	16.7327	16.5737	17.8384	17.8544	19.0307	12.3313	5.3489	8.127	16.9164	101.134	13.5448	7.9047	4.8844	39.0662	34.9392	28.8231	26.3829	19.0649	118.543	7.1165	38.1413	29.2798	18.7835	5.5094	28.0589	20.8108	7.965	8.5648	24.2666	6.7471	37.9053	20.1131	2.4703	2.4659	2.3375	6.5366	47.4785	5.7526	3.85	4.0307
1.5924	388.179	0	0	0	0	0	0	0	0	0	0	0	0	0	0	0.3521	0	0.1244	0	0	0	0	0	0	0	0	0	0	0	0	0	0	0	0.1347	0.1869	0	0	0	0	0	0	0	0	0	0	0	0	0	0
0.5703	388.144	0	0	0	0	0	0	0	0	0	0	0	0	0	0	0.0844	0	0	0	0	0.1091	0	0	0	0	0	0	0	0	0	0	0	0	0	0	0	0	0	0	0	0	0	0	0	0	0	0	0	0
1.0152	241.104	0	0	0	0	0	0	0	0	0	0.3518	0.36	0.4115	0	0.383	0.3077	0	0	0.1255	0.5938	0.3386	0.2924	0.6253	0.7579	0.5558	1.8226	0.6391	0.5963	0.2604	0.3966	0.3776	0.3691	0	0.4097	0.5136	0.6154	0.2644	0.8152	0.5139	0.6946	0.4631	0.4713	0	0	0.7206	0.3368	0	0	0.8013
2.636	241.098	5.2589	0	0.057	0.6368	0	0	0	0	0	0.0451	0	0	0	0	0.588	0	0	0.5479	0.3023	0.3696	0	0.3242	0.0543	0.3073	0.6223	0	0	0	0	0.2349	0.1427	0.4427	0.0795	0.4499	0.3153	0.0447	0.4802	0.5495	0	0.0489	0	0	0	0	0.4665	0.1314	0	0
0.5191	241.112	0	0	0	0	0	0	0	0	0	0	0	0	0	0	0	0.1732	0	0	0	0	0	0.3005	0	0.1315	0	0.2046	0	0	0.3936	0	0	0	0	0	0	0	0	0	0	0	0.4781	0.2665	0	0	0	0	0	0
0.8651	241.084	0	0	0	0	0	0	0	1.1618	1.0453	1.004	1.1241	0.9803	0.9061	6.0317	0.5607	0.1507	1.1544	0.4628	4.7582	1.1418	1.5131	1.7093	1.6509	0.6881	3.5422	1.79	1.1053	1.0009	0.5876	1.5217	0.8772	0.5889	4.7815	4.9924	0.7157	1.6216	1.5779	1.1864	1.7427	1.0323	1.3206	0.4501	1.0923	0.8497	0.6688	1.4963	0.5094	0.8237
1.1222	241.046	0	0	0	0	0	0	0	0.1833	0.2706	0.2145	0.2306	0.2151	0.1949	0.5456	0	0	0	0	0.6349	0	0	0	0.6387	0.5999	0.3937	0.913	0	0.3059	0.4062	0.6035	0.1571	0	0.3274	0.2342	0	0	0	0	0.3612	0.0668	0	0	0	0	0.1319	0	0	0.2338
3.0351	240.987	0.6951	0	0	0	0.0402	0	0	0.2576	0.2949	0.3183	0.3607	0.344	0.4358	0.3437	0.3866	0.3286	0	0.7861	0.549	0.2287	0.5328	0.6562	0.8307	0.6018	1.1274	0.4411	0.7144	0.2814	0.7231	0.7253	0.4864	0.2042	0.613	0.9485	0.311	0.4209	0.4799	0.1503	0.4327	0.2393	0.601	0.1852	0	0	0.4859	0.3233	0	0.4588
0.8396	240.232	0	0	0	0	0	93.3895	0	0	0	0.7173	0	0	0	0	0	0	0.0166	0	0	0	0	0	0	0	0	0	0	0	0	0	0	0	0	1.1254	0	0	0	0	0	0	0.1257	0	0.4349	0	0	0	0	0
0.5663	240.232	0	0	0	0	0	0	49.7067	0.4044	0	0	0.3696	0.8676	0.9216	0	0	0	0.4332	0	0	0.3846	0	0	0.3888	0	0	0.139	0	0	0	0	0	0	0	0.3309	0	0	0	0	0.6786	0	0.7882	0.9552	1.4314	0.4872	0.6419	1.0789	1.3939	1.4716
2.0962	240.231	0	0	0	0	0	0	0	2.5702	0	1.0552	1.2213	0	0	2.1892	0	1.7081	0.9496	1.2771	0	0.3527	0	0.4218	0	0.5918	0.0145	0	0.5787	0	0	0	0	0	0	1.4721	0	0	0.8858	0	0	0.1281	0.264	0	2.1627	2.0093	0	2.6342	2.457	0
3.2968	240.231	0	0	0	9.182	0	5.4212	0	0	0	0	0.0454	0.4257	0	0	0	0	0	0	0	0	0	0.311	0	0	0	0	0.2878	0	0	0	0.1097	0	0	0	0	0	0	0	0	0.1483	0	0	0.1758	0	0.3422	0	0	0
2.5029	240.231	0	0	0	0	0	0	0	0	0	0	0	0.1741	0	0	0.8563	0.7969	0.9841	0.1421	0	0	0	0	0.3438	0	0.0824	0.2498	0.1083	0	0	0.26	0	0	0	0	0.0993	0.1541	0.5188	0	0	0.3132	0.5111	0	0	0	0	0	0	0
1.8558	240.231	0	0	0	0	0	0	0	0	0	0	0	0	0	0	0	0	0	0	0	0	0	0	0	0	0.5461	0	0	0	0	0	0	0.1631	0	0	1.0644	0	0.4746	0	0	0	0	0	0	0	0	0	0	0
2.7843	240.23	0	8.7817	0	0.1915	0	0	0	0	0	0	0	0	0	0	0.9008	0.3345	0.245	0.1058	0.5707	0.1418	0.0996	1.6136	0.1302	1.0421	0.0896	1.2161	0.1397	0.4785	0.1532	0	0.2487	0.1701	0.0765	0.0701	0.182	0.1772	0.2402	0.8766	0.0534	0.0888	0	0	0	0.013	0.792	0	0	0
1.0921	240.23	0	0	0	0	0	0	0	0	0	0.8354	0.2122	0.077	0	0.394	0.105	0.1196	0.4713	0	0	0	0	0	0.8388	0	0.5663	0	0	0.0345	0	0.1441	0	0	0	0	0	0	0	0.6967	0	0	0.0539	0	0	1.1417	0	1.1711	0.8126	0
1.6131	240.23	0	0	0	0	0	0	0	0.1166	0.7792	0.8769	0.4785	0.3703	0.4624	0	0.0415	0.0492	0.0179	0.0426	0.7038	0.2909	0	0.5568	0.8476	0.1422	0.805	0.6638	0	0	0	0	0.3794	0.0666	0.4562	0.6295	0	0	0.2646	0.1136	0.9471	0	0.0672	1.1606	0.0924	1.6773	0.832	0.4602	0	0.7896
2.2528	240.23	0	0	0	0	0	0	0	0	0	0	0	0.1672	0.0851	0.1285	0	0.1344	0.0465	0	0	0	0	0.1024	0.0369	0.5573	0	0	0	0	0	0	0	0	0	0.054	0	0.082	0	0.5893	0.1085	0	0	0	0	0.2606	1.0449	0	0	0
3.1216	86.096	0	0	0	0	0.0306	0	0	0	0	0.0074	0	0	0	0	0	0	0	0	0.1318	0	0	0.2276	0	0.1186	0	0	0	0	0	0	0	0	0	0.2048	0	0	0.0677	0.091	0.2763	0	0.0799	0	0.296	0	0	0	0	0
0.5499	86.0958	0	0	0	0	0	0	0	0.3517	0.2011	0.3106	0.3904	0.3839	0.3441	1.0374	0.1079	0.1222	0.1573	0.3886	0.4499	0.4178	0.1106	1.304	0.8352	0.6716	0.5236	2.0603	0.3756	0.4181	0.2433	0.7256	0.168	0	0.0744	0.9787	0.1964	0.3774	0.1799	0	1.2826	0.1072	0.5059	0	0	0	0.2741	0.3785	0	0
2.2843	86.0951	0	0	0	0	0	0	0	0	0	0	0	0	0	0	0	1.0737	0	0	2.2239	0	0	0.2274	0	0	0	0	0	0	0.2546	0	0	0	0	0.1551	0	0	0	0	0	0	0	0	0	0	0	2.9327	0	0
1.3166	86.0715	0	0	0	0	0	0	0	3.902	3.6244	3.342	3.849	3.1531	3.0526	4.4187	2.7478	3.1459	2.4921	2.4554	3.9965	2.4429	2.1982	3.3079	2.6536	2.0273	3.5872	3.6687	2.4161	1.5741	2.0102	2.5212	1.9104	2.4484	2.5211	3.4321	2.1289	1.9611	4.1016	3.0511	2.6379	1.6613	3.4261	2.9811	3.9349	4.335	3.4522	4.6492	3.6237	3.3103
1.0768	86.0689	0	0	0	0	0	0	0	0	0	0	0	0	0	0	0	0	0.1518	0	0	0.1248	0	0.1835	0	0	0.1967	0.2387	0	0.1392	0.1044	0	0	0.1027	0	0.176	0	0	0	0	0.2799	0	0.2252	0	0	0	0	0	0	0
0.8491	86.0656	0	0	0	0	0	0	0	0.5878	0.9781	0.5806	0.6062	0.5852	0.6017	0.8072	1.4669	1.1402	1.1771	0.7393	1.801	1.5973	0.9576	1.1898	0.6302	0.8745	1.3239	0.9872	0.6317	0.3861	0.5148	1.1548	0.706	1.0691	0.5703	1.0351	1.1418	0.9851	1.06	1.2531	1.6334	0.3253	1.2822	0.7862	0.4055	0.7429	0.5069	0.8902	0.8546	0.5353
0.7395	85.0554	0	0	0	0	0	0	0	0	0	0	0	0	0	0	0.3019	0	0	0	0	0	0	0	0	0.2384	0	0.321	0	0	0	0.2667	0.1911	0	0.1941	0.1489	0.2654	0.2308	0	0.1107	0	0	0	0	0	0	0	0	0	0
3.2714	85.0294	0	0	0	0	0	0	0	0.2513	0	0	0	0	0	0	0.1895	0	0	0	0	0	0	0	0	0	0	0	0.406	0	0	0	0	0	0	0	0.0705	0	0.6717	0	0	0.0345	0	0	0	0.1314	0	0.4583	0	0
1.4585	85.0292	0	0	0	0	0	0	0	2.3369	2.6077	3.5757	2.9084	3.617	3.2884	2.6137	3.366	2.7915	2.1478	1.6356	6.1211	5.3472	10.5729	3.9081	7.4531	6.5824	6.1693	4.6821	3.1012	2.6891	2.4152	1.8741	3.7094	2.7991	3.287	3.9243	5.3041	3.637	3.0283	4.02	8.2116	3.3944	1.7872	2.8991	3.2209	2.4033	2.3751	3.2495	2.7149	5.0696
2.9701	85.0288	0	0	0	0	0	0	0	4.6024	4.477	3.9288	4.3359	3.7193	3.6383	7.0755	5.5361	8.8416	5.6815	5.1702	4.6635	6.0623	1.9872	7.5944	3.1223	2.6678	8.0665	6.2456	3.7354	4.673	5.9217	8.1639	3.4441	5.6289	4.5473	5.1547	6.2595	4.6357	10.5152	3.863	4.7082	7.773	3.5662	1.9625	3.5358	4.9275	4.4166	3.0133	2.6271	1.046
2.7329	85.0288	0.2356	0	0.027	1.7451	0	0	0	0.7342	0.8308	0.6854	0.8213	0.8142	1.0571	3.9276	1.6853	1.3452	0.6716	0.103	2.4521	2.0426	0.5368	1.9971	1.1235	0.8776	1.3328	1.0667	0.1595	0.7443	1.2077	2.2458	1.0689	0.7005	1.1711	0.9784	0.8994	0.6094	0	0.2153	1.0003	0.6424	1.6749	0.3362	0.6629	0.4783	1.4955	0.4081	0.7013	0.1788
2.4286	85.0288	0	0	0	0	0	0	0	4.3449	4.0575	4.1196	4.2546	3.9583	3.72	3.6529	3.7657	6.0658	1.757	3.2731	2.8287	4.507	3.1735	5.1408	3.4743	5.7837	6.7024	7.1102	2.2456	4.4272	4.0797	3.0403	0	5.7384	5.0612	3.624	6.3897	0	8.8078	4.8344	8.0272	4.0441	1.9798	3.4734	5.0232	3.3893	4.1126	3.4976	2.0521	2.8598
1.7969	85.0287	0	0	0	0	0	0	0	3.7891	3.43	3.052	3.6257	0	3.0336	4.1644	4.3504	5.6904	4.5504	2.3306	2.4069	1.4772	0.6716	4.8497	0	0	0	0.5315	2.4509	0.2722	2.793	2.0484	6.2843	5.4431	4.029	5.8688	12.9114	0.5279	5.2876	0.4108	0	2.3293	6.1149	6.9783	5.7629	0	4.2221	3.9221	0	2.1343
2.0544	85.0287	0	0	0	0	0	0	0	0.9099	0.9216	0.7963	0.511	0.8001	0.6788	0	0	0	0	0	0	0	0.7797	0.1119	0.9619	1.9502	1.1051	1.7021	0.205	1.8132	0.2082	0.0757	1.8441	1.2233	1.0113	0.33	0.9406	0.7525	0.9244	0.8306	1.564	1.3718	0	0	0	0	0	0	0	0
3.1311	84.8133	0	0	0	0	0	0	0	0	0	0	0	0.0029	0	0	0	0	0	0	0	0	0	0	0	0	0	0	0	0	0.0673	0	0	0	0	0	0.0749	0	0	0	0	0	0	0	0	0	0	0	0	0
3.1112	84.3878	0	0	0	0	0	0	0	0	0	0	0	0	0	0	0	0	0	0.0609	0	0	0.0112	0	0	0	0	0	0	0	0.0833	0	0	0.021	0.0605	0	0.1129	0.0671	0	0	0	0	0	0	0	0	0	0	0	0
0.6652	828.513	0	0	0	0	0	0	0	0	0	0	0	0	0	0	0	0	0	0.1754	0	0	0	0	0	0	0.0872	0	0.1128	0	0.1226	0	0	0	0	0	0	0	0	0	0	0	0	0	0	0	0	0	0	0
0.4483	824.763	0	0	0	0	0	0	0	0.3084	0	0	0	0	0	0.2187	0	0.2474	0	0	0	0	0	0	0	0	0	0	0	0	0	0	0	0	0	0	0	0	0	0	0	0.1049	0	0	0	0	0	0	0	0
0.4344	824.179	0	0	0	0	0	0	0	0.2114	0.2138	0.1511	0.2253	0.1831	0.1131	0.1864	0.2755	0.0491	0	0.0889	0.168	0.5101	0.3039	0.094	0.1393	0.201	0.3464	0.1874	0.3264	0.2765	0.1368	0.5051	0.0715	0.4502	0.166	0.295	0	0.4181	0.1335	0.0967	0.0854	0.0853	0.1354	0	0	0	0	0	0.1685	0.3919
0.4858	823.157	0	0	0	0	0	0	0	0	0	0	0	0	0	0	0	0	0.0463	0	0	0.1841	0	0	0	0.1435	0	0.1257	0	0.0642	0.0369	0.078	0	0.0727	0.0991	0	0	0.0702	0.1066	0	0.1048	0.0411	0	0	0	0	0	0	0	0
0.5033	823.124	0	0	0	0	0	0	0	0	0	0	0	0	0	0	0.0975	0.0665	0.3206	0	0	0	0.0476	0	0	0	0	0	0	0.6702	0.2584	0	0.0472	0.0429	0	0	0	0.1003	0	0	0	0.1403	0	0	0	0	0	0	0	0
0.4514	822.748	0	0	0	0	0	0	0	0.273	0	0	0	0	0	0	0	0	0	0	0	0	0	0	0	0	0	0	0	0	0	0	0	0	0	0	0	0	0	0	0	0	0.5094	0	0	0	0	0	0	0
0.4969	822.544	0	0	0	0	0	0	0	0	0	0	0	0	0	0	0	0	0	0	0	0	0	0	0	0	0	0	0	0	0	0	0	0.0628	0	0	0	0	0	0.222	0	0	0	0	0	0	0	0	0	0
0.565	822.193	0	0	0	0	0	0	0	0.1572	0.1223	0.083	0.1216	0.1446	0.1352	0.0658	0.3801	0.0651	0.2581	0.3796	0	0.2688	0.3705	0	0	0	0.0895	0	0.0915	1.6453	0.2744	0.4589	1.1289	0.2976	0.9325	0	0.1909	0.8051	0	0.0649	0	0.4667	0	0.2477	0.1204	0	0.1251	0	0.2128	0
2.0719	821.731	0	0	0	0	0	0	0	0	0	0	0	0	0	0	0	0.3581	0	0	0	0	0	0	0	0	0	0.4406	0	0	0	0	0	0	0	0	0	0	0	0	0	0	0	0	0	0	0	0	0	0
3.082	821.591	0	0	0	0	0	0	0	0	0	0	0	0.0588	0	0	0.1634	0.0837	0	0	0.2186	0	0	0.1325	0.1247	0	0.1544	0	0.0363	0	0	0	0	0	0	0.1009	0.0067	0.0397	0	0	0.1743	0	0	0.2207	0	0.027	0	0.0704	0	0
0.4338	821.169	0	0	0	0	0	0	0	0	0	0	0	0	0	0	0.1173	0	0	0	0	0	0	0.0474	0	0	0	0	0	0.056	0	0	0	0	0	0	0	0	0	0	0	0	0	0	0	0	0	0	0	0
2.0607	821.067	0	0	0	0	0	0	0	0.1241	0.4379	0.4001	0	0.5353	0	0.0627	0.0512	0.7053	0.6445	0.3339	0.8388	0.1854	0.6724	0.4021	0.3954	0.0464	0.3335	0	0.4626	0.2159	0	0	0	0.3127	0.5212	0.6279	0.1216	0.2175	1.0463	0.537	0.3378	0	0.2875	0.4902	0.3473	0.7283	0.6208	0.2695	0	0.2579
0.4622	820.599	0	0	0	0	0	0	0	0	0	0.1279	0	0	0	0	0.0613	0	0	0	0	0.0822	0	0	0	0	0	0	0.0956	0	0	0	0	0.4256	0	0.0941	0	0	0	0.3919	0	0	0	0	0	0.2222	0	0	0	0
3.0988	820.601	0	0	0	0	0	1.2919	0	0	0.2161	0.1037	0	0.162	0.1822	0	0	0.1692	0.0522	0	0.1952	0	0.1624	0.1823	0.1484	0.1436	0.0732	0.186	0.0896	0	0.0796	0.085	0	0	0	0	0.0804	0	0	0	0.1704	0.0954	0.2897	0.1793	0.0385	0	0.0857	0	0.1998	0
2.0621	820.402	0	0	0	0	0	0	0	0	0.3658	0	0	0.1534	0.447	0.4341	0.5279	0	0.5114	0.1411	0.2788	0.3402	0.025	0.2916	0.2755	0	0	0.4976	0.0505	0.1646	0.077	0.1683	0	0.2484	0.5211	0	0	0	0.75	0.6337	0	0.0724	0.2788	0.3394	0	0.6935	0	0.2544	0	0.8136
2.0369	820.067	0	0	0	0	0	0	0	0	0	0	0	0	0	0	0.0562	0	0	0	0	0	0	0	0	0	0	0	0	0	0	0	0	0	0	0	0	0	0	0	0	0	0	0.1552	0	0	0	0	0	0.2618
1.15	392.279	0	0	0	0	0	0	0	0.1893	0	0	0.1706	0.2053	0.2137	0.217	0.6237	0	0.134	0.2758	0.2808	0.172	0	0.2246	0.1875	0.0457	0	0	0.3694	0.308	0.1095	0.1438	0.104	0.6899	0.2243	0	0.3406	0.1262	0.2491	0.26	0.3864	0.1063	0	0.3126	0	0	0	0	0	0
1.8803	392.261	0	0	0	0	0	0	0	0	0	0	0.1792	0	0	0.2391	0.0734	0	0	0	0.1781	0.2391	0.1771	0.0453	0	0	0.2085	0.1812	0	0.1089	0	0	0.0689	0	0	0.1825	0.1426	0	0.2524	0.111	0.1827	0.0672	0.1497	0.2065	0	0	0	0	0	0
0.4347	392.173	0	0	0	0	0	0	0	0	0	0	0	0	0	0	0	0	0	0	0	0	0	0	0	0	0	0	0	0	0	0	0	0	0	0	0	0	0	0	0	0	0	0	0	0	0	0	0	0
0.9788	392.151	0	0	0	0	0	0	0	0	0	0	0	0	0	0	0.0836	0	0	0	0	0	0	0	0	0.1023	0	0	0	0.077	0	0	0	0	0	0	0	0	0	0	0	0	0.154	0	0	0	0	0	0	0
0.6456	392.126	0	0	0	0	0	0	0	0	0	0	0	0	0	0	0	0	0	0	0	0	0	0	0	0.8046	0	0	0	0	0.2939	0	0.1189	0.1609	0	0	0	0	0	0.2047	0	0	0	0	0	0	0	0	0	0
0.4276	392.056	0	0	0	0	0	0	0	0	0	0	0	0	0	0.0823	0	0	0	0	0	0.0568	0	0	0	0	0	0	0	0	0	0	0.0482	0	0	0.1305	0	0	0	0	0	0	0.1223	0	0	0	0	0	0	0
0.4577	391.34	0	0	0	0	0	0	0	0.5448	0.4587	0.3877	0.4007	0.3723	0	0.4518	0.2613	0.2726	0.2761	0.2783	0.3803	0.3625	0.2501	0.3548	0.3795	0.2677	0.242	0.3884	0.3053	0.1191	0.2221	0.2007	0.0589	0.3271	0.206	0.266	0.2559	0.205	0.362	0.3172	0.2518	0.1086	0.7901	0.3971	0.2707	0	0.377	0.4136	0.3683	0.3904
0.5791	391.209	0	0	0	0	0	0	0	0	0	0	0	0	0	0	0	0	0	0	0.3441	0	0	0	0.1464	0.237	0	0	0	0	0	0	0	0	0	0	0	0	0.4655	0	0.4128	0	0	0	0	0	0	0.4852	0	0
0.7297	391.196	0	0	0	0	0	0	0	0	0	0	0.1861	0	0.1716	0.1431	0.1156	0.323	0.2904	0	0	0	0	0.3349	0.1627	0.1721	0	0.116	0	2.3887	0.1867	0.2202	0.097	0.1816	0.0774	0	0.1317	0.1171	0.163	0.0971	0.138	0	0	0	0	0	0	0	0	0
1.1765	391.184	0	0	0	0	0	0	0	0	0	0	0	0	0	0	0	0	0	0	0	0	0	0	0	0	0	0.2155	0	0	0	0	0	0	0	0	0	0	0	0	0	0	0	0	0	0	0	0	0	0.2381
1.4828	391.175	0	0	0	0	0	0	0	0	0	0	0	0	0	0	0	0	0	0	0	0	0.4788	0	0	0.1097	0	0.3174	0.3449	0.1504	0	0	0	0.0572	0	0	0	0.1749	0	0	0	0.2294	0	0	0	0	0	0	0	0
3.4464	391.133	0	0	0	0	0	0	0.868	0	0.084	0.0903	0.0795	0	0	0.1311	0	0	0	0	0	0	0	0	0	0.0177	0	0	0	0	0	0	0	0	0	0	0	0	0	0	0	0	0.4861	0.3567	0.4133	0	0.1592	1.147	0	0.34
0.9474	391.13	0	0	0	0	0	0	0	0	0	0	0	0	0	0	0.1435	0	0	0	0	0.1285	0	0.1612	0	0.1633	0	0.2007	0	0.1355	0.0935	0.1335	0.099	0.1575	0.1145	0	0.0769	0	0	0	0.1471	0.1518	0	0	0	0	0	0	0	0
2.0591	391.05	0	0	0	0	0	0	0	0	0	0.1855	0.2598	0.0994	0.2156	0.2287	0.1853	0.2825	0.1981	0.2253	0.3188	0.1957	0.1957	0.136	0.2205	0	0.3677	0.2641	0.2299	0.1179	0.065	0.1793	0.1281	0.1549	0.1767	0.4568	0.1879	0.0936	0.3646	0.341	0.2	0.0723	0.4952	0.2879	0.2176	0.336	0.2735	0.2008	0	0.3575
1.2505	390.264	0	0	0	0	0	0	0	0	0	0	0	0	0	0	0.7072	0	0	0	0	0	0	0	0	0	0	0	0.2575	0	0	0	0	0.1794	0	0	0.1629	0	0	0	0	0	0	0	0	0	0	0	0	0
0.7195	390.238	0	0	0	0	0	0	0	0	0	0	0	0	0	0	0	0	0	0	0	0	0	0	0	0	0	0	0	0	0	0	0	0	0	0	0	0	0	0	0	0	0	0	0	0	0	0	0	0
0.6728	242.114	0	0	0	0	0	0	0	0	0	0	0	0	0	0.2129	0	0	0	0	0.1828	0	0	0	0	0	0	0.2016	0	0.1482	0	0.2052	0.2654	0	0	0	0	0	0	0	0	0	0	0	0	0	0	0	0	0
1.3583	242.101	0	0	0	0	0	0	0	0.2643	0.2897	0.2558	0.2943	0.2971	0.2781	0.1266	0.2231	0.2486	0.2009	0.2273	0.2042	0.2218	0	0.2613	0	0.1279	0.1857	0.4395	0	0.1259	0.2948	0.3133	0	0.1816	0.1788	0.2414	0.1325	0.2128	0	0.1845	0.2692	0.0789	0.2605	0.4638	0.3068	0	0.309	0.2434	0.2627	0.4173
0.8602	242.1	0	0	0	0	0	0	0	0	0	0	0	0	0	0	0	0.435	0	0	0	0	0	0	0.1662	1.2646	0	0	0	0.5804	1.1579	0	0	0.5434	0	0	0	0.6379	0.1507	0	0	0	0	0.4435	0	0	0	0	0	0.6814
2.2768	242.08	0	0	0	0	0	0	0	0	0	0	0	0	0	0.1602	0	0	0	0	0.2845	0.2908	0	0	0.2869	0	0	0	0	0	0	0.1186	0	0	0	0	0	0	0	0	0.2818	0	0	0.4451	0	0	0	0	0	0.4631
1.6369	242.078	0	0	0	0	0	0	0	0	0	0	0	0	0	0.141	0	0	0	0	0	0.1878	0	0	0	0.0563	0.214	0.3342	0	0	0.1236	0	0.131	0.1181	0	0	0.0963	0.1325	0.3417	0	0	0.0734	0.2536	0	0	0	0	0	0	0
1.5348	242.05	0	0	0	0	0	0	0	0	0	0	0	0	0	0.732	0.5356	0.3932	0.304	0	0	0	0	0.254	0	0	0	0	0	0	0	0	0	0	0	1.3945	0	0	0	0	0	0	0.2701	0	0	0	0	0	0	0
1.1419	242.046	0	0	0	0	0	0	0	0	0	0	0	0	0	0	0.1975	0.2966	0.3575	0	0	0.1751	0.2295	0	0	0	0	0	0	0.4903	0.1486	0	0.4953	0.2854	0.2703	0	0	0.0825	0	0	0	0.3209	0	0.2569	0	0	0	0	0.4007	0.2762
0.5082	242.013	0	0	0	0	0	0	0	0	0	0	0	0	0	0	0	0.2001	0.0576	0	0.224	0.1855	0	0.5677	0.4559	0	0.3171	0.2863	0	0	0	0.1049	0	0	0	0.2019	0.0624	0	0.3032	0	0.1627	0	0	0	0	0	0	0	0	0
0.7376	242.013	0	0	0	0	0	0	0	0.3209	0	0.3138	0.2873	0.1669	0	1.1334	1.2188	0.4016	0	0.2979	0.204	0.7588	0	0.6754	0.2272	0	0.297	0.1337	0.6762	0.766	0	0.3726	0	0.7118	0.2721	2.4424	0.1329	0	0	0	0.5756	0	0.9067	0.7263	0	0	0.3361	0.1657	0	0
0.468	241.182	0	0	0	0	0	0	0	0	0.5237	0.278	0	0	0	0.3046	0.1172	0.2666	0.159	0.2631	0.3788	0.2161	0.2805	0.9759	0.2907	0.2235	0.3392	0.3578	0.2781	0.1085	0.2081	0.2377	0.2111	0.2386	0.2574	0.3309	0.2198	0.2068	0.3401	0.2987	0	0.1636	0	0.4605	0.3766	0.5924	0	0	0.413	0.2962
0.8566	241.17	0	0	0	0	0	0	0	0	0	0	0	0	0.4123	0	0	15.8041	0	0	0	0	0	0	0	0	0	0	0	0	0	0	0	0	0	0	0	0	0	0	0	0	0	0	5.6431	0	0	0	0	0
1.2677	241.165	0	0	0	0	0	0	0	0	0	0	0	0	0	0	0	0	0	0	0	0	0	0	0	0	0	0	0	0.1305	0	0	0	0	0	0	0	0	0	0	0	0	0	0	0	0	0	0	0	0
1.9692	241.154	0	0	0	0	0	0	0	0	0	0	0	0	0	0	0	0	0	0	0	0	0	0	0	0	0	0	0	0.077	0	0	0	0	0	0	0	0	0	0	0.4142	0	0	0	0	0	0	0	0	0
1.7395	241.147	0	0	0	0	0	0	0	0	0	0	0	0	0	0	0.2456	0	0	0	0.4814	0	0	0.516	0.2402	0.0669	0	0	0	0.1809	0	0.2687	0	0.7409	0.5041	0.5963	0.2483	0	1.0199	0	1.2684	0.2059	0	0	0	0	0	0	0	0
1.4985	241.143	0	0	0	0	0	0	0	2.579	2.4902	2.2735	2.5519	2.2834	2.2728	1.1731	1.0587	1.079	0.7984	1.4544	1.6992	0.1577	1.3096	1.6022	4.448	3.8597	3.3186	2.6905	2.7181	1.6676	1.142	0.9695	1.6896	1.3501	1.9601	1.831	5.1056	2.0586	2.4687	2.7721	6.0089	2.001	1.001	2.3201	1.1691	2.2311	2.5137	3.1401	0	2.6266
1.8689	241.114	0	0	0	0	0	0	0	0	0	0	0	0	0	0	0	0	0	0	0	0	0	0	0	0	0	0	0	0	0.3618	0	0	0	0	0	0	0	0	0	0	0.1809	0	0	0	0	0	0	0	0
1.3563	90.0551	0	0	0	0	0	0	0	0.2985	0.3466	0.2857	0.3343	0.3172	0.3228	0.2529	0.357	0.3613	0.2736	0.3003	0.1909	0.3036	0.0947	0.3129	0.2543	0.218	0.3077	0.3832	0.0893	0.2631	0.3925	0.3694	0.1183	0.2811	0.2414	0.3156	0.1915	0.1237	0.3562	0.2287	0.435	0.1103	0.3131	0.4125	0.3375	0.3445	0.3627	0.2937	0.2925	0.4017
0.8603	90.0397	0	0	0	0	0	0	0	0	0.0953	0	0	0.0934	0.0888	0.2211	0.1339	0.0961	0.1184	0.0713	0.1366	0.2764	0	0.1045	0.1018	0.1116	0.0942	0.1344	0.0919	0.0489	0.074	0.0894	0.0891	0.0952	0.0892	0.2357	0.1316	0.0825	0.1291	0.0827	0.1175	0	0.2761	0	0	0	0	0	0	0
2.4383	89.0603	0	0	0	0	0	0	0	0	0.1208	0	0	0.3502	0.2918	0	0.4374	0	0.2747	1.2548	0.4592	0	0.4403	1.4219	0.6042	0.3125	1.0603	0.2254	0	0	0.5634	1.4782	0.3019	0	0.3564	1.3345	0.1715	0.442	0.2105	0	0.4825	0.5211	0	0	0	0	0.7403	0	0	0
2.2901	89.0602	0	0	0	0	0	0	0	0.5243	0.7625	0.7267	0.5175	0.7519	0.5429	0.5465	0	0.4539	0.4142	3.5056	1.171	0	0.3365	0.8996	0.9974	1.0743	0.7553	0.4419	1.7919	0.1067	0	0.823	0.2844	0	0.9202	0.8229	0.57	0.272	0.4879	0	1.2469	0.3939	0	0	0	0	1.7712	0.4324	0	0
0.6169	89.0599	0	0	0	0	0	0	0	2.2556	2.2142	2.2158	2.2051	2.0757	2.0625	1.2282	1.0512	1.377	2.0573	11.3178	2.6447	1.1408	0.7919	4.8142	3.6365	2.185	3.3815	2.4805	7.5304	1.1118	3.3152	2.9558	1.7282	1.1205	2.3983	2.63	1.0488	1.102	2.5104	1.5117	3.7966	1.6206	1.1743	0.8365	1.0937	1.9878	7.033	1.3127	0.668	1.4518
2.6232	89.0599	0	0	2.5074	0	0	0	0	0	0	0	0.0072	0	0.0012	0.0189	0	0	0	0.1626	0	0	0	0	0.1356	0.1183	0	0	0.1202	0	0.1119	0	0	0	0	0.1835	0	0	0	0.0027	0	0.0048	0.0006	0	0	0	0	0.0387	0	0
0.4516	89.0594	0	0	0	0	0	0	0	0	0	0	0	0	0	0.2006	0	0.3057	0.1025	0.2207	0.3541	0.116	0	0.1163	0	0.0775	0	0.3797	0.1525	0	0	0.1704	0.2475	0.1735	0.1755	0.1169	0.0985	0.2383	0.1512	0.3652	0	0	0.34	0.692	0	0	0	0.2335	0.7083	0
3.2805	88.0758	0	0	0	0	0	0	2.5284	0	0	0.2937	0.3021	0	0.22	0.5141	0.0343	0	0.2186	0	0	0	0	0	0	0	0	0.1712	0.2247	0.4179	0.3713	0.4635	0.5791	0	0.3091	0	0	0.3277	0.2389	0.3738	0.2985	0	0.4148	0	0	0	0.1203	0	0.0318	0
2.3833	88.0567	0	0	0	0	0	0	0	0	0	0	0	0	0	0	0	0	0	0	0	0.1799	0	0	0	0	0	0	0	0.1379	0	0	0	0	0	0	0	0	0	0	0	0	0	0	0	0	0	0	0	0
3.1121	87.3554	0	0	0	0	0	0.208	0	0	0	0	0	0	0	0	0	0	0	0	0	0	0	0	0	0	0	0	0	0	0.0836	0.0319	0	0	0	0	0.0903	0.0201	0	0	0	0	0	0	0	0	0.0286	0	0	0
2.2813	87.0446	0	0	0	0	0	0	0	0	0	0	0	0	0	0	0	0	0	0.5767	0.168	0	0	0.25	0.2924	0.186	0	0	0.4918	0	0.2254	0.2081	0.1747	0	0.1507	0	0	0	0	0	0.2605	0	0	0	0	0	0.2959	0	0	0
1.0433	87.0444	0	0	0	0	0	0	0	0	0	0	0	0	0	0	0.1955	0	0	0	0	0	0	0.3132	0	0.1071	0	0	0	0.335	0.266	0	0	0.2761	0	0	0	0.2278	0	0.1964	0.3723	0.1027	0	0	0	0	0	0	0	0
0.6192	87.0404	0	0	0	0	0	0	0	0	0	0	0	0	0	0	0	0	0.1949	0.3009	0	0	0	0	0	0.225	0	0	0.2544	0.2145	0.2056	0	0.1075	0	0	0	0	0	0.2383	0	0	0	0	0	0	0	0.4207	0	0	0
1.5302	86.0968	0	0	0	0	0	0	0	3.3051	3.0903	2.6535	2.9955	2.6708	2.6838	7.075	1.9853	1.1537	1.728	2.7133	0.8866	0	0	4.1784	2.6937	2.9033	1.519	4.3881	1.9929	0	0.9743	2.9508	3.6201	0	0	6.1778	0	0	6.1242	0	0	0.5371	7.3182	0.9305	1.0775	1.9122	2.9051	0	0.9438	0
1.9209	86.0967	0	0	0	0	0	0	0	0	0.2757	0.1802	0.2293	0.1559	0.2281	1.4729	0	0	0	0.2267	0.2313	0	0	0.697	0	0	0	0.5688	0	0	0	0.3187	0	0	0	0.9947	0	0	0	0	0	0	1.6686	0	0	0	0	0	0	0
2.5568	86.0967	0	0	0	0	0	0	0	2.1197	1.9459	1.8343	1.9845	1.8019	1.7677	1.7663	2.1742	2.8447	1.3394	2.3925	1.0618	1.0087	3.6705	2.6444	3.6849	5.0306	1.03	7.9031	5.9168	0.9992	3.9389	1.7674	3.3178	1.1429	2.4336	3.1987	2.8532	2.1658	1.6672	0.7699	5.0659	1.2464	0.7244	0.8785	0	0	1.4392	0.4805	0	1.1567
0.4596	834.614	0	0	0	0	0	0	0	0	0	0	0	0	0	0	0	0	0	0	0	0	0	0	0	0	0	0	0	0	0	0	0	0.4598	0	0	0	0	0	0.5345	0	0	0	0	0	0.1897	0	0	0	0
0.5439	834.17	0	0	0	0	0	0	0	0	0	0	0	0	0	0	0	0	0	0	0	0	0	0	0	0	0	0	0	0.0639	0.0497	0	0	0	0	0	0	0	0	0	0	0	0	0	0.1262	0	0	0	0	0
0.5487	833.839	0	0	0	0	0	0	0	0	0	0	0	0	0	0	0	0.0686	0	0	0	0	0	0	0	0	0	0	0	0.0291	0	0	0	0	0	0	0	0	0	0	0	0	0	0	0	0	0	0	0	0
0.4164	833.247	0	0	0	0	0	0	0	0	0	0	0	0	0	0	0	0	0	0	0	0	0	0	0	0	0	0	0	0	0	0	0	0	0	0.062	0	0.0496	0	0	0	0	0	0	0	0	0	0	0	0
1.4405	832.537	0	0	0	0	0	0	0	0	0	0	0	0	0	0	0	0	0	0	0	0	0	0	0	0	0	0	0	0	0	0	0	0	0	0	0	0	0	0	0	0.0565	0	0	0	0	0.1141	0	0	0
0.4103	832.236	0	0	0	0	0	0	0	0	0	0	0	0	0	0.0996	0	0.0982	0	0	0	0	0.0711	0	0	0.2888	0	0	0	0	0	0	0	0	0	0.0709	0	0.3671	0	0.0699	0	0.0735	0.4528	0	0	0	0	0	0	0
0.4335	831.679	0	0	0	0	0	0	0	0	0	0	0	0	0	0.1137	0.0974	0	0	0	0	0	0	0	0	0	0	0	0	0	0	0	0	0	0	0	0	0	0	0	0	0	0	0	0	0	0	0	0	0
0.503	831.635	0	0	0	0	0	0	0	0	0	0	0	0	0	0	0	0	0.233	0	0	0	0	0	0	0	0	0	0	0.3852	0.1078	0	0	0	0	0	0	0	0	0	0	0	0	0	0	0	0	0	0	0
1.2481	831.218	0	0	0	0	0	0	0	0	0	0	0	0	0	0	0	0	0	0	0.0673	0	0	0.0621	0	0	0	0	0	0	0	0	0	0	0	0	0	0	0	0	0.0726	0	0	0	0	0	0	0	0	0
0.4323	831.187	0	0	0	0	0	0	0	0	0	0	0	0.0621	0.0808	0	0.2554	0	0.0511	0.0713	0.0585	0.2304	0	0.1117	0.0531	0.1061	0.2099	0.1111	0.2173	0.2379	0.0385	0.3014	0	0.2458	0.0865	0.1587	0	0.1276	0	0	0	0	0	0	0	0	0	0	0	0
0.4273	830.621	0	0	0	0	0	0	0	0	0	0	0	0	0	0	0	0	0	0	0	0	0	0	0	0	0	0	0	0	0	0	0	0	0	0	0.065	0	0	0	0	0	0	0	0	0	0	0	0	0
3.0912	830.618	0	0	0	0	0	0	0	0	0	0	0	0.0887	0.0104	0.0143	0	0	0	0.0503	0	0	0	0	0	0	0	0	0	0	0	0	0	0	0	0.1645	0	0	0	0.1272	0.115	0	0	0	0	0	0	0	0	0
0.5559	829.689	0	0	0	0	0	0	0	0	0	0	0	0	0	0	0	0	0	0	0	0	0	0	0	0	0	0	0	0.1015	0	0.073	0	0	0	0	0	0	0	0	0	0	0	0	0	0	0	0	0	0
3.0923	829.607	0	0	0	0	0	0	0.0417	0	0	0	0	0	0	0	0	0	0.0378	0	0	0	0	0	0.0877	0	0.0383	0	0	0	0	0	0.0318	0	0	0.0413	0	0	0	0.1662	0.0707	0.1069	0	0	0	0	0.1747	0.2017	0	0
0.5491	829.188	0	0	0	0	0	0	0	0	0	0	0	0	0	0	0.077	0.0831	0.0451	0.0589	0	0.0423	0.0463	0	0	0	0	0	0	0.1189	0.0437	0	0.1265	0	0	0	0	0.0699	0	0	0	0.0924	0	0	0.1065	0	0	0	0	0
1.4862	828.517	0	0	0	0	0	0	0	0	0	0	0	0	0	0	0	0	0	0	0	0	0	0	0	0	0	0	0	0	0	0	0	0	0	0	0	0	0	0	0	0	0	0	0	0	0	0	0	0.2392
2.0865	393.296	0	0	0	23.6971	0	0	0	0	0.1386	0	0	0	0	0	0	0	0	0	0	0	0	0	0	0	0	0	0	0	0	0	0	0	0	0	0	0	0	0	0	0	0	0	0	0	0	0	0	0
0.8065	393.295	54.3393	0	0	0	0	0	0	0	0	0	0	0	0	0	0	0.3763	0	0	0	0	0.7355	0	0	0	0	0	0.0696	0	0	0	0	0	0	0	0	0	0	0	0	0	0	1.1125	0	0	0	0	0	1.0315
1.8597	393.293	0	0	0	0	0	0	46.7518	0	0	0	0	0	0	0.1318	0	0	0	0	0	0	0	0	0	0	0	0	0	0	0	0	0	0	0	0	0	0	0	0	0	0	0	0.6951	0	0	0	0	0	0
0.4441	393.292	0	0	0	0	32.1556	0	0	0.2827	1.0329	0.4319	0.2907	0	0	0.4355	0	0.1879	0	0	0.4158	0	0	0.2014	0.2754	0.1911	0	0.3606	0	0	0	0	0	0	0.1897	0.0807	0.296	0	0.5821	0	0.4154	0.0857	0	0.4348	0.28	0.6663	0.6036	0.4903	0	0.2233
2.4654	393.222	0	0	0	0	0	0	0	0.6349	0.6963	0.2711	0.5376	0.4588	0.5718	0.8172	1.7087	0.7331	1.1263	0.6453	1.7014	0.7491	0.1286	1.5439	0.4801	0.6587	0.9385	0.974	0.9697	0.1841	0.3699	0.6769	0.1315	1.1036	0.7403	0.6455	0.646	0.3983	1.0711	0.4916	0.5083	0.3453	1.0496	0.8382	0.2438	0	0.7581	0.8217	0	0.4035
0.8953	393.222	0	0	0	0	0	0	0	0.2123	0	0	0	0.1724	0.1635	0.643	0.1297	0	0	0.22	0.5115	0.1797	0	0	0.3867	0.0349	0.0835	0.2182	0.2417	0	0.1481	0.2458	0	0	0	0	0.2466	0.1329	0.3211	0.3056	0.152	0.2121	0	0	0	0	0.2963	0	0	0
0.6098	393.211	0	0	0	0	0	0	0	1.5852	1.6074	1.1509	1.1457	1.13	1.2079	1.3067	0.4328	1.0557	1.3509	9.589	1.6457	0.6292	0.6186	3.0175	2.0223	3.0074	2.3055	1.8412	9.6447	0.5698	3.0847	1.9697	1.6692	0.3108	2.2162	1.8386	0.9186	0.8897	1.8827	0.477	3.1705	1.6195	0.2307	0	0	0.3565	3.6134	0.7788	0.3313	0.5477
1.7193	393.188	0	0	0	0	0	0	0	0	0	0	0	0	0	0	0	0	0.1652	0	0	0	0	0	0	0	0	0	0	0	0.0965	0	0	0	0	0	0	0	0	0	0	0	0	0	0	0	0	0	0	0
0.9204	393.164	0	0	0	0	0	0	0	0	0	0	0	0	0	0.2443	0	0	0	0	0	0	0	0.2833	0	0	0	0.3516	0	0.2004	0	0	0	0.074	0	0	0	0.1063	0.2145	0.1171	0	0	0.4377	0	0	0	0	0	0	0
0.7081	393.152	0	0	0	0	0	0	0	0.364	0.2849	0.3419	0.314	0.2818	0.3862	0.9414	0	0.199	0.3786	0.107	1.3685	0.1052	0.2822	0.1903	0.439	0.2162	0.8034	1.009	0.1571	0.5919	0.2344	0.5435	0.3251	0.3194	0.6961	0.5496	0	0.255	0.1934	0.3041	0.5042	0.0667	0.4026	0.1545	0	0	0	0.2851	0	0
1.1381	393.151	0	0	0	0	0	0	0	0.5756	0	0.6833	0.4693	0.593	0.4166	0.8104	0.867	0.6811	0.6936	0.5863	0.8367	0.6458	0.2398	0.9679	0.656	0.603	0.8093	1.0459	0.8353	0.7994	0.6935	0.5994	0.5363	0.8556	0.7852	0.9939	0.8696	0.7119	1.0122	0.8737	1.0531	0.4806	0.7083	0.319	0.2991	0	0.5851	0.1243	0	0.352
1.7278	393.141	0	0	0	0	0	0	0	0	0	0	0	0	0	0	0.2433	0	0.1122	0	0	0	0	0	0	0	0	0	0	0	0	0	0	0	0	0.3601	0.1848	0	0	0	0	0	0.2704	0	0	0	0	0	0	0
2.2772	393.115	0	0	0	0	0	0	0	0	0	0	0	0	0	0	0	0	0	0	0	0	0	0	0	0	0	0	0	0	0	0.2032	0.4577	0	0	0	0.1936	0	0.3064	0	0	0	0.2459	0	0	0	0.1938	1.0616	0	0.1838
1.4838	393.059	0	0	0	0	0	0	0	0.1114	0	0	0	0	0	0	0	0.0894	0.0729	0.0693	0	0	0	0	0	0	0	0	0	0	0	0	0	0	0	0	0	0	0	0	0	0	0	0.1662	0	0.2123	0	0	0.2444	0.1656
2.0545	393.048	0	0	0	0	0	0	0	0.1783	0	0.2091	0	0.27	0.2438	0.1989	0.1943	0.1947	0.297	0.2376	0.2253	0.1718	0.2744	0.1467	0.1279	0.0912	0.2771	0.2925	0.2099	0.1237	0	0.1724	0.1456	0.1222	0.2356	0.3246	0.239	0.1584	0.5394	0.3748	0.2534	0.0684	0.4628	0.274	0	0.339	0.1119	0	0.1832	0.3985
3.0478	392.937	0	0	0	0	0	0	0	0	0	0	0	0	0.0122	0	0	0	0	0	0	0	0	0	0.1116	0	0	0	0	0	0	0	0.0053	0	0	0	0.0116	0	0.2903	0	0	0	0	0	0.0097	0.0212	0	0	0	0
1.1964	243.174	0	0	0	0	0	0	0	0	0	0	0	0	0	0	0.1658	0	0	0	0	0	0	0	0	0	0	0	0	0	0	0	0	0	0	0.1211	0	0	0	0	0	0	0	0	0	0	0	0	0	0
2.7397	243.17	0	0	0	0	0	0	1.9654	0	0	0.1467	0	0.4916	0	0.5695	0.1777	0.4292	0.2742	0.0448	0.3059	0	0.0838	0	0.489	0.4151	0.266	0.6463	0.0872	0.3794	0.21	0.3237	0.0754	0.3695	0.4916	0	0.1915	0.2903	0	0.1534	0.4568	0.2228	0	0.028	0	0	0	0	0	0
1.4245	243.159	0	0	0	0	0	0	0	6.187	6.0274	5.5428	6.1267	5.6043	5.4725	1.0253	0.9498	0.9298	0.653	1.2008	1.2355	1.0174	11.8375	3.5581	14.1347	11.8611	9.8605	7.5041	6.3025	3.1174	1.9751	2.226	7.256	2.3136	3.6894	4.2412	9.8896	4.2509	5.8287	5.6424	15.2013	7.7077	0.7705	6.6639	6.5572	3.7983	5.0186	7.0331	2.1797	8.7365
2.0925	243.134	0	0	0	0	0	0	0	8.5547	8.2978	8.316	8.6167	8.7756	9.089	13.632	20.055	2.8716	5.8961	4.1558	8.8573	6.5094	0.7948	13.0948	18.3461	2.298	3.2544	2.1205	9.9702	18.8655	6.4818	5.8878	6.0359	12.6206	12.45	15.5941	2.4382	16.0167	22.231	16.125	13.6993	2.5111	6.5943	8.5337	2.3195	4.1573	4.1109	4.6279	2.3257	3.3127
2.2234	243.134	0	0	0	0	0	0	0	3.6499	3.3844	3.4906	3.4505	3.6607	3.8707	5.9232	8.2849	7.2275	12.8937	1.8862	18.6531	2.9109	2.5233	5.6929	8.695	4.5451	5.7755	4.9697	6.4415	6.7356	2.6612	2.5475	3.1305	5.0922	6.5907	7.3974	5.225	5.2373	9.878	7.865	11.1688	5.6492	3.2265	2.7362	0	1.1803	1.8214	3.9495	0.9032	1.6748
0.5777	243.127	0	0	0	0	0	0	0	0	0	0	0	0	0	0	0	0	0	0	0.3265	0.1467	0	0.4241	0.2602	0.3708	0.6615	0.2685	0.1901	0	0	0	0	0	0.2397	0.35	0.3613	0.1502	0.3398	0	0	0	0.3637	0	0	0	0.2162	0	0.2804	0
1.1473	243.099	0	0	0	0	0	0	0	0	0	0	0	0	0	0	0.3214	0.1799	0.1313	0.1216	0	0.1497	0.1078	0	0.2517	0	0.2179	0	0.1452	0.0851	0	0	0	0.0878	0	0	0	0	0.3231	0	0	0	0	0	0	0	0.2951	0	0	0
1.4427	243.088	0	0	0	0	0	0	0	0	0	0	0	0	0	0	0.2158	0	0	0	0	0.115	0	0	0	0	0	0	0	0	0	0	0	0	0	0	0	0	0	0	0	0	0	0	0	0	0	0	0	0
0.6621	243.094	0	0	0	0	0	0	0	0.5657	0.3733	0.3798	0.321	0.342	0.362	0.3067	0.456	0.4643	0.5401	0.2848	0.7095	0.7643	0.7319	0.658	0.3138	0.466	0.6472	0.5944	0.4582	0.1046	0.3593	0.4105	0.2069	0.336	0.5785	0.7371	0.3976	0.9805	0.8246	0.5175	0.324	0.2473	0.4874	0.2955	0.1952	0.8268	0.2747	0	0.5482	0.4624
0.8699	243.055	0	0	0	0	0	0	0	0	0	0.1565	0	0	0.339	0.6402	0.4786	0	0.0716	0	0	0.5452	0	0.6789	0.4043	0.3284	0	0.3192	0.0992	0.1911	0.2224	0.4726	0.1934	0	0	0.7446	0.2617	0.2177	0	0	0	0	0.5914	0	0	0	0	0	0.1929	0
1.5403	243.047	0	0	0	0	0	0	0	0.2258	0	0	0	0	0	1.1741	0	0	0	0	0	0.3128	0	0.5462	0	0	0	0	0	0	0	0.6655	0	0	0.3708	0	0	0	0	0	0	0	0.6157	0	0	0	0	0	0.2215	0
2.5281	243.043	0	0	0	0	0	0	0	0	0	0.2361	0	0	0	0	0	0	0	0	0	0	0	0	0	0.1357	0	0	0	0	0	0	0	0	0	0	0	0	0	0	0	0	0	0	0	0	0	0	0	0
0.4232	243.031	0	0	0	0	0	0	0	0	0	0	0	0	0	0	0	0	0.095	0	0	0	0	0	0	0	0	0.3224	0	0.0257	0	0	0	0	0	0	0	0.187	0	0	0	0	0	0	0	0	0	0	0	0
0.5786	242.284	0	0	36.8395	25.43	40.0671	0	24.594	0	0	0	0	0	0	0	0	0.3109	0.2782	0.1456	0	0.3981	0.3457	0	0.4873	0.1407	0.3554	0.5086	0.1554	0.1378	0.2679	0.2637	0.1737	0	0.3397	0	0.2737	0	0.3615	0.4556	0.3061	0.1615	0.4362	0	0	0	0.3597	0.2946	0	0.3569
1.7134	242.139	0	0	0	0	0	0	0	0	0	0	0	0	0	0	0.3752	0.3336	0.2768	0.2143	0.6303	0	0	0.6026	0.5033	0	0	0	0	0.3528	0	0.4412	0	0.6903	0.2167	0	0.3408	0	0	0	0.4742	0.1994	0	0	0	0	0	0	0	0
1.1256	242.132	0	0	0	0	0	0	0	0	0	0	0	0	0	0	0	0	0	0	0	0	0	0	0	0	0	0	0	0	0	0.2074	0	0.3988	0	0	0	0	0	0	0	0	0	0	0	0	0	0	0	0
3.1051	92.9838	0	0	0	0	0	0	0	0	0	0	0	0	0.0277	0	0	0.1003	0	0	0	0	0.1076	0	0	0	0	0.0619	0	0	0.1278	0.0809	0	0.032	0.0559	0.0119	0.0539	0	0	0.0603	0.0177	0.0036	0	0	0	0	0	0	0	0.0332
3.1007	92.9008	0	0	0	0.6574	0	0	0.0178	0	0	0	0.0328	0	0.0197	0	0	0.0769	0	0	0.0134	0.0651	0.0812	0	0	0	0	0	0	0	0.0801	0.038	0	0.074	0.0715	0	0.0477	0	0	0.0408	0	0	0.0915	0	0	0	0	0	0	0
3.1137	92.8282	0	0	0	0	0	0.247	0	0	0	0	0	0	0	0	0	0	0	0	0	0	0.0943	0	0	0	0	0	0	0	0.0674	0	0	0.052	0	0	0.0789	0	0	0	0	0	0	0	0	0	0	0	0	0
3.1017	92.7754	0	0	0	0	0	0	0	0	0	0.035	0.0217	0	0.0335	0	0	0.0986	0	0	0	0.082	0	0	0	0	0	0	0	0.0493	0	0	0.0267	0.0914	0.0547	0.0651	0	0	0	0	0	0	0	0	0	0	0	0	0.0127	0
0.8005	92.0499	0	0	0	0	0	0	0	0.6023	0.5163	0.4755	0.5325	0.5041	0.5419	0.9109	0.6067	0.7687	0.347	0.5275	0.5074	1.145	0.1716	0.904	0.7334	0.5992	0.6913	1.0961	0.4659	0.6447	0.6264	1.4066	0.5176	1.08	0.5857	0.9698	0.6133	0.3986	0.4574	0.9393	0.7199	0.2252	1.2847	0.3755	0.3822	0.3225	0.573	0.4899	0.4826	0.1412
0.5453	92.0498	0	0	0	0	0	0	0	0.6179	0.5842	0.5394	0.5725	0.4853	0.5068	0.609	1.2699	1.585	0.491	0.5919	0	0.4062	0.7045	0	0	0.174	0.4593	0	0.387	1.2835	1.0508	0.588	1.1242	0.4901	0.5221	0	1.0427	0.8378	0	0.3983	0	0.696	0.4922	0.7925	1.2991	0	0.45	0	0.6645	0.3374
2.4978	92.0497	0	0	0	0	0	0	0	1.3571	1.2645	1.1667	1.1825	1.1249	1.1037	2.499	1.7136	1.9675	1.0029	0.9964	1.4753	1.9568	0.3182	2.0812	1.2058	1.2679	0.8221	1.5903	0.4448	1.2139	1.2597	1.0685	0.837	1.7799	1.2501	2.3448	0.9527	0.7296	0.538	1.5297	1.2471	0.4473	1.7935	0.6063	0	0.7892	1.1203	1.6378	0.7053	0.4209
1.8107	91.0551	0	0	0	0	0	0	0	0	0	0	0	0	0	0	0	0	0	0	0	0	0	0	0	0	0	0	0	0	0	0.0495	0	0	0	0	0	0	0	0	0	0	0	0	0	0	0	0	0	0
1.6656	91.0546	0	0	0	0	0	0	0	0	0.4702	0.65	0.3417	0.8894	0.5426	0.6303	0.1842	0	0	0	0	0.2417	0.1842	0.432	0.3863	0.4892	0.8434	0	0.2216	0.3349	0.1241	0	0	0	0.3376	0	0	0.3701	0.4436	0.5121	0.2633	0.2016	0	0	0.235	0	0	0	0	1.0122
0.6786	91.0545	0	0	0	0	0	0	0	0	0	0	0	0.3441	0	0.4196	0.3894	0.6237	0.4436	0	0.5964	0.5438	0.4711	0.572	0.4575	0.4027	0.4436	0.375	0	0.04	0.2218	0	0.25	0.4194	0	0	0.3218	0.3541	0	0.5364	0.4796	0.3982	0.538	0.5224	0	0	0	0	0.7364	0.498
2.2751	91.0544	0	0	0	0	0	0	0	4.06	4.2674	3.8015	3.8135	3.4791	3.7217	4.9603	6.5123	1.6906	4.0442	2.7631	2.9933	6.8915	3.8346	4.1737	4.9126	2.7765	4.2473	5.0149	4.0846	3.3922	1.8791	5.6158	2.1115	4.1704	3.2889	5.9564	0.8953	2.6321	4.3652	2.6127	4.0823	3.054	5.0085	4.9395	2.9398	4.5452	3.6336	2.302	5.9662	5.48
0.4737	91.0543	0	0	0	0	0	0	0	0.4432	0.6292	0	0.3112	0.268	0	0.3773	0.9096	0.4719	0.7339	0	0.894	0.2403	0.5756	0.7658	0.7544	0.2317	0.3686	1.0866	0.1246	0.3883	0.5998	0.3229	0.4602	0.1986	0.2547	0.4619	0.6754	0.8122	0.9821	0.3672	0.7902	0	0.8613	0.7421	0	0	0.4205	0.7089	0.9205	0.4189
2.0912	91.0541	0	0	0	0	0	0	0	0	0	0	0	0	0	0	0.1324	0.2763	0	0	0	0	0	0	0	0	0	0	0	0	0.2149	0	0	0	0	0	0	0	0	0	0	0	0	0	0	0	0.2684	0	0	0
1.1708	91.0536	0	0	0	0	0	0	0	0.2662	0.2066	0	0	0	0	0	0	0	0	0	0	0	0	0	0	0	0.2042	0	0.3622	0	0	1.0901	0.7283	0.0854	0	0	0	0	0.4523	0	0.0957	0	0	0	0	0	0	0	0	0
0.8482	91.0535	0	0	0	0	0	0	0	0	0	0	0	0	0	0	0	0	0.0504	0	0	0	0	0	0	0.0457	0	0	0	0	0	0	0	0.3408	0	0	0	0.1015	0	0	0	0	0	0	0	0	0	0	0	0
2.3913	90.091	0	0	0	0	0	0	0	0.3993	0.1893	0.3334	0.3854	0.3103	0.3143	0.3176	0.4109	0	0.3433	0	0	0	0.2877	0.4389	0	0.2996	0	0	0	0.2012	0.3832	1.6012	0.1779	0.2003	0	0	0	0	0	0	0	0.2898	0	0.3118	0	0	0	0	0	0
2.3724	841.204	0	0	0	0	0	0	0	0	0	0	0	0	0	0	0	0	0	0	0	0	0	0	0	0	0	0	0	0.0629	0	0	0	0	0	0	0	0	0	0	0	0.0357	0	0	0	0	0	0	0	0
0.5009	840.15	0	0	0	0	0	0	0	0	0	0	0	0	0	0	0.1774	0.1529	0.4612	0	0	0.0637	0.0519	0	0	0	0	0	0	0.8252	0.308	0	0.0969	0.0497	0.0759	0	0	0.0951	0	0	0	0.1766	0	0	0	0	0	0	0	0
0.5478	839.843	0	0	0	0	0	0	0	0	0	0	0	0	0	0	0	0	0.0762	0	0	0	0	0	0	0	0	0	0	0	0	0	0	0.1268	0	0	0.102	0	0	0	0	0.2413	0	0	0	0	0	0	0	0
0.5486	839.514	0	0	0	0	0	0	0	0	0	0	0	0	0	0	0	0	0.1229	0	0	0.0976	0	0	0	0	0.0585	0	0	0.174	0.0804	0.1553	0.1857	0	0	0	0.0643	0.1814	0	0	0	0.2467	0	0	0	0	0	0	0	0
0.5451	839.178	0	0	0	0	0	0	0	0	0	0	0	0	0	0	0.15	0.2185	0.1056	0.1313	0	0.1013	0.109	0	0	0	0	0	0	0.2231	0.0701	0.1113	0.1298	0.0578	0.0715	0	0.0655	0.0978	0	0	0	0.1091	0	0	0.3503	0	0	0	0	0
0.4324	838.195	0	0	0	0	0	0	0	0.3009	0.2402	0.3009	0.3371	0.2768	0.2172	0.4301	2.6344	0	0.9579	0.4527	0.2897	0.8684	0.0884	1.8312	0.3641	0.6678	1.2914	0.5256	1.3489	1.6764	0.1471	1.3502	0.106	1.3794	0.6406	1.0286	0	0.3917	0.1244	0	0	0.0923	0.329	1.041	0.109	0.1343	0.2402	0.1362	0.3353	0.3109
0.5055	838.123	0	0	0	0	0	0	0	0	0	0	0	0	0	0	0	0	0.0562	0	0	0	0	0	0	0	0	0	0	0.1367	0	0	0	0	0	0	0	0	0	0	0	0	0	0	0	0	0	0	0	0
0.5487	837.702	0	0	0	0	0	0	0	0	0	0	0	0	0	0	0.0787	0.1037	0.1006	0.0969	0	0.0629	0.0852	0	0	0	0	0	0	0.0753	0.0864	0.107	0	0.0589	0.1118	0	0.0564	0	0	0	0	0.1651	0	0	0.1363	0	0	0	0	0
3.091	837.592	0	0	0	0	0	0	2.8122	1.9559	2.332	2.282	2.7138	3.0213	3.0121	1.7355	2.7091	3.7832	1.8823	2.8828	4.1085	2.9229	3.1866	2.5875	2.3864	1.7356	2.6212	3.5178	0.8865	1.8814	3.4247	3.2248	2.0507	3.3501	2.9175	3.2676	3.9792	2.6453	1.5975	3.454	2.0269	1.1302	5.0112	3.9543	1.0827	3.4805	3.0247	0.6839	2.2964	3.0325
0.5663	837.197	0	0	0	0	0	0	0	0	0	0	0	0	0	0	0	0	0.0412	0.1085	0	0.0508	0.0681	0	0	0	0	0	0	0.5538	0	0.1686	0.4359	0.0784	0.392	0	0	0.2392	0	0	0	0	0	0	0	0	0	0	0	0
3.0912	836.595	0	0	3.4361	0	0	0.3586	0	1.7132	1.7866	1.7694	1.6337	1.9754	1.9759	1.383	1.9622	2.3961	1.2999	1.7892	2.8722	1.915	2.3538	1.7883	1.4837	1.0947	1.7851	2.4839	0.8156	1.2145	2.2253	1.9877	1.3209	2.2176	2.1378	2.2363	2.6556	2.0118	1.2998	2.3281	1.2276	0.6163	3.0369	2.9242	0.925	2.28	2.1671	0	2.1462	2.1345
0.4813	836.575	0	0	0	0	0	0	0	0	0	0	0	0	0	0	0.0907	0.1201	0	0	0	0	0	0	0	0	0	0	0	0.075	0	0	0	0	0	0	0	0	0	0.142	0	0	0	0	0	0	0	0	0	0
0.4983	836.139	0	0	0	0	0	0	0	0	0	0	0	0	0	0	0	0.0692	0	0	0	0	0	0	0	0.0465	0	0	0.0769	0	0	0	0	0	0	0	0	0	0	0	0	0	0	0	0	0	0	0	0	0
1.915	835.606	0	0	0	0	0	0	0	0	0	0	0	0	0	0	0	0	0	0	0	0	0	0	0	0	0	0	0	0	0	0	0	0	0	0.1	0	0	0	0	0	0	0.1302	0	0	0	0	0	0	0
3.0838	835.591	0	0	0	0	0	0	0	0.2353	0.3654	0.393	0.3122	0.2928	0.1241	0.2708	0.2439	0.266	0.2405	0.239	0.3309	0.0133	0.2339	0.2483	0.2261	0.1742	0.1342	0.3389	0.1889	0.1072	0	0.1119	0.012	0.0098	0.1624	0	0	0	0.1384	0.191	0.3335	0.1475	0.275	0.2669	0.2596	0.4726	0.3513	0.1994	0.4604	0
0.5687	835.18	0	0	0	0	0	0	0	0	0	0	0	0	0	0	0	0	0	0	0	0	0	0	0	0	0	0	0	0.0241	0	0	0.0491	0	0.0547	0	0	0	0	0	0	0	0	0	0	0	0	0	0	0
1.0217	395.199	0	0	0	0	0	0	0	0.6107	0	0.3627	0	0.4528	0	0.2115	0.3247	0.2001	0.3983	0	0	0	0	0	0.4422	0	0	0.2697	0	0	0	0	0	0.1396	0	0	0.2648	0.1637	0.3545	0.3531	0.2091	0	0	0.2853	0	0.8129	0	0	0	0.3336
0.6094	395.195	0	0	0	0	0	0	0	0	0	0	0	0	0	0	0	0	0	0	0	0	0	0	0	0	0	0	0	0	0	0	0	0	0	0	0	0	0	0.2646	0	0	0	0	0	0	0	0.1425	0	0
1.1775	395.161	0	0	0	0	0	0	0	0	0	0	0	0	0	0	0	0	0.1719	0.2616	0.1839	0.1362	0	0	0	0	0	0.5168	0.1549	0.0375	0	0	0	0.3516	0	0.2983	0.4627	0	0	0.3174	0	0	0.3705	0	0	0	0	0	0	0
1.6598	395.159	0	0	0	0	0	0	0	0	0	0	0	0	0	0	0	0	0.1455	0	0	0	0	0	0	0	0	0	0	0.0879	0	0	0	0	0	0	0	0	0	0	0.1858	0	0	0	0	0	0	0	0	0
1.5785	395.114	0	0	0	0	0	0	0	0	0	0	0	0	0	0	0	0	0	0	0	0	0	0	0	0	0	0	0.2949	0	0.3227	0	0	0	0	0	0	0	0	0	0	0.0303	0	0	0	0	0	0	0	0
1.0084	395.114	0	0	0	0	0	0	0	0	0	0	0	0	0	0	0.1708	0	0	0	0	0	0	0	0	0	0	0	0	0	0.1232	0	0	0	0	0	0	0	0	0	0	0.1416	0	0	0	0	0	0	0	0
1.8074	395.112	0	0	0	0	0	0	0	0	0	0	0	0	0	0	0	0	0	0	0	0	0.3491	0	0	1.2191	0	0	1.6255	0	3.6877	0	0	0	0	0	0	0.3547	0	0	0	3.2787	0	0	0	0	0	0	0	0
0.4523	395.082	0	0	0	0	0	0	0	0	0	0	0	0	0	0	0.1276	0	0	0	0	0.1328	0	0	0	0	0	0.1313	0	0	0	0.0549	0	0	0	0	0	0	0	0	0	0.0722	0	0	0	0	0	0	0	0
2.0668	395.043	0	0	0	0	0	0	0	0	0	0	0	0	0	0	0.0752	0	0.1181	0	0	0	0	0	0.1031	0	0	0.1489	0.1143	0	0	0	0	0.0702	0.1192	0.1949	0	0	0.2297	0.1508	0	0	0	0	0	0.2696	0	0	0	0
3.0344	394.969	0	0	0	0	0	0	0	0	0.0115	0	0	0	0	0	0	0	0	0	0.067	0.0703	0	0	0.0708	0.064	0	0.0797	0	0.0961	0	0.0177	0.1039	0.0745	0.0314	0.0249	0.0379	0.0548	0.0331	0.0215	0	0	0.0181	0	0	0	0	0	0	0.007
2.1521	394.207	0	0	0	0	0	0	0	0	0	0	0	0	0	0	0.274	0.1749	0.1242	0.112	0.1499	0.1073	0	0.333	0	0.1878	0.2088	0.2572	0.1788	0.1045	0.1271	0.1727	0	0.1491	0.2293	0.1534	0.1825	0.0634	0.2015	0	0.1446	0	0	0	0	0	0	0	0	0
1.1754	394.165	0	0	0	0	0	0	0	0	0	0	0	0	0	0	0	0	0	0	0.2	0.1265	0.089	0	0	0.0504	0.1382	0.2998	0	0.0667	0	0.0909	0	0	0	0	0	0.2296	0.2997	0.128	0	0	0.2238	0	0	0	0	0	0	0
0.4364	394.131	0	0	0	0	0	0	0	0	0	0	0	0	0	0.3123	0.1595	0	0	0	0	0.1303	0	0	0.0866	0	0.0888	0	0	0.09	0	0	0	0	0	0.5759	0.3235	0	0	0	0	0.0678	0	0	0	0	0	0	0	0
1.0669	393.299	0	0	0	0	0	0	0	0	0.2478	0.2321	0.6264	0.2898	0	0.7627	0	0.3501	0	0.3491	0.0715	0	0.314	0.1345	0	0	0	0	0	0	0.2854	0.245	0	0	0	0.6086	0.413	0	0.2625	0.5583	0	0	0.4486	0	0	0	0.2503	0	0	0.4585
2.8176	393.297	0	0	0	0	0	0	0	0.0869	0	0	0	0	0.3401	0	0.1244	0.3344	0.0133	0	0	0	0.2962	0.4698	0.0695	0	0	0	0.2186	0.0151	0	0	0	0	0	0.008	0	0	0	0	0	0	0.0437	0	0	0.4797	0.1733	0	0.1509	0
1.231	393.297	0	0	0	0	0	0	0	0	0	0	0	0	0	0	0	0	0	0	0	0	0	0	0.2737	0.0537	0	0	0	0	0	0	0	0	0	0	0	0	0	0.14	0	0	0	0	0	0.2498	0	0	0.284	0.6984
2.7657	244.155	0	0	1.0527	0	0	0	0.0318	18.2606	18.6948	18.6877	19.0841	19.0353	19.5563	41.7569	21.2879	29.6387	17.1174	28.7713	41.5325	16.8355	13.886	51.0865	25.7855	24.627	31.3337	27.7799	11.5508	21.6403	31.6926	23.672	26.2558	18.0486	28.6523	46.5661	18.0737	22.3299	38.5088	33.7434	29.7595	17.5188	22.8116	6.075	13.0684	10.1675	25.1769	26.8591	7.6697	8.1831
3.517	244.141	0	0	0	0	0	0	0.7293	0.0779	0	0	0	0	0	0	0	0	0	0.0024	0.263	0	0	0.0459	0	0.1039	0.1495	0	0	0.0585	0	0.1608	0.0148	0	0	0.1939	0	0	0	0	0	0	0.1047	0	0.0152	0	0	0	0	0
0.7942	244.131	0	0	0	0	0	0	0	0	0	0	0	0	0	0.7441	0	0	0	0	0	0	0	0	0.3961	0.1173	0	0	0	0.3105	0	0.6617	0.0471	0	0.2334	0.3841	0.1509	0	0	0	0	0	0	0	0	0	0	0	0	0
3.3553	244.129	4.0907	0.6711	4.3458	0	0	1.2261	0	0	0	0	0.0049	0	0	0	0.0231	0	0	0	0	0	0	0	0.0095	0.0572	0	0	0.1771	0	0	0	0	0	0.0052	0	0	0.0801	0	0.2432	0	0	0.0604	0	0	0	0.1076	0	0	0
1.9082	244.082	0	0	0	0	0	0	0	0	0	0	0	0	0	0	0	0.1216	0	0	0	0.1343	0	0	0	0	0	0.1806	0	0	0	0	0	0	0	0.1678	0	0	0	0	0	0	0	0	0	0	0	0	0	0
0.9774	244.081	0	0	0	0	0	0	0	0.2693	0.2779	0.185	0.1928	0	0.2148	0.7077	0	0	0.4235	0.2326	0.5525	0.4641	0.2393	0.4812	0.1476	0.3205	0.314	0.3633	0.1396	0.2954	0.1382	0.2845	0.3808	0.131	0.5447	1.4412	0.1683	0.1991	0	0	0.1507	0	0.3291	0	0.5929	0	0.1738	0.5069	0	0
2.1453	244.08	0	0	0	0	0	0	0	0	0.1936	0.1386	0.3576	0	0.1957	0	0.4557	0.185	0	0.5284	0	0.5577	0	0	0.0783	0	0.198	0.7664	0	0	0.1905	0	0.2686	0.38	0.2319	0.3095	0.0731	0	0	0.152	0.2125	0	0.1915	0	0	0	0.0234	0	0	0
2.9912	244.08	0	5.0753	0	0	0	0	0	0.1984	0.1376	0.1546	0.1713	0	0	0	0	0	0	0	0	0	0	0	0	0	0.0725	0	0	0	0	0	0	0	0	0	0	0.2248	0.3103	0	0	0.0463	0	0	0.074	0	0	0.2884	0	0.0865
1.7575	244.08	0	0	0	0	0	0	0	0.5984	0.5524	0.5573	0.5275	0.6074	0.5967	0.6167	0.9203	0	0.4349	0.5414	0.9235	0.2186	0	0.6894	0.6903	0.3455	0.7614	0.6885	0.608	0.4511	0.4348	0.562	0.4059	0.4362	0.7789	0.7682	0.5624	0.3885	0.7921	0.4174	0.9059	0.2176	0.6799	0.4269	0.2636	0.455	0.5975	0.9148	0	0.4628
2.4728	244.079	0	0	0	0	0	0	0	6.4794	5.5705	5.291	4.7513	4.9083	4.4587	1.6732	4.9827	6.3819	3.4508	3.7914	6.2537	3.7166	3.303	4.3846	3.4924	2.662	6.3013	4.8688	3.2337	3.0949	1.2153	4.1451	2.3099	4.3369	1.6046	4.3385	4.3622	3.8548	1.3304	6.2356	4.4761	1.9167	5.1272	4.8576	3.4535	6.4931	5.6483	4.6369	4.7461	4.8965
2.6743	244.079	1.4702	0	0.8182	0	0	0	0	0.0501	0	0	0	0	0	0	0	0	0	0	0	0	0	0	0	0.0234	0	0	0	0	1.3439	0	0	1.5614	0.7699	0	0	0	0	0	0	0	0.6207	0	0	0	0	0	0	0
0.5932	244.077	0	0	0	0	0	0	0	0	0	0	0	0	0	0.4231	0	0.3872	0.1598	0	0	0	0	0	0	0	0	0	0.1355	0.4954	0	0	0	0	0	0	0	0	0	0	0	0	0	0	0.214	0	0	0	0	0
1.1731	244.066	0	0	0	0	0	0	0	0	0	0	0	0	0	0	0	0	0	0	0.2498	0	0	0	0	0	0	0	0.0748	0	0	0	0	0	0	0	0	0	0	0	0	0	0	0.8648	0	0	0	0	0	0
0.5338	244.031	0	0	0	0	0	0	0	0.1938	0	0.188	0.1743	0.1925	0.2202	0.6155	0.7899	0.1969	0.0721	0.1591	0.1493	0.4332	0.147	0.6617	0.2814	0.2282	0.229	0.3972	0.7072	0.436	0.0803	0.1767	0.1874	0.1562	0	3.9034	0	0.0807	0.1516	0	0.1438	0	0	0.1522	0	0	0.2447	0	0.2127	0
3.4754	244.014	0.0768	0	0	0	0	0	0	0	0.0954	0.0491	0	0	0	0	0.0331	0	0	0	0	0.0211	0	0.0284	0	0.2899	0.2041	0.1243	0.053	0	0	0	0	0.0734	0	0	0	0	0	0	0.3902	0	0	0.0269	0.0533	0	0	0	0	0
0.4992	243.205	0	0	0	0	0	0	0	0	0	0	0	0	0	0	0	0	0	0	0	0	0	0.322	0	0	0	0	0	0	0	0	0	0	0	0	0	0	0	0	0	0	0	0	0	0	0	0	0	0
2.4989	94.0653	0	0	0	0	0	0	0	3.676	3.5574	3.3404	3.6231	3.2893	3.1977	7.2702	4.7989	5.8483	2.9407	0	4.0352	5.9874	1.0906	6.0327	3.3308	3.5793	2.2705	4.3311	1.2563	3.7238	3.7819	3.2278	2.6642	5.5056	3.9022	7.0029	3.44	2.5775	1.2413	4.6395	3.6178	1.4148	5.2039	1.5539	1.5731	2.2138	3.2005	4.4655	2.0424	1.3009
0.8182	94.0604	0	0	0	0	0	0	0	0	0	0	0	0	0	0	0	0	0	0	0	0	0	0	0	0.0795	0.3642	0	0	0	0	0	0	0.3628	0	0	0	0	0.3397	0.4859	0	0.1606	0	0	0	0	0	0	0	0
1.2017	94.0405	0	0	0	0	0	0	0	0.3747	0.1448	0.3302	0.3278	0.1297	0.119	0.4364	0.595	0.5672	0.4165	0.3975	0.7191	0.1445	0.1252	0.1779	0.2481	0.1676	0.5446	0.2176	0.3089	0.3868	0.1648	0.3068	0.2396	0.4565	0.4666	0.5107	0.1847	0.2907	0.4466	0.5052	0.3239	0.1725	0.3952	0.3114	0.3625	0	0.3939	0.2214	0.2477	0
3.101	93.3687	0	0	0	0	0	0	0.3201	0	0	0	0	0	0	0	0	0	0	0	0	0.0638	0	0.0063	0.02	0	0	0	0	0.0255	0	0.0434	0.0252	0	0	0	0.0426	0.0757	0	0	0	0	0.0754	0.0699	0	0	0	0	0	0
3.1057	93.2041	0	0	0	0.1254	0	0.0385	0	0	0	0	0	0.0245	0	0	0	0	0	0	0	0.0718	0	0	0	0	0	0.0827	0	0	0	0	0	0	0	0	0.1504	0.0984	0	0	0	0.0163	0.1358	0	0	0	0	0	0	0
3.1064	93.1338	0	0	0	0	0	0	0	0.0051	0	0	0	0	0	0	0	0	0	0	0	0.061	0	0	0	0	0	0	0	0.0501	0	0	0	0.0626	0	0	0.0592	0.0707	0	0	0	0	0	0.0517	0	0	0	0	0.0304	0
1.738	93.0698	0	0	0	0	0	0	0	0	0.1295	0	0	0.5904	0.6309	0	0.0639	0.6318	0.0667	0.2804	0.6509	0	0.4931	0.6511	0.5268	0.0693	0	0.0833	0.2953	0.5812	0.1297	0	0.3578	0	0.2991	0	0.6569	0	0	0.8003	0.1975	0	0.0525	0.5866	0	0.9053	0	0	0	1.1281
2.8187	93.0694	0	7.9093	0	0	0	0.0466	3.9759	0	0	0.0651	0	0.1673	0	0	0	0	0.1212	0.0053	0	0.7505	0.3856	0	0.2564	0.5871	0	0	0	0.4823	0	0	0.0754	0	0	0.3624	0	0	0	0.4683	0.0479	0.0187	0.3307	0	0	0.0638	0	0	0	0
2.5873	93.0689	0	0	0	0	0	0	0	0	0	0	0	0	0	0	0	0.105	0	0	0	0	0	0	0	0	0	0	0	0	0	0	0	0	0	0	0	0	0	0	0	0	0	0	0	0	0	0	0	0
3.2946	93.0686	0	0	0	0	0	3.1115	0	0	0	0	0	0	0	0	0	0	0	0	0	0.0955	0	0	0	0	0.2672	0	0	0	0	0	0	0	0	0	0	0	0.0772	0	0	0.1942	0	0	0	0	0	0	0	0
1.5605	93.0676	0	0	0	0	0	0	0	0.3746	0	0	0.3685	0.738	0.464	0.1521	0	0	0	0.1882	0	0	0	0	0.3942	0.401	0.5734	0	0.2103	0.0657	0	0.2441	0.0755	0	0.4141	0	0	0	0.4307	0	0.1975	0	0	0	0	0	0.8035	0	0	0
1.2401	93.0476	0	0	0	0	0	0	0	0.5486	0.4592	0.3935	0.4318	0.4359	0.3945	0.4844	0.5386	0.3668	0.3521	0.4509	0.582	0.3318	0.2093	0.8672	0.5865	0.3754	0.7615	0.5345	0.3987	0.2853	0.3092	0.4146	0.254	0.2633	0.4173	0.4543	0.5029	0.3474	0.6979	0.3757	0.9571	0.458	0.3482	0.3841	0.4337	0.3533	0.5015	0.5601	0.2275	0.2595
3.0916	93.0456	0	0	0	0	0	0	0	0	0	0	0	0.0258	0.0344	0.0187	0.0613	0.1122	0	0	0.0798	0.083	0.1026	0.047	0.0449	0	0.0413	0.11	0	0	0	0.0619	0	0	0.0766	0	0.017	0	0	0.0541	0	0	0	0	0	0	0.0148	0	0	0
0.7424	93.0454	0	0	0	0	0	0	0	0.4679	0.4145	0.4463	0.4524	0.4144	0.4326	0.5463	0	0	0	0.1084	0	0.0953	0	0.1327	0	0.1221	0.2239	0.3676	0.3039	0.092	0.9973	0.33	0.478	0.416	0.5266	1.8745	1.1437	0.6515	0.3108	0.3623	0.677	0.237	0.403	0	0	0	0	0	0	0
0.532	93.0461	0	0	0	0	0	0	0	1.2628	1.1657	1.0174	1.1249	0.9706	1.0097	1.1817	1.2877	1.6367	1.0202	1.1214	0.8952	0.8852	1.1024	0.3698	0.6994	0.4173	0.9695	1.1182	0.788	1.3919	0.9996	1.1302	1.1382	1.0344	1.0761	0.8187	1.0741	1.2243	0.1312	0.7374	0.7099	1.4563	0.9433	1.65	2.6239	0.6519	0.881	1.0997	1.3716	0.5448
2.0681	93.0381	0	0	0	0	0	0	0	0.7439	0.7423	0.7932	0.5347	0.778	0.6841	1.3224	0.5877	0.7696	0.2759	0.2571	0.5116	0.7732	0.3825	1.028	2.388	0.9999	0.746	0.6509	0.2375	1.8972	1.276	2.4708	1.4395	0.209	0.3341	0.7439	1.5149	3.6328	0.479	0.7236	0.6908	0.3446	0.7842	0.3591	0.5188	0.6439	0.4503	0.3589	0	0.2982
0.5149	852.557	0	0	0	0	0	0	0	0	0	0	0	0	0	0	0	0	0	0	0	0	0	0	0	0	0	0	0	0	0	0	0	0.0615	0	0	0	0	0	0.2529	0	0	0	0	0	0	0	0	0	0
0.5662	852.204	0	0	0	0	0	0	0	0	0	0	0	0	0	0	0	0	0	0.0675	0	0.0477	0.0749	0	0	0	0	0	0	0.2949	0	0.1074	0.2176	0	0.3694	0	0	0.1362	0	0	0	0	0	0	0	0	0	0	0	0
0.4313	851.183	0	0	0	0	0	0	0	0	0	0	0	0	0	0	0.0838	0	0	0	0	0	0	0	0	0	0	0	0.0473	0	0	0	0	0	0	0	0	0	0	0	0	0	0	0	0	0	0	0	0	0
0.4439	850.781	0	0	0	0	0	0	0	0.2973	0	0	0	0	0	0.4911	0	0	0	0	0.4017	0	0	0	0	0	0	0	0	0	0	0	0	0	0	0	0	0	0	0	0	0	0	0	0	0	0	0	0	0
0.4765	850.602	0	0	0	0	0	0	0	0	0	0	0	0	0	0	0	0	0	0	0	0	0	0	0	0	0	0	0	0	0	0	0	0.0878	0	0	0	0	0	0.1661	0	0	0	0	0	0	0	0	0	0
0.4469	848.628	0	0	0	0	0	0	0	0	0.1025	0	0.1862	0	0	0	0	0	0	0	0	0.1022	0	0	0	0	0	0	0.1112	0	0	0	0.0563	0.4127	0	0.1035	0.0827	0	0	0.2984	0	0	0	0.1512	0	0.175	0	0	0	0
3.1023	846.882	0	0	0	0	0.3834	0	0	0.0523	0.0161	0	0.0109	0	0	0	0	0	0	0	0	0	0.0129	0	0.523	0.2083	0	0	0.0451	0.1334	0.022	0	0.0651	0	0	0	0	0	0	0.0707	0.1588	0.0525	0	0	0	0	0	0	0	0.0988
3.0843	846.596	0	0	0	0	1.142	0	0	0	0.2085	0.1648	0	0	0.0968	0	0.0169	0.1174	0.0337	0.1844	0	0	0	0	0.1266	0	0.0921	0.2125	0	0	0	0.0169	0	0	0	0	0	0	0	0	0	0	0	0.1494	0	0	0	0.2246	0	0
0.5467	845.519	0	0	0	0	0	0	0	0	0	0	0	0	0	0	0.0629	0.1322	0.0874	0.0996	0	0	0	0	0	0	0	0	0	0	0	0.1075	0.1402	0.0588	0	0	0.0795	0.119	0	0	0	0.1464	0	0	0.337	0	0	0	0	0
0.5469	845.186	0	0	0	0	0	0	0	0	0	0	0	0	0	0	0.0718	0.1961	0.0628	0.0587	0	0	0	0	0	0	0	0	0	0.1813	0.0774	0.068	0.153	0.0751	0.0915	0	0.1189	0.1075	0	0	0	0.2015	0	0	0.1442	0	0	0	0	0
0.5454	844.851	0	0	0	0	0	0	0	0	0	0	0	0	0	0	0	0.1029	0	0.082	0	0.049	0.0537	0	0	0	0	0	0	0.0512	0.0534	0.05	0	0.0627	0.0575	0	0	0	0	0	0	0.188	0	0.1092	0.2515	0	0	0	0	0
3.0895	844.59	0	0	0	0	0	0	0	0.0374	0.3575	0.1728	0.0774	0.2023	0.0142	0.3507	0.1423	0	0.0937	0.1628	0	0.1467	0	0.1127	0.1801	0	0.2076	0	0.18	0.1047	0.1077	0.2006	0	0.1019	0.1389	0.0843	0.1009	0	0.2725	0	0.0959	0	0.0181	0.2498	0.1084	0.3974	0.1442	0.211	0.0152	0
3.0725	843.571	1.9823	0	1.1069	0	0	1.0332	0	0	0	0	0.1032	0	0	0.134	0	0.0931	0	0	0	0	0	0	0	0	0	0	0	0	0.0091	0	0	0	0	0	0	0	0	0	0.0393	0	0	0	0	0	0	0.1573	0.1257	0.0375
0.4159	842.69	0	0	0	0	0	0	0	0	0	0	0	0	0	0	0	0	0	0	0	0	0	0.0827	0	0	0	0	0	0	0	0	0	0	0	0	0	0	0	0	0	0	0.1924	0	0	0	0	0	0	0
0.5371	841.708	0	0	0	0	0	0	0	0	0	0	0	0	0	0	0	0	0.0851	0	0	0.0596	0	0	0	0.0858	0	0	0	0	0	0	0	0	0	0	0	0	0	0	0	0	0	0	0	0	0	0	0	0
0.7905	841.519	0	0	0	0	0	0	0	0	0	0	0	0	0	0	0	0	0	0.3818	0	0	0.3307	0	0	0	0	0	0	0.0635	0	0.1061	0	0	0	0.205	0	0	0	0	0	0	0	0	0	0	0	0	0	0
1.241	397.183	0	38.0885	0	0	0	0	0	0	0.1783	0	0.3412	0	0	0	0	0.3116	0	0	0	0	0	0	0	0	0.044	0.0739	0	0	0	0	0	0.1142	0	0	0	0	0.4565	0	0	0	0.0723	0.143	0	0.2785	0.137	0	0	0.1427
2.8182	397.182	0.0862	14.9402	0	3.7669	0	0	0	0	0.4231	0	0.0161	0	0	0	0.0315	0.1817	0	0	0	0	0.056	0	0	0	0	0.0837	0	0	0	0.2703	0	0.1557	0	0.5679	0.3229	0	0.2358	0.058	0	0	0	0.6866	0	0.987	0	0.7034	0	0.1272
3.2813	397.163	7.1349	0	0	0	0	0	0	0	0	0.8927	0	0.3608	0.4859	0	0.7356	0.8219	0.209	0.0768	0	0.0525	0.0208	0.8589	0.5604	0.5265	0.3704	0.9338	0.1777	0.0326	0	0.0757	0.1155	0.6774	0.5444	0	0	0.5545	0	0.2139	0	0.1135	0.6471	0	0	0	0	0	0	0
3.0985	397.162	0	0	0	0.0321	0	0	0	0.1883	0.7807	0.2752	0.136	0.2032	0.165	0.497	0.1056	0.1938	0.0786	0	0.6228	0.28	0.2255	0.1895	0.2926	0.5111	1.0191	0.3489	0	0	0.1814	0.1805	0	0.1601	0.031	0	0.1951	0.0029	0.2428	0.144	0.2138	0.0506	0.188	0.1339	0.2805	0.2004	0.2814	0.2935	0.3042	0.2206
2.0175	397.132	0	0	0	0	0	0	0	0	0	0	0	0	0	0	0	0	0	0	0	0	0	0	0	0.3434	0	0	0.9245	0	1.8043	0	0	0	0	0	0	0.3622	0	0	0	0.459	0	0	0	0	0	0	0	0
2.7496	397.13	0	0	1.141	1.0215	0	0	0	0	0	0	0	0	0	0	0	0	0	0	0	0	0	0	0	0.36	0	0	0	0	0.2745	0	0	0	0	0	0	0	0.0651	0	0	0	0.0023	0	0	0	0.0464	0	0	0
2.4172	397.129	0	0	0	0	0	0	0	0	0	0	0	0	0	0	0	0	0	0	0	0	0	0	0	0.0662	0	0	0.2393	0	0	0	0	0	0	0	0	0	0	0	0	0.1513	0	0	0	0	0	0	0	0
0.4376	397.073	0	0	0	0	0	0	0	0	0	0	0	0	0	0	0	0	0	0	0	0.0459	0.049	0	0	0	0	0	0	0	0	0.0514	0	0	0	0	0	0	0	0	0	0	0	0	0	0	0	0	0	0
2.5326	396.168	0	0	0	0	0	0	0	0	0	0	0	0	0.2582	0.4879	0	0	0	0	0	0	0	0	0	0.1242	0	0	0	0.4714	0.2576	0	0	0	0	0	0	0	0	0	0	0	0	0	0	0	0	0	0	0
0.7145	396.114	0	0	0	0	0	0	0	0	0	0	0	0	0	0	0.3322	0.275	0	0.097	0	0.2194	0	0.3505	0	0.1908	0	0	0.0739	0	0	0	0	0	0	0	0	0	0.0541	0	0	0	0	0	0	0	0	0	0	0
0.4945	396.111	0	0	0	0	0	0	0	0	0	0	0	0	0	0.1467	0.061	0	0	0	0	0.4818	0	0	0.3525	0.0903	0	0	0	0.0613	0	0	0	0	0	0.4812	0.1417	0	1.0271	0	0.1408	0.1085	0	0	0	0	0	0	0	0
2.8126	396.067	0	0	0.042	0.1767	0	0	0	0	0.0837	0.0934	0	0	0.0825	0.095	0	0	0	0	0.096	0.0996	0	0	0.0464	0	0.1701	0	0	0	0.0561	0.1186	0.0475	0.1461	0	0	0	0	0.1575	0.1435	0.1071	0.0515	0.0634	0.0262	0	0.0291	0.1884	0	0.0868	0
0.5767	395.239	0	0	0	0	0	0	0	0	0	0	0	0	0	0	0	0	0	0	0.2738	0	0	0.3931	0	0	0	0	0.2256	0	0	0	0	0	0	0.3875	0	0	0.153	0	0	0	0	0	0	0	0	0	0	0
0.8276	395.248	0	0	0	0	0	0	0	0.5159	0.4383	0.4561	0.435	0.4476	0.4602	0.9728	0.3109	0.2403	0.1269	0.8568	0.6754	0.2286	0.3916	0.6813	2.1966	0.5763	0.3514	0.2739	0.6697	0.509	0.2037	1.2645	0.3687	0.1481	0.4338	0.3927	0.3895	0.2801	1.3787	1.0385	0.6566	0.7464	0.5285	0	0.6035	0	0.4432	0.9741	0	0.6616
2.6989	395.208	0	0	0	3.6165	0	0	0	0	0	0	0	0	0	0.0014	0.0056	0	0	0	0.0009	0	0	0	0	0	0	0	0.0353	0	0	0	0	0	0	0	0.001	0	0	0	0	0	0	0.0139	0	0	0	0	0	0
2.1643	395.205	0	0	0	0	0	0	0	0	0	0	0	0	0	0.1113	0.1406	0	0	0.1487	0	0	0	0	0	0	0	0	0	0	0	0	0	0	0	0	0.2765	0	0	0	0	0	0	0	0	0	0.1441	0	0	0
1.9807	245.15	0	0	0	0	0	0	0	2.9486	2.8772	3.1939	3.157	3.0416	2.9166	5.6671	5.1747	3.2963	2.3799	2.7252	6.5707	1.8514	0.6441	8.3014	2.886	2.332	1.7714	1.5675	2.0249	4.3434	2.8362	2.5432	1.032	9.9521	3.5565	4.1008	2.5928	4.6259	3.6672	8.0339	6.3814	2.6018	3.8076	3.5464	2.6652	1.1203	3.0041	3.5576	1.1277	0
0.6202	245.134	0	0	0	0	0	0	0	0	0	0	0	0	0	0.4328	0.2109	0.3382	0	0.3349	0.6395	0	0.3846	1.0024	0.4235	0.4835	0	0.6407	0.2768	0.1486	0.1425	0.1828	0.1888	0.5262	0.3422	0.3987	0.2294	0.2052	0.8796	0.3885	0.4359	0.2195	0	0.5392	0	0.4644	0	0	0	0
3.0861	245.115	0	0	0	3.3364	0	0	0	17.5018	16.5923	16.0328	16.3164	16.0988	13.1949	16.4524	13.1479	15.0517	11.2194	7.3095	10.2914	12.55	8.3661	9.1893	13.3034	0	8.1502	16.394	8.7693	7.5275	9.8107	13.2007	9.2616	7.2456	7.9213	14.2655	12.4473	10.3527	15.4577	9.6025	11.9969	7.3504	19.6245	13.1013	16.0029	25.5482	17.79	16.4127	20.7746	19.4872
0.9726	245.097	0	0	0	0	0	0	0	1.9297	1.9341	1.7285	1.5165	1.6802	1.7626	1.201	1.593	1.8367	1.9003	1.486	2.3381	1.203	1.2099	4.1086	1.8855	1.8594	3.2378	4.026	1.6282	2.4043	1.418	1.2438	1.223	1.4344	2.852	3.1075	1.7031	1.9417	4.0663	2.3338	4.5115	0.8272	1.4657	0.9223	1.4791	1.6935	1.7501	1.3863	0.6018	1.9819
1.5211	245.094	0	0	0	0	0	0	0	0	0.2139	0	0	0.2165	0	0	0	0	0.4144	0	0.1701	0.1819	0	0.334	0	0	0.1867	0.1805	0.251	0.1958	0.3838	0	0.3132	0.3348	0.1884	0	0.4421	0.2207	0.5495	0	0.1845	0.2873	0	0	0	0	0	0	0	0
2.6509	245.093	0	1.9512	0	0	0	0	1.349	0	0	1.4055	1.5417	0	0	0	1.2914	0	1.3235	0	1.9178	0	1.2472	1.8849	2.7875	0	0	1.867	0	0.8018	2.788	3.861	1.7412	1.3619	0.9972	1.2009	1.345	0.1265	3.3444	2.6166	2.0676	3.7243	1.4153	0.5995	0.4295	1.3887	0.7889	0	0.3681	0.7178
3.5088	245.085	0	0	0	0.9144	0	0	2.67	0.2796	0	0	0	0	0	0	0	0	0	0	0	0.0932	0	0	0	0.1864	0	0	0	0	0.1574	0	0	0.0752	0.0681	0	0	0	0.3604	0	0	0	0	0	0	0	0	0	0	0.0154
1.9085	245.083	0	0	0	0	0	0	0	0	0	0	0	0	0	0	0.2729	0	0	0	0.1826	0.0138	0	0	0	0	0	0.3477	0	0	0	0.1523	0	0	0	0	0	0	0	0	0	0	0	0	0	0	0	0.2569	0	0
1.7462	245.082	0	0	0	0	0	0	0	0	0	0	0	0	0	0.1738	0	0	0	0	0.1832	0.642	0	0	0	0	0	0	0	0.085	0	0.3284	0	0	0	0	0	0	0	0	0	0	0	0	0	0	0	0.1637	0	0
1.2421	245.082	0	0	0	0	0	0	0	0.867	0.84	0.7292	0.7845	0.8558	0.7318	0.7273	0.9852	0.5836	0.3943	0.1758	1.2403	0.5681	0.7111	1.1393	1.3032	1.2017	0.3595	1.8108	1.6213	0.8113	0.6776	0.6326	0.5601	0.9722	0.6462	0.3859	0.2004	1.2887	0.7583	0.4382	1.3038	1.1819	0.5716	0	0	0	0.1964	1.0739	0.2882	0.4887
2.4669	245.077	0	0	0	0	0	0	0	3.4119	3.5337	3.3898	3.4835	3.3768	3.3874	4.4221	3.7019	2.9141	3.127	2.7779	4.4839	2.9164	2.1118	3.7006	3.1902	2.9109	4.6365	4.4091	3.9019	2.5719	2.7569	3.2973	2.4159	3.3539	3.5805	4.6485	3.1653	2.6948	5.8286	3.6548	4.4931	1.9587	4.1383	0	0	3.7049	3.0882	4.9155	0	2.8299
0.5042	245.05	0	0	0	0	0	0	0	0	0	0	0	0	0	0	0	0	0	0	0	0	0	0	0	0.1129	0	0	0.1442	0	0	0	0	0	0	0	0	0	0	0	0.0983	0	0	0	0	0	0	0	0	0
1.9288	245.037	0	0	0	0	0	0	0	0	0	0	0	0	0	0	0	0	0.1769	0	0	0	0	0	0	0	0	0	0	0	0	0	0	0	0	0	0	0.1383	0	0	0	0	0	0	0	0	0	0	0	0
0.4632	244.226	0	0	0	0	0	0	0	0.1049	0.1265	0	0	0.1245	0.0986	0	0	0	0	0	0	0	0	0	0	0	0	0	0	0	0	0	0	0	0	0	0	0	0	0	0	0	0.1603	0	0	0	0	0	0	0
0.4888	244.191	0	0	0	0	0	0	0	0.3229	0	0	0	0	0	0	0	0	0	0	0	0	0	0	0	0	0	0	0	0	0	0	0	0	0	0	0	0	0	0	0.3671	0	0	0	0	0	0.1785	0	0	0
2.9761	244.154	0	0	0	0	0.0288	0	0	0	0	0.1456	0	0	0	0	0	0	0.3061	0	0	0	0.2663	0	0	0	0	0	0	0	0	0	0	0.0992	0	0	0.2667	0.2724	0	0	0	0	0	0	0	0	0	0	0	0
1.6402	95.0855	0	0	0	0	0	0	0	0	0	0	0	0.42	0	0.3423	0	0	0	0	0.134	0	0	0.0787	0	0	0.4805	0	0	0.063	0	0	0.0368	0.0515	0.09	0	0	0	0	0.3782	0	0	0.1569	0.194	0	0	0.6265	0	0	1.3386
2.8043	95.0849	0	3.8831	0	0	0	0	0	0.0335	0.1169	0	0	0.0267	0	0	0.1001	0	0.3222	0	0	0	0.7529	0	0	0	0.1318	0.3767	0	0	0	0	0	0	0	0.0714	0	0.6114	0.1399	0.215	0	0	0	0	0	0	0	0	0	0
1.8414	95.0767	0	0	0	0	0	0	0	0	0	0	0	0	0	0	0	0	0	0	0	0	0	0.3576	0.3265	0	0.3267	0	0	0.0486	0	0	0	0	0	0	0	0	0.2913	0.083	0	0	0	0	0	0	0	0	0	0
2.1151	95.0751	0	0	0	0	0	0	0	0.3283	0.0845	0.1633	0	0	0.4829	0	0	0	0.2535	0	0	0	0	0	0	0	0	0	0.4008	0.4383	0	0.3111	0.9975	0	0.2521	0.7181	0	0	0.1942	0	0	0.0727	0.2231	0	0	0	0	0.6146	0	0
0.8524	95.0691	0	0	0	0	0	0	0	0	0	0	0	0	0	0	0.0974	0	0	0	0	0	0	0.7043	0	0.148	0.1936	0	0	0.0695	0	0.1168	0.3183	0.2613	0	0	0.1231	0.2085	0.0207	0	0	0.0725	0	0	0	0	0	0	0	0
1.092	95.0624	0	0	0	0	0	0	0	0.2859	0.3121	0.2943	0.31	0.2424	0.2869	2.1393	0.2602	0	0.2082	0	0.2869	0.4514	0	2.6414	0	0	0.3239	0.4354	0.1632	0.2616	0.2075	0	0.1083	0	0.0715	0.2787	0.5494	0.3563	0.498	0	0.2205	0	0.2893	0	0	0.5721	0	0.3221	0.5717	0.2206
2.337	95.0611	0	0	0	0	0	0	0	0.3422	0	0.4581	0.3159	0.4575	0.4438	0	1.1046	0	0.5717	0.1965	0	0.4032	0	0	0	0	0.323	0.5185	0.2124	0.3608	0	0.5203	0.2238	0.4139	0.6068	1.1531	0	0	0.4364	0	0	0.0693	0.3836	0.6295	0	0.6752	0.2496	0	0.2823	0
1.3198	95.0609	0	0	0	0	0	0	0	0.3863	0.4113	0.3518	0.3567	0	0.328	1.0556	0	0.7134	0.3425	0.4229	0.728	0.7323	0.352	1.244	0	0.221	0.6935	0.4435	0	0.5414	0	0.412	0.2949	0	0.3281	0	0.7895	0.6819	0.4995	0.5619	0.2885	0	0.5375	0.4058	0.3913	0.3215	0	0.4891	0.4833	0.2327
2.0436	95.0487	0	0	0	0	0	0	0	0	0	0	0	0	0	0	0	0	0	0	0	0	0	0	0	0	0	0.3951	0.2051	0	0	0	0	0	0	0	0	0	0	0	0	0	0.4433	0	0	0	0	0	0	0
1.5922	95.0137	0	0	0	0	0	0	0	0.2569	0.2462	0.2554	0	0.2376	0	0	0	0	0	0	0	0.1728	0.1564	0.281	0.6262	0.3157	0.3349	0.2523	0.1587	0.1855	0	0.6362	0	0	0.1976	0.2271	0.2622	0.2788	0.6589	0.2305	0.3415	0.2089	0	0	0	0	0.3085	0	0	0
3.0332	94.9308	0.0643	0	0	0	0	0	0	0.1439	0	0	0	0	0	0.1673	0	0	0	0	0	0	0	0.1754	0.0737	0.1212	0	0.2218	0.0437	0.1371	0.1491	0.0571	0	0.1791	0.193	0.1709	0	0.161	0	0	0	0	0.0921	0	0	0	0	0	0	0
2.6634	94.0663	0	0	0	0	0	0	0	0	0	0	0	0	0	0	0	0	0	0	0	0.2708	0	0	0	0	0	0	0	0	0	0	0	0.199	0	0	0	0	0	0	0	0	0	0	0.0052	0	0	0	0.0326	0
1.0708	94.066	0	0	0	0	0	0	0	0	0	0	0	0	0	0	0	0	0	0	0	0	0	0	0	0.1953	0	0	0	0	0	0	0	0	0	0	0	0.3047	0	0	0	0	0	0	0	0	0	0	0	0
2.2644	94.0657	0	0	0	0	0	0	0	0	0	0	0	0	0	0	0.1581	0	0.1232	0	0	0	0.2109	0	0	0.5846	0	0	0	0.2317	0.1415	0	0.152	0	0.1409	0	0.527	0.4366	0	0	0	0.1413	0	0	0	0	0	0	0	0
1.4642	94.0655	0	0	0	0	0	0	0	2.4328	2.3535	2.1189	2.449	2.3648	2.3758	7.7874	0.824	0.5431	0	0	0	3.1993	0	3.357	4.4166	2.6578	0	0.5079	0	3.4967	0.6377	12.4193	4.065	0.4688	6.197	8.9516	3.721	2.9491	0	0.3892	0	0	2.8647	0.3384	0	0	0.1611	0	1.6193	0
1.9388	94.0653	0	0	0	0	0	0	0	0	0	0	0	0	0	0	0	0	0	0	0	0	0	0.4532	0	0	0	0	0	0.3082	0	0	0	0	0	0	0	0	0	0	0	0.1055	0	0	0	0	0	0	0	0
0.5052	861.631	0	0	0	0	0	0	0	0	0	0	0	0	0	0	0	0.1195	0.1133	0	0	0	0	0	0	0	0	0	0	0.0929	0	0	0	0	0	0	0	0	0	0	0	0	0	0	0	0	0	0	0	0
3.0816	861.585	0	0	1.8615	0	0	0.0486	0	0.0654	0	0.1059	0	0	0	0.1201	0.1682	0	0.096	0.1401	0.1466	0	0.1605	0	0.0837	0.0745	0.2171	0.1593	0	0.0234	0.0459	0	0	0	0.1161	0	0.1009	0	0.1484	0	0.1339	0	0.1361	0	0	0.2629	0.1283	0	0	0.2172
0.4707	860.659	0	0	0	0	0	0	0	0	0	0	0	0	0	0	0	0	0	0	0	0	0.1676	0	0	0	0	0.1779	0	0	0	0	0	0	0	0	0	0	0	0	0	0	0	0	0	0	0	0	0	0
2.0727	857.729	0	0	0	0	0	0	0	0	0	0	0	0	0	0	0	0	0	0	0	0	0.1544	0	0	0	0	0	0	0	0	0	0	0	0	0	0	0	0.1771	0	0	0	0	0	0	0	0	0	0	0
2.0605	857.066	0	0	0	0	0	0	0	0	0	0.12	0	0	0	0	0	0	0.1237	0.0841	0	0	0	0	0	0	0	0	0	0	0	0	0	0	0.1015	0	0.1175	0	0	0	0	0	0	0.1554	0	0	0.1559	0	0	0.2436
3.0847	856.572	0	1.7065	0	0.311	0	0	0	0.1075	0	0.1435	0	0	0.166	0	0	0	0	0	0	0.0104	0.0104	0.0477	0.1248	0.0722	0.0532	0.0188	0	0	0	0	0	0	0	0	0	0	0.0123	0	0	0	0	0.0153	0.1636	0.2271	0	0	0.1503	0.2258
2.0733	856.402	0	0	0	0	0	0	0	0	0	0	0	0	0	0	0	0.2286	0.0473	0.0811	0.2087	0	0.1724	0	0.1096	0	0.1673	0.0454	0	0.0384	0	0.0921	0	0	0	0.2732	0.1374	0	0.2595	0.1819	0	0	0.1803	0	0	0.276	0	0	0	0
2.0664	855.735	0	0	0	0	0	0	0	0	0	0	0	0	0	0	0	0.1526	0.2384	0	0	0.176	0.117	0.1947	0	0	0	0	0.1482	0	0	0.1152	0	0.1138	0.1578	0.2877	0.1633	0	0.1251	0.2148	0	0	0.2236	0	0	0	0	0	0.216	0.3572
3.0867	855.57	0.0669	0	2.3283	0	0.7429	0	0	0.0986	0	0.0825	0.225	0	0	0.114	0.0723	0	0.1565	0.155	0	0.1919	0.1277	0.1084	0.1498	0.0804	0.1971	0.1758	0.1306	0	0.0968	0	0	0	0	0.1942	0.0164	0	0	0.0986	0.1325	0	0.1515	0.1698	0.1505	0	0.2122	0	0	0.1758
0.7253	855.542	0	0	0	0	0	0	0	0	0	0	0	0	0	0	0	0	0	0	0	0	0	0	0	0	0	0	0	0	0	0	0	0	0	0	0	0.1413	0	0	0	0	0	0	0	0	0	0	0.1998	0
0.5027	855.14	0	0	0	0	0	0	0	0	0	0	0	0	0	0	0	0	0	0	0	0	0	0	0	0	0	0	0	0.2605	0.0349	0	0	0	0	0	0	0	0	0	0	0	0	0	0	0	0	0	0	0
2.0656	855.071	0	0	0	0	0	0	0	0	0	0	0	0	0.1747	0.201	0.1477	0	0.1881	0	0.1955	0	0.2022	0	0.1318	0	0.248	0.1514	0.0964	0.0779	0	0	0	0.0748	0	0.1195	0.0668	0.0526	0.1176	0.1886	0.1126	0	0.2398	0	0	0.255	0.1839	0	0	0.2021
3.0112	854.557	0	0	0	0	0	0	0	0.2979	0.3006	0.1252	0.1873	0.1195	0.1458	0.2987	0.1103	0.253	0.1256	0	0	0.1138	0	0	0.1337	0	0.133	0.1445	0.079	0.1129	0	0	0	0.1047	0.0711	0.1609	0	0.1861	0.2599	0.1446	0.3981	0.0873	0.2387	0.3029	0	0	0.2508	0.2278	0	0
2.0664	854.405	0	0	0	0	0	0	0	0	0	0	0	0.1335	0	0	0.1363	0.1464	0.1038	0.1331	0.0943	0	0.1027	0	0.0749	0	0.1142	0.0929	0.1099	0	0	0	0	0.0749	0.1036	0.218	0.078	0	0.1852	0.1909	0	0	0.1778	0.1405	0	0.1427	0	0	0	0.1781
2.0808	853.739	0	0	0	0	0	0	0	0	0	0	0	0	0	0	0.0762	0	0	0	0	0	0.1051	0	0	0	0	0	0	0	0	0	0	0	0	0	0	0	0	0	0	0	0	0	0	0	0	0	0	0
0.5038	853.118	0	0	0	0	0	0	0	0	0	0	0	0	0	0	0.0467	0.1499	0.2189	0	0	0	0	0	0	0	0	0	0	0.1408	0.0364	0	0	0	0	0	0	0	0	0	0	0	0	0	0	0	0	0	0	0
2.6972	398.206	0	37.545	0	0	0	16.9216	0	0	0.419	0.1763	0.0822	0	0	1.0682	0	0	0.036	0.0143	0.4619	0.3826	0.5605	0	0	0	0	0	0	0	0	0.2813	0	0	0.2112	0	0.1704	0	0	0.1729	0	0	0.1695	0	0.0362	0.1485	0.4429	0	0.0642	0.4998
1.6222	398.196	0	0	0	0	0	0	0	0	0.2595	0	0.1532	0	0	0	0	0	0	0	0	0	0.3511	0	0	1.1166	0	0	0.7666	0	1.3044	0	0	0	0	0	0	0.3256	0	0	0	2.0007	0	0	0	0	0	0	0	0
0.6761	398.15	0	0	0	0	0	0	0	0.2138	0	0.2051	0	0	0	0	0.1987	0.2208	0	0.1283	0.2244	0.1392	0	0.2025	0.1306	0.1834	0.0896	0.1308	0.1945	0.2077	0.1305	0.2112	0.1262	0.1384	0.1485	0.0592	0.4104	0.3267	0	0.3113	0.1946	0	0	0	0	0	0	0	0	0
2.8082	398.13	0	0.5794	0	1.0908	0	0	0	0	0	0.3331	0.2724	0	0.3335	0.8082	0.9537	0.5112	0.2201	0.3019	0.9408	0.6261	0.0062	0.4371	0.1113	2.3541	1.6202	3.6485	0.4769	0.4278	1.1789	1.8811	2.1551	1.0402	0.6268	0.9019	1.6517	0.2504	0.6676	0.7121	0.4518	0.3416	0.1066	0	0	0	0	0.6854	0	0
0.4672	398.127	0	0	0	0	0	0	0	0.1369	0.1107	0.1209	0	0	0	0.7928	0.3724	0	0.1407	0.1079	0	0.2084	0	0	0.2455	0.3109	0.096	0	0	0.0714	0.0581	0	0.0499	0	0	1.5106	0.1652	0	0	0	0.2344	0.2146	0.8799	0	0	0	0	0	0	0
0.4189	398.064	0	0	0	0	0	0	0	0	0	0	0	0	0	0.1076	0	0	0	0	0	0	0	0	0	0	0	0	0	0	0	0	0	0	0	0.0921	0	0	0	0	0	0.0474	0.0971	0	0	0	0	0	0	0
3.1591	398.029	0	0	0	2.4427	0	0	0.2638	0.0514	0.0319	0.0174	0	0	0	0.0161	0.1562	0	2.3082	0	0	0	0	0	0	0.0147	0	0	0	0.2031	0	0	0	0	0	0	0	0	0	0	0	0	0	0	0	0	0	0	0	0
0.9386	397.328	0	0	0	0	0	0	0	0.2442	0	0.3803	0.2141	0.4161	0	0.7192	0.5744	0.6686	0.3776	0	0	0.491	0.6398	0.2822	0	0.153	0.4183	0.4317	0	0.1096	0.4066	0	0	0.5921	0.2432	0	0	0	0	0	0	0	0.5667	0	0	0	0	0	1.0087	0
0.6279	397.238	0	0	0	0	0	0	0	0.095	0.3377	0	0	0	0	0	0	0	0	0.4946	0	0	0	0.1932	0.139	0.2107	0.1182	0	0.4396	0	0.1381	0.1535	0.1194	0	0.1257	0	0	0	0	0	0.2064	0	0	0	0	0	0.1578	0	0	0
0.4621	397.232	0	0	0	0	0	0	0	0	0	0	0	0	0	0	0	0	0	0	0	0	0	0	0	0.1231	0	0	0	0	0	0	0.0825	0.1279	0	0	0	0.1243	0	0.1055	0	0	0	0.3394	0.1055	0	0	0	0.3953	0
0.7731	397.192	0	0	0	0	0	0	0	0	0.161	0	0.6513	0	0.272	0.3425	0.2566	0.5	0	0	0	0.501	0	0	0	0	0	0	0.0619	0	0	0	0	0.022	0	0	0	0	0	0.2833	0	0	0	0	0.4631	0	0	0	0	0.4105
0.2597	397.189	0	0	0	0	0	36.4771	0	0	0	0	0	0	0.2924	0	0	0	0	0	0	0.0928	0	0	0	0	0	0	0	0	0	0	0.0222	0	0	0	0	0	0	0	0	0	0.1231	0	0	0	0	0	0	0
1.0227	397.187	0	0	0	0	0	0	0	0.4137	0.1749	0.6373	0.4026	0.3238	0	0.1079	0.303	0.7381	0.2751	0	0.1422	0.7505	0.7988	0.0298	0.503	0.3166	0	0.892	0.1512	0.1153	0.4702	0.4923	0.0141	0.5994	0.1587	0.1837	0.6002	0.5586	0.3348	0.1472	0.2935	0	0	0.0875	0.4051	0.5091	0.3198	0.3146	0	0.7291
0.4961	397.185	0	0	0	0	0	0	0	0	0	0	0	0	0	0	0	0	0	0	0	0	0	0	0	0	0	0	0	0	0	0	0	0	0	0	0	0	0	0.1906	0	0	0	0	0	0	0	0.3148	0	0
2.1549	397.184	0	0	0	0	0	0	0	0.157	0	0	0	0	0	0	0	0	0	0	0	0	0	0	0	0	0	0	0	0	0	0	0	0	0	0	0	0	0	0	0.1388	0	0	0	0	0	0	0	0	0
1.8494	397.183	0	36.436	0	0	0	0	0	0.4319	0.2149	0.3495	0	0.3063	0	0	0	0	0	0	0	0	0	0	0.1143	0	0	0	0.0745	0	0	0	0	0	0	0	0	0	0	0	0	0	0	0	0.5247	0.3182	0.1965	0	0.2776	0
3.4282	246.107	1.6521	0.628	0	0.7652	0	0	0	0	0.6285	0.6001	0.5816	0	0.5577	0	0	0	0.3823	0.3295	2.3915	0.144	0.2319	0	0.3471	0.0272	1.7715	0.8562	1.6184	0.5097	0.2786	1.3036	0.3833	0	0.3965	0	0.173	0.3747	2.4167	0.5902	0.6962	0.303	0.7218	0	0.3953	0	0.168	0	0	0.1584
2.9777	246.095	0	0.092	0	0	0.6786	3.377	0	0.5207	0.5799	0.4289	0.4834	0.3642	0	0.5259	0.6745	0	0	0	1.0316	0.4907	0.341	0.8056	0.7506	0.5669	0.9095	1.0257	0.5222	0.6457	0.7385	0.6467	0.4214	0.4785	0.4819	0.5168	0.3545	0.4466	0.911	0	0.3537	0.2508	0.3867	0.2948	0	0	0.3308	0.6542	0.262	0
1.3675	246.095	0	0	0	0	0	0	0	0	0	0	0	0	0	0	0	0	0.0865	0	0	0	0	0	0	0	0	0.5192	0	0.2889	0	0	0	0.3203	0.3063	0	0	0	0	0	0	0	0	0	0	0	0	0	0	0
1.6361	246.071	0	0	0	0	0	0	0	0	0	0	0	0	0	0	0.2191	0	0.6042	0	0	0	0	0	0	0	0	0	0	0.0345	0	0	0.3201	0	0	0	0	0.0444	0	0	0	0	0	0	0	0	0	0	0	0
0.6248	246.067	0	0	0	0	0	0	0	0	0	0	0	0	0	0	0	0.1101	0.1719	0	0	0	0	0	0	0	0	0.186	0	0	0	0	0	0	0	0	0	0	0	0	0	0.1177	0	0	0	0.2708	0	0	0	0
0.9825	246.048	0	0	0	0	0	0	0	0	0	0	0	0	0.1141	0.3873	0	0	0.3416	0	0	0.1739	0	0	0	0	0	0.1793	0	0.3039	0.1599	0	0.377	0	0	0	0	0	0	0	0.2058	0.0749	0	0	0	0.2866	0	0	0	0.22
1.2503	246.046	0	0	0	0	0	0	0	0	0	0	0	0	0	0	0	0	0	0	0	0	0	0	0	0	0	0	0	0	0	0	0	0	0	0	0	0	1.5703	0	0	0	0	0	0	0.1639	0.1313	0	0	0
2.1396	245.226	0	0	0	0	0	0	0	0.0365	0	0.1628	0.3857	0	0.3143	0.3444	0	0	0	0	0	0	0	0.3513	0	0	0.0414	0	0	0	0	0	0	0	0	0	0	0	0	0	0	0.136	0	0	0	0	0	0	0	0
1.8129	245.226	0	0	0	0	0	0	0	0	0	0.5707	0	0	0	0	0	0.3866	0.3145	0	0	0	0	0.2288	0	0	0	0	0	0	0	0	0	0	0	0	0	0	0	0	0	0.0815	0	0	0	0	0.4338	0	0	0
1.639	245.225	0	0	0	0	0	0	0	0	0	0.1386	0	0	0.4219	0	0	0	0	0	0	0	0	0	0	0	0.3471	0	0	0	0	0	0	0	0	0.2712	0	0	0	0	0.4813	0	0	0	0	0.5628	0.5265	0	0	0.6197
0.4677	245.225	0	0	0	0	0	0	0	0.1112	0.5077	0	0	0	0	0	0	0	0	0.2258	0.4448	0	0.6029	0	0	0.0484	0	0	0	0	0	0	0	0	0.2015	0.3676	0.5623	0	0.668	0.3187	0.5193	0	0.4823	0	0	0.8618	0.4395	0.6453	0.3755	0.2751
0.6764	245.225	0	0	0	0	0	0	0	0	0	0.4814	0.189	0	0.5373	0	0	0	0	0.3643	0	0	0	0	0	0	0	0.1214	0	0	0	0	0.1123	0	0	0	0	0	0	0.4892	0.1029	0	0	0.5625	0.1385	0	0.5135	0.1763	0	0.5783
1.1715	245.224	0	0	0	0	0	0	0	0.2364	0.399	0.2899	0.4104	0	0	0	0	0	0	0.1512	0	0	0	0	0	0	0	0	0	0	0	0	0	0	0	0	0	0	0.5959	0	0	0	0	0.586	0.6001	0.6043	0	0	0.5697	0
0.8501	245.223	0	0	0	0	0	0	0	0	0	0.3342	0	0	0	0	0	0	0	0	0	0	0	0	0	0	0	0	0	0.0664	0	0	0	0	0	0	0	0	0	0.1608	0	0.066	0	0	0	0	0	0	0	0
2.33	245.186	0	0	0	0	0	0	0	0	0	0	0	0	0	0	0	0	0	0	0	0	0	0	0	0.2163	0	0	0	0	0	0	0	0	0	0	0	0	0	0	0	0	0	0.7536	0	0	0	0	0	0
1.4812	245.184	0	0	0	0	0	0	0	0.2461	0.2497	0.2431	0.1354	0	0	0.3388	0.1847	0.2127	0.3594	0.158	0.4449	0.2361	0	0.1409	0	0.1083	0.1789	0	0.1965	0.31	0.2577	0.0949	0	0.2372	0.2383	0.1293	0.1294	0	0.3743	0.1535	0	0	0.2298	0	0	0	0	0	0	0
1.2501	97.0396	0	0	0	0	0	0	0	0	0	0	0	0	0	0	0	0	0	0	0	0	0	0.1105	0	0	0	0	0	0	0	0	0	0	0	0	0	0	0	0	0.1309	0	0	0	0	0	0	0	0	0
3.2744	97.0289	0	0	0	0	0	0	0.3495	0	0	0.2075	0	0	0	0.1714	0	0	0.1887	0	0.3851	0	0	0.2541	0	0	0.3172	0.2089	0.7725	0.0852	0	0	0	0	0	0	0.1117	0	1.3037	0	0	0.2175	0	0.0406	0	0	0	0	0	0
3.1271	96.9923	0	0	0	0	0	0	0	0.2739	0.091	0.0367	0.1242	0.7648	1.3456	0.0207	0.4129	0.3029	0.8337	0	0.2785	0.5208	0.2602	0.0319	0.4802	0	0.6092	0.0327	0.5171	0.0887	0.1229	0.9501	0.3504	0.2196	0	0.5415	0.3977	0.0408	1.0676	0.5051	0.481	0.0485	0.3709	0.3926	1.3047	0.4428	0.045	1.4378	1.8568	1.0615
1.3595	96.0807	0	0	0	0	0	0	0	1.3573	1.2332	1.1603	1.4284	1.378	1.5403	0.3316	2.3833	0.6891	0.6295	0.6312	3.0568	0.1963	0.3234	2.5281	0.376	0.4546	1.0568	3.1891	0.2314	0.2952	3.6487	0.5448	0.5198	3.1627	0.3581	0.6188	0.5193	2.8843	0.8178	1.2217	0.3886	1.3785	0.5275	2.7442	0.8359	1.0806	1.0223	3.4633	0	0.4596
0.9675	96.0791	0	0	0	0	0	0	0	0	0	0	0	0	0	0	0.1678	0	0	0.162	0	0	0	0	0	0	0	0	0	0	0	0	0	0	0	0.1949	0	0	0	0	0	0	0	0	0	0	0	0	0	0
3.4802	96.0784	0	0	3.9684	0	0.1085	0	0	0.4784	0.5038	0.4857	0.4856	0	0.3909	0	0.397	0.2965	0	0.4121	0	0	0.0774	0	0.6154	0.6836	1.2117	0.359	0.4438	0	0.4509	0.3572	0	0.394	0.1162	0.2989	0	0	0	0	0.4997	0	0.2143	0.124	0.2768	0	0.5017	0	0	0
1.5816	96.0755	0	0	0	0	0	0	0	0	0	0	0	0	0	0	0.5457	0.1752	0	0.555	0.0605	0	0	0	0	0	0.5807	0.2726	0.132	0	0.2525	0	0	0	0	0.3535	0	0.1321	0	0	0	0	0	0	0	0	0	0	0	0
2.6923	96.0739	0	0	0	0	0	0	0	0	0	0	0	0	0	0	0.4588	0	0	0	0	0	0	0	0	0	0	0	0	0.0207	0.1565	0	0.0006	0	0	0	0	0.0003	0	0	0	0	0	0	0	0	0	0	0	0.0037
2.0465	96.0542	0	0	0	0	0	0	0	0	0	0	0	0	0	0.2988	0	0	0	0	0	0	0	0	0	0.1104	0	0	0	0.1255	0.0878	0.1992	0.1119	0	0	0	0	0.238	0	0	0	0	0	0	0	0	0	0	0	0
1.7528	96.047	0	0	0	0	0	0	0	0	0	0	0	0	0	0	0	0	0	0	0	0	0	0	0	0	0	0	0	0.1202	0	0	0	0	0	0	0	0	0	0	0.1278	0	0	0	0	0	0	0	0	0
0.8199	96.0451	0	0	0	0	0	0	0	0	0	0	0	0	0	0.2523	0.3136	0	0.095	0.1089	0	0.4517	0	0.313	0	0	0	0	0	0.1101	0.0837	0.3648	0.1173	0.2357	0.1933	0	0.1272	0.1988	0.2066	0.2771	0.2076	0	0.2662	0	0	0	0	0	0	0
2.3537	96.0448	0	0	0	0	0	0	0	1.1063	1.2649	1.4643	1.5152	1.5706	1.2283	1.4844	1.5644	1.6868	2.1015	1.0514	0	1.4336	2.3162	0	0	0.9854	1.3585	0.2849	1.0567	3.235	2.249	1.9478	2.4409	2.3111	2.2029	0	2.332	2.4994	0.6797	2.1651	0.5181	1.8233	0.9257	0.9453	1.6432	0	1.4015	0.5342	1.352	1.2934
0.4984	96.0448	0	0	0	0	0	0	0	0.2548	0.1949	0.2075	0.2853	0.1942	0.2117	0.6913	0.739	0.2339	0.241	0	0	0.1678	0.1931	0.2201	0.7758	0.2104	0	0.1064	0.1044	0.4406	0.223	0.6843	0.1984	0.1192	0.3442	0.593	0.3988	0.5031	0	0	0	0.1541	0.3907	0.3121	0	0	0	0	0	0
1.1767	96.0447	0	0	0	0	0	0	0	0.5422	0.2904	0	0	0	0.4021	0.6948	0.4685	0.469	0.5786	0.3846	0	0.4538	0.4022	0.2596	0.2497	0.3739	0.131	0	0.091	0.4383	0.2646	0.3929	0.1352	0.2618	0.4015	0	0.2971	0	0	0.2568	0.2209	0.2028	0	0	0	0	0	0	0	0
0.4573	95.0857	0	0	0	0	0	0	0	0	0.4455	0.3952	0	0.4383	0.7046	0.5182	0.2227	0.5118	0.2412	0.5721	0.9323	0.2478	0.8907	0.7213	0.4414	0.3238	0.516	0.8715	0	0	0.2097	0.3765	0.4458	0.9363	0.3178	0.9627	0.8378	0.0611	0.7693	0.5039	0.5523	0	0.422	0.3082	0	1.0721	0.644	1.1986	1.1638	0.7965
0.6707	95.0855	0	0	0	0	0	0	0	0	0.4844	0.6689	0	0.7946	0.5721	0.4639	0	0.4142	0	0.279	0	0	0.4599	0.4973	0.5961	0.3859	0.5073	0.1431	0.1639	0	0.33	0.2715	0.3639	0	0.0224	0.4824	0	0	0	0.4609	0.5494	0	0.5312	0.6866	0	0.8031	0.68	0	0.9288	0
3.0862	870.562	0	0	0	0	0.8249	0	0	0	0.1664	0	0	0.1893	0.1407	0.1831	0.1235	0.1757	0.1028	0	0.055	0.0883	0	0.0333	0.1647	0	0.1622	0	0.0514	0	0.028	0	0	0.1284	0.1131	0	0.0215	0	0	0.0989	0.1475	0.0397	0	0.1761	0.116	0.442	0.0855	0	0.061	0.1578
0.5051	870.143	0	0	0	0	0	0	0	0	0	0	0	0	0	0	0.088	0.3653	0.4133	0	0	0	0	0	0	0	0	0	0.0975	0.3977	0.0453	0	0	0	0	0	0	0	0	0	0	0	0	0	0	0	0	0	0	0
2.0634	870.077	0	0	0	0	0	0	0	0	0	0	0	0	0.1358	0.1763	0.0935	0.1415	0.091	0.0954	0.126	0	0.1034	0	0.1054	0	0.2271	0.1123	0	0	0	0	0.0732	0	0.1226	0.156	0.0784	0.0758	0.2168	0.0965	0	0	0	0.142	0	0.2419	0	0	0	0.1811
0.5425	869.662	0	0	0	0	0	0	0	0	0	0.1539	0	0.0798	0	0	0	0	0	0	0	0	0	0	0	0	0	0	0	0	0	0	0	0	0.1051	0	0	0	0	0	0	0	0	0	0	0	0	0	0	0
0.845	869.591	0	0	0	0	0	0	0	0	0	0	0	0	0	0	0	0	0	0	0	0	0	0	0	0	0	0	0.1016	0	0	0	0.0401	0	0	0	0	0	0	0	0.1361	0	0	0	0	0	0	0	0	0
1.0163	869.501	0	0	0	0	0	0	0	0.3655	0.5435	0.5549	1.133	0.8712	1.2818	0	0.2934	0.3072	0.337	0.1332	0	0.1572	0.3875	0	0	0.108	0.2399	0	0	0.3382	0.2327	0	0.3151	0.364	0.2662	0	0.4834	0.4914	0	0.5614	0	0.713	0.3291	1.6921	1.9083	0	0.3832	0	0.7298	0.5845
0.5455	869.168	0	0	0	0	0	0	0	0.1793	0.1882	0.1638	0.1573	0.1343	0.1802	0.2017	0.2828	0.3433	0.1742	0.2393	0	0.0502	0.1593	0	0	0	0.1604	0	0.1414	0.3638	0.2516	0.238	0.27	0.2632	0.2098	0	0.2425	0.2895	0	0.1204	0	0.3476	0	0.2784	0.7185	0	0	0	0	0
3.0689	868.648	0	0	0	0	0	0	0	0	0	0	0.1423	0	0.1103	0.0783	0.0986	0.0565	0	0	0	0	0	0.4366	0	0	0	0.1073	0.1451	0.1077	0.1501	0.1475	0.1752	0	0.1588	0.2196	0	0.0698	0.2048	0	0.0662	0	0	0	0	0	0.1325	0.1041	0	0
3.0877	868.551	0	0	0	0.5986	0	0	0	0.0831	0.2131	0	0.0866	0.2932	0.0538	0.0832	0.1466	0	0.1472	0.1238	0	0	0.1153	0	0	0	0	0.2449	0	0.0342	0.006	0.0556	0	0	0.1698	0.1371	0	0	0.0805	0	0.065	0	0.1824	0.2806	0	0.2682	0.1204	0.1277	0.2887	0.3332
1.7626	865.567	0	0	0	0	0	0	0	0	0	0	0	0	0	0	0	0	0	0	0	0	0	0	0	0	0	0	0	0	0	0	0	0	0	0	0	0	0	0	0	0	0.1356	0	0	0	0	0	0	0
0.4691	864.622	0	0	0	0	0	0	0	0	0	0	0	0	0	0	0	0	0	0	0	0	0	0	0	0	0	0	0.0568	0	0	0	0	0.2351	0	0	0.0758	0	0	0.2598	0	0	0	0	0	0	0	0	0	0
3.0895	864.593	0	2.5367	0	0	0	0	0	0	0	0.432	0	0.5446	0	0.2376	0.0154	0	0	0.0798	0	0	0.2355	0.5676	0.0868	0	0.3725	0	0.3627	0.0818	0	0	0	0.1511	0	0.2756	0.2548	0	0.4744	0	0	0	0	0	0.137	0.4596	0	0	0.6168	0
0.8133	864.495	0	0	0	0	0	0	0	0	0	0	0	0	0	0	0	0	0	0	0	0	0	0	0	0	0	0	0	0	0	0	0	0	0	0	0	0	0	0.1166	0	0.0509	0	0	0	0	0	0	0	0
0.791	863.535	0	0	0	0	0	0	0	0	0	0	0	0	0	0	0	0	0	0.2681	0	0	0.1794	0	0	0	0	0	0	0	0	0	0	0	0	0.1471	0	0	0	0	0	0	0	0	0	0	0	0	0	0
0.4546	862.642	0	0	0	0	0	0	0	0	0	0	0	0	0	0	0	0	0	0	0	0	0	0	0	0	0	0	0	0	0	0	0	0.2132	0	0	0	0	0	0.0694	0	0	0	0	0	0	0	0	0	0
3.0881	862.595	0	0	0	0	1.5061	0	0	0.9825	1.1121	0.7186	1.0043	0.9141	0.4378	0.3143	0.3982	0.754	0.2669	0.2003	0.4539	0.1852	0.4822	0.6503	0.6205	0.3322	0.6807	0.8656	0.3406	0.0972	0.1157	0.3758	0.212	0.2303	0.7129	0.3478	0.5665	0.4756	0.6986	0.5868	0.8476	0.4659	0.9879	0.2838	0.7331	0.9196	0.4976	0.5684	1.0188	0.944
3.2756	399.081	0	0	0	0	0	0	0	0	0	0	0	0	0	0	0	0.1103	0	0	0.3192	0.051	0	0.0295	0.1977	0.199	0	0	0	0.3495	0	0	0.0509	0	0	0	0.1234	0.1792	0	0	0	0	0	0	0	0	0	0	0	0.0366
1.6141	398.288	0	0	0	0	0	0	0	0	0	0	0	0	0	0	0	0	0	0	0	0	0	0	0.1975	0	0	0	0	0	0	0	0	0	0.1405	0	0	0	0	0	0	0	0	0	0	0	0	0	0	0
0.493	398.274	0	0	0	0	0	0	0	0	0	0	0	0	0	0	0	0	0	0	0	0	0	0	0	0	0	0	0	0	0	0	0	0.0788	0	0	0	0	0	0.3497	0	0	0	0	0	0	0	0	0	0
2.0113	398.253	0	0	0	0	0	0	0	0	0	0	0	0	0	0	0.1757	0	0	0	0.0865	0	0	0.1423	0.4273	0	0.2083	0	0	0	0	0.3308	0.1517	0.1172	0	0	0	0.2098	0.1583	0	0.2178	0	0	0	0	0	0	0	0	0
2.372	398.252	0	0	0	0	0	0	0	0.6942	0.597	1.4663	1.5635	0.6206	1.4596	0.6377	5.3815	0.6667	0	0.1925	0	0.434	0	0	0.938	0.6029	0.6839	0	0.7453	2.2126	0.8392	1.1968	0	3.4507	2.5444	0.8999	1.0218	2.5052	0.4847	1.9406	3.436	0.6341	0.7261	1.502	1.0934	0.4339	1.3319	1.4665	0	0
2.3509	398.223	0	0	0	29.7061	0	0	0	0	0.5166	1.2464	0.123	1.5378	0	0	0.2305	0.2637	0.2777	0.1468	0	0.1666	0	0	0.0837	0.5163	0.4145	0.3858	0	0	0	0.0797	0.1878	0	0.1462	0.1969	0.3807	0	0.3736	0	0	0.3558	0.4025	1.1498	0	0.7792	0.1644	0	0.1549	0.411
1.2538	398.216	0	0	0	0	0	0	0	0.0769	0.0791	0.2983	0.6657	0	0.1663	0	0	0	0	0	0.1844	0.1011	0.0161	0	0.3102	0.2154	0	0.8868	0	0.08	0	0.2342	0.1083	0	0	0	0	0	0.2346	0.2092	0.1934	0	0.1136	0.4064	0.48	0.9175	0.2476	0	1.0997	0
0.6432	398.215	0	0	0	0	0	49.2507	0	0.2465	0	0.4819	0	0.4275	0	0.3703	0.0618	0	0	0	0	0	0.0852	0	0	0	0	0	0	0	0	0	0.1139	0	0.4251	0.3571	0.0732	0	0	0	0	0.0561	0	0	0.6008	0.5152	0.2872	0.3283	0.7745	0.9632
0.8287	398.213	72.9118	0	0	0	0	0	0	0.498	0.7853	1.0446	0	0.7062	1.322	1.3866	0.7215	1.5252	0.4279	0.8635	1.3329	1.0249	1.4217	0.5203	0.6067	0.0161	0.663	0.1237	0.1577	0.0411	0.3564	1.0023	0.7318	1.3836	0.509	1.4876	0.9868	0.2455	0	1.3804	0.8911	0.0249	1.9037	0.9329	1.0699	0	1.1971	0.7342	1.082	0.9924
3.4837	398.213	0	37.7568	0	31.6443	0	0	0.1417	0	0	0	0	0	0	0	0	0	0	0	0	0	0	0	0	0.0872	0	0	0	0	0	0	0	0	0	0	0	0	0	0	0	0	0	0	0.1867	0	0	0	0	0
2.8518	398.212	0	51.0255	0	0	51.335	0	0.2086	0	0.7411	0.288	0	0.44	0	0.0194	0.0853	0	0.1319	0.0602	0.5512	0	0	0	0	0	0	0	0.057	0.064	0	0	0	0	0	0.5319	0	0.072	0	0.5652	0.1553	0	0	0.9691	0	0.207	0.1147	0	0.0052	0.7242
1.078	398.212	0	0	0	28.0405	0	0	0	0.1161	0.2359	0.1526	0.296	0.6837	0.0661	0.3263	0.1321	0.1049	0.0644	0.5593	0.4726	0.2989	0.6349	0.8106	0.2005	0.3023	0.6673	0.2955	0.033	0.1089	0.0209	0.3545	0.0802	0.0316	0.2799	0.5483	0.0741	0.0982	1.2181	0.4944	0.6147	0.3543	0.1198	0.4491	0.3054	0.2256	0.9935	0.6403	0	1.6199
1.8094	398.212	103.961	0	0	0	0	0	0	0.251	0.3941	0.3662	0.2578	0.3584	0.1811	0.2099	0.2502	0.0901	0.1402	0.2497	0.2561	0	0.3606	0.296	0.0864	0	0	0.26	0	0	0	0	0	0.1651	0	0.3921	0	0	0	0.5027	0	0	0.062	1.3456	0	1.3421	0	0	0.7607	0.767
2.1114	398.211	88.9221	0	0	29.0029	0	0	0	0.1697	0	0.325	0.433	0	0	0.278	0.1451	0	0	0.1584	0	0	0	0.2001	0	0.0698	0.1473	0	0	0	0	0.2325	0.1469	0	0.1306	0	0	0.0771	0	0	0	0.0812	0.2984	0	0.1538	0.4627	0.0587	0.1779	0.0667	0
1.4479	398.21	58.8268	0	0	0	0	0	0	0	0	0	0	0	0	0	0	0.2554	0	0.0782	0	0	0.1689	0	0.3185	0.1972	0	0	0	0.0836	0	0	0.1054	0	0	0	0	0.1322	0	0	0.2262	0	0	0.635	0.4231	0	0	0	0.5617	0.2216
0.4322	398.21	0	0	0	0	46.7421	38.1691	0	0	0.2032	0	0	0.5005	0.2352	0	0.0331	0	0	0	0	0	0	0	0.2961	0	0	0	0	0.0419	0	0.0882	0	0	0	0.1513	0	0	0	0	0	0	0	0	0	0	0.4011	0	0.1932	0
0.6953	247.102	0	0	0	0	0	0	0	0	0.3162	0	0	0.2187	0	0.3508	0.518	0.2501	0.2048	0.1858	0	0.2619	0	0.1882	0	0.2009	0.1423	0	0.1325	0.0643	0.1753	0.459	0	0.0937	0.1207	0.1541	0.4794	0.2085	0	0	0.3122	0	0	0	0	0	0	0	0	0
0.4841	247.086	0	0	0	0	0	0	0	1.2876	0.8166	0.6026	0.6313	0.5668	0.703	0.7939	1.5973	0.8175	0.7446	0.9753	1.017	1.1823	0.8278	1.1978	0.8224	0.9936	0.82	1.342	0.6802	0.3312	0.4705	0.6546	0.4438	0.7963	0.5902	0.7325	0.1097	0.39	1.5262	0.6254	0.9363	0.4195	0.6377	0.4518	0.337	0.7576	0.3971	0.6922	0.7197	0.6154
2.628	247.056	0	3.0202	0	0.0721	0	1.1634	0	0	0	0	0	0	0	0	0	0.0075	0	1.2667	0	0	0.0456	0	0	0	0	0	0.9611	0	0	0	0	0	0	0	0	0	0	0	0	0	0	0	0	0	0	0	0	0
2.3448	247.052	0	0	0	0	0	0	0	0	0	0	0	0	0	0	0	0	0	0	0	0	0	0	0	0	0	0	0	0	0	0	0	0	0	0	0	0	0	0	0	0	0	0	1.3577	0	0	0	0	0
1.2075	247.051	0	0	0	0	0	0	0	0.472	0.0302	0	0	0	0.3481	0.4518	0.3665	0.4462	0.3062	0.0947	0	0.465	0.4524	0	0	0	0	0	0	0.3003	0	0.244	0.4594	0	0	0	0.2635	0	0	0.1588	0	0.1064	0	0	0	0	0.242	0	0	0.1917
3.4476	247.05	0	0	2.9836	1.498	0	0	0	2.0316	1.6987	1.2799	1.3188	1.2237	0.4254	0	0.466	0.9138	0.3622	0.6825	0.857	1.2802	0.6588	2.0005	1.0144	1.0612	0	0	0	0	0	0	0	0.475	0.4856	0	0.6151	0.6794	0.3074	1.2603	0	0	0.8245	1.0219	0	2.1538	0.8476	2.4341	2.1104	1.5403
0.9432	247.05	0	0	0	0	0	0	0	0.2914	2.1384	1.1613	1.5234	2.5295	1.89	0.9828	2.3494	2.5361	3.4371	1.3822	0.9701	0.8319	4.1754	0.657	0.3881	0.347	1.4751	0.3991	1.0335	3.3182	3.6276	1.1334	2.8886	5.6603	1.4817	0.6894	1.7712	3.9685	0.1731	2.3227	0.1902	2.4508	0.7067	1.5533	3.757	0.4091	1.6039	0.731	2.1273	1.9594
0.7089	246.985	0	0	0	0	0	0	0	0.1327	0.1267	0.1318	0	0	0.1438	0	0	0	0	0	0	0	0	0	0	0.5085	0.507	0.8908	0	0	0.2251	0.5753	0.4474	0.8444	0	0	0.3535	0	0.625	0.3932	0	0.2694	0	0	0	0	0	0	0	0
1.8344	246.205	0	0	0	0	0	0	0	0	0	0	0	0	0	0	0	0	0	0	0.3677	0	0	0.246	0	0.1401	0.2896	0	0	0	0	0	0	0	0	0	0	0	0	0	0	0	0	0	0	0	0	0	0	0
2.4292	246.171	0	0	0	0	0	0	0	149.546	145.811	141.584	151.75	146.919	151.17	137.665	55.6676	128.488	35.9721	104.669	91.7977	56.8633	79.8609	0	141.78	203.718	213.551	238.722	80.5722	181.337	130.41	103.288	258.192	174.05	178.633	139.716	207.543	0	337.576	200.988	310.093	159.249	72.8372	147.513	192.671	143.577	151.535	125.065	75.9768	103.874
2.6401	246.164	0	0	0	0	0	0	0	0.1171	0	0	1.1416	0	0	0.3658	0	0	0.0125	0.2278	0	0	0	0	0	0	0	0	0	0.2917	0	0	0	0	0	0	0	0	0	0	0	0	0.064	0	0	0	0	0	0	0
1.681	246.151	0	0	0	0	0	0	0	0	0	0	0	0	0	0	0.2457	0	0	0	0	0	0	0	0.1787	0.0501	0	0	0.1453	0	0	0	0	0.2571	0	0	0	0.1769	0	0.1336	0.2442	0.1278	0	0	0	0	0	0	0	0
0.4688	246.139	0	0	0	0	0	0	0	0	0	0	0	0	0	0.1199	0.1387	0	0.1428	0	0	0.1258	0	0	0.5112	0	0	0	0	0	0	0.6762	0	0	0	0.2912	0.1079	0	0	0	0	0	0.1969	0	0	0	0	0	0	0
1.0994	246.144	0	0	0	0	0	0	0	0	0	0	0	0	0	0	0	0	0	0	0	0	0	0.3671	0.7877	0.541	0	0.5851	0	0	0	0	0.158	0	0.107	0.1575	0.2605	0.1047	0.0925	0.7098	0.391	0	0	0	0	0	0	0	0	0
0.8077	246.123	0	0	0	0	0	0	0	0	0	0	0	0	0	0	0.1331	0.3476	0	0	0	0	0	0	0	0	0	0	0	0.0393	0	0.6693	0	0.2141	0	0	0	0	0.1687	0.0628	0	0	0	0	0	0	0	0	0	0
2.1638	246.108	0	0	0	0	0	0	0	3.7362	3.4359	3.1627	3.1997	2.8336	2.857	1.5169	9.2484	4.7028	7.0081	3.052	11.5019	3.2797	5.2889	3.3705	1.1468	1.539	8.3437	6.4971	11.3671	0.8318	2.9201	6.536	4.6518	2.2195	0.5349	1.3933	8.1237	7.0502	21.9063	5.7692	2.9619	3.2351	3.4406	2.3447	2.6287	4.0851	2.1943	6.05	0	2.7008
1.488	98.0532	0	0	0	0	0	0	0	0	0	0	0	0	0	0.2063	0.2973	0	0.1506	0	0	0.3052	0	0.1827	0.1271	0	0.2538	0.2426	0	0	0	0.1542	0	0.2556	0	0.1952	0	0	0.1489	0	0.201	0	0	0	0	0	0	0.2609	0	0
2.3887	98.035	0	0	0	0	0	0	0	0	0	0	0	0	0	0	0.2414	0	0	0	0	0	0	0	0	0	0	0	0	0	0	0	0	0	0	0.1719	0	0	0	0	0	0	0.1233	0	0	0	0	0	0	0
2.9052	97.1022	0	8.9929	0	1.4129	0	0	0	0	0.0379	0	0	0	0	0	0	0.096	0	0	0	0	0	0	0	0	0	0	0	0	0	0	0.0161	0	0.1887	0	0	0	0.0343	0	0	0.0514	0.7375	0.3556	0	0	0.7614	0	0	0
2.1132	97.1017	0	0	0	0	0	0	0	0	0	0	0	0	0	0	0	0.6113	0	0	0	0	0	0	0	0.1103	0	0	0	0.0508	0	0.2357	0	0	0	0	0	0	0.1466	0	0	0.138	0	0	0	0.1481	0.1596	0.4108	0	0
1.7702	97.1011	0	0	0	0	0	0	0	0.6924	0	0	0	0.6617	0	0.9041	0	0.8139	0.4098	0	0.5134	0	0.4886	0.8125	0.6948	0	0.23	0.5394	0	0	0.4821	0.2926	0.268	0.6104	0.5402	0.8187	0.6399	0	0.5878	0.5505	0.3684	0.2029	0	0.6592	0	0	0	0	0	0.2353
0.4843	97.1009	0	0	0	0	0	0	0	0	0	0.3358	0	0	0	0	0	0	0	0	0	0	0.088	0.3867	0.2829	0	0	0.5784	0.2653	0	0	0	0	0	0	0.3434	0	0.1972	0.2055	0.2679	0	0	0	0	0	0.4331	0.1003	0.6122	0	0.8059
0.83	97.1008	0	0	0	0	0	0	0	0	0	0	0	0	0	0	0	0	0	0	0	0	0	0	0	0	0	0	0	0	0.0732	0	0.1036	0	0	0	0	0	0.1451	0	0	0	0	0	0	0	0	0	0	0
2.5605	97.0963	0	0	0	0	0	0	0	0	0	0	0	0	0	0.101	0.2088	0	0.4965	0	0	0	0	0.2926	0	0.1619	0.3304	0.352	0	0	0	0	0	0	0	0	0.6109	0	0.1595	0	0.5246	0.1274	0	0	0	0	0	0	0	0
0.6426	97.0921	0	0	0	0	0	0	0	0.3589	0.5237	0.7835	0	0.6522	0.832	0.7786	0.7349	0.468	0.6694	0.3567	1.4726	1.0003	0.5362	0.342	0.9174	0.7971	0.6417	1.1846	0.1755	0	0.3003	0.4973	0.5585	0.5448	0.404	0.2978	0	0.0557	0.3597	0.1495	0.9673	0.8234	1.304	0	0.7306	0.8101	0.5113	0.5542	1.2512	0.6195
2.7326	97.087	0	0	0	0	0	0	0	0	0	0	0	0	0	0.2155	0.9963	0.4874	0.3556	0	0	0.1352	0.6845	0	0	0	0.1524	0	0	0.0811	0.2484	0	0.313	0	0	0	0.1503	0	0	0	0.0905	0	0	0	0.0117	0	0	0	0	0
1.2034	97.0862	0	0	0	0	0	0	0	0.203	0	0	0.095	0.6132	0	0	0	0.2568	0.0478	0.3734	0	0	0	0	0.3712	0.2466	0.213	0.2068	0.0229	0.2429	0	0.2584	0	0	0.1165	0	0	0	0	0.137	0	0.1088	0	0	0.602	0	0	0	0	0.0993
1.5933	97.084	0	0	0	0	0	0	0	0	0	0	0	0.6759	0.4079	0.5793	0.5713	0.1284	0.3832	0	0.4917	0.1493	0.6138	0	0	0.238	0.1524	0	0.3738	0.4184	0.0264	0	0	0	0.4874	0.3967	0	0	0	0	0	0.1525	0	0.4096	0	0	0.6663	0	0	0
0.8551	97.0721	0	0	0	0	0	0	0	0	0	0	0	0	0	0	0	0	0	0	0	0	0	0	0	0	0	0	0	0.1305	0.1325	0	0	0	0	0	0	0.5276	0	0	0	0	0	0	0	0	0	0	0	0
2.9682	97.0679	4.707	0	0	0	2.3538	0	0	0.3107	0	0	0	0	0	0.5619	0	0	0	0	0.0508	0	0	0	0.5259	0.3167	0	0.5282	0.2655	0.1656	0	0	0.2929	0	0.2502	0.5085	0.0513	0.3635	0.4307	0	0.3037	0	0	0	0	0	0	0	0	0
2.2144	97.0671	0	0	0	0	0	0	0	0	0	0	0	0	0	0	0.2519	0	0.1854	0	0	0	0	0.3365	0	0.2111	0	0	0	0.1089	0	0	0	0	0.0807	0	0	0	0.444	0.4231	0.1502	0	0	0	0	0	0.0974	0	0	0
2.0873	97.066	0	0	0	0	0	0	0	0.8556	0.7305	0.7321	0.8944	0.3627	0.6107	0.8023	1.2631	0.7209	0.7521	0.4101	1.2443	0.695	0	0.8537	0.9639	0.1612	0.5674	0	0.9108	0.9223	0.6203	0.5097	0.4106	0.9911	0.7051	0.8242	0	0.941	1.0949	1.0382	1.1962	0.4154	0.8272	0	0.6146	0	0	0.6959	0.6893	0.6524
0.4637	878.638	0	0	0	0	0	0	0	0	0	0	0	0	0	0	0	0	0	0	0	0	0	0	0	0	0	0	0	0	0	0	0	0.3411	0	0	0	0	0	0.4136	0	0	0	0	0	0	0	0	0	0
3.0896	878.575	0	0	1.3129	0	0.701	0	0	17.5289	17.0084	18.092	19.9359	19.022	20.4755	15.3451	19.9893	27.3062	13.8503	20.3708	29.5301	22.1672	24.6744	19.4102	17.6058	13.015	20.2168	27.3034	8.4494	13.1925	22.7726	22.3681	13.2244	23.5549	21.2903	23.4725	27.6609	20.6702	13.8094	23.0055	14.4582	8.6279	33.5875	29.4815	11.7064	25.4215	21.8006	7.8232	20.1634	21.9237
0.553	878.182	0	0	0	0	0	0	0	0	0	0	0	0.5479	0	0	0	0	0	0	0	0	0	0	0	0	0	0	0.0651	0	0	0	0	0	0	0	0	0	0	0	0	0	0	0	0.129	0	0	0	0	0
0.5445	877.681	0	0	0	0	0	0	0	0.9787	0.8967	0.999	1.0682	0.8771	1.0606	1.0687	1.6096	2.4633	1.1538	1.3363	0	0.9891	1.2596	0	0	0.2029	1.0031	0	0.6322	1.8804	1.3276	1.5339	1.6747	1.4064	1.2853	0	1.4621	1.776	0	0.6951	0	2.4096	0.6437	1.5776	3.8133	0	0.5912	0	1.0607	0
3.0866	877.572	0	0	0	0	0	0	0	0	0.2678	0.2813	0	0.1973	0	0.062	0	0.0229	0.0742	0.0225	0.0126	0.0482	0	0	0	0.1308	0	0.1944	0.1363	0	0.0971	0	0	0	0	0.1796	0	0.071	0.1012	0.1202	0	0.1111	0.2564	0.4843	0	0	0	0	0	0.046
2.1499	876.792	0	0	0	0	0	0	0	0	0	0	0	0	0	0.2494	0.2147	0	0	0	0	0	0	0	0	0	0	0	0	0	0	0	0	0	0	0	0	0	0	0	0	0	0	0	0	0	0	0	0	0
3.078	876.567	3.4696	0	0	0	2.8222	0	0	0.682	0.5489	0.4751	0.2068	0.1165	0.1076	0.5522	0.318	0.1567	0.2073	0.2215	0.209	0.1865	0.2765	0.2177	0.2697	0.1433	0.1564	0.274	0.2492	0.0938	0	0	0.1387	0.1463	0.0421	0.3814	0	0.1041	0.1469	0.2629	0.1556	0.1016	0.2606	0.4316	0.4202	0.369	0.2527	0	0.5974	0.0246
2.0644	875.064	0	0	0	0	0	0	0	0	0	0	0	0	0	0	0	0.501	0.0501	0	0	0	0	0	0	0	0.4426	0	0	0	0	0	0	0	0.4613	0.0802	0	0	0	0	0	0	0.2836	0	0	0	0	0	0	0
3.0838	874.558	0	0	0	0	0	0	0	0	0	0.1128	0	0.1374	0	0	0	0	0.1405	0	0	0	0	0	0	0	0	0	0.0877	0.0352	0	0.0317	0	0	0	0	0	0	0.1255	0	0	0	0	0	0.2233	0.2083	0	0	0.1637	0.1843
2.0584	874.068	0	0	0	0	0	0	0	0	0	0.2913	0	0.3651	0	0.5383	0.5125	0.1733	0.5222	0.3269	0	0.3587	0.5091	0	0.3514	0	0.0536	0.3249	0	0.0953	0.0405	0.25	0.1239	0.176	0.4896	0.7302	0.4025	0.182	0.7724	0.3148	0.3935	0	0.3065	0.417	0	0	0.0628	0.3295	0.2731	0.3809
2.0577	873.069	0	0	0	0	0	0	0	0.3188	0.294	0	0.244	0.1863	0.3511	0.5345	0.4681	0.2623	0.2032	0.2439	0.2448	0.2904	0.3773	0.2339	0.1066	0	0.5349	0.2404	0.2691	0.1606	0.0624	0.1642	0.2051	0.2722	0.361	0.8009	0.3271	0.2583	0.3269	0.5621	0.2554	0	0.2483	0.0865	0.3617	0.4441	0.3708	0.1777	0.1103	0.625
3.0926	872.581	0	0	0	0	0	0	0	0	0.0988	0.163	0	0	0	0	0.1256	0	0.0208	0.0578	0	0.1059	0.1601	0.0697	0.135	0	0.0757	0	0	0	0.0368	0	0	0.0922	0	0.0902	0	0.0706	0	0	0	0	0.1025	0.0163	0	0	0	0	0	0.1985
0.6856	872.538	0	0	0	0	0	0	0	0	0	0	0	0	0	0	0	0	0	0.2014	0	0	0	0	0	0	0	0	0	0.0467	0	0	0	0	0	0	0	0	0	0	0	0	0	0	0	0	0	0	0	0
2.058	872.072	0	0	0	0	0	0	0	0.317	0	0.3573	0.2566	0.2206	0.2807	0.0836	0.3955	0.4893	0.4166	0.4348	0.6381	0.2406	0.4207	0.1612	0.2537	0	0.1966	0.3122	0	0.1609	0.0345	0.2102	0.1841	0.2059	0.3303	0.6164	0.3637	0	0.4429	0.5058	0.1999	0	0.6954	0.3782	0	0.6147	0	0.1914	0	0.1725
3.09	871.585	0	0	0	0	0	0	0	0	0	0.1605	0.1456	0.1606	0.1969	0	0.1547	0	0	0.1767	0	0.097	0	0	0.1468	0.0961	0.1824	0.1084	0	0.0442	0	0	0	0.0098	0.0087	0.2102	0.1498	0	0	0.0637	0.124	0.1201	0	0.1898	0.1039	0.2352	0.1982	0.1238	0	0.1809
2.0584	871.074	0	0	0	0	0	0	0	0	0	0.1889	0.2163	0	0.2025	0.2842	0.1941	0.108	0.2532	0.1879	0.1391	0.1177	0.3172	0.1184	0.1541	0	0.2497	0.1952	0.0923	0.0264	0	0	0.136	0.0955	0.1422	0.3185	0.1945	0.054	0.4495	0.3139	0.2089	0	0.3045	0.0838	0	0.2919	0.1665	0.1277	0	0.3085
1.782	400.123	0	0	0	0	0	0	0	0	0	0	0	0	0	0	0	0	0	0	0	0	0	0	0	0	0.2192	0	0	0	0.0832	0	0	0	0	0	0	0	0	0	0	0.1008	0	0	0	0	0	0	0	0
0.536	400.114	0	0	0	0	0	0	0	0.8913	0.8527	0.8078	0.9253	0.8309	0.8802	0.9541	1.3448	1.9601	0.9713	1.0499	0	0.8047	0.9991	0	0	0.2466	0.8042	0	0.5907	1.6649	1.0651	1.2172	1.2863	1.0643	1.0325	0	1.1319	1.3521	0	0.5309	0.8702	1.7953	0.5734	1.27	2.8523	0	0.5282	0	1.105	0.2332
3.1526	400.018	0	0	0	0	0	0	0	0.0177	0	0	0.0814	0.0909	0.0427	0	0.4933	0	0	0.1983	0	0.3546	0.0247	0	0.0485	0.0135	0	0	0	0.12	0	0.2057	0	0.2692	0.0196	1.7583	0	0.0107	0	0	0	0.022	0.1328	0.1994	0	0	0.269	0	0.1915	0.0313
0.4598	399.325	0	0	0	0	0	0	0	0	0.2638	0.1502	0	0	0	0	0	0	0	0.0773	0	0	0.0946	0.1511	0	0.0902	0.1365	0.1366	0.0909	0.0495	0.0515	0.0906	0.052	0	0.0973	0	0	0.0699	0.1457	0	0	0	0	0	0	0	0	0	0	0
0.4951	399.254	0	0	0	0	0	0	0	0	0	0	0	0	0	0	0	0	0	0	0.1515	0	0	0.1814	0	0	0	0.1975	0	0	0	0	0	0	0	0	0	0.1124	0	0.2119	0	0	0.1485	0.261	0	0	0	0	0.2657	0.3697
1.7469	399.205	0	0	0	0	0	0	0	0.3855	0	0.2718	0.3811	0.2795	0	0	0.1858	0.0707	0	0	0	0.3725	0	0	0	0.0627	0	0.1149	0.2397	0.1818	0	0.3156	0	0.1455	0	0	0	0	0	0.3486	0.1618	0.0973	0	0.5616	0	0	0	0	0.5737	0.5105
1.1948	399.201	0	0	0	0	0	0	0	0.1566	0	0.1868	0	0.1628	0.2031	0.3393	0	0.0308	0	0	0	0.2904	0.0925	0.218	0.5814	0	0	0.9209	0	0	0.0581	0	0.1559	0.4981	0.1578	0	0.4415	0	0	0.1154	0.1623	0.0815	0.4847	0	0	0.2147	0	0.4494	0.4785	0.0549
2.8071	399.2	0	0	7.1617	0	0	0	0	0	0	0.5083	0.1127	0	0	0	0.0368	0	0	0	0.0605	0.3103	0.102	0.1226	0.4137	0	0	0.1224	0.1578	0	0	0	0	0	0.0966	0.0449	0.1067	0	0	0	0.6255	0.1244	0	0	0	0	0	0	0	0
0.9918	399.2	0	0	0	0	0	0	0	0	0.6628	0	0	0.0649	0	0.5589	0.276	0.3529	0	0.5147	0.0787	0.725	1.1644	0.4505	0.3145	0.0728	0.0565	0.1571	0	0.106	0	0.2418	0	0.3334	0	0.1175	0.2655	0.6414	0	0	0.4678	0	0.1102	0.2163	0	0	0.5608	0	0.8845	0.1035
1.564	399.2	0	0	0	0	0	0	0	0	0	0	0	0	0	0	0	0	0	0	0	0	0	0	0	0	0	0	0	0	0	0	0	0	0	0	0	0	0	0	0	0	0	0.311	0	0	0	0	0.5513	0.4114
2.2006	399.196	0	0	0	0	0	0	0	0	0.2214	0	0	0	0	0	0.1844	0	0.0738	0	0	0.794	0	0	0.0808	0	0.155	0	0	0.0743	0	0	0	0	0	0.2887	0.1905	0	0.2788	0.1889	0	0	0	0	0	0	0	0	0	0
2.457	399.195	0	0	0	0	0	0	33.3139	0	0	0	0	0	0	0	0	0.5454	0	0	0.2195	0	0	0	0	0	0.2282	0	0	0	0	0	0	0	0	0	0	0	0	0	0	0.0102	0	0	0	0	0	0	0	0
0.7217	399.195	0	0	0	0	0	0	0	0	0	0.0684	0	0	0	0	0	0	0	0	0	0	0.1142	0	0	0	0	0	0	0	0.016	0	0	0	0	0	0	0	0	0	0	0	0	0	0	0	0	0	0	0
0.5366	399.188	0	0	0	0	0	0	0	0	0	0	0	0	0	0	0	0	0	0	0	0	0	0.2922	0	0	0	0	0	0	0	0	0	0	0	0	0	0	0	0	0	0	0	0	0	0	0	0	0	0
1.8513	399.129	0	0	0	0	0	0	0	0	0	0	0	0	0	0	0.2159	0	0	0.2103	0	0	0	0	0	0	0	0	0	0	0	0	0	0.1066	0	0.2374	0	0	0	0	0	0	0	0	0	0	0	0	0	0
3.058	399.082	0	0	0	0.4945	0	0	0	0.0151	0	0.0703	0	0.1964	0	0.4093	0	0.2615	0.4288	0	0.799	0	0	0.1679	0.6814	0.3795	0	0.1932	0	0.481	0	0	0.1523	0.0061	0	0	0	0.4663	0	0	0.2429	0.1334	0.8183	0	0.2354	0.2454	0	0.2878	0	0
0.911	248.114	0	0	0	0	0	0	0	0	0.5411	0.4731	0.5353	0.4763	0.4654	0.759	1.258	0	1.0759	0.3262	0	0.7416	0.3451	0.8254	0.6992	0	0.6146	1.3552	0.8704	0	0	0.5787	0	0	0.7619	0.8346	0	0	0.8869	0	0.799	0	0.9053	0.5341	0	0.758	0.39	0	0.53	0.5044
0.7369	248.105	0	0	0	0	0	0	0	0	0	0	0	0	0	0	0.4174	0.5863	0	0	0	0	0	0	0.5664	0	0	0	0.3057	0	0	0	0	0	0.3027	0	0.2206	0	0	0	0	0	0	0.3896	0	0	0	0	0	0
2.2756	248.093	0	0	0	0	0	0	0	50.1471	48.2587	47.1894	50.532	48.4183	50.1879	59.8107	85.3278	17.4805	53.902	34.8207	33.8189	87.101	44.112	52.4984	64	34.5203	53.7338	64.9264	55.6687	45.842	20.3093	75.2546	28.7236	53.3008	42.8904	78.9623	8.2452	33.3102	55.6975	32.6612	55.5535	43.5312	68.5721	61.0533	37.3155	54.547	45.4167	28.4098	73.1216	68.3892
2.0974	248.091	0	0	0	0	0	0	0	0.2257	0.3136	0.3795	0	0.3121	0.295	0.2339	0.2184	0.0758	0	0	0	0	0	0.3615	0.3266	0.2227	0.0905	0	0.3093	0	0.2895	0.2058	0.0946	0.3484	0.1645	0.1766	0.1457	0.2902	0.3411	0.2213	0.7086	0.1977	0	0.3669	0.1812	0.2776	0.147	0.4082	0	0
0.4931	248.073	0	0	0	0	0	0	0	0	0	0	0	0	0	0	0	0.0955	0	0	0	0.8967	0	0	0.349	0.2296	0	0	0.1688	0	0	0	0	0	0	0.4459	0	0.065	0	0.2607	0.5656	0	0	0	0	0.5433	0	0	0	0
1.4031	248.064	0	0	0	0	0	0	0	0.5506	0.5126	0.5704	0.592	0.7039	0.7531	0.4248	0.3898	0.4545	0.6339	0.4472	0.656	0.4523	0.278	0.6445	0.3662	0.2162	0.3987	0.4782	0.4344	0.5189	0.3813	0.4457	0.4918	1.0102	0.5002	0.6473	0.5703	0.8042	0.7687	3.3696	0.3194	0.2961	0.6812	0.2487	0.3856	0.7401	0.3927	0.4327	0.419	0.2823
1.6442	248.059	0	0	0	0	0	0	0	0	0	0	0	0	0	0	0	0	0	0	0	0	0	0	0	0	0	0	0	0	0	0	0.5159	0	0	0	1.1431	0	0	0	0	0	0	0	0	0	0	0	0	0
3.5324	248.058	0	0	0	0	0	0	0	0	0.135	0	0	0	0	0.3509	0.3013	0.2188	0.209	0.2372	0.1744	0	0.1389	0	0.2801	0.3957	0	0.2964	0	0.3094	0.1051	0	0	0	0.1718	0	0	0	0	0	0	0	0	0.0062	0	0	0	0	0.0679	0
1.2064	248.035	0	0	0	0	0	0	0	0.4907	0	0	0	0	0.0558	0	0	0.3024	0.3469	0.2241	0	0.1747	0.3376	0	0	0	0	0	0	0.187	0.0699	0	0	0	0	0	0	0	0	0	0	0	0	0	0	0	0	0	0	0
0.5035	248.023	0	0	0	0	0	0	0	55.6781	55.0883	54.0022	58.2864	56.3763	57.2169	53.3353	65.5331	47.6053	90.7302	45.0404	0	39.287	53.1934	0.4402	0.9897	7.4452	38.1347	0	25.5717	120.293	106.522	67.1267	60.8347	81.8226	84.4293	0	37.4014	107.836	0	25.4584	0.5592	111.81	54.2117	86.9109	84.1565	7.656	29.7184	0	72.6616	25.812
1.6722	248.023	0	0	0	0	0	0	0	0	0	0	0	0	0	0	0	0	0	0	0	0	0	0	0	0	0	0	0	0	0	0	0	0	0.5825	0	0	0	0	0	0	0	0	0	0	0	0	0	0	0
1.6242	247.144	0	0	0	0	0	0	0	2.0202	1.8642	1.8799	1.9704	1.8398	1.8502	11.4385	1.7886	5.3849	1.0305	0.4051	1.8547	1.0751	0.8412	0.2986	1.3069	0.128	3.0631	1.1139	1.0408	2.3758	1.0739	0.3563	0.7477	1.363	2.2342	6.5363	2.2097	0.1892	1.6671	0.2959	0.3993	0.6422	12.7726	1.6216	3.7354	1.1648	0.4171	3.3118	0.7557	0.7896
0.5351	247.143	0	0	0	0	0	0	0	0	0	0.2806	0.2377	0	0	0.372	0.6222	0.1658	0	0.142	0	0.3868	0.1909	0.3159	0.5132	0.0522	0.381	0.846	0.2539	0.0911	0.0521	0.3582	0.2394	0	0	0.3202	0.3304	0	0.5736	0	0.3983	0.2055	0.634	0	0	0	0	0	0	0
2.2755	247.108	0	0	0	0	0	0	0	27.0174	26.0532	25.0417	25.08	26.0203	26.7856	31.943	46.2035	9.628	28.9251	18.8627	18.821	46.1844	23.8386	27.8963	33.6849	18.5016	29.2499	34.7547	28.0906	24.1008	10.7457	39.5022	15.4508	28.1591	22.5898	41.8015	5.2617	17.9248	29.3518	17.6914	29.4332	23.478	36.8639	32.4097	20.3726	30.3563	24.7946	15.6046	38.6899	37.1225
1.2406	247.107	0	0	0	0	0	0	0	0	0	0	0	0	0	0	0	0	0.3435	0.1875	0	0	0	0	0	0	0.354	0	0	0.7263	0.0458	0	0	0.7375	0	0	0.4118	0	0	0	0	0	0	0	0	0.2947	0	0	0	0
1.947	247.096	0	0	0	0	0	0	0	0	0	0	0	0	0	0	0	0	0	0	0	0	0	0	0	0	0	0	0	0	0	0	0	0	0	0	0	0	0	0	0	0	0.9626	0.549	0	0.7335	0	0.5402	0.4013	0
0.6588	100.039	0	0	0	0	0	0	0	0	0	0	0	0	0	0.2405	0	0	0	0	0	0	0	0	0	0	0	0	0	0	0	0	0	0	0	0.4284	0	0	0	0	0.53	0.182	0	0	0	0	0	0	0	0
1.5014	99.1156	0	0	0	0	0	0	0	0	0	0	0	0	0	0	0	0	0	0	0	0	0	0	0.1423	0.1332	0	0	0	0	0	0	0	0	0	0	0	0	0	0	0	0	0	0	0	0	0	0	0	0
1.9924	99.08	0	0	0	0	0	0	0	0	0	0	0	0	0	0	0	0	0	0	0	0	0	0.4434	0.3486	0.3782	0	0.3725	0	0.3399	0	0	0.288	0.4746	0.1731	0	0.2699	0.2812	0	0.4221	0.5016	0	0	0	0	0	0.2525	0	0	0
2.3089	99.045	0	0	0	0	0	0	0	0	0	0	0	0	0	0	0	0	0	0	0	0	0	0	0.272	0	0	0.2056	0	0	0	0	0	0	0	0	0	0	0	0	0	0	0	0	0	0	0	0	0	0
2.1397	99.0446	0	0	0	0	0	0	0	0.2792	0	0	0	0	0	0.3325	0.4677	0	0.3625	0.3187	0.4528	0	0	0.4848	0.7018	0.2472	0.3336	0.7506	0.2527	0.2423	0	0	0.1788	0	0.2035	0.4607	0.2567	0	0	0	0.4869	0.2256	0	0.5283	0	0	0.3069	0	0	0
3.4496	99.0445	0.8953	0	0	0	0.3937	0	0	0	0	0	0.412	0.33	0.1875	0	0.2082	0	0	0	0	0	0.323	0	0	0.0944	0	0	0	0	0.0391	0	0	0	0	0	0	0	0.2932	0	0	0	0	0	0	0	0.354	0	0.1733	0.3353
0.8127	99.0444	0	0	0	0	0	0	0	0	0	0	0	0	0	0	0	0	0	0	0	0	0	0	0.7423	0.1685	0.3252	0	0.2929	0	0	0.3685	0	0	0	0	0	0	0.4628	0.2394	0.1997	0	0	0	0	0	0	0	0	0
0.4312	98.9847	0	0	0	0	0	36.9026	0	0	0	0	0	0	0	0.3604	0.272	0.1367	0.6477	0.209	0.4293	0.2556	0.6303	0.2344	0.7786	0.2441	0.2891	0.2315	0.4024	0.0443	0.387	0.1474	0.1153	0.1364	0.3077	0.0754	0.4527	0.1015	1.1555	0.1769	1.3626	0.1083	1.9087	0.3075	0.448	3.8987	0.6044	0.5271	0.4036	1.0164
1.9313	98.0966	0	0	0	0	0	0	0	0	0	0	0	0	0	0	0	0	0	0	0	0	0	0	0	0	0	0	0	0.0907	0	0	0.1415	0	0	0	0	0	0	0	0	0	0	0	0	0	0	0	0	0
3.4268	98.095	0	0	0	0	0	0	0.1704	0.7026	0.539	0.5748	0.5886	0.5834	0.5491	0	0.2478	0.362	0.5772	0.3744	0.8483	0.6093	0.6304	0.591	0.3764	0.3224	0	0.4185	0.1919	0.1438	0	0.2324	0.5597	0.1928	0.4906	0	0.6279	0.3578	0.4427	0.5654	0.2426	0.4962	0.4886	0.5675	0.4533	0.9508	0.5001	1.2127	0.715	0.9215
2.4993	98.0939	0	0	0	0	0	0	0	0	0	0	0	0	0	0.2592	0	0	0	0	0	0	0	0	0	0	0	0	0	0.0774	0	0.297	0	0	0	0.2159	0.1782	0	0	0	0	0	0	0	0	0	0	0	0	0
0.8076	98.0625	0	0	0	0	0	0	0	0	0.3531	0	0.3858	0.3373	0	0	0	0.1371	0	0	0	0	0.0873	0	0.4407	0	0.1018	0.7935	0	0	0.5249	0.4506	0.3074	0	0	0	0	0.1389	1.152	0.257	0	0	0	0.1285	0	0	0.1945	0.4935	0.3439	0
2.7595	98.0603	0	0	0.5887	0	0.4242	0	0	0	0.1956	0	0.1694	0.1905	0	0	0.3672	0.3517	0	0.1526	0.5419	0.4911	0.2581	0.2422	0.1587	0.2691	0.1627	0.6788	0.1877	0.4118	0.2758	0.4083	0.1282	0.3581	0.1916	0.2598	0.3537	0.3159	0.3977	0.3301	0	0.1517	0.3476	0.1458	0	0	0	0	0	0
0.6746	98.0603	0	0	0	0	0	0	0	1.8497	1.7927	1.7301	1.5072	1.9183	1.9348	1.98	3.0667	2.1138	1.82	1.4428	2.8358	2.9397	1.1589	2.4124	1.6737	1.4575	2.0765	3.4171	2.0699	2.0216	1.5406	2.0026	1.3061	1.9763	2.3493	2.4257	2.1657	1.8922	3.7263	3.2536	1.9686	1.2565	1.9217	1.6838	1.1249	1.5884	1.4791	2.9112	1.8623	1.363
1.1815	98.0599	0	0	0	0	0	0	0	0	0	0	0	0	0	0	0	0	0	0	0	0	0	0	0.2387	0	0.2658	0.2294	0	0.0877	0	0	0.1603	0.1312	0	0.2328	0.1575	0.3148	0.1658	0.5263	0.2121	0.0629	0	0	0	0	0	0	0	0
1.7596	98.0581	0	0	0	0	0	0	0	0	0	0	0	0	0	0	0	0	0	0	0	0	0	0	0	0.1469	0	0	0	0	0	0	0	0	0	0	0	0	0	0	0.1132	0	0	0	0	0	0	0	0	0
0.5273	892.675	0	0	0	0	0	0	0	0	0	0	0	0	0	0	0	0.0898	0.0683	0	0	0	0.0703	0	0	0	0	0	0	0.1283	0.0724	0	0	0.2083	0.0766	0	0.0588	0.1125	0	0.3039	0	0.1922	0	0	0	0	0	0	0	0
0.4646	892.649	0	0	0	0	0	0	0	0	0	0	0	0	0	0	0	0	0	0	0	0	0	0	0	0	0	0	0	0	0	0	0	0.1225	0	0	0	0	0	0.1347	0	0	0	0	0	0	0	0	0	0
0.437	891.661	0	0	0	0	0	0	0	0	0	0	0	0	0	0	0	0	0	0	0	0	0	0	0	0	0	0	0	0	0	0	0	0	0	0	0	0	0	0.0693	0.1507	0	0	0	0	0	0	0	0	0
3.0561	887.637	1.0056	0	0	0	0	0	0	0	0.048	0	0	0	0	0.0679	0.1076	0.1115	0.2581	0	0	0	0	0	0.1181	0	0	0	0	0.1161	0	0	0.0423	0	0	0	0.1287	0	0.6184	0	0.0533	0	0	0.0758	0	0	0.0314	0	0	0.0611
1.076	887.257	0	0	0	0	0	0	0	0	0	0	0	0	0	0	0	0	0.0824	0	0	0	0	0	0	0	0	0	0	0.1925	0	0	0.1093	0	0	0	0	0.0671	0	0	0	0.0685	0	0	0	0	0	0	0	0
0.549	886.688	0	0	0	0	0	0	0	0	0	0	0	0	0	0	0	0	0	0	0	0	0	0	0	0	0	0	0	0	0	0	0	0	0	0	0	0	0	0	0	0	0	0	0	0	0	0	0	0.1303
0.5434	886.194	0	0	0	0	0	0	0	2.0306	1.7742	2.161	2.2283	2.1102	2.3071	2.1422	3.3744	5.1981	2.4863	2.7384	0	1.9437	2.6788	0	0	0.3717	2.0254	0	1.5129	4.1312	3.01	3.2634	3.771	2.8756	2.7869	0	3.1387	3.767	0	1.3754	0	5.1853	1.3398	3.1106	8.2955	0	1.3439	0	2.1454	0.1702
0.7943	885.543	0	0	0	0	0	0	0	0	0	0	0	0	0	0	0	0	0	0.1232	0	0	0.0808	0	0	0	0	0	0	0	0	0	0	0	0	0	0	0	0	0	0	0	0	0	0	0	0	0	0	0
1.7595	885.253	0	0	0	0	0	0	0	0	0	0	0	0	0	0	0	0	0	0	0	0	0	0	0	0	0	0	0	0	0.3583	0	0	0	0	0	0	0	0	0	0	0.1258	0	0	0	0	0	0	0	0
0.5054	885.137	0	0	0	0	0	0	0	0	0	0	0	0	0	0	0	0.1751	0.0892	0	0	0	0	0	0	0	0	0	0	0	0	0	0	0	0	0	0	0	0	0	0	0	0	0	0	0	0	0	0	0
0.4334	884.653	0	0	0	0	0	0	0	0	0	0	0	0	0	0	0	0	0	0	0	0	0	0	0	0	0	0	0	0	0	0	0	0	0	0	0	0	0	0.057	0.0942	0	0	0	0	0	0	0	0	0
3.0902	884.57	0	0	0	0	0	1.3315	0	0.7429	1.0997	0.9062	1.204	0.9413	0.9191	0.3848	0.9595	1.2713	0.76	1.1459	1.4701	1.2502	0.853	0.7028	0.8465	0.6399	1.0753	1.2643	0.3676	0.5737	1.1058	1.1767	0.7693	1.2222	1.1343	1.2043	0.5976	0.8309	0.5949	1.1892	0.6047	0.4777	0.9934	1.4105	0.6399	1.0971	0.8397	0.3109	0.9032	1.0056
0.4368	884.198	0	0	0	0	0	0	0	0	0	0	0	0	0	0	0	0	0	0	0	0	0	0	0.2591	0	0	0	0	0.0326	0	0	0	0	0	0	0	0	0	0	0	0	0	0	0	0	0	0	0	0
1.5329	883.24	0	0	0	0	0	0	0	0	0	0	0	0	0	0	0	0	0	0	0	0	0	0	0	4.0597	0	0	0	0	8.1286	0	0	0	0	0	0	0.4022	0	0	0	7.3958	0	0	0	0	0	0	0	0
1.8488	883.24	0	0	0	0	0	0	0	0	0	0	0	0	0	0	0	0	0	0	0	0	0	0	0	0	0	0	0	0	0.2735	0	0	0	0	0	0	0	0	0	0	0.2223	0	0	0	0	0	0	0	0
2.2896	881.266	0	0	0	0	0	0	0	0	0	0	0	0	0	0	0	0	0	0	0	0	0	0	0	0	0	0	0	0	0	0	0	0	0	0	0	0	0	0	0	0	0	0	0.1996	0.3228	0	0	0.3325	0
3.0822	401.996	0	0	0.1043	0	0	0	0	0.1425	0	0	0	0	0	0	0	0.0574	0	0	0	0	0.0238	0	0	0	0	0	0.002	0.1747	0.2759	0	0	0.0326	0	0	0	0.0957	0	0	0	0	0	0	0	0	0.0218	0	0	0
1.6674	401.337	0	0	0	0	0	0	0	0	0.1393	0.1435	0	0.181	0	0.1526	0.1175	0.1146	0	0.0879	0.1193	0.2047	0	0.1767	0.0715	0.1217	0	0.128	0.1108	0.0653	0	0	0.1532	0.1045	0.1198	0.1898	0	0	0.1896	0	0.1572	0.0632	0.1882	0	0	0	0	0	0	0
0.7454	401.237	0	0	0	0	0	0	0	0	0	0	0	0	0	0	0	0	0.1384	0	0	0	0	0	0	0.5485	0	0	0	0	0	0	0	0	0	0	0	0	0	0	2.1612	0	0	0	0	0	0	0	0	0
1.0152	401.212	0	0	0	0	0	0	0	0	0	0	0	0	0	0	0.3477	0	0	0.2089	0	0.4143	0	0	0.4421	0	0	0	0	0	0	0.2961	0	0.4183	0	0	0	0	0	0.5618	0	0	0	0	0	0	0	0	0	0
0.6835	401.159	0	0	0	0	0	0	0	0	0	0	0	0	0	0	0	0	0	0	0	0	0.0981	0	0	0.6599	0	0	0	0	0.1758	0	0	0	0	0	0	0.0806	0	0	0	0.3928	0	0	0	0	0	0	0	0
3.2213	401.155	0	4.6005	0	0	0	0	0	0.2954	0	0.8025	0	0.309	0	0	0	0	0	0.0089	0.4231	0.0558	0	0	0.2448	0.18	0	0	0	0.0233	0	0	0.0949	0	0.0363	0	0	0.3771	0	0	0	0.212	0	0.3963	0	0.0302	0.4344	0.6511	0	0
0.5135	401.066	0	0	0	0	0	0	0	0	0	0	0	0	0	0	0	0	0	0	0	0.0981	0	0	0	0	0	0	0	0	0	0	0	0	0	0	0	0	0.1997	0	0	0	0	0	0	0	0	0	0	0
0.7	400.377	0	0	0	0	0	0	0	0.2284	0.4056	0.2507	0.0995	0	0	0.1684	0.1695	0.1855	0.1731	0.196	0.2535	0.1571	0.2093	0.2414	0.2552	0.1586	0.2278	0.2061	0.1665	0.0797	0.0852	0.1832	0.097	0.1367	0.1616	0.1461	0.1295	0	0.2174	0.1685	0.1237	0.087	0.1551	0	0	0.2747	0	0	0	0.1179
3.1535	400.269	1.5514	4.2929	0	0	0.436	0	0	0	0	0.0214	0	0.064	0	0	0.0645	0	0	0	0	0	0	0.135	0	0	0	0	0	0.1119	0	0	0	0	0.1463	0	0	0	0	0	0	0	0	0	0	0	0	0	0	0
1.7591	400.269	0	0	0	0	0	0	0	0	0	0	0	0	0	0	0	0	0	0	0	0	0	0	0	0	0	0	0.2127	0	0	0	0	0	0	0	0	0	0.1712	0	0	0	0	0	0	0	0	0	0	0
1.9354	400.268	0	0	0	0	0	0	0	1.4939	1.2636	1.1892	1.496	1.251	2.458	0.8405	4.0843	1.9779	3.5722	2.0088	4.9233	5.7587	1.1948	1.2854	4.5669	1.6587	3.3662	3.5727	2.3282	2.1146	3.7885	2.9571	2.4739	4.0961	1.2583	1.9911	3.3366	2.1203	3.042	5.1339	1.5607	2.6103	1.2549	0.6549	0.3239	1.1208	1.5353	1.2491	2.2281	0.8121
2.1456	400.268	0	0	0	0	0	0	0	0.5349	0.2743	0.7873	0.962	0.8824	0.9715	0.1557	2.0381	1.2147	0.3033	1.1006	1.5277	0.284	0.289	1.6781	2.3998	0.7824	0.7145	0.5586	1.6556	1.1832	0.9327	1.1257	1.0252	2.2001	2.1447	0.3319	1.066	0.7416	1.2063	1.5255	1.7248	0.7047	0.2277	1.9097	0	0	0.9376	0.516	0	0.1282
2.5506	400.268	0	0	0	0	0	0	0	0	0	0	0	0	0	0	0	0	0	0	0.4016	0.2632	0	0	0.2592	0.2841	0	0	0.5637	0	0	0.4315	0.2566	0.2124	0	0	0	0	0	0	0	0.2188	0	0	0	0	0	0	0	0
0.6417	400.252	0	0	0	0	0	0	0	0	0	0	0	0	0	0	0	0	0	0	0	0	0	0	0	0	0	0.2004	0	0.0956	0	0	0	0	0	0	0	0	0	0	0	0	0	0	0	0	0	0	0	0
1.263	400.226	0	0	0	0	0	0	0	0	0	0	0	0	0	0	0	0	0	0	0	0	0	0	0	0	0	0	0	0.129	0	0	0	0	0	0	0	0	0	0	0	0	0	0	0	0	0	0	0	0
1.917	400.211	0	0	0	0	0	0	0	0	0	0	0	0	0	0	0	0	0	0	0	0	0	0	0	0	0	0	0	0	1.8077	0	0	0	0	0	0	0	0	0	0	1.4476	0	0	0	0	0	0	0	0
2.0971	249.142	0	0	0	0	0	0	0	0.4445	0	0	0	0	0	0	0.4126	0	0	0	0.1424	0.2781	0	0.4772	0	0	0	0	0.1831	0	0	0	0	0	0	0.2482	0	0	0	0	0	0	0.4207	0	0.2244	0	0	0	0	0
0.7517	249.125	0	0	0	0	0	0	0	0.4622	0	0.2023	0.1784	0.2461	0	0	0.3564	0.349	0.3037	0.2151	1.2807	0	0.2222	0.684	1.244	0.8283	0.4493	0.0651	0.0864	0	0.4161	0.4321	0.1373	0.0721	0.2175	0.1225	0.5856	0.5605	0.5107	0.191	0.3763	0.3311	0	0	0	0	0.6223	0	0	0.334
1.1334	249.123	0	0	0	0	0	0	0	0	0	0	0	0	0	0	0	0	0	0	0	0	0	0	0	0	0	0	0.149	0	0	0	0	0	0	0	0	0	0.2919	0	0	0	0	0	0	0	0	0	0	0
0.5394	249.123	0	0	0	0	0	0	0	0	0	0	0.1284	0	0	0.0621	0	0	0	0	0.4763	0	0	0.5376	0.3524	0.4247	0	0.666	0	0.1099	0.0932	0.6314	0	0.0848	0	0.2931	0.4042	0	0	0	0.2116	0	0	0	0	0.2765	0	0	0	0.4151
1.7694	249.112	0	0	0	0	0	0	0	0.2071	0.2782	0.2773	0	0.3812	0.3284	0.4239	0.4504	0.3443	0.1277	0.3246	0	0.2739	0.26	0.1499	0.3668	0.2605	0.3063	0.4266	0.243	0.2524	0	0.2993	0.1761	0.2373	0.2605	0.4338	0.6965	0	0.265	0.783	0	0	0.6852	0.5115	0.2893	0	0.4008	0.2968	0	0.2735
1.3132	249.107	0	0	0	0	0	0	0	0	0.2274	0	0.2668	0.2145	0.3376	0.1911	0	0	0	0	0	0.2274	0	0.2756	0	0	0.2666	0.1843	0	0	0	0	0	0.1084	0	0	0.0519	0	0	0.1115	0	0	0.0722	0	0	0	0	0.5924	0.4896	0
2.8248	249.097	0	0	0	2.0326	0	0	0	0	0	0.0182	0	0	0	0	0	0	0	0.0025	0	0	0	0	0	0.1313	0	0	0	0.6116	0.3738	0	0	0	0	0	0	0	0	0	0.0022	0	0	0	0	0	0	0	0	0
1.2112	249.073	0	0	0	0	0	0	0	0	0	0	0	0.1171	0	0.4751	0.1167	0	0	0	0.3628	0.1186	0	0.2166	0.1646	0.1085	0.1906	0.0888	0.1552	0	0.1486	0.1081	0.1158	0	0.1541	0	0.1831	0.2843	0.3267	0.1379	0.1734	0.1657	0.2058	0	0	0	0	0.1552	0	0
2.0121	249.069	0	0	0	0	0	0	0	0	0	0	0	0	0	0	0	0	0	0.3739	0.4027	0	0	0	0.3244	0	0	0	0.1536	0	0	0.0795	0.2101	0	0.4133	0	0	0	0	0	0.2185	0.4232	0	0	0	0	0	0	0	0
0.5464	249.055	0	0	0	0	0	0	0	3.1221	2.9746	3.0027	3.4344	3.2577	3.2002	3.4665	4.5332	6.5162	3.3434	3.6981	0.5787	2.8934	3.4021	0.3403	0.3819	0.9331	2.8118	0.8253	2.2751	5.9651	3.7181	4.2243	4.7166	3.6649	3.6956	0.3231	3.9574	4.8464	0.5672	2.1332	0.4827	6.3383	2.1925	4.3718	9.7516	0.6331	2.1608	0.3434	3.6498	0.9293
3.4476	249.05	5.3726	0	11.6188	0	0.2314	3.3859	0	0.2451	0.442	0	0	0	0	0	0.1764	0	0.3074	0	0	0	0	0	0	0.4834	0	0.2391	0	0.0087	0.0689	0	0	0.3015	0	0	0	0	0	0	0.2944	0	0	0.1957	0	0	0	0	0.5852	0
0.4086	248.98	0	0	0	0	0	0	0	0	0	0	0	0	0	0	0	0	0	0	0	0	0	0	0	0	0	0	0.0551	0	0	0	0	0	0	0	0	0.0593	0	0	0	0	0	0	0	0	0	0	0	0
1.5873	248.167	0	0	0	0	0	0	0	0.9941	0.8508	0.8098	0.8833	0.8415	0.7917	0.7201	1.0748	0.6268	0.9944	0.5957	1.3264	0.6804	0.3265	0.7377	0.7151	0.8846	0.4267	0.4784	0.8585	0.8345	1.4597	0.4814	0.5669	1.1631	0.8045	0.7076	0.4262	1.0355	1.1957	0.9253	1.0676	0.7535	0.6601	0.8241	0	1.062	0.7403	0	0	0.6159
2.883	248.145	0	0	0	0	0	0.2043	0	0	0	0	0	0	0.0037	0	0.0796	0	0.0093	0	0	0	0	0	0	0.1285	0	0.2033	0	0.0665	0	0	0	0	0	0	0	0.0359	0	0	0	0	0	0	0.011	0	0	0	0	0
0.5686	248.127	0	0	0	0	0	0	0	0	0	0	0	0	0	0	0	0	0	0	0	0	0	0	0.2414	0.0919	0	0	0	0	0	0	0	0	0	0.429	0	0	0	0	0	0	0	0	0	0	0	0	0	0
1.7382	248.127	0	0	0	0	0	0	0	0	0	0	0	0	0	0.2111	0.1144	0.2164	0.1589	0	0.2404	0.1421	0	0	0	0	0	0	0	0	0.1223	0.1869	0.1426	0	0	0.2102	0.178	0	0.215	0	0.1558	0	0	0	0	0	0	0	0	0
0.675	101.075	0	0	0	0	0	0	0	0	0	0	0	0	0	0	0.2531	0	0	0	0	0	0	0.2011	0	0	0	0.2138	0	0	0	0	0	0	0	0	0	0.1073	0	0	0	0	0	0	0	0	0	0	0	0
2.2756	101.07	0	0	0	0	0	0	0	3.6891	3.4907	3.2103	3.6049	3.3268	3.3859	4.3044	6.305	1.2933	3.7052	2.3927	2.8621	5.7255	3.0818	3.7107	4.3904	2.3276	3.7918	4.5476	3.7145	2.9327	1.3639	4.9269	1.9719	3.4319	2.9017	5.5704	0.6109	2.2068	3.7902	2.2316	3.7582	2.866	4.4999	4.2361	2.6946	3.8717	3.1323	2.0909	5.0705	4.6298
2.0047	101.07	0	0	0	0	0	0	0	0.2187	0.3055	0.2614	0.3209	0.3739	0.4432	0.4219	0.6361	0.7003	0.9224	0.1863	1.3978	0.2218	0	0.7905	0.4292	0.2128	0.5529	0	0.4272	0.8228	0.3916	0.2308	0.1361	0.7776	0.3414	0.4428	0.2847	0.6966	0.475	0.2874	0.4654	0.2168	0.2447	0.3304	0	0	0.1925	0.5662	0	0
1.6316	101.069	0	0	0	0	0	0	0	0	0	0	0	0	0.2228	0.2434	0.3572	0.2417	0	0.2342	0.2197	0.1608	0	0.738	0.1797	0.4145	0.2951	0.4215	0.158	0.2934	0.2032	0.2034	0.2937	0.2978	0.1392	0	0	0.2912	0.1124	0	0.3258	0.0691	0.2371	0	0	0	0	0.1949	0	0
2.4167	101.067	0	0	0	0	0	0	0	0	0	0	0	0	0	0	0	0	0	0	0	0.3194	0	0	0	0	0	0	0	0	0	0	0	0.1832	0	0	0	0	0	0	0	0	0	0	0	0	0	0	0	0
2.7364	101.063	0	2.1606	0	0.8778	0	0	0	0	0	0	0	0	0	0	0.34	0.3342	0.1102	0.1443	0.4631	0	0	0.5158	0.1244	0.2657	0.2514	0.4599	0.0916	0.1434	0.2847	0.3602	0.249	0.4129	0.3146	0	0.106	0.2505	0	0.3943	0.1584	0	0	0.0049	0	0	0	0	0	0
0.4532	101.06	0	0	0	0	0	0	0	0.2446	0.2732	0.2379	0	0.2308	0.2442	0	0.1269	0	0.1209	0	0.217	0	0	0.2327	0	0.1643	0	0.3831	0	0	0	0	0	0.3118	0	0.302	0.3473	0	0.2823	0	0	0.0912	0	0.4372	0	0	0.439	0	0	0.4608
2.5854	100.112	0	0	0	0	0	0	0	0	0	0	0	0	0	0	0.3779	0	0	0	0.3422	0	0.245	0	0.3368	0.0936	0.2805	1.5879	0	0.109	0	0.1975	0	0	0	0	0	0	0	0.1922	0	0	0	0	0	0	0	0	0	0
2.3631	100.111	0	0	0	0	0	0	0	0	0	0	0	0	0	0.1595	0	0	0	0	0	0	0	0	0	0	0	0	0	0	0.1263	0	0	0	0	0	0	0	0	0	0	0	0	0	0	0	0	0	0	0
1.4136	100.076	0	0	0	0	0	0	0	2.616	2.2848	2.1685	2.3434	2.0662	2.0812	2.2815	2.1157	1.0912	0.5577	1.3141	1.6389	0.0848	0.5941	2.8508	0.7375	0.3358	1.5281	1.9145	1.0723	5.8167	2.8727	0.7553	0.5954	5.0447	3.348	1.4402	0.5312	4.5468	0.7292	8.3015	5.3545	1.0843	1.4747	2.1809	0.9773	0.5825	1.3904	1.8022	0	0.5868
0.8183	100.076	0	0	0	0	0	0	0	0.9426	0.8072	2.6362	1.0309	2.739	2.7772	0	1.5308	1.3056	2.1385	2.064	3.2381	2.9442	0.6906	4.943	1.5673	1.6894	3.2779	5.1875	0.8447	0.5247	1.564	3.0473	1.4914	0.6179	0.9225	1.5169	1.6048	2.6817	2.2028	1.3152	4.4591	1.0378	2.2469	0.7126	1.1043	1.4376	1.9924	3.0803	0.7735	0.8462
2.0626	100.076	0	0	0	0	0	0	0	1.003	1.0605	0	1.1302	1.2557	0.2998	2.9148	1.0378	1.714	1.2393	1.2606	4.2455	1.7405	1.9515	1.869	2.9224	1.3335	1.4955	3.3946	1.1986	2.3589	1.1584	2.4147	1.2071	0.8205	2.7471	2.7467	1.3001	0.8944	1.2253	2.4766	1.157	1.9212	1.8373	0.7721	0.2412	0	0.8168	0.3416	0	0.5673
0.631	100.076	0	0	0	0	0	0	0	0.5131	0.5603	0.7616	0.5441	0.707	0.8552	7.9688	0.3043	4.8649	1.5015	0.3895	0.3771	0.3863	2.1633	2.9998	0.4503	0.2198	0.5249	1.2083	0.1478	0.1195	0.2044	1.6358	0.2054	0.143	0.0921	3.3137	3.2475	0.7185	0.9015	4.8393	2.4429	0.0936	7.0825	0.1323	2.6403	0.2702	0.5244	0	0.4791	1.739
3.4816	100.076	0	0.9216	0	0	0	0	0	0.2771	0.2591	0	0.2404	0.2424	0.2293	0.3823	0.0973	0.0605	0.2476	0.103	0.3802	0	0	0.0838	0.265	0.2022	0.1978	0	0.2709	0.2795	0.2127	0.2428	0	0.314	0.2386	0.2625	0	0	0.3691	0.3144	0.4199	0.1922	0.2113	0	0	0.4161	0	0.4062	0	0
1.1841	100.076	0	0	0	0	0	0	0	1.277	0.8673	1.0978	0.8243	1.0425	1.0915	3.3084	0.8081	0.6066	0.6477	1.7311	0.3948	0.1456	0	2.711	1.3186	0.6094	0.8931	2.2895	0.349	0.6332	0.5617	1.5475	0.9404	0	0.5605	4.1083	0	0.4076	3.7103	0.4717	0.9988	0.3517	4.0198	0	0.4824	0.7965	1.4599	0	0	0.4199
1.6727	100.051	0	0	0	0	0	0	0	2.4141	2.0247	1.8135	1.9413	1.6606	1.5592	2.0846	0.9467	1.3814	1.6532	1.0451	1.948	1.3556	1.2702	1.6422	1.5706	1.1783	1.9512	2.837	1.1787	0.7523	1.2597	1.6973	0.8842	1.0653	1.2915	1.9948	1.1512	1.2544	2.1913	1.6332	1.5942	0.7623	1.8042	0.8515	1.4089	2.6692	1.2098	1.9799	1.3311	1.4332
3.0906	903.566	0	0	0	0	0	0	1.5517	0.1757	0.1961	0.1462	0	0.201	0	0	0.1239	0.0735	0.1126	0.0874	0.2422	0	0.0684	0.14	0.1419	0.0713	0.141	0.1467	0	0.0847	0.0777	0.0955	0.0723	0.1482	0.151	0	0.1072	0	0.189	0.1575	0.0095	0.064	0.1651	0.0658	0	0.2162	0.1693	0	0.2005	0
1.0737	903.247	0	0	0	0	0	0	0	0	0	0	0	0	0	0	0	0	0.0924	0	0	0	0	0	0	0	0	0	0	0.087	0	0	0	0	0	0	0	0	0	0	0	0	0	0	0	0	0	0	0	0
1.8686	902.814	0	0	0	0	0	0	0	0.4152	0	0	0	0	0	0	0.3356	0	0	0	0	0	0	0	0	0	0	0	0	0	0	0	0	0	0	0	0	0	0	0	0	0	0	0	0	0	0	0	0	0
0.6392	902.81	0	0	0	0	0	0	0	0.3459	0	0	0	0	0	0.4042	0.1797	0.2718	0.1546	0	0	0	0	0	0	0	0	0	0	0	0	0	0	0	0	0	0	0	0	0	0	0	0	0	0	0	0	0	0	0
0.4035	902.81	42.241	0	0	0	0	0	0	0	0	0	0	0	0	0.5009	0.1783	0.1184	0	0.1176	0	0	0	0.162	0	0.1945	0	0	0	0	0	0	0	0	0	0	0	0	0.3701	0	0	0	0	0	0	0	0	0	0	0
0.5485	901.69	0	0	0	0	0	0	0	0	0	0	0	0	0	0	0	0	0	0	0	0	0	0	0	0	0	0	0	0.0294	0	0.0872	0	0	0	0	0.1017	0	0	0	0	0	0	0	0	0	0	0	0	0
0.558	901.198	0	0	0	0	0	0	0	0	0	0	0	0	0	0	0.1491	0.1618	0.0646	0.1009	0	0.0587	0.0571	0	0	0	0	0	0	0.3692	0.1526	0.14	0.2522	0.0882	0.1198	0	0.1257	0.2461	0	0	0	0.397	0	0	0.2294	0	0	0	0	0
0.5044	900.135	0	0	0	0	0	0	0	0	0	0	0	0	0	0	0	0.3449	0.1597	0	0	0	0	0	0	0	0	0	0.1121	0.0687	0	0	0	0	0	0	0	0	0	0	0	0	0	0	0	0	0	0	0	0
0.4341	898.672	0	0	0	0	0	0	0	0	0	0	0	0	0	0	0	0	0	0	0	0	0.0661	0	0	0	0	0	0	0	0	0	0	0	0	0	0	0	0	0.0984	0.1318	0	0	0	0	0	0	0	0	0
3.0845	898.552	0	0	0	0	0.2299	0	0.7924	0.2942	0.2149	0	0.1524	0	0	0	0.1407	0	0.1155	0	0	0.0805	0	0.1386	0	0	0.1772	0.0731	0	0	0.0877	0	0.0064	0	0	0	0	0	0	0	0.1675	0.0702	0	0.2566	0.1802	0	0	0	0	0.0863
3.0859	897.552	2.8367	0.5921	0.1274	0	0	0	0	0.2056	0.3271	0.2209	0.1713	0.2492	0.085	0.092	0.2484	0.0471	0.0747	0.1414	0	0	0.0907	0.256	0.1958	0	0.3081	0.1177	0.1141	0.0131	0.0818	0.0751	0	0	0.0332	0.1489	0.0297	0	0	0.2327	0.1879	0.1409	0	0.4044	0.1837	0.4109	0.2246	0.1874	0.1516	0.3015
3.0799	896.56	0	0	0	0	0	0	0	0.1983	0	0.0648	0.1358	0	0.0152	0.2352	0	0	0.0889	0	0	0	0	0.1284	0.0912	0.1018	0.1336	0.091	0	0	0	0	0.0428	0.1073	0	0	0	0	0.1805	0	0	0	0.0856	0.2335	0.1419	0	0	0	0.1468	0
0.5448	896.203	0	0	0	0	0	0	0	0	0	0	0	0	0	0	0.0496	0.0708	0	0	0	0	0	0	0	0	0	0	0	0.0691	0	0	0.0674	0	0.0509	0	0	0	0	0	0	0.0848	0	0	0	0	0	0	0	0
0.4769	894.628	0	0	0	0	0	0	0	0	0	0	0	0	0	0	0	0	0	0	0	0	0	0	0	0	0	0	0.0568	0	0	0	0	0.0814	0	0	0	0	0	0.1274	0	0	0	0	0	0	0	0	0	0
0.5425	894.189	0	0	0	0	0	0	0	0	0	0	0	0	0	0	0	0	0.0519	0	0	0	0	0	0	0	0	0	0	0.0466	0.0605	0	0	0	0.0636	0	0	0	0	0	0	0.1082	0	0	0	0	0	0	0	0
0.554	893.189	0	0	0	0	0	0	0	0	0	0	0	0	0	0	0	0	0	0	0	0	0	0	0	0	0	0	0	0	0	0.078	0	0	0	0	0.0478	0	0	0	0	0	0	0	0	0	0	0	0	0
1.2521	403.195	0	0	0	0	0	0	0	0	0	0	0	0	0	0	0.2527	0	0	0	0	0	0	0	0	0	0	0	0	0	0	0	0	0	0	0.0473	0	0	0	0	0	0	0	0.4267	0	0	0	0.3354	0	0
2.8161	403.193	0	0	0	0	21.0299	0	0	0.1211	0	0	0	0	0	0.034	0.0075	0	0	0	0	0	0	0	0	0	0	0	0	0	0	0	0	0	0	0	0.2294	0	0	0	0.0046	0.0533	0	0	0	0	0	0	0	0
0.981	403.19	0	0	0	0	0	0	0	0	0.2916	0	0	0	0	0	0	0.5134	0	0	0.6245	0.3745	0.5664	0	0	0	0	0.2783	0.2769	0	0	0.2297	0.2354	0.2144	0	0	0	0	0	0.3222	0	0	0	0	0	0.6099	0	0	0	0.8226
3.236	403.172	0	0	0	0	0	0.0143	1.4429	0	0.7813	0	0.0973	0	0	0.1022	0	0	0.0528	0	0.7166	0.0937	0	0	0.5357	0.2753	0	0	0.0511	0.0645	0.2862	0	0.3423	0	0.0733	0.0472	0.1964	0.2291	0	0.3553	0	0.3278	0.868	0.0395	0	0	0.2791	0.7786	0	0.769
0.7743	402.356	0	0	0	0	0	0	0	0.6865	0.5984	0.3281	0	0.1995	0	0.6944	0.4195	0.4392	0.3496	0.4495	0.1246	0.3202	0.398	0.5567	0.4082	0.249	0.4478	0.4397	0.2651	0.1513	0.1772	0.222	0.1747	0.2014	0.2494	0.2956	0.1824	0	0.3034	0.2834	0	0.1346	0.4146	0	0	0	0.1833	0	0	0
0.8187	402.299	0	0	0	0	0	0	0	0	0	0	0	0	0	0	0	0	0	0	0	0	0	0	0	0	0.4463	0	0.4214	0.1563	0	0	0	0	0	0	0.1137	0	0	0	0	0	0	0	0	0	0	0	0	0
2.6312	402.284	0	0	0	0	0	0	0	0	0.0128	0.0193	0	0	0	0	0	0	0	0.1426	0	0	0	0.2691	0.0119	0	0	0	0	0	0	0	0	0	0	0	0.0912	0	0	0.0315	0	0	0.0006	0	0.1365	0	0	0	0	0
2.3658	402.284	0	0	0	0	0	0	0	0.9862	0.6738	0	0	0	0	1.0437	2.4044	0.8594	0.5054	0	6.4438	0.6136	0.3233	1.6341	2.0752	0	0.8459	0	0	0	0	1.3451	0.778	0.9024	1.2007	1.8189	0.927	0.3816	2.8782	2.8215	1.4226	0.4809	0	0	0	0	0.5165	1.026	0	0
2.1379	402.284	0	0	0	0	0	0	0	2.1659	1.9818	1.7764	2.2103	0.1895	1.9999	0.2996	3.3037	1.8951	1.065	1.9033	2.8504	0	1.1377	4.314	3.357	2.1297	2.012	3.0747	3.9518	2.118	2.6543	3.6118	3.3661	3.6966	5.4488	6.8985	2.295	3.6128	5.8436	2.7743	3.5343	2.6665	2.3254	1.4687	0.9378	0.8493	1.7615	2.4513	0	0.8707
0.5681	402.245	0	0	0	0	0	0	0	0	0	0	0	0	0	0	0.1317	0	0	0	0	0	0	0	0	0	0	0	0	0	0	0	0	0	0	0	0.1843	0	0	0	0	0	0	0	0.145	0	0.2475	0	0	0
2.2312	402.234	0	0	0	0	0	0	0	16.8565	15.7611	15.4704	16.2913	15.7742	15.9821	22.1645	5.6239	8.1995	13.9282	90.7282	14.6807	4.3528	8.6813	32.274	46.0981	34.6391	24.821	23.6895	113.979	8.3883	33.1502	36.438	23.9691	5.203	26.8286	33.9042	10.3341	8.5957	20.2885	5.0963	34.7083	15.4989	2.7826	0	1.7551	4.3198	34.096	4.5052	2.5163	1.9857
2.4242	402.233	0	0	0	0	0	0	0	0	0	0	0	0	0	0	0	0	0.1191	0	0	0	0	0.2424	0.3524	0.3673	0	0.216	0	0	0	0.3302	0.2226	0	0.2385	0	0	0	0	0	0.2522	0.2704	0	0	0	0	0.3498	0	0	0
0.4654	402.16	0	0	0	0	0	0	0	0	0	0	0	0	0	0.0853	0	0	0	0	0	0.0958	0	0	0	0.217	0	0	0	0	0	0	0	0	0	0.1164	0	0	0	0	0	0.048	0	0	0	0	0	0	0	0
3.0991	402.097	0	5.206	0	0	0	0	0	0.2094	0.1417	0.8032	0	0	0	0	0.2018	0.1755	0	0	0	0	0.4218	0.0866	0.5054	0	0.0343	0	0.2098	0	0	0	0	0.0119	0	0	0	0	0	0.0161	0	0	0	0.4703	0	0	0	0.3104	0	0.6919
3.2729	402.095	0	0	5.0005	0	0	0	0	0	0	0	0	0	0	0	0	0	0.2031	0.0002	0	0	0	0	0	0.5364	0	0	0	0	0	0	0	0	0	0	0	0	0	0	0	0	0	0	0	0	0	0	0	0
0.4618	402.076	0	0	0	0	0	0	0	0	0	0	0	0	0	0.0935	0.0805	0	0	0	0	0	0	0	0	0.1057	0	0.2392	0	0	0.2596	0.2109	0.1314	0.1493	0	0	0.0911	0	0	0.1175	0	0	0	0	0	0	0	0	0	0
0.6602	250.961	0	0	0	0	0	0	0	0	0	0	0	0.1213	0	0	0	0	0	0	0	0	0	0	0.4192	0	0	0	0	0	0	0	0	0	0	0	0	0	0.3272	0	0	0	0	0	0	0	0	0	0	0
3.1331	250.884	0.156	0	0	0	0	0	0.2781	0.0783	0	0	0	0	0	0.5157	0	0	0.262	0	0	0.1349	0	0	0.2724	0	0	0	0	0	0	0.2602	0	0	0	0	0	0	0	0	0	0	0	0	0	0	0	0	0	0
1.1326	250.18	0	0	0	0	0	0	0	0.2127	0.3013	0.4361	0.3196	0.2536	0.3202	0.9626	0	0	0	0	0	0	0	1.8421	0	0	0.1025	2.5304	0	0.5033	0	3.2058	0	0	0	0	0.3482	0	0	0	0	0	0.6768	0	0	0	0	0	0	0
0.4614	250.176	0	0	0	0	0	0	0	0	0	0	0	0	0	0	0	0	0	0	0	0	0	0	0	0	0	0	0	0	0	0	0	0	0	0	0	0	0	0	0	0	0	0	0	0	0	0.4738	0	0
0.6341	250.175	0	0	0	0	0	0	0	0	0	0	0	0	0	0	0	0	0	0	0	0	0	0	0	0	0	0	0	0	0	0	0	0	0	0	0	0	0	0.2612	0	0	0	0	0	0.5917	0	1.3107	0	0
1.7527	250.143	0	0	0	0	0	0	0	0.1691	0	0	0	0	0	0	0	0.5323	0	0.2607	0	0	0	0.1633	0.4141	0	0	0	0	0.1929	0	0	0	0	0	0	0	0	0	0	0	0	0	0	0	0	0	0	0	0
2.3722	250.141	0	0	0	0	0	0	0	0	0	0	0	0	0	0	0	0	0	0	0.4344	0	0	0	0	0	0	0	0	0	0.1077	0	0	0	0	0.3061	0	0	0	0	0	0	0	0	0	0	0	0	0	0
1.4465	250.115	0	0	0	0	0	0	0	0	0	0	0	0	0	0	0	0	0	0	0	0	0.2368	0	0	0	0	0	0	0.1304	0	0	0.1652	0	0	0	0	0	0	0	0	0	0	0	0	0	0	0	0	0
0.5825	250.108	0	0	0	0	0	0	0	0	0	0	0	0	0	0	0	0	0	0	0	0	0	0	0	0	0	0	0.105	0	0	0	0	0	0	0	0	0	0	0	0	0	0	0	0	0	0	0	0	0
1.9734	250.108	0	0	0	0	0	0	0	0.2541	0.1969	0.2351	0	0.2943	0	0.3445	0.2619	0.3374	0.2629	0.1847	0.7171	0.5443	0.2611	0.3676	0.4177	0.3275	0.2215	0.3073	0.0685	0.4406	0.1936	0	0.357	0.3762	0.2572	0	0.1664	0.276	0.1069	0.2584	0.5463	0.3761	0.4685	0	0.1683	0.41	0	0.6045	0.254	0
0.7883	250.094	0	0	0	0	0	0	0	1.9464	1.5979	1.5148	1.664	1.3696	1.4096	1.0766	2.9149	2.5917	1.4752	2.1483	1.0289	2.1853	0.9659	1.6444	0.4878	0.4212	1.4207	0.7157	2.4742	0.5866	1.1206	0.7115	1.0865	2.055	1.4735	1.4004	2.6291	0.766	6.2213	1.4881	1.1243	0.9946	1.8322	1.9946	1.797	1.8679	1.9427	2.4426	1.8857	1.8006
2.5792	250.077	0	0	0	0	0	0	0	0	0	0	0	0	0	0	0	0.1148	0	0	0	0.1595	0	0	0.3415	0	0	0.2184	0	0.095	0	0.2127	0	0.1862	0.1808	0	0	0	0	0	0	0	0	0	0	0	0	0	0	0
1.225	250.047	0	0	0	0	0	0	0	0	0	0	0	0	0	0	0.0988	0	0	0	0	0	0	0	0.0957	0	0	0	0	0	0	0	0	0	0	0.1339	0	0	0	0	0	0	0.1152	0.2603	0	0	0	0	0	0
2.1324	250.042	0	0	0	0	0	0	0	0	0	0	0	0	0	0	0.2792	0	0.2664	0	0	0	0.2291	0	0	0	0	0	0	0	0	0	0	0	0	0	0	0	0	0	0	0	0	0	0	0	0	0	0	0
1.6771	249.194	0	0	0	0	0	0	0	0	0	0	0	0	0	0	0	0	0	0.0994	0	0	0.1442	0.2541	0	0	0	0	0	0	0	0	0	0	0.823	1.1203	0	0	0	0	0	0.1917	0	0	0	0	0	0	0	0
0.4798	249.156	0	0	0	0	0	0	0	0	0	0	0	0	0	0	0.3974	0	0	0	0	0	0	0.2246	0	0.1963	0	0.1631	0	0	0	0	0	0	0	0	0.179	0	0	0	0	0	0	0	0	0	0.4128	0	0	0
1.1017	103.956	0	0	0	38.7305	0	43.7479	0	0	0.5441	2.8057	2.4032	0	2.2584	0.7561	1.4678	0.9557	3.025	2.8599	0	3.2515	4.3256	1.6864	1.127	1.9504	0	3.5314	0	0	0.616	0	0.3277	1.7897	1.8485	3.879	0.902	0.6448	0.281	1.5215	0	0.7721	4.4592	3.3832	0	3.6005	0	1.0383	2.1298	0
1.9197	103.124	0	0	0	0	0	0	0	0	0	0	0	0	0	0.1204	0	0	0	0	0	0	0	0	0	0	0	0	0	0	0	0	0	0	0	0.1452	0	0	0	0	0	0	0.3043	0	0	0	0	0	0	0
1.5097	103.058	0	0	0	0	0	0	0	0	0	0	0	0	0	0	0	0	0	0.1169	0	0	0.223	0	0	1.4113	0.2204	0	0.1939	0.0973	1.7226	0	0.2262	0.1257	0	0	0	0.2904	0	0.1665	0	1.2426	0	0	0	0	0	0	0	0
0.7015	103.056	0	0	0	0	0	0	0	0	0	0	0	0	0	0	0	0	0.1445	0.158	0	0	0	0	0	0	0	0.281	0	0	0.1045	0	0	0	0	0	0	0.1361	0	0	0	0	0	0	0	0	0	0	0	0
1.7763	103.054	0	0	0	0	0	0	0	0.3248	0.2924	0.2463	0.291	0.2801	0.2303	0.3411	0.2439	0.2873	0	0.3046	0.4705	0.3193	0.3428	0.4269	0.3111	0.2212	0.3244	0.3756	0.3864	0.2278	0.2978	0.3042	0.2024	0.3347	0.4229	0.199	0.3972	0.4666	0.7195	0.5625	0.3754	0.2628	0.2698	0.2242	0.2779	0	0.2551	0.4119	0	0.1739
1.2163	103.054	0	0	0	0	0	0	0	0.6026	0.642	0.5535	0.5611	0.4512	0.526	1.3283	1.6979	0.274	0.7205	0.3228	0.7976	0.8465	0.2456	1.0054	1.1531	0.3998	0.346	0.411	0.4422	1.7331	0.2449	0.6474	0.5488	0.3362	0.5971	1.4003	0.176	0.1057	0.6052	0.2784	0.3346	0.3419	0.7676	1.2885	0	0.5841	0.3105	0.6088	0.5932	0.4611
0.4461	103.053	0	0	0	0	0	0	0	0.1718	0.228	0.1679	0.2196	0.2313	0	0.1659	0.3207	0.3019	0.2595	0.2298	0.3458	0.225	0	0	0	0.2229	0.1617	0.7788	0.1495	0.1593	0.3474	0.2588	0.1687	0	0.1757	0.2771	0.3472	0.3873	0	0.1486	0	0.204	0.2913	0.2344	0	0.4281	0.1866	0.3839	0.2737	0
2.6465	103.042	2.0846	0	0	0	0	0	0	0	0	0	0	0	0	0	0.2361	0	0.1087	0.2732	0	0	0	0.155	0.2384	0.1511	0.2002	0.1087	0.259	0.0905	0.2034	0.1289	0	0.2164	0.1432	0	0.0093	0	0	0	0.1757	0.0798	0	0	0	0	0.1	0	0	0
2.286	103.039	0	0	0	0	0	0	0	0	0	0	0	0	0	0	0	0	0	10.7238	0	0	0	0	0	0	0	0	0	0	0	0	0	0	0	0	0	0	0	0	0	0	0	0	0	0	4.8515	0	0	0
2.4408	103.038	0	0	0	0	0	0	0	0.605	0.6507	0.6025	0.6777	0.7344	0.7514	0.6991	0.8267	0.288	1.8433	2.9781	1.011	0.6049	1.1243	1.6557	1.9154	1.0823	1.4371	0.8506	2.162	1.0185	1.5652	4.0829	0.7395	1.0072	0.8585	3.7912	0.4388	0.9894	0.6872	0.195	1.2176	0.6077	0.6903	0.5648	0	1.0738	1.5765	0.3948	0	0.6397
1.0721	102.128	0	0	0	0	0	0	0	0.6698	0.5834	0.6211	0.6432	0.5944	0.6169	0	0	0	0.061	0	15.2937	0	0	0	0	8.3082	0	0	0	0	0	0	0	0	0	0	0.0674	0	0	0	0	0	0	0	0	0	0	0	0	0
2.6604	102.09	0	0	0	0	0	0	0	0	0	0	0	0	0	0.2886	0.3195	0	0.439	0.3488	0.0068	0	0	0	0	0.2967	0	0.58	0.871	0.2525	0	0.303	0.6959	0.3533	0.2655	0.5122	0	0	0	0	0.2532	0	0.3364	0	0	0	0.3751	0	0	0
1.7488	102.068	0	0	0	0	0	0	0	0.1206	0	0.1264	0	0	0	0.1614	0.233	0.184	0.1357	0	0.2188	0	0.1741	0.1096	0.1436	0	0.1668	0.3081	0	0.099	0.0947	0.1028	0.1926	0	0.1169	0.1512	0	0.0806	0	0	0.1109	0	0.1385	0	0	0	0	0	0	0
1.5355	102.066	0	0	0	0	0	0	0	0	0	0	0	0	0	0.5251	0.0916	0	0	0	0	0.2975	0	0.4243	0.4415	0.1324	0	0	0	0.1626	0	0.4873	0.1021	0	0.3265	0.4653	0.1245	0	0	0	0	0	0.2081	0	0	0	0	0	0	0
3.4262	102.055	0	0	0	0	0	0	0	1.324	1.1247	1.0404	1.2118	1.0273	1.021	0	0.5696	0.8038	0.9881	0.7795	1.1978	1.2041	1.2828	1.4	0.743	0.6257	0.2301	0.8464	0.3973	0.3147	0.3087	0.4392	1.0821	0.382	0.9895	0.0857	0.7366	0.8852	1.0493	1.0448	0.4829	0.9281	1.0535	0.6176	1.0208	1.9532	1.0062	2.4809	1.505	1.8241
1.1567	102.055	0	0	0	0	0	0	0	0	0	0	0	0	0	0.3129	0.2926	0.296	0	0	0	0.1285	0	0.3848	0	0	0	0.3568	0.2577	0.1494	0.2037	0.2811	0.1484	0.1883	0	0	0	0	0	0.2304	0	0	0	0	0	0	0	0	0	0
2.059	910.069	0	0	0	0	0	0	0	0.1841	0	0.1916	0	0.3034	0.1961	0.148	0	0.3265	0.4081	0.3777	0.2864	0	0.0585	0	0.2632	0	0.4324	0	0	0	0	0	0	0.2298	0	0.3645	0.1795	0	0	0.2254	0	0	0.3284	0.418	0.1866	0.1247	0.309	0	0	0
2.0613	909.405	0	0	0	0	0	0	0	0	0.1593	0	0	0.2227	0.2879	0.2235	0.1757	0.3941	0.3138	0.167	0.1224	0.2553	0.3579	0.2066	0.2861	0	0.1282	0.4339	0.0309	0.1424	0.0492	0.1695	0.126	0.1814	0.3693	0.5763	0.1098	0.2186	0.5585	0.5581	0.2658	0	0.5821	0	0.2198	0.6294	0	0.2274	0	0.6282
1.7479	909.251	0	0	0	0	0	0	0	0	0	0	0	0	0	0	0	0	0	0	0	0	0	0	0	0.116	0	0	0	0	0.0612	0	0	0	0	0	0	0	0	0	0	0	0	0	0	0	0	0	0	0
2.055	908.74	0	0	0	0	0	0	0	0.1828	0	0.1018	0	0	0	0	0	0	0	0.2734	0	0	0.1383	0.1898	0.1029	0	0.4741	0.2832	0.2777	0	0	0	0.1772	0	0.0886	0.2237	0	0	0	0.1915	0	0.0614	0.4011	0	0.2023	0.3168	0.476	0	0	0.5112
0.4805	908.653	0	0	0	0	0	0	0	0	0	0	0	0	0	0	0	0	0	0	0	0.0544	0	0	0	0	0	0	0	0	0	0	0	0.1033	0	0	0	0.0692	0	0.2718	0	0	0	0	0	0	0	0	0	0
0.5647	908.193	0	0	0	0	0	0	0	0	0	0	0	0	0	0	0	0	0	0	0	0	0	0	0	0	0	0	0	0.0685	0	0	0.0385	0	0	0	0	0	0	0	0	0	0	0	0	0	0	0	0	0
2.0622	908.075	0	0	0	0	0	0	0	0.2071	0	0.1361	0	0	0	0.2963	0.2277	0.2475	0.204	0.0857	0.3687	0.1201	0.2738	0.0565	0	0	0.0391	0.3316	0.2135	0.0996	0.0505	0	0.0451	0.1225	0.2652	0.2445	0.1549	0	0.3217	0.2162	0	0	0.443	0.3109	0	0.2891	0.27	0	0	0.4254
2.0617	907.41	0	0	0	0	0	0	0	0	0.1642	0	0.1423	0.1712	0.1401	0.2109	0.1032	0.2161	0.1993	0.1522	0.3295	0.1183	0.1977	0.0928	0.0915	0	0.1809	0.2496	0.225	0.0596	0	0.08	0.0679	0.143	0.1905	0.3583	0.1761	0.076	0.2476	0.253	0.1135	0	0.4299	0.183	0	0.4037	0.2984	0	0.1536	0.1715
2.0691	906.742	0	0	0	0	0	0	0	0	0	0	0	0	0	0	0.1292	0.1327	0.1261	0.142	0	0	0	0	0	0	0	0	0	0.0595	0	0	0	0.0824	0.1159	0	0.1103	0.0686	0.0805	0	0	0	0	0	0	0	0	0	0	0.1839
0.4464	906.666	0	0	0	0	0	0	0	0	0	0	0	0	0	0	0	0	0	0	0	0.0908	0	0	0	0	0	0	0.0821	0	0	0	0	0.1678	0	0	0.06	0	0	0.1462	0	0	0	0	0	0	0	0	0	0
3.0891	906.556	0	0	0	0	1.5618	0	0	0	0	0.1166	0	0	0	0.169	0	0	0	0	0	0	0.0164	0	0	0.0599	0	0	0.0925	0	0	0	0	0.0062	0	0.0765	0	0.0775	0	0	0	0	0	0.0978	0.1553	0.0604	0.0941	0	0	0.1696
0.408	906.256	0	0	0	0	0	0	0	0	0	0	0	0	0	0	0	0.0811	0	0	0	0	0	0	0	0.2583	0	0	0	0	0	0	0	0	0	0.0964	0	0.3652	0.094	0	0	0	0.3861	0	0	0	0	0	0	0
0.4318	905.675	0	0	0	0	0	0	0	0	0	0	0	0	0	0	0	0	0	0	0	0	0.0955	0	0	0	0	0	0	0	0	0	0	0	0	0	0	0.049	0	0.0882	0.1276	0	0	0	0	0	0	0	0	0
3.0891	905.559	0	0	1.0218	0	0	0.3403	0	0	0.2433	0.1321	0	0.2083	0	0.177	0	0	0	0	0	0.276	0.2628	0.0681	0.175	0	0.1683	0.1718	0.0676	0	0	0	0	0.1462	0	0	0.191	0.0421	0	0.2869	0	0.0932	0	0.0785	0	0.1552	0	0	0.2792	0.3093
1.5469	905.221	0	0	0	0	0	0	0	0	0	0	0	0	0	0	0	0	0	0	0	0	0	0	0	0.2206	0	0	0	0	0.6331	0	0	0	0	0	0	0.1393	0	0	0	0.5398	0	0	0	0	0	0	0	0
3.0881	904.562	0	0	0	0	0	0	1.2404	0.3552	0.2628	0.299	0.1202	0	0.3715	0.1965	0.1067	0.2849	0.2021	0.1473	0.3486	0	0.2581	0.277	0.2091	0.1814	0.076	0.3606	0.1198	0.0691	0.1204	0.228	0.1838	0.2242	0.2815	0.219	0.2046	0.2307	0	0.3491	0.2188	0.1164	0.311	0.2476	0.0909	0.2157	0.2742	0	0.2861	0.5553
1.4336	406.197	0	0	0	0	0	0	0	0	0	0	0	0	0	0	0	0	0.2051	0	0.4809	0.2229	0	0	0.177	0	0.0937	0.1365	0	0.0943	0	0	0.1076	0	0	0	0	0.1134	0	0	0.1308	0.0765	0.2231	0	0	0	0	0	0	0
0.7371	406.186	0	0	0	0	0	0	0	0.1591	0.1225	0	0.1322	0.1514	0.1607	1.03	0.1995	0	0.1014	0.1027	0	0.4327	0	0	0.1862	0.152	0	0	0	0.3135	0.1386	0	0	0	0.1408	2.8242	0.1115	0	0	0	0.26	0.0718	0.1533	0	0	0	0	0	0	0
2.5722	406.177	0	0	0	0	0	0	0	0	0	0	0	0	0	0	0	0	0	0	0	0	0	0	0	0.1791	0	0	0	0	0.3311	0	0	0	0	0	0	0	0	0	0	0	0	0	0	0	0	0	0	0
1.4209	406.104	0	0	0	0	0	0	0	0.1271	0	0	0.1841	0.1327	0.1341	0	0	0	0	0	0	0	0	0	0	2.8033	0	0	0	0	0.5905	0	0.0811	0.0968	0	0	0	0	0	0.2082	0	0.1554	0	0	0	0	0	0	0	0
2.9435	405.33	0	0.3668	2.9577	1.8023	0	0	0	0	0	0.0882	0.2418	0	0.1898	0	0	0	0	0	0	0.1048	0	0	0	0	0	0	0	0	0	0	0	0	0	0.3733	0	0	0	0.3399	0	0	0	0	0	0	0.2087	0.2315	0	0
0.5963	405.263	0	0	0	0	0	0	0	0.1084	0.1427	0	0.1465	0	0.2252	0.1907	0	0.2285	0.0961	0.3425	0.2852	0.1868	0.1032	0.1575	0	0	0.2306	0.158	0.1868	0	0.1408	0.1609	0.1023	0.1397	0.2386	0.3898	0.1901	0.0732	0.4494	0.1329	0.1181	0.0731	0.236	0	0	0	0.2612	0	0	0.2478
1.2014	405.209	0	0	0	0	0	0	0	0	0	0	0	0	0	0	0	0	0	0	0	0	0	0	0	0	0	0.2557	0	0.2261	0	0	0	0	0	0	0	0	0	0	0	0	0	0	0	0	0	0	0	0
2.945	405.173	0	0	0	0	0	0	1.0019	0	0.0388	0	0	0	0	0	0	0	0	0	0	0	0.3865	0	0	0.0571	0	0.0419	0	0.1654	0	0.2431	0	0	0	0	0	0	0	0	0	0	0	0	0	0	0	0	0	0
0.443	405.036	0	0	0	0	0	0	0	0	0	0	0	0	0	0	0	0	0	0	0	0	0	0	0	0	0	0	0	0	0	0	0	0	0	0	0.0515	0	0	0	0.0626	0	0	0	0	0	0	0	0	0
0.4517	404.336	0	0	0	0	0	0	0	0	0	0	0	0	0	0	0	0	0	0	0	0	0	0	0	0	0	0	0	0	0	0	0	0	0	0	0	0	0	0	0	0	0	0.1579	0	0	0	0	0.1475	0
0.9469	404.315	0	0	0	0	0	0	0	0	0	0	0	0	0	0	0	0	0	0	0	0.1659	0	0	0	0	0.2143	0	0	0	0	0	0	0	0	0	0	0	0	0	0	0	0	0	0	0	0	0	0	0
2.5929	404.299	0	0	0	0	0	0	0	0	0	0	0	0	0	0	0.5597	0	0	0.2066	0.7425	0	0	0.5593	0	0	0.1845	0	0.1246	0.1318	0.2185	0.3008	0.1855	0.2158	0.3176	0.5042	0	0.2108	0	0.3116	0.2626	0	0	0	0	0	0	0	0	0
0.517	404.278	0	0	0	0	0	0	0	0.1244	0	0	0	0	0	0	0	0	0	0	0	0	0	0.09	0	0	0	0	0	0	0	0	0	0	0	0	0	0	0	0	0	0	0	0	0	0	0	0	0	0
1.8801	404.264	0	0	0	0	0	0	0	0	0.2544	0	0	0	0	0.0642	0.1896	0.1687	0.1233	0	0.1766	0.1804	0.1478	0	0.1642	0	0	0.3197	0.0598	0.1247	0	0.181	0	0.1338	0.0573	0.2146	0.1364	0	0.2723	0.1736	0.0686	0.1374	0	0	0	0	0	0	0	0
0.4474	403.305	0	0	0	0	0	0	0	0.153	0.3374	0.1853	0.1761	0	0	0.3096	0.1994	0.1949	0.1795	0.233	0.2504	0.1268	0.1258	0.2278	0.1809	0.0994	0.1413	0.2106	0.1092	0.0692	0.0855	0.0873	0.0778	0.0854	0.096	0.1582	0.1333	0.1021	0.0956	0	0.1006	0.079	0.1282	0	0.1285	0	0	0.182	0.1943	0
0.6525	403.228	0	0	0	0	0	0	0	0	0	0	0	0	0	0	0	0	0	0	0	0	0	0.1754	0	0	0.2235	0.1867	0.125	0	0.1304	0	0	0	0	0	0	0	0.2441	0	0	0.0661	0	0	0	0	0	0	0	0
1.0894	251.139	0	0	0	0	0	0	0	0.2463	0	0.256	0.57	0	0	0.5977	0.1562	0.1732	0.1683	0.1991	0.2639	0	0	0.4281	0.3118	0.1558	0.3128	0.4776	0.2666	0.0963	0.0664	0.0984	0.2206	0.1642	0.242	0.28	0.2534	0.191	0.3407	0.3071	0.1637	0.2921	0.2316	0.2789	0.1289	0	0.3512	0.2902	0.2438	0.5108
2.4411	251.136	0	0	0	0	0	0	0	0	0	0	0	0	0	0	0.2666	0	0	0	0.1608	0	0.1215	0	0.3618	0.2524	0.5459	0.18	0.0845	0	0	0.4389	0.0455	0	0	0	0	0	0	0.4267	0.3668	0	0.2995	0	0	0	0	0	0	0
2.1334	251.131	0	0	0	0	0	0	0	0.4539	0	0	0	0	0	0.1603	0	0	0	0.1737	0	0	0	0.2625	0.1459	0	0.1244	0.8073	0.2896	0	0.5114	0.3947	0.1205	0.0899	0.3984	0.4115	0.0338	0.405	0.3566	0.4957	0.6679	0	0	0	0	0.6157	0	0	0.4765	0
0.5741	251.13	0	0	0	0	0	0	0	0.2701	0.9769	0.9293	0.8793	0.866	0.9109	0.4457	1.2042	0.2406	0	0.1359	2.0407	0	0	0.3914	0.4513	1.0562	0	0.5183	0.4046	0	0	0.3132	0	0	0.1162	0.2974	0	0	2.2604	1.1571	1.3231	0.1228	1.2596	0.7865	0.3362	0	0	0	0	1.4787
2.9079	251.128	0	0	0	0	8.2153	0	0	0.1971	0	0	0.3332	0.2284	0	0.1377	0	0	0	0	0	0	0.4667	0	0.2953	0	0.034	0	0.1959	0.1046	0	0	0.1687	0.4777	0	0.0475	0	0	0	0.4931	0.0175	0	0	0	0.3445	0	0.0285	0	0	0.2611
1.5697	251.127	0	0	0	20.9618	0	0	0	2.7874	3.0925	2.9825	2.94	2.8125	3.1168	4.3993	5.4183	3.7151	3.0095	2.0046	3.6563	3.1248	2.8971	4.5087	1.639	1.4438	3.609	2.7693	2.9563	2.415	2.3548	1.9953	2.4825	3.8172	2.2508	4.7344	2.3668	3.1374	3.5531	0.6424	2.9718	0.97	5.0187	2.2352	1.1764	1.9932	3.1218	3.6107	1.5583	3.0972
1.2951	251.124	0	40.7724	0	0	0	0	0	0	0	0.1135	0	0.2377	0	0	0	0.0935	0.028	0	0	0.0798	0	0.054	0	0	0	0	0.1678	0.0463	0	0	0	0	0	0	0	0	0	0.1845	0.2574	0	0	0.1271	0	0.6038	0.2685	0.1541	0	0.2855
1.9294	251.118	0	0	0	0	0	0	0	0.3178	0.242	0.1868	0.2485	0.3148	0.3353	0.6272	0.4252	0.3658	0.266	0.1721	0.566	0.3907	0.4045	0.2887	0.4118	0.2995	0.3373	0.42	0.325	0.3943	0.2011	0.3252	0.2606	0.1868	0.307	0.3408	0.2195	0.3464	0.2098	0.3749	0.4347	0.2569	0.5427	0.6725	0	0	0.1887	0.5704	0	0.2602
2.661	251.106	0	0	0	0	0	0	0.0684	0.2797	0	0	0.2953	0.2065	0.2467	0.6013	0.459	0.161	0.2397	0	0	0.2774	0.1627	0.2526	0.4719	0.1594	0.1814	0.2657	0.1878	0.1554	0	0.2926	0.1592	0.1992	0.2018	0.3217	0.4522	0.2255	0.7207	0	0.3414	0.1534	0.3912	0.1828	0	0	0	0	0.1587	0
0.6691	251.113	0	0	0	0	0	0	0	0.2361	0.4148	0.3921	0.1802	0.4627	0.6743	0.4608	0.2176	0.2329	0.1706	0.3887	0.322	0.1216	0.2445	0.3921	0.437	0.4244	0.3718	0.4392	0.2593	0	0.3967	0.8425	0.2529	0.119	0.2666	0.6905	0.1571	0	0.2919	0.7488	0.3161	0.7652	0.2165	0.1991	0	0.2608	0.2306	0.305	0	0.0289
0.9868	251.086	0	0	0	0	0	0	0	0.09	0.4042	0.4881	0.2287	0.166	0.2735	0.254	0.322	0.2348	0.4188	0.259	0.8323	0.2481	0.1691	0.2601	0.2161	0.2503	0.1774	0.4372	0.2333	0.3901	0.3966	3.6961	0.5872	0.217	0.4738	0.1949	0.249	0.3469	0.4982	0.6718	0.2585	0.141	0.3206	0	0	0.2112	0.109	0.2528	0	0
2.469	251.085	0	0	0	0	0	0	0	0.3891	0.2265	0	0	0	0	0.4109	0.1874	0	0	0.1559	0.2993	0	0	0.1686	0.0932	0	0.1997	0.1883	0.1776	0	0.1544	0	0	0	0	0.2478	0.1927	0.1979	0.2783	0.1494	0.1805	0	0	0	0	0	0	0	0	0
2.9601	251.076	0	0	0	0	0	0	0	0	0	0	0.0964	0	0	0	0.1065	0.108	0.1204	0	0.1836	0.1082	0.0561	0.1775	0.1503	0	0.2387	0.1824	0	0.0814	0.1065	0.1529	0.1002	0	0.1653	0.2251	0.1087	0.1255	0.236	0	0.1637	0.0946	0.1608	0.0957	0.1502	0	0	0	0.1094	0.1105
1.2052	251.049	0	0	0	0	0	0	0	0	0	0	0	0	0.5787	0	0	0	0.3085	0.2073	0	0	0.2824	0	0	0	0	0	0	0.2319	0.1622	0	0	0.2534	0	0	0	0	0	0.2303	0	0	0	0	0	0	0	0	0	0
3.1182	251.044	0	0.3987	0	3.8781	4.0495	0	0	0	0	0	0	0	0	0	0	0	0	0	0	0	0	0	0.8265	0.4988	0.3188	0	0	0.1049	0	0	0.3738	0	0	0	0	0.2784	0	0	0.4694	0.4262	0	0	0	0	0	0	0	0
0.4169	251.024	0	0	0	0	0	0	0	0	0	0	0	0	0	0	0	0	0	0	0	0	0	0	2.3978	0	0	0	0	0	0	0	0	0	0	0.2854	0	0	0	0	0	0	0	0	0	0	0	0	0	0
1.1905	104.107	0	0	0	0	0	0	0	0	0	0	0	0	0	0	0	0	0	0	0	0	0	0	0.323	0.3312	0	1.4936	0	0	0	0	0	0	0	0	0	0	0	0	3.5047	0	0	0	0	0	0	0	0	0
3.0055	104.082	0	0	0	0	0	0	0	0.9543	0	0	0	0	0	1.4306	0.8939	0	0	0	0	0.8972	0	0.942	0.6666	0.6483	1.1595	1.9316	0.8048	0.6256	0.9962	0	0.5648	0.8968	1.3176	1.2004	0.795	0	0	0	1.0033	0	0.9043	0	0	0	0	0	0	0
1.3877	104.07	0	0	0	0	0	0	0	0	0	0	0	0	0	0	0	0	0	0	0	0	0	0	0	0	0.3715	0.4535	0	0.1566	0	0.193	0	0	0	0	0	0	0	0	0.1208	0	0	0	0	0	0	0	0	0
0.9323	104.047	0	0	0	0	0	0	0	0	0	0	0	0	0	0	0	0	0.3262	0	0	0	0	0	0	0	0	0	0	0.8153	0.4971	0	0	0	0	0	0	0.434	0	0	0	0	0	0	0	0	0	0	0	0
0.9338	103.956	0	0	0	0	36.6563	0	0	0	0	0	0	0	0	0.3661	0	0	0	0	0	0	0	0	0.3985	0	0	0	0.7761	0	0	0	0.3961	0	0	0	0.0755	0	0.486	0	0	0.9785	0	0	3.4321	0	0	0	0	0
0.7632	103.956	0	0	0	0	0	0	0	0	1.6691	0	0	0	0	0	0	0	0	0	0	0	0	0	0	0	0	0	0	0	0	0	0	0	0	0	0	0	0	0	0	0	0	0	0	0	0	0	0	0
1.9264	103.956	0	32.5477	44.1919	13.9078	42.9312	42.8939	0	4.5097	4.9007	5.2166	0.8594	4.7588	5.0955	3.0984	3.6117	4.4489	3.0943	3.4163	5.4198	3.2258	4.6154	4.0367	3.0809	1.9823	2.2451	4.9587	1.9801	1.0703	0.7942	3.8555	0	2.7769	1.8281	3.7214	3.0204	2.1713	0	2.9695	3.1028	1.7309	2.2993	2.9769	3.1046	4.2598	5.0356	4.572	3.7745	2.786
3.1991	103.956	41.7452	0	0	31.0358	0	0	0	0	0	0	0	0	0	0	0	0	0	1.3821	0	0	0	0	0	0	0	0	0	0	0	0	0	0	0	0	0	0	0	0.747	0	0	0	0	0	0	0	0	0	0
2.2176	103.956	0	0	0	0	0	0	0	3.6088	3.2621	0	2.8981	2.3171	0	2.3099	0	0	0.6074	0	0	0	0	0	0	1.039	0	0	0	0.2842	0.7942	0.7563	0	0.8546	0.8673	0	0	0	1.2143	0	0	0.8693	0	0	0	0	0	3.513	4.5061	0
0.581	103.956	1971	2031.01	2120.01	1141.39	1451.2	1169.66	1354.96	0	0	0	0	0	0	0	0	0	0	0	0	0	0	0	0	0	0	0	0	0	0	0	0	0	0	0	0	0	0	0	0	0	0	0	0	0	0	0	0	0
3.5219	103.956	0	0	0	0	0	0	0	0	0.6631	0.6613	0	0	0	0	0	0.41	0	0	0	0	0	0	0	0.1021	0.5722	0.0514	0	0	0.0501	0	0.1913	0.769	0.0637	0	0	0	0	0.7322	0	0.3604	0	0	0	0	0	0	0	0
2.7887	103.956	39.6939	0	0	26.5251	56.0931	0	0	0	0	1.4718	0	2.1719	0	0.0777	1.9731	3.1048	0.9613	0.3944	3.9119	1.7259	0	0.0661	1.7785	1.3562	1.7999	0	0.0212	0.3617	0.4291	1.0767	0	2.2809	1.0175	0.6319	6.0906	0.2177	0	0	0.6783	0.0306	0.6739	2.6004	0.5224	0	0	0	1.1568	0
1.3239	103.956	0	0	0	0	57.7597	0	0	1.2798	2.1213	1.3069	0	1.0571	0.8508	0	0	0.4637	0.3205	0.5925	0	0	0	2.4996	0	0.3432	0.9288	1.2702	0	0	0	0	0	0.3515	0	0	0.387	0.9639	0.4894	0	0	1.2007	0	1.5601	0	1.3844	1.3128	0	0	3.8987
0.3335	103.956	0	0	0	0	40.9004	0	0	0	0	0	0.5742	0.28	0.3972	0.4632	0.09	0	0	0.5024	0	0	0	0	1.2046	0	0	0	0	0	0	0	0	0	0	2.5932	0	0	0.2221	1.3035	0	0	0	0.1486	0.1487	0	0	0	0	0
1.5966	103.956	0	0	0	8.2751	0	38.3639	0	2.1347	2.0393	0.1381	1.6377	0.3026	1.6075	1.0397	1.0127	0.187	0.1863	0.9007	0.8548	0	2.9229	2.1993	0	0.4665	0.1962	2.1644	0	0.4034	0.7518	1.3081	0.1308	1.3297	1.0322	0.219	0	0	0.1838	1.0766	0.2181	0.1206	2.0816	8.6126	0.5839	1.1108	0.3956	1.1214	0.5751	8.7493
2.5548	103.956	0	0	0	0	0	0	0	0	0	0	0	0.0642	0	0	0	0	0	0	0.7486	0	0	0	0	0	0.8721	0.3923	0	0.3544	0.5196	0	0	0	0	0	1.8157	0	0	0	0	0.6032	0	0	0.0561	0	0	1.4762	0	0
0.5469	916.848	0	0	0	0	0	0	0	0	0	0	0	0	0	0	0	0.5084	0	0	0	0	0	0	0	0	0	0	0	0	0.037	0	0.257	0	0.1372	0	0.1584	0.3584	0	0	0	0	0	0	0	0	0	0	0	0
0.6889	916.572	0	0	0	0	0	0	0	0	0	0	0	0	0	0	0	0	0	0.1826	0	0	0	0	0	0	0	0	0	0.0455	0	0	0	0	0	0	0	0	0	0	0	0	0	0	0	0	0	0	0	0
3.0859	916.554	0.0063	0	0	0	0	0	0	0	0	0	0.1023	0	0.0849	0	0	0	0.1164	0	0	0	0	0	0.1048	0	0.107	0	0	0	0	0	0	0	0.0848	0	0.0303	0.0465	0	0.0178	0.0536	0	0	0.0892	0.1284	0	0	0	0	0
0.5474	916.519	0	0	0	0	0	0	0	0	0	0	0	0	0	0	0	0.4844	0	0	0	0	0.1586	0	0	0	0	0	0	0.391	0	0	0.3256	0	0	0	0	0.2162	0	0	0	0	0	0	0	0	0	0	0	0
0.5582	916.198	0	0	0	0	0	0	0	0	0	0	0	0	0	0	0	0.0871	0.0734	0.0761	0	0	0	0	0	0	0	0	0	0.3767	0.098	0.0465	0.1684	0.0823	0	0	0.0973	0.1216	0	0	0	0.3723	0	0	0.1072	0	0	0	0	0
3.0789	915.571	0	0	0	0	0	0	0	0	0	0.0858	0	0	0.0674	0	0	0	0.0829	0	0	0	0	0.2192	0	0	0	0	0.0423	0.0801	0	0.0791	0.0551	0	0	0.0715	0	0	0	0.127	0.1373	0.0678	0.188	0	0	0	0.1652	0.0824	0.1397	0.0837
3.0836	914.565	0	0	0	0	0	0	0	0.2282	0.2249	0	0	0	0	0.1754	0.0141	0	0.1364	0.0751	0.2532	0.0102	0	0	0.1198	0	0.1447	0	0.1119	0	0	0.1745	0	0	0	0.2294	0	0.1053	0.1884	0	0.1685	0	0	0.0954	0	0.273	0.1637	0	0.3274	0
3.0899	913.567	0	0	0	0	0	0	0	0.287	0	0.2149	0.2722	0.422	0.1372	0.0723	0.1129	0.0725	0.1052	0.0734	0	0.1394	0.1789	0.2242	0.0927	0.0437	0.2813	0.1252	0.0797	0.1117	0	0.1645	0.1196	0.0818	0.1504	0.2627	0.0282	0.0485	0.1079	0	0.1264	0.0785	0.2446	0.3053	0	0.2442	0.222	0.0944	0.3171	0.2164
0.5451	913.234	0	0	0	0	0	0	0	0.3996	0.3011	0.2937	0.2516	0.2833	0.3322	0.4061	0.4627	0.4575	0.3632	0.3832	0	0.2396	0.365	0	0	0.0752	0.3319	0	0.2442	0.3951	0.3183	0.3768	0.3914	0.3851	0.3389	0	0.3218	0.34	0	0.143	0	0.5272	0.2364	0.4708	0.9966	0	0.2196	0	0.3187	0
0.4341	912.687	0	0	0	0	0	0	0	0	0	0	0	0	0	0	0	0	0	0	0	0.0361	0.118	0	0	0	0	0	0	0	0	0	0	0	0	0	0	0	0	0	0	0	0	0	0	0	0	0	0	0
3.0925	912.569	0	0.769	0	0	0	0	0	0.1268	0.2705	0.1561	0.1117	0.2459	0.1793	0	0.0799	0.1963	0.0597	0	0	0	0.134	0.1563	0	0.1037	0.019	0.2166	0.0175	0.0791	0.1259	0	0.1503	0.1606	0	0.1881	0	0.1421	0	0.1352	0.1536	0.0763	0.1689	0.1417	0.2608	0.216	0.2046	0	0.2248	0.167
0.5483	911.178	0	0	0	0	0	0	0	0	0	0	0	0	0	0	0	0.0953	0	0.0651	0	0	0	0	0	0	0	0	0	0.0575	0.0592	0	0.0546	0	0.0526	0	0.0593	0	0	0	0	0.0614	0	0	0.1139	0	0	0	0	0
0.5489	910.842	0	0	0	0	0	0	0	0	0	0	0	0	0	0	0	0	0	0	0	0	0	0	0	0	0	0	0	0.0894	0	0	0.0381	0	0	0	0	0	0	0	0	0.0466	0	0	0	0	0	0	0	0
2.0671	910.736	0	0	0	0	0	0	0	0	0.2058	0	0	0	0	0	0	0.2682	0.1873	0	0	0.1812	0	0	0	0	0	0	0	0.1123	0	0	0	0	0.1609	0.5037	0	0	0	0	0	0	0.1276	0	0	0	0	0	0	0
1.5887	910.608	0	0	0	0	0	0	0	0	0	0	0	0	0.1362	0	0	0	0	0	0	0	0	0	0	0	0	0	0	0	0	0	0	0	0	0	0	0	0	0	0.1055	0	0	0	0	0	0	0	0	0
0.5474	910.508	0	0	0	0	0	0	0	0	0	0	0	0	0	0	0.0519	0.0645	0	0	0	0	0	0	0	0	0	0	0	0.0298	0	0	0.0467	0	0	0	0.0482	0.0476	0	0	0	0.0602	0	0	0	0	0	0	0	0
1.2108	409.08	0	0	0	0	0	0	0	0	0	0	0	0	0	0	0.4733	0.2968	0.5635	0.1758	0	0.1361	0.4947	0	0	0	0.1	0	0	0	0.3019	0.1366	0.4563	0.1928	0	0	0.2231	0.5667	0	0	0	0.2707	0	0	0	0	0	0	0	0
1.0892	409.079	0	0	0	0	0	0	0	1.0182	0.6614	0	0	0	0.7324	0	1.3643	1.1373	3.6458	0.5245	0	0.6289	1.7814	0	0	0	0.3007	0	0.2527	2.561	1.6394	0.5277	1.9613	0.7269	0.4862	0	0.532	1.5318	0	0	0	0.9212	0	0	0	0	0	0	0	0
0.4541	408.366	0	0	0	0	0	0	0	0	0.2857	0	0	0	0	0.1118	0.0852	0	0	0	0.2318	0	0.102	0.1437	0	0	0.125	0.2081	0	0	0	0.0949	0	0	0.1293	0	0	0	0	0	0.0985	0	0.2528	0	0	0	0	0	0	0
1.8774	408.255	0	0	0	0	0	0	0	0	0	0	0	0	0	0	0.1382	0	0.1232	0	0	0.0747	0	0	0	0	0	0	0	0	0	0	0	0	0	0	0.0793	0	0	0	0	0	0	0	0	0	0	0	0	0
0.8353	408.047	0	0	0	0	0	0	0	0.3019	0.252	0.1624	0.2533	0.1519	0.0988	0	0.1331	0.2983	0.1953	0.1017	1.7411	0.1608	0.373	0	0.1979	0.2676	0.4182	0.2102	0.382	0.1811	0.4301	0.114	0.2417	0.4093	0.1778	0	0.1899	0.114	0	0.3876	0.8329	0	0.1132	0	0.2045	0	0.1409	1.631	0	0.4315
3.033	407.954	0	0	0	0	0	0	0	0	0.0351	0.0358	0.0636	0	0	0	0.0142	0.0148	0	0	0	0	0	0.0403	0	0.154	0	0.0968	0	0	0.014	0.1043	0	0	0	0	0.553	0.0222	0.0357	0.0358	0.0315	0	0.0359	0	0.0861	0	0.0495	0.0561	0	0
0.4612	407.336	0	0	0	0	0	0	0	0.604	0.4215	0	0.3763	0.3734	0.3085	0.4932	0	0.3636	0.2601	0.3002	0.2081	0.3772	0.4968	0.2856	0.3117	0.1335	0.3129	0.4158	0.2024	0.1201	0.266	0	0	0.2692	0	0.2748	0.3788	0	0.3893	0.2501	0.2145	0.105	1.6134	0.1883	0.2273	0	0.4691	0.3565	0	0.3925
0.4951	407.29	0	0	0	0	0	0	0	0	0	0	0	0	0	0	0	0	0	0	0	0.0891	0.0847	0	0	0	0	0	0.2068	0	0	0	0	0	0	0.1414	0.0932	0	0	0	0	0	0	0.2426	0	0	0	0	0	0
0.6834	407.253	0	0	0	0	0	0	0	0	0	0	0	0	0	0	0	0	0	0	0	0	0	0	0	0	0.1421	0.1685	0	0	0	0.2372	0	0	0.1515	0	0	0	0	0	0.275	0	0	0	0	0	0	0	0	0
1	407.2	0	0	0	0	0	0	0	0	0	0.5666	0	0	0	0.3388	0.5278	0.1159	0	0.1067	0.3441	0.4347	0.6799	0.2814	0.1257	0	0.2618	0	0.1528	0.3346	0.2395	0.3777	0.3244	0.475	0.3586	0.5592	0.5009	0.4119	0.3521	0.2324	0	0	0	0	0	0	0	0	0	0
0.7326	407.195	0	0	0	0	0	0	0	0.505	0	0	0	0	0	0	0	0	0.1117	0	0.3593	0	0.194	0	0.1165	0	0	0	0.163	0.2513	0	0	0	0	0	0	0	0	0	0	0.239	0	0	0	0	0	0	0	0	0
0.5863	407.19	0	0	0	0	0	0	0	0	0.093	0	0	0	0	0	0	0	0	0	0	0	0	0	0	0	0	0	0	0	0	0	0	0	0	0	0	0	0	0	0	0	0	0	0	0	0.2162	0	0	0
2.2428	407.189	0	0	0	0	0	0	0	5.7856	5.8574	5.5986	6.2466	5.7994	6.3423	7.52	2.189	2.0866	4.0492	18.7421	3.8833	1.8952	2.6417	10.6782	15.2435	12.5884	7.7398	8.0694	27.0948	3.5599	9.9746	13.485	7.9684	2.378	8.3941	11.4077	2.8461	3.0666	6.3918	1.8076	12.5164	7.2508	1.0863	0	0.6034	1.8832	10.9144	1.7583	0	0.7662
2.4598	407.18	0	0	0	0	0	0	0	0	0	0	0	0	0	0	0	0	0	0	0	0	0	0	0.2912	0.0091	0	0.2424	0	0	0.0604	0.2626	0.1148	0	0.1324	0	0.2393	0	0.2061	0	0.1988	0	0	0	0	0	0	0	0	0
3.4455	407.108	0	3.1976	0	0	0	0	0	0	0	0	0	0	0.2405	0.2024	0	0.022	0	0.0075	0	0	0	0	0	0.0428	0	0	0	0	0	0	0	0	0	0	0.2931	0	0.2421	0	0	0	2.2772	1.1231	0.599	1.6392	0.7074	1.777	0.4065	1.4884
0.9547	407.099	0	0	0	0	0	0	0	0	0	0	0	0	0	0	0.2437	0	0	0.2235	0	0	0	0	0	0	0	0	0	0	0	0.3262	0.1488	0.2121	0	0	0	0	0	0	0	0	0	0	0	0	0	0	0	0
0.5015	252.976	0	0	0	0	0	0	0	0	0	0	0	0	0	0	0	0	0	0	0	0	0	0	0	0	0	0	0	0	0	0	0	0	0	0	0	0	0.1459	0	0	0	0	0	0	0	0	0.218	0	0
0.4688	252.231	0	0	0	0	0	0	0	0	0	0	0	0	0	0	0	0	0	0	0	0	0	0	0	0	0	0	0	0	0	0	0	0	0	0	0	0	0	0	0.2387	0	0	0	0	0	0	0	0	0
1.226	252.203	0	0	0	0	0	0	0	0	0	0	0	0	0	0	0.1803	0	0	0	0	0	0	0	0	0	0	0	0	0	0	0	0	0	0	0	0	0	0	0	0	0	0	0	0	0	0	0	0	0
0.8893	252.161	0	0	0	0	0	0	0	0	0	0	0	0	0	0	0	0.2111	0	0	0	0	0	0	0	0	0	0	0	0	0	0	0	0	0	0	0	0.3103	0	0	0	0	0	0	0	0	0	0	0	0
0.6068	252.141	0	0	0	0	0	0	0	0	0	0	0.1735	0	0	0	0.114	0.3541	0.2814	0	0	0	0	0	1.0178	0	0	0	0	0.1824	0	0.9128	0.2037	0.4312	0.3539	0.3344	0.1281	0.2394	0	0	0	0	0	0	0	0	0.3512	0	0	0.7158
2.1807	252.137	0	0	0	0	0	0	0	0	0	0	0	0	0	0.1336	0.3074	0.2123	0.2677	0.6071	0.3463	0	0	0.1549	0.2688	0.1859	0.3545	0	0.4499	0.281	0.2136	0.4023	0.1236	0.2723	0.2732	0.349	0.2441	0	0.4647	0.4243	0.2445	0.1844	0.1761	0	0	0	0	0	0	0
1.5871	252.129	0	0	0	0	0	0	0	0.2838	0	0	0	0.1517	0	0	0	0	0	0	0	0	0	0	0.0163	0	0	0	0	0.0184	0	0	0	0.0269	0	0	0	0.0882	0	0.2371	0.3994	0	0	0	0	0	0	0	0	0
1.8253	252.123	0	0	0	0	0	0	0	0	0	0	0	0	0	0.8981	0.4755	0	0	0	0	0.3806	0	0.2053	0.3957	0	0.3981	0	0	0	0	0.1074	0.2283	0	0	0.3522	0	0.1201	0	0.3127	0	0	0	0	0	0	0	0	0	0
1.2259	252.123	0	0	0	0	0	0	0	0	0.2358	0.1153	0	0.3196	0	0	0.246	0.2177	0	0	0.5333	0.2341	0.2522	0.4595	0.4041	0.5809	0.2139	0.1075	0.1177	0.4562	0.2006	0	0.1985	0.4231	0.2766	0	0.2079	0.2938	0.0977	0.4051	0.6391	0	0	0	0	0	0	0	0	0
2.5524	252.088	0	0	0	0	0	0	0	0	0	0	0	0	0	0.2681	0	0	0	0	0	0.3208	0	0	0	0	0	0	0	0	0	0	0	0	0	0	0	0	0	0	0	0	0	0	0	0	0	0	0	0
0.8304	252.083	0	0	0	0	0	0	0	0.5385	0.5166	0.3452	0.3747	0.4706	0.4077	0.6706	0.6678	0.3751	0.273	0	0.6551	0.502	0.3593	0.7383	0.7426	0.5337	0.4648	0.7003	0.4277	0.8845	0.5606	1.3476	0.4151	0.3315	0.8074	0.6312	0.5489	0.3848	0.6507	0.4074	0.5362	0	0.1011	0.2557	0	0	0.2967	0	0.1773	0.3039
2.1853	252.076	0	0	0	0	0	0	0	0.1732	0	0	0	0	0	0	0	0	0.2246	0	0.2989	0.4584	0.1875	0	0.1095	0	0	0	0	0	0	0.1716	0	0	0	0.276	0.1987	0.1183	0	0	0	0	0	0	0	0	0	0	0	0
1.2237	252.025	0	0	0	0	0	0	0	0	0	0	0	0	0	0	0	0	0	0	0	0	0	0	0	0	0	0	0	0	0	0	0	0	0	0	0	0	0	0	0	0	0	0	0	0	0	0	0	0
0.5089	252.02	0	0	0	0	0	0	0	0	0	0	0	0	0	0	0	0	0.0618	0	0	0	0	0	0	0	0	0	0	0.0951	0.203	0	0.1473	0.067	0.0651	0	0	0.1135	0	0	0	0.0699	0	0	0	0	0	0	0	0
0.7839	251.167	0	0	0	0	0	0	0	0.0947	0	0.1446	0	0	0	0	0.3803	0.333	0	0	0.4924	0.2485	0.4799	0.8883	0.4414	0.8264	0	2.1718	4.4827	0	0	0	0.3532	0.1105	0	0.3908	0	0.3552	0	0	2.13	0.0621	0.176	0	0	0	0	0	0	0
1.9766	251.157	0	0	0	0	0	0	0	0.3349	0	0	0	0.1528	0	0.4515	0.2985	0.3103	0.2186	0.2453	0	0	0	0.506	0	0	0	0	0	0	0	0.1613	0	0.3864	0	0.2001	0.272	0	0	0.2556	0	0	0.2846	0.1817	0	0	0	0	0	0
1.892	107.048	0	0	0	0	0	0	0	0	0	0	0	0	0	0	0.5023	0	0	0	0	0.0218	0	0	0.4731	0	0	0	0	0.5033	0	0	0	0	0	0	0	0	0.3286	0	0	0	0	0	0	0	0	0	0	0
0.7257	106.066	0	0	0	0	0	0	0	0	0	0	0	0	0	0	0	0	0	0	0	0	0	0	0	0.2284	0	0	0	0	0	0	0	0	0	0	0	0.3127	0	0	0	0	0	0	0	0	0	0	0	0
1.0752	106.065	0	0	0	0	0	0	0	0.6487	0	0	0	0	0.4833	0	0	0	0	0	0	0	0	0	0	3.3427	0	0	0	0	0	0	0	0	0	0	0	3.1724	0	0	0	0	0	0	0	0	0	0	0	0
0.4868	106.065	0	0	0	0	0	0	0	1.2662	1.2463	1.2149	1.3043	1.3171	1.2785	1.1759	1.3107	1.281	1.1292	0.8085	1.4816	2.3969	1.3559	1.509	1.615	0	1.2899	2.067	1.0783	1.0552	0.3278	1.7854	0.9952	1.3361	1.4966	1.5561	0.8183	1.3829	2.0275	1.1995	1.9965	0.2984	1.301	0.908	1.2877	1.3409	0	1.4592	1.6261	1.3475
1.4358	106.029	0	0	0	0	0	0	0	0.4292	0.3838	0.3628	0.4412	0.4339	0.508	0	0.4527	0.5413	0.3872	0.4906	0.6803	0	0.3765	0.6335	0.562	0.4093	0.6864	0.8394	0.3211	0.3774	0.4256	0.5036	0.2911	0.5292	0.3418	0.6124	0.3105	0.3922	0.7055	0.4953	0.5675	0.3379	0.5122	0	0	0	0.4154	0	0	0
1.2176	105.957	0	0	0	0	0	0	0	0	0	0	0	0	0	1.5647	0	0	0.337	0	0	0	0	1.0073	0.2615	0	0	0	0	0	0.1297	0	0.0222	0.4049	0.2817	0	0	0	0	0	0	0	0	0.7586	0	0	0	0	0	0
2.2154	105.957	0	0	0	0	0	0	0	0	0	0	0	0	0	0	0	0	0	0.4828	0	0	0	0	0.2926	0.5106	0	0	0.3943	0	0.3788	0	0	0	0	0	0	0	0	0	0	0	0	0	0	0	0	0	0	0
1.0559	105.957	0	0	0	0	0	0	0	0	0	0	0	0	0.1807	0	0	0	0	0	0.6174	0	0	0	0	0	0	0	0	0	0	0	0	0	0	0	0	0	0	0	0	0	0	0	0	0	0	0	0	0
2.0963	105.07	0	0	0	0	0	0	0	0	0	0	0	0	0	0	0	0	0	0	0	0	0	0	0	0	0	0	0	0	0	0	0	0.3779	0	0.3151	0	0	0	0	0	0	0	0	0	0	0	0	0	0
0.679	105.069	0	0	0	0	0	0	0	0	0	0	0	0	0	0.371	0.5838	0.3878	0.4737	0.0688	0	0.8885	0	0.6793	0.6463	0.4692	0.5167	0	0	0.2563	0	0	0.5681	0.5381	0.5467	0	1.058	0.1073	0	0	0.4892	0.4918	0.5869	0	0	0	0.1255	0	0	0
0.4701	105.051	0	0	0	0	0	0	0	0.7389	0.655	0.6373	0.6983	0.6295	0.6403	0	0	1.0817	0	0.6162	1.1739	0.3942	0.4805	0	0	3.5105	0.424	1.2007	0.8596	0.1659	3.6423	0.3478	0.4767	0	0.3788	0.5664	0	0.657	0	0.5099	0	2.2086	0	0.9988	0	0	0	0.955	1.3805	0
1.3449	105.034	0	0	0	0	0	0	0	4.2947	4.4528	3.8877	4.1788	3.9842	4.066	10.3469	2.714	1.846	2.0774	1.8816	1.7808	10.4308	4.1571	2.8322	5.5758	1.6246	1.4563	3.426	1.0233	2.703	0.5173	5.3201	2.1725	0.9459	2.4122	3.9001	1.5188	2.0256	4.072	2.6914	6.987	1.9102	5.9418	6.3664	3.4815	8.7177	2.8582	4.3296	8.2262	7.7993
1.5466	105.034	0	0	0	0	0	0	0	2.4595	2.3737	2.3225	2.3482	2.064	2.2877	0	0	0	0	0	0	0	2.4224	0	0	23.8257	0	0	2.1878	0	28.6868	0	0	0	0	0	0	6.251	0	1.3054	0	26.8476	0	0	0	0	0	0	0	0
0.9454	105.034	0	0	0	0	0	0	0	0	0	0	0	0	0	0.5068	0	0	0	0	0	0	0	0	0	0	0	0	0	0	0	0.2262	0.1402	0	0	0	0	0	0	0	0	0	0	0	0	0	0	0	0	0
1.8308	105.033	0	0	0	0	0	0	0	0	0	0	0	0	0	0	0	0	0	0	0	0	0	0	0	0.2768	0	0	0	0	2.0271	0	0	0	0	0	0	0	0	0	0	0.0934	0	0	0	0	0	0	0	0
1.7072	104.107	0	0	0	0	0	0	0	9.7612	9.3521	9.0252	9.8258	9.4962	9.7362	12.5223	9.8301	10.2687	6.3601	10.7976	8.5718	8.0204	5.9811	10.4003	12.6578	6.3573	14.6144	13.0978	15.3818	9.9249	11.3137	12.5498	7.4057	11.878	13.2696	11.8696	9.4331	5.2386	26.0795	15.6631	16.0148	4.3331	13.0583	6.8748	3.362	6.2043	12.1161	9.7985	4.6492	6.8429
3.0866	927.538	4.5521	0	0	0	0	0	0	0.3113	0.1671	0.1042	0	0	0	0.1266	0	0.0332	0	0	0	0	0	0	0.1142	0	0	0	0.0943	0	0	0.0312	0	0	0	0	0	0	0	0	0	0	0	0.0957	0.1485	0.1434	0	0.1449	0	0.0061
0.5482	927.532	0	0	0	0	0	0	0	0	0	0	0.1414	0	0	0	0	0.2059	0.0867	0	0	0	0.1158	0	0	0	0	0	0	0.326	0	0	0	0.1164	0.2231	0	0.1809	0	0	0	0	0	0	0	0	0	0	0	0	0
3.0723	927.087	0	0	0	0	0	0	0	0	0	0	0.0098	0.0144	0.0166	0	0	0	0	0	0	0	0	0	0.127	0	0	0	0.0097	0.0324	0	0	0	0	0	0	0	0	0.2085	0.0176	0	0.01	0	0	0.003	0	0.0195	0	0.0242	0.0176
2.0678	927.071	0	0	0	0	0	0	0	0	0	0	0	0	0	0	0.1065	0	0	0	0	0.0676	0	0	0	0	0.0733	0	0	0	0	0	0	0	0	0.1189	0	0	0.1435	0.1357	0	0	0	0	0	0	0	0	0	0
0.4346	926.698	0	0	0	0	0	0	0	0	0	0	0.1043	0	0	0	0	0	0	0	0	0.1892	0.0535	0	0	0.0585	0.1295	0	0.1187	0.0932	0.0496	0.1784	0	0.2	0.0417	0.1008	0	0.1461	0	0	0	0.0387	0	0	0	0	0	0	0	0.0753
0.5021	925.16	0	0	0	0	0	0	0	0	0	0	0	0	0	0	0	0	0	0	0	0	0	0	0	0	0	0	0	0	0.0458	0	0	0	0	0	0	0.0422	0	0	0	0.0493	0	0	0	0	0	0	0	0
0.4722	922.664	0	0	0	0	0	0	0	0	0	0	0	0	0	0	0	0	0	0	0	0	0	0	0	0	0	0	0	0	0	0	0	0.2165	0	0	0	0	0	0.2745	0	0	0	0	0	0	0	0	0	0
0.5446	922.527	0	0	0	0	0	0	0	0.2861	0.1282	0.2024	0	0.1866	0.3169	0.1467	0	0.0847	0.2185	0.2861	0	0.0618	0	0	0	0	0.1819	0	0.1044	0.7366	0.5065	0.421	0.6476	0.2899	0.3725	0	0	0	0	0.1328	0	0.9551	0.1244	0.414	1.0007	0	0.1137	0	0.2416	0
0.5459	922.193	0	0	0	0	0	0	0	0.1404	0.1478	0.1911	0.0765	0	0	0.2613	0.4103	0.7714	0.2905	0.3043	0	0.1373	0.3659	0	0	0	0.2004	0	0.1454	0.6856	0.0958	0	0.5853	0.2699	0	0	0.318	0.5744	0	0.0866	0	0.5891	0	0.3844	1.0679	0	0	0	0.1593	0
0.545	921.86	0	0	0	0	0	0	0	0.1319	0	0	0.1368	0.2176	0.1459	0.1764	0.3434	0.6128	0.2104	0	0	0.0798	0.3018	0	0	0	0	0	0.1056	0.635	0.3575	0.1871	0.4571	0.3387	0.17	0	0.2603	0	0	0	0	0.661	0	0.3016	0.9253	0	0	0	0.1067	0
3.0908	921.553	0	0	0	0	0	0	0	3.7317	4.0839	3.3545	4.761	4.6187	5.0745	2.8497	4.779	8.1561	3.4214	5.7483	8.1776	5.0576	5.0948	4.7898	4.2539	3.0859	5.3891	6.9356	1.6224	3.8167	7.1686	6.4599	4.0472	6.8329	5.7599	6.3592	7.34	5.1247	2.786	6.5543	3.2551	2.0088	9.7155	6.3749	1.9261	5.8405	5.5285	0.9119	4.3702	4.7436
0.4857	921.15	0	0	0	0	0	0	0	0	0	0	0	0	0	0	0.043	0	0	0	0	0.1371	0	0.0759	0.0609	0.1499	0	0.1295	0.0578	0.0533	0.0752	0.0806	0	0.0557	0.0808	0	0	0.0773	0.1121	0	0.1732	0.0818	0	0	0	0	0	0	0	0
0.4491	920.686	0	0	0	0	0	0	0	0	0	0	0	0	0	0	0	0	0	0	0	0.078	0	0	0	0	0	0	0	0	0	0	0	0.0691	0	0	0	0	0	0	0	0	0	0	0	0	0	0	0	0
3.0911	920.556	0	0	0	0	0	0	0	2.5864	2.2923	2.6535	2.9873	3.2022	3.0734	2.0172	3.0871	4.695	2.267	3.2513	4.8968	3.9465	4.5108	2.9426	2.5462	2.026	2.9544	4.5894	1.0074	2.105	4.1457	3.9226	2.3399	4.2853	3.7122	3.7391	5.0575	3.7554	1.5469	4.0214	2.0719	1.3122	5.3723	4.391	1.5557	3.9144	3.4429	0.4107	2.8404	3.3255
0.4349	919.69	0	0	0	0	0	0	0	0	0	0	0	0	0.0954	0	0	0	0	0	0	0.0694	0.1158	0	0	0	0	0	0	0	0	0	0	0.0997	0	0	0	0.1326	0	0	0	0	0	0	0	0	0	0	0	0.1488
3.0857	919.552	0	0	1.3021	0	0	0	0.4258	0.4684	0.3194	0.179	0.1183	0.172	0.2373	0.2106	0.1552	0.0813	0	0.0693	0.2005	0	0	0.1071	0.1467	0.1379	0.2387	0.2298	0	0	0.1091	0	0.1262	0.1124	0	0.2082	0.068	0.0656	0.1816	0.1571	0.0936	0.1246	0.2705	0.299	0.1985	0.5502	0.3304	0.1294	0.2424	0.3306
1.8826	410.273	0	0	0	0	0	0	0	0	0	0	0	0	0	0	0	0	0.0763	0	0	0.1717	0	0	0.129	0	0	0	0	0.1236	0.0849	0	0.1163	0	0.0909	0	0	0.0703	0	0	0	0.0825	0	0	0	0	0	0	0	0
0.4651	410.127	0	0	0	0	0	0	0	0	0	0	0	0	0	0	0	0	0	0	0	0	0	0	0	0	0	0	0	0.0467	0	0	0	0	0	0.2848	0.1403	0	0	0	0	0	0	0	0	0	0	0	0	0
2.0212	410.098	0	0	0	0	0	0	0	0	0	0	0	0	0	0	0	0	0.2444	0	0	0	0	0	0	0	0	0	0	0.2332	0.2416	0	0	0	0	0	0	0	0	0	0	0	0	0	0	0	0	0	0	0
2.4108	410.054	0	0	0	0	0	0	0	0	0	0	0	0	0	0	0	0	0	0	0	0	0	0	0	0	0	0	0	0	0	0	0	0	0	0.2094	0	0	0	0	0	0	0.1413	0	0	0	0	0	0	0
0.8342	410.047	0	0	0	0	0	0	0	0	0	0	0	0	0	0	0	0	0	0	0	0	0	0	0	0	0	0.1183	0	0	0	0	0	0	0	0	0	0	0	0	0	0	0	0	0	0	0	0	0	0
2.1167	409.38	0	0	0	0	0	0	0	0	0	0	0	0	0	0.2901	0	0	0	0	0	0	0	0	0	0	0	0	0	0	0	0	0	0	0	0	0	0	0	0	0	0	0	0	0	0	0	0	0	0
0.46	409.376	0	0	0	0	0	0	0	0	0	0	0.3798	0	0	0.2221	0	0	0	0	0	0	0	0.2345	0	0	0	0	0	0	0	0	0.1005	0	0	0	0.3101	0.2083	0.1292	0	0	0	0	0	0	0	0	0	0	0
0.5006	409.341	0	0	0	0	0	0	0	0.2163	0.1664	0	0	0	0	0	0.0958	0	0	0	0.1521	0	0	0	0	0	0	0	0	0	0	0	0	0	0	0	0	0	0	0	0	0	0	0	0	0	0	0	0	0
3.0939	409.276	0	0	0	0	0	3.6281	0	0.5821	0	0	0	0	0	0	0.1652	0	0.3282	0	0.2048	0.0973	0	0	0.0819	0.2119	0	0.5073	0	0.1023	0	0.0724	0.2765	0	0.0083	0	0	0.0058	0	0.0388	0	0	0	0	0	0	0.0121	0	0.0696	0.3956
3.2339	409.27	0	0	3.7486	0	0	0	0.0391	0	0	0	0	0	0.0518	0	0.0885	0	0	0	0	0.2223	0	0.1364	0	0.0205	0.2227	0	0	0	0	0	0.0787	0	0	0.0133	0	0	0	0.04	0	0.0802	0	0.2627	0	0	0.0321	0	0	0
1.2501	409.23	0	0	0	0	0	0	0	0	0.296	0	0.2071	0	0	0.8493	0	0	0	0.3045	0	0.2386	0	0	0.8671	0.2307	0	0.0844	0.0628	0	0	0.7675	0	0	0.0964	0	0	0	0.3998	0.3492	0.2396	0.2212	0.2474	0	0	0	0	0.1878	0.1704	0
2.7681	409.22	0	0	0	0	0	0	0	0	0	0.5197	0	0	0	0	0	0	0.0123	0	0	0	0.0583	0	0	0	0	0.0714	0	0	0	0	0	0	0	0	0	0	0	0.0212	0	0	0	0	0	0	0	0	0	0
0.9705	409.214	0	0	0	0	0	0	0	0	0.1022	0.4968	0.0899	0	0.4431	0	0.3244	0.6999	0	0	0.7862	0.5669	0.4089	0.6514	0.4559	0.2598	0.3494	0.7595	0.2666	0.3484	0.3412	0.281	0.151	0.302	0.5274	0.2487	0.2912	0.3109	0.2555	0.6131	0.3346	0.4548	0.4088	0.5748	0	0.808	0.5349	0.6084	0	0.4599
0.6174	409.189	0	0	0	0	0	0	0	0.6505	0.4389	0.364	0.4005	0.5392	0.512	0.2693	0	0.0981	0.3332	1.7747	0.3668	0.1483	0	0.813	0.4756	0.599	0.5415	0.3682	1.7115	0.1277	0.6073	0.5475	0.3903	0	0.6247	0.5508	0	0.3007	0.5899	0.1303	0.7028	0.3532	0	0	0	0	0.7784	0.603	0	0
3.0887	409.183	10.4112	0.1762	0	0	0	0.3032	1.5679	0.1173	0.4713	0.3742	0.5828	0.1652	0.3654	0.4669	0.5585	0.5674	0.2841	0	0.6016	0.0512	0.377	0.447	0.0217	0.0136	0.2553	0.3248	0	0.2537	0.3623	0.3731	0.0937	0.3553	0.4278	0.5348	0.2934	0.3944	0	0.5927	0.1109	0	0.3795	0	0.5383	0	0	0	0.5596	0.4004
0.6733	409.093	0	0	0	0	0	0	0	0.3357	0.3094	0.2081	0.2197	0.1522	0.1208	0.5996	0	0.1964	0.3732	0	1.2299	0.3387	0.2894	0.1284	0	0.352	0.2254	0.3043	0.1086	0.151	0	0	0.1691	0	0.1419	0.173	0.1206	0.1192	0.2186	0	0.253	0.3493	0.4576	0	0.2835	0.6427	0.309	0.7312	0.1746	0
0.5853	253.146	0	0	0	0	0	0	0	0.5026	0.5284	0.3846	0.4172	0.8123	1.0024	0.7456	1.2894	0.6972	0.7987	0.4861	0.3838	0.6795	0.1947	0.9191	0.5217	0.9385	0.3271	1.2278	0.3463	0.5608	0.8687	0.8859	0.5055	1.1189	0.8645	0.3515	0.8091	0.7932	1.4861	0.9416	0.8297	0	0.807	0	0	0.4473	0.5357	1.3218	0	0.1832
2.4568	253.131	0	0	0	28.6708	43.0614	0	0	3.2235	3.1907	3.3084	3.3938	3.4159	3.5113	3.8514	1.5798	1.46	2.7646	14.5795	3.954	1.416	1.9248	6.5434	8.4629	3.8079	5.2572	3.3033	9.9844	1.7262	5.3246	6.2768	2.5376	1.8034	4.0152	6.3047	1.5197	1.9047	4.0791	1.192	5.4508	2.8816	0	1.2766	1.1772	2.3768	8.0507	2.3918	1.5242	1.8868
0.8091	253.126	0	0	0	0	0	0	0	0.1329	0.5937	0.4649	0.4243	0.6575	1.0761	0.5491	0.236	0.7399	0.5043	0.071	1.4119	0.0772	0.8168	0.2017	0.5635	0.3786	0.5049	0.6735	0.3371	0.3394	0.3023	0	0.4274	0.4708	0.4757	0.0971	0.4452	0.5758	0.6363	0.5772	0.5722	0.2007	0.4066	1.2505	0.1468	0.6156	0.5757	0	1.0887	1.1408
2.2371	253.123	0	0	0	0	0	0	0	0	0.543	0	0.2473	0	0	0.1066	0	0	0.227	0.5375	0.0894	0	0.178	0	0.2436	0	0	0	0.547	0	0.2849	0	0	0	0	0	0.2057	0	0.2541	0	0	0.1067	0	0	0	0	0.2402	0	0	0
2.7512	253.123	0	0	0	0	0	0	0	0.4365	0.3719	0.5925	0.5939	0.3559	1.1084	0.5218	0.035	0	0.2507	0.1488	0.6848	0.0807	0.0926	0.9389	1.0822	0.0581	0.485	0.1866	0.1463	0	0.2365	0.3549	0.0387	0.2457	0.0932	0.0934	0	0.2772	0.4059	0.367	0.2211	0.0308	0	0.5702	0	0	0.1268	0	0.8124	0.1034
1.2472	253.122	0	0	0	33.9005	0	0	0	0.8086	0.2876	0.8762	0.2158	0.2512	1.051	0	0.515	0.1942	0.4223	0.0789	1.4811	0.1875	0.9514	0.3302	0.1124	0.3319	0.2563	1.5757	0.7808	0.0544	0.1927	0.4665	0.6885	0.5652	0.1895	0.3144	0.2026	0.0737	0.4665	0.0515	0.2978	0.3486	0.8308	1.5331	0.1791	0.9664	0.2109	1.0752	0.2754	0.7354
2.9029	253.12	0	24.84	0	0	0	0	0	0.2865	0.0881	0	0	0.5733	0	0.1573	0.0961	0.5983	0	0.0666	0	0	0	0.0424	0.3279	0.1329	0	0	0	0.2549	0.0813	0.3282	0.0207	0	0	0.4307	0.0883	0	0	0	0.219	0	0	0	0.3188	0	0	0	0.1968	0
0.3415	253.113	0	0	0	46.24	0	0	0	0	0.3243	0	0	0.2536	0	0	0.0654	0	0	0	0	0.1188	0	0	0	0	0	0	0	0	0	0	0.1663	0	0	0	0	0	0	0	0	0	0	0	0	0	0	0	0	0
3.3663	253.113	0	0	0	0	0	1.2211	0	0.0257	0	0	0	0	0	0	0	0	0	0.1407	0	0	0	0	0	0.0402	0.2122	0	0	0	0	0	0	0	0.1343	0	0	0	0	0	0	0	0.1509	0	0	0	0	0	0	0
2.0649	253.111	0	0	0	0	31.2222	0	0	0.3397	0.6418	0.7046	0.4906	0.5433	0	0.8722	0.0786	0.5397	0	0	0.5947	0.2822	0	0.2472	0.4545	0.2153	0.8197	0.338	0	0	0.1467	0.1759	0	0.3319	0.1501	0.6194	0	0.1827	0.6327	0	0	1.3077	0.4291	0	0	0	0.5629	0	0	0.3307
0.6041	253.073	0	0	0	0	0	0	0	0	0	0	0	0	0	0	0.2794	0	0	0	0	0	0	0	0.4679	0.1531	0.1788	0	0	0	0	0	0	0	0	0	0.23	0	0.4155	0	0	0	0	0	0	0	0	0	0	0
2.6169	253.067	0	0	0	0	0	0.054	0	0	0.0062	0	0	0	0	0.0006	0	0	0	0.2321	0	0.0001	0	0	0.2847	0.0969	0	0	0.2238	0.2618	0.2771	0.321	0	0	0	0.2041	0	0.0011	0	0	0	0.0972	0.0001	0	0	0	0	0	0.0024	0
0.8738	253.066	0	0	0	0	0	0	0	0	0	0	0	0	0	0.4906	0.1834	0.1445	0	0.1484	0.3631	0.1823	0	0.264	0.2493	0.1886	0.1733	0.2409	0	0	0	0	0	0	0	0.2287	0.2504	0	0	0.2038	0.318	0.1412	0	0	0	0	0	0	0	0
2.341	253.063	0	0	0	0	0	0	0	4.2955	5.8561	6.0476	6.835	6.2605	4.499	5.62	4.5496	5.4618	8.3066	4.5867	0	4.3762	10.0074	0	0	2.7257	3.8253	0	4.569	14.7227	8.4727	6.5497	10.384	9.141	8.1864	0	9.2173	10.082	0	8.7973	0	8.9663	2.0325	3.8339	8.5957	1.1802	5.0215	0	6.8675	5.4523
1.2074	253.063	0	0	0	0	0	0	0	1.7919	0.7431	0.2597	0	0.2366	1.1196	1.3305	1.2644	1.4293	1.9843	1.1351	0	0.7222	1.7438	0	0	0.2542	0.3637	0	0.3987	1.2396	0.5259	0.3285	0.5743	0.61	0.3644	0	0.3582	0.5441	0	0.3206	0	0.3828	0	0	0.2412	0	0.1604	0	0	0.1895
0.424	253.045	0	0	0	0	0	0	0	0	0	0	0	0	0	0.1137	0	0	0.0959	0.0847	0.0888	0	0	0	0	0	0.0715	0.2495	0	0.0317	0.0799	0	0	0	0	0	0.1268	0.0782	0	0	0	0.0499	0	0	0	0	0.1023	0.2175	0	0
2.3875	108.045	0	0	0	0	0	0	0	0	0.7744	0.7649	0	0.8442	0.6484	0.3602	0.8461	0.9548	0.9576	0.6911	0.5637	0.9133	0.8596	0	0.4759	0.2191	0.7045	0.5991	0.241	1.4116	0.9891	0.8819	1.0661	1.3278	1.0417	0.8153	1.0667	1.017	0	1.1153	0.5377	0.8264	0.7783	0.3235	0.431	0	0	0	0.6493	0.5981
0.5149	108.045	0	0	0	0	0	0	0	6.172	5.8076	5.4383	6.1622	5.3823	5.3173	5.1281	7.294	10.4237	10.4439	5.0612	0	5.2416	6.1154	0	0.5817	2.5435	4.322	0	5.4316	13.315	7.5816	8.3386	7.4544	7.3295	8.0754	0	5.1132	9.4075	0.3823	3.6847	0	7.5004	3.6271	6.724	6.2873	2.6249	3.9579	0	7.352	3.1776
1.0683	108.043	0	0	0	0	0	0	0	0	0	0	0	0	0	0	0	0	0	0	0	0	0	0.2438	0	0	0.1958	0	0	0.0547	0.1507	0	0	0	0	0.2021	0	0.1911	0.2479	0.2262	0	0.1039	0	0	0	0	0	0	0	0
2.6388	108.01	0	0	0	0	0	0	0	0	0	0	0	0	0	0	0.1531	0	0	0	0	0	0.0116	0	0	0.0015	0	0	0.1117	0.1002	0	0	0.0176	0	0	0	0	0.0336	0	0.0475	0	0	0	0	0	0	0.0272	0	0	0
3.4533	107.086	0.2707	0	0	0	0.0518	0	0	0	0	0	0	0	0	0	0	0	0	0	0	0	0	0	0	0	0	0	0	0	0	0	0	0.0015	0	0	0	0	0	0	0	0	0.8725	0	0	0	0	0.2308	0	0.0657
2.8138	107.086	0	0	0	0	0	0	0	0	0.2859	0	0.3133	0.1181	0.1265	0.0209	0.0135	0.3941	0.1847	0.0358	0.2756	0.1403	0.9962	0	0.1402	0.1023	0.1001	1.5996	0	0.8218	0.2097	0.2361	0	1.061	0.0607	1.0482	0.0966	0.2791	0	0.9879	0	0	0	0.252	0.0443	0.4036	0.0504	0	0	0
3.2864	107.086	0	5.0551	0	0	0	0	4.3415	0.7232	0.0967	0	0.5155	0	0	0.223	0	0	0.2221	0.3218	0	0	0	0	0.2494	0.0588	0	0.2399	0.3431	0.0449	0	0	0	0	0	0	0	0	0.1569	0	0.0149	0.431	0	0	0	0	0	0	0	0
2.5671	107.086	0	0	0	0	0	0	0	0	0	0	0	0	0	0	0	0.1565	0	0	0	0	0	0	0.5892	0	0	0	0	0	0	0	0	0	0	0	0.2428	0	0	0	0	0	0	0	0	0	0	0	0	0
2.1367	107.085	0	0	0	0	0	0	0	0.6674	1.3048	0.0601	1.397	0	0.297	1.1947	0	0	0.2187	0	0	0	0	0.9102	0	0.195	0	0.099	0.3435	0.297	0	0	0.098	0.2609	0	0.3518	0	0	0.1438	0.6236	0.0399	0.2578	0	0	1.4213	0	0	0	0.1143	0
1.6576	107.085	0	0	0	0	0	0	0	0.5864	0	0.6959	0.1445	1.2419	1.1254	0.1566	0	0	0.5549	0	0	0.1427	0.1822	0.1895	0	0	0.2703	0.7028	0	0.602	0.4617	0.0655	0.0987	0.2736	0.203	0.1698	0.7361	0	0.1018	0.4198	0.9929	0	0	0.3051	0.204	0	1.3255	0	0	0.315
0.5375	107.084	0	0	47.1382	26.2374	0	0	0	0.1795	0.1969	1.2978	0.4696	1.4508	0.5302	0.7579	0.9615	1.3954	0.1241	1.1618	2.0959	0.5092	0.1721	0.8019	0.4568	0.889	0.9311	2.3157	0	0.4489	0.1586	1.0307	0.9813	1.3664	0.8797	1.2691	1.2236	0.906	0.9251	1.0859	1.0014	0	2.0667	2.2693	0.1524	1.01	1.0031	1.7793	2.676	0.9779
1.141	107.082	0	0	0	0	0	0	0	0.4588	0.2511	0	0.3763	0.4717	0	0.3375	0	0.1598	0	0.0654	0	0	0	0.2628	0.5088	0	0	0.3041	0.5737	0.331	0.1316	0.9415	0.2697	0.3284	0.3455	0.488	0.3077	0.0878	0.6428	0.1178	0.1561	0.0468	0	0	0.773	0	0.3636	0.0634	0.0482	0
1.4396	107.081	0	0	0	0	0	0	68.4499	0	0	0	0	0	0	0	0	0	0	0.6049	0	0	0	0.7576	0	0	0	0	0	0	0	0	0	0	1.0508	0	0	0	0	0	0.5608	0	0	0	0	1.3177	0	0	0	1.6265
0.9524	107.081	0	0	0	0	0	37.4135	0	0	0	0	0	0	0	0	0.2924	0	0	0.213	0	0	0	0	0.1466	0	0.1874	0	0.2619	0.0748	0	0	0.11	0	0	0	0	0	0	0	0	0	0	0.1176	0	0	0	0	0	0
1.8557	107.075	0	0	0	0	0	0	0	0	0	0.8998	0	0	0	0	0	0	0.0366	0	0	0.2874	0	0	0.4617	0	0	0	0	0.496	0	0.5595	0	0	0.1014	0	0	0	0	0	0	0	0	0	0	0	0	0	0	0
0.7253	107.049	0	0	0	0	0	0	0	0	0	0	0	0	0	0	0	0.6053	0	0	0	0	0	0.3481	0	0.394	0	0	0	0.4454	0.608	0.6157	0.4723	0.5136	0.4397	0	0	0	0	0	0.5901	0	0	0	0	0	0	0	0	0
0.464	936.677	0	0	0	0	0	0	0	0	0	0	0	0	0	0	0	0	0	0	0	0	0	0	0	0	0	0	0	0	0	0	0	0.2711	0	0	0.0323	0	0	0.2035	0	0	0	0	0	0	0	0	0	0
3.0823	936.541	0	0	0	0	0	0	0	0	0	0.1478	0	0	0.0857	0	0	0	0	0	0	0	0	0.1107	0	0	0	0	0.082	0	0	0.0539	0	0	0	0	0.0098	0	0.0097	0	0.0844	0	0	0	0	0	0	0	0	0
0.4316	934.639	0	0	0	0	0	0	0	0	0.3528	0.3176	0.2077	0	0	0	0	0	0.0704	0	0	0	0.0675	0.1421	0.0704	0.1425	0.156	0.3125	0	0	0.1627	0.0723	0.175	0	0.1002	0.1311	0.1534	0	0.2591	0.2556	0.3756	0.1391	0.225	0.3248	0.3495	0.3946	0.182	0.2642	0	0.2183
0.4315	934.21	0	0	0	0	0	0	0	0	0	0	0	0	0	0	0	0	0	0	0	0	0	0	0	0	0	0	0	0	0	0	0	0	0	0.1824	0	0	0	0	0	0	0	0	0	0	0	0	0	0.0993
0.436	933.703	0	0	0	0	0	0	0	0	0	0.1229	0.142	0.1027	0.1516	0.1292	0.3432	0	0.0818	0.0557	0.1163	0.2953	0	0.1529	0	0.1198	0.2909	0.1123	0.2464	0.1473	0.0526	0.334	0	0.373	0.0485	0.1624	0	0.1421	0	0	0	0.0538	0.1417	0.1295	0	0	0	0	0	0
3.0844	932.542	0.08	0.6616	0	0	0	0	0	0.1405	0	0	0	0	0.0924	0	0	0	0	0.1034	0	0	0	0	0	0	0	0.0834	0.0314	0	0	0	0	0	0	0	0	0	0.1288	0	0.0417	0	0	0	0	0.1225	0	0	0.1364	0.0629
0.5613	932.203	0	0	0	0	0	0	0	0	0	0	0	0	0	0	0	0	0	0	0	0	0	0	0	0	0	0	0	0.0758	0	0	0	0	0	0	0	0	0	0	0	0.1369	0	0	0	0	0	0	0	0
1.0717	931.354	0	0	0	0	0	0	0	0	0	0	0	0	0	0	0	0	0.7353	0	0.1364	2.0647	0	0	0.5697	0	0.055	0	0.0912	0.3078	0	0	1.1136	0	0.0471	0	0.0466	0.1148	0	0	0.3543	0.4709	0.8018	0	0	0.3013	0	0	0.1294	0
0.564	931.209	0	0	0	0	0	0	0	0	0	0	0	0	0	0	0.0378	0	0.0421	0	0	0	0	0	0	0	0	0	0	0.3372	0.0407	0.0592	0.1396	0.0439	0.0585	0	0.0462	0.1521	0	0	0	0.1898	0	0	0	0	0	0	0	0
3.0894	930.554	0	0	0	0	0	0	0	0.1821	0	0	0.0969	0.0341	0.1294	0.1757	0	0	0.1494	0.1686	0.0146	0.0723	0	0	0.0561	0	0.0272	0	0.0738	0.0501	0.1459	0	0	0.1353	0	0.073	0.1438	0	0.2103	0.0675	0.2029	0	0.2371	0	0	0	0.0906	0.1508	0.2142	0.325
2.0827	929.064	0	0	0	0	0	0	0	0	0	0	0	0	0	0	0	0	0	0	0	0	0	0	0.0645	0	0	0	0	0	0	0	0	0	0	0	0	0	0	0	0	0	0.0944	0	0	0	0	0	0	0
3.0855	928.55	0	0	1.7748	0	0	0	0	0.12	0.4639	0.4001	0.1631	0.1687	0.1945	0.4217	0.1319	0.2463	0.1403	0.2011	0.1913	0.0994	0.0123	0.2861	0.1795	0.1681	0.1829	0.1558	0.0848	0.1093	0.175	0.2717	0.1078	0.1396	0.1881	0.2563	0.1592	0.1528	0.2252	0.224	0.2393	0.1209	0.2087	0.4919	0.2743	0.358	0.1658	0.2075	0.4978	0.2496
0.5512	928.531	0	0	0	0	0	0	0	0	0	0	0	0	0	0	0	0	0.123	0	0	0	0.1502	0	0	0	0	0	0	0	0	0	0	0	0	0	0	0	0	0	0	0	0	0	0	0	0	0	0	0
0.5457	928.201	0	0	0	0	0	0	0	0.091	0.128	0	0.1389	0.0761	0.0949	0.1047	0.2536	0	0.1711	0.1698	0	0.2148	0	0	0	0	0.1433	0	0.0842	0.4437	0.2545	0.2027	0.277	0.1898	0.1074	0	0.3022	0.3053	0	0	0	0.5388	0.0736	0.1175	0.6972	0	0.0727	0	0.1516	0
0.5451	927.869	0	0	0	0	0	0	0	0	0.1027	0	0	0	0.1118	0.0797	0.259	0.3938	0.1696	0.1637	0	0.0733	0.0964	0	0	0	0	0	0	0	0	0	0.2895	0.2344	0.1128	0	0.2324	0.2715	0	0	0	0.4679	0	0	0.5906	0	0	0	0	0
2.2742	927.561	0	0	0	0	0	0	0	0	0	0	0.1792	0.1474	0.2001	0	0	0	0	0	0	0	0	0	0	0	0	0	0	0	0	0	0	0	0	0	0	0	0	0	0	0	0.2154	0.2793	0	0	0.1627	0	0	0.1387
2.7974	411.2	0	0	0	0	0	0	0	0.3554	0	0	0	0	0	0	0	0	0	0.086	0	0.2656	0	0.4695	0	0.2334	0	0	0	0	0	0	0	0.4826	0	0	0.5513	0.3441	0	0.1337	0	0	0.2695	0.1558	0	0	0	0	0.5264	0
0.9795	411.2	0	0	0	0	0	0	0	0.0988	0.4273	0.1086	0	0.354	0.2065	0	0.1943	0.7953	0.1614	0.3596	0.1967	0.6245	0.8147	0.6791	0.2357	0	0	0.3787	0.4459	0	0	0	0	0.5287	0	0.5941	0	0	0.367	0.8209	0.552	0	0	0.074	0	0	0	0	0	0.1081
1.233	411.198	0	0	0	0	0	0	0	0	0	0	0	0	0	0	0	0	0	0	0	0	0	0	0	0	0	0.11	0	0	0	0	0	0	0	0	0	0	0	0	0	0	0	0	0	0	0	0	0	0
2.5746	411.192	0	0	0	0	0	0	0	0	0	0	0	0	0	0.1884	0.1802	0	0.1413	0	0	0.3052	0	0.2594	0	0	0.3312	0.2661	0	0	0.2135	0	0	0.0716	0.1982	0	0.5934	0.1233	0	0.5323	0	0	0	0	0	0	0	0	0	0
1.7906	411.178	0	0	0	0	0	0	0	0	0.2075	0.2996	0	0	0	0	0	0	0	0.1849	0	0	0	0.2553	0.3014	0.2118	0.2719	0.2901	0.1383	0	0	0.4794	0	0	0	0	0	0	0.7186	0.2524	0	0	0	0	0	0	0.6377	0.246	0	0
3.0065	411.103	0	0	0	0	0	0	0	0	0	0.0784	0.0311	0	0	0	0	0	0	0	0	0	0	0	0.1291	0.1268	0	0.0502	0	0	0	0.0114	0.1252	0	0.0436	0	0	0.2669	0	0	0.2258	0	0.0027	0	0	0	0	0	0	0
2.0947	411.095	0	0	0	0	0	0	0	0	0	0	0	0	0	0	0	0	0	0	0	0	0.1236	0	0	0	0	0	0	0	0.4081	0	0.4654	0	0	0	0	0	0	0	0	0.3238	0	0	0	0	0	0	0	0
1.5525	411.094	0	0	0	0	0	0	0	0	0	0	0.6124	0.3392	0	0	0	0	0.6345	0	0	0	0.2386	0	0	0	0	0	0	1.0793	0	0	0.8285	1.8528	0.2464	0	0.8335	0.0325	0	0.1191	0	0.1149	0	0	0.5501	0	0	0	0	0
1	411.094	0	0	0	0	0	0	0	0	0	0	0	0	0	0	0.1723	0.1819	0.44	0	0	0	0	0	0	0	0.0584	0	0	0	0	0	0.309	0	0	0	0	0	0	0	0	0	0	0	0	0	0	0	0	0
1.8667	411.094	0	0	0	0	0	0	0	0	0	0	0	0	0	0	0.1892	0	0.4774	0	0	0	0	0	0	0	0	0	0	0	0	0.3031	0	0	0.1884	0	0.5871	0	0	0	0	0.1684	0	0	0	0	0	0	0	0
2.7513	411.094	0	0	0	0	0	0	0	0	0	0	0	0	0	0	0	0	0	0	0.0008	0	0	0	0	0	0	0	0	0.3311	0.007	0	0.3217	0	0	0	0	0.287	0	0	0	0	0	0	0	0	0	0	0	0
1.1496	411.094	0	0	0	0	0	0	0	1.9418	1.8216	2.3579	1.767	1.7007	0.7419	0	3.5915	1.5317	10.6051	1.2348	0	1.4459	4.2051	0	0	0.3491	0.8772	0	1.5107	19.1745	9.7479	3.3128	12.6133	8.8934	1.8032	0	3.1641	11.5638	0	1.7608	0	6.365	0	1.2797	0.9955	0	0.4171	0	0	0.1309
0.432	411.088	0	0	0	0	0	0	0	0	0	0	0	0	0	0	0.275	0	0.126	0.0557	0.0759	0.1705	0.0542	0.2197	0.1291	0.1044	0.1902	0.0649	0.192	0.1852	0.0398	0.2423	0	0.1915	0.1001	0.1639	0	0.098	0	0	0	0	0	0.0998	0	0	0	0	0	0.1067
3.2757	411.078	0	0	0	0	0	0	0	0	0.0037	0	0	0	0	0	0	0	0	0	0	0	0	0	0	0	0	0	0	0.4042	0	0	0	0	0	0	0	0	0.0875	0	0	0	0	0	0	0	0	0	0	0
2.3417	411.062	0	0	0	0	0	0	0	0	0	0	0	0	0	0	0	0	0	0.0695	0	0	0	0	0	0	0	0	0	0.1165	0	0	0.105	0	0	0	0	0.1586	0	0	0	0	0	0	0	0	0	0	0	0
1.1865	410.288	0	0	0	0	0	0	0	0	0	0	0	0	0	0	0	0	0	0	0	0.2899	0	0	0.1246	0	0.1458	0	0	0	0	0	0	0.2851	0	0	0	0	0.5773	0	0	0	0	0	0	0	0	0	0	0
2.6748	254.118	0	3.9923	0	0	0	0	0	0	0	0	0	0	0	0	0.0033	0.0197	0	0	0	0	0	0	0	0.2807	0	0	0	0.0053	0.1798	0	0	0	0	0	0	0	0	0	0	0	0	0	0	0	0	0	0	0
0.4722	254.113	0	0	0	0	0	0	0	0	0	0	0	0	0	0	0	0	0	0	0	0	0	0	0	0.2487	0	0	0	0	0.2409	0	0.2115	0	0	0	0	0	0	0	0	0.3144	0	0	0	0	0	0	0	0
0.8406	254.112	0	0	0	0	0	0	0	0.4717	0.3526	0	0.5035	0.2834	0.316	0	0.6253	0.258	0.2253	0	0.4527	0.4611	0	0	1.8031	0.6544	1.0458	1.142	1.1752	0.1914	0	2.5342	0.5615	0	0	0.2115	0.8419	0	1.2596	0.8458	0.54	0	0	0	0	0	0	0	0	0
0.6866	254.103	0	0	0	0	0	0	0	0	0	0	0	0	0	0	0	0.3042	0.167	0	0	0	0	0	0	0.1292	0.1397	0	0	0	0	0.4162	0.0635	0.2653	0.2354	0.2364	0	0	0.2216	0	0.238	0	0	0	0.3899	0	0	0	0	0
2.1245	254.092	0	0	0	0	0	0	0	0	0	0	0	0	0	0	0	0	0	0	0	0	0	0	0	0.218	0.166	0	0	0.0851	0.1195	0.1331	0	0	0.0835	0	0	0	0	0	0	0	0	0	0	0	0	0	0	0
3.0257	254.087	0	0	0	0	0	0	0	0	0.1493	0	0	0	0	0	0	0	0.353	0	0	0.22	0	0	0	0.1669	0.1125	0	0.2615	0.0657	0	0.098	0.151	0.119	0.132	0.2898	0.2832	0.1159	0	0.4137	0	0	0	0	0	0.6456	0	0	0.2449	0.7906
3.2566	254.081	0	0	0	0	0	0	0.0195	0.3192	0	0	0	0.1875	0	0	0	0	0	0	0.6501	0	0	0.1104	0.0068	0	0	0	0	0	0	0	0	0.0078	0	0	0	0.1829	0.0849	0	0	0	0	0	0	0	0	0.0193	0	0
1.9919	254.048	0	0	0	0	0	0	0	0.3534	0.26	0.2503	0.3139	0.1972	0.2669	0	0.093	0	0	0	0	0	0	0	0	0.0611	0	0.332	0	0	0.2026	0.2933	0.1753	0	0	0	0	0.1606	0.4805	0.2068	0	0	0.9702	0.6806	0.3778	0.5434	0	0	0	0
1.1287	254.011	0	0	0	0	0	0	0	0	0	0	0	0	0	0.1043	0	0.0979	0	0	0	0	0	0	0	0	0	0	0	0	0	0	0	0	0	0	0	0	0	0	0	0	0	0	0	0	0	0	0	0
0.55	254.009	0	0	0	0	0	0	0	2.8026	2.864	2.4735	2.601	2.4329	2.4418	2.8288	1.7891	2.1734	1.4994	1.5747	0	1.3707	1.6455	0	0	0	1.8891	0	1.7406	1.221	1.2083	1.5586	1.1887	1.8162	1.4016	0	1.6862	1.3511	0	1.8987	0	1.5544	2.1723	3.0397	3.7529	1.0311	2.4222	0	3.3548	2.5664
0.6101	253.262	0	0	0	0	0	0	0	0	0	0	0	0	0	0	0	0.4589	0	0	0	0	0	0	0	0	0	0	0	0	0	0	0	0	0	0	0	0	0	0.1483	0	0	0	0	0	0	0	0	0	0
0.4485	253.215	0	0	0	0	0	0	0	0	0	0	0	0	0	0.3489	0.1907	1.437	0.1384	1.1501	1.2069	0.4661	0.4728	0.3931	0.1633	0.2495	0.9177	1.5968	0.495	0.2888	0.2254	0.6833	1.0439	0.6818	0.5113	0.6496	0.3111	1.05	0.6343	1.4379	0.2362	0.8705	0.241	2.7464	0.5164	0.9389	0.7014	1.7977	3.3635	0.8019
3.2695	253.194	0	0	0	0	0	0.2841	0	0.0053	0	0.0418	0	0	0.0588	0	0	0	0.0985	0	0	0	0	0	0	0.0423	0	0.1261	0.1435	0	0.029	0.226	0.1999	0	0.1776	0	0	0	0.1899	0	0.182	0	0	0	0	0	0	0	0	0
1.0838	253.155	0	0	0	0	0	0	0	0.5396	0	0.6355	0.3689	0	0.3028	0	0.4852	0	0.4126	0.4018	0.9308	0	0	0.4092	0.9866	0.5137	0.6087	0.3299	0.4995	0	0.3266	0.6532	0.3515	0.487	0.3235	0.7278	0.6285	0.1642	0.9963	0.5911	0.533	0.2316	0.5259	0	0	0	0	0	0	0
1.4655	253.143	0	0	0	0	0	0	0	0	0.2009	0.208	0	0.4299	0	0.4952	0.8881	0.7287	0.1869	0.1997	0.3604	0.5951	0	0	0	0.1494	0.3164	0	0.4039	0.278	0.4838	0	0.223	0.5433	0.6677	0.5024	0	0.2354	0.4093	0	0	0.1562	0.3378	0	0	0	0.4466	0	0	0
1.6778	253.143	0	0	0	0	0	0	0	1.233	1.1989	0.8435	0.8589	0.7242	1.2381	0.1978	0	0.2706	0	0.6883	0	0.6068	0.7144	0.4247	0.4311	0.3966	0.1467	0.9985	0	0	0	0.4353	0.1521	0	0	0.2414	1.6671	0	0	0	0	0.3742	3.4694	5.3717	2.5253	3.1359	4.1151	5.2999	1.9822	3.7729
0.4663	109.101	0	0	0	0	0	0	0	0	0	0	0	0	0	0	0	0	0	0	1.9365	0	1.9173	1.024	0	0	0	2.0587	0.3087	0	0	0	0	0	0	1.3126	1.5857	0	1.2403	1.621	1.5031	0	1.1378	0	0	2.758	0	1.9403	0	1.5347
0.6715	109.101	0	0	0	0	0	0	34.0127	0	0	2.0619	0	1.9864	2.0025	1.5548	0	0	0	0	0	0	0	0.7611	0.7821	0	0.2752	0	1.124	0	0	0	0	0	0	0.9521	0	0	0	0.829	0.0898	0	0	0.5865	0	2.3588	1.4704	0.3144	3.0886	2.3663
1.8227	109.101	0	0	0	0	0	0	0	0	0	0	0	0	0	0	0	0	0	0.9282	0	0	0	0	0	0	0	0	0	0	0	0	0	0	0	0	0	0	0	0	0	0.832	0	0	0	0	0	0	0	0
2.8092	109.101	0	1.9894	0	0	0	0	0.4426	0	0	0.6329	0.8695	0.0393	0.8372	0.5266	0.2431	0.2121	0	0.1168	2.0389	0.3207	0.436	0.7256	1.1637	0.3291	1.1493	3.0671	0.0478	1.513	0.12	0.0979	0.6817	2.1844	0.1826	3.1102	0	0.1301	0.1153	0.3242	0.1097	0.0453	0.9698	0.5938	0	2.2262	1.8659	0	0	1.43
3.2908	109.101	7.1269	21.8218	1.906	0	10.4952	0	0	0.9081	0	1.5197	0	0.867	0	0	0	0	0	0	0	0	0	1.0377	0	0.3826	0.033	0	0.0613	0	0	0.3301	0	0	0.4312	0.9199	0	0	0.3036	0	0	0.4129	0	0	0	0	0.0548	0	0	0
2.1694	109.1	0	0	0	0	0	0	0	2.4654	0.8939	0.8896	2.5654	0.1369	0.5212	0.2338	0	0	0	0	0	0	0	0.2127	0.2518	2.0676	0	0.3832	0.7299	0	0	0	1.2312	0.1757	0.0351	1.7917	0	0	1.0213	1.0488	0.6261	0.2631	0	1.2419	2.655	0.2325	0.9102	1.5426	0	0
1.6215	109.1	0	0	0	0	0	0	0	1.7531	0.0317	0.4576	0.3867	2.7411	2.6776	0	0	0.1932	0.578	0.3271	0.9526	0.4418	0.2982	1.453	0.8421	0.8594	0.4163	0	0.0944	0	0	0	0.4192	0	1.3059	1.5684	0	0	0.1584	0.0922	0.6764	0.3888	0	3.2362	0.3275	2.4654	2.5924	0.4333	0.3024	1.85
0.8355	109.095	0	0	0	0	0	0	0	0	0	0	0	0	0.5587	0.7283	0.3459	0	0	0	0	0	0	0.5972	0	0	0.2367	0	0.4135	0.6216	0	0.3419	0.2603	0	0	0	0	0	0.8046	0.1219	0	0.143	0	0	0	0	0	0	0.2157	0
1.0986	109.086	0	0	0	0	0	0	0	0	2.3045	0.5103	1.7207	1.0474	0.4861	2.5822	0.371	0.6093	1.0605	1.1811	0.3756	0.6856	0	3.3393	1.7102	0.3861	0.6208	1.5227	0.8188	0.3318	0.3206	0	0.5895	0	0.4562	2.0214	0.9524	0.6209	0.9008	0	1.9656	1.1316	1.5173	0	0.4021	0.2725	0.2908	0.8886	3.6517	0
2.6526	109.072	0	0	0	0	0	0	0	0	0	0.1338	0	0	0.0041	0.0656	0.6825	2.0759	1.2438	0.5361	2.4615	0	0	0	0	0	1.1208	4.3726	0.4945	1.4846	0.9566	1.5207	0.6577	1.4286	0	0	0.4815	1.9047	0	0	1.0209	0.4938	0	0.8797	0	0.0242	0.6872	1.8601	0	0.9782
0.5704	109.06	0	0	0	0	0	0	0	0.7241	0.7124	0.635	0.7242	0.7509	0.7772	1.4781	0.8854	0	0	1.5095	0	0.4975	0.7656	0.4898	0.9709	0	0.6396	0	0	1.2939	0	1.382	1.8038	1.3635	1.4334	0	0.8389	1.8218	0	0.6767	0.3264	1.8538	0.8912	1.5694	2.4217	2.3588	0.9858	0	0.7543	0
2.0394	109.04	0	0	0	0	0	0	0	0	0	0	0	0	0	0.3657	0.438	0.3131	0.3219	0.2826	0.4458	0.2716	0	0.4264	0	0	0.396	0.4149	0.2563	0.3636	0	0	0	0	0	0.4159	0	0	0	0	0.4368	0	0.3572	0	0	0	0	0	0	0
1.7547	108.081	0	0	0	0	0	0	0	0	0	0	0	0	0	0	0	0	0	0	0	0	0	0	0	0.1524	0	0	0	0	0	0	0	0	0	0	0.2296	0.2251	0	0	0	0	0	0	0	0	0	0	0	0
1.246	108.081	0	0	0	0	0	0	0	0.4372	0.3163	0.3635	0.3413	0	0.3226	1.1365	0	0	0	0	0	0.4211	0	0.4568	0.8147	0.41	0	0	0	0.7692	0	2.3896	0.6546	0	0.9775	1.3872	0.5057	0.4751	0	0	0	0	0.3858	0	0	0	0	0	0	0
0.7861	108.045	0	0	0	0	0	0	0	1.2893	1.1495	1.0458	1.1472	1.0369	1.1156	2.0475	1.611	1.8289	1.1328	1.2005	1.3751	2.055	0.6478	2.4172	2.0862	1.429	1.6982	2.4138	0.8883	1.4979	1.3009	1.7841	1.2053	1.4391	1.5028	2.203	1.272	0.8939	1.1023	1.3047	2.1361	0.5511	1.8982	0.7808	0.8555	0.7621	1.298	1.0855	0.7826	0
1.2076	108.045	0	0	0	0	0	0	0	0	0	0	0	0	0	0	0	0.2333	0.2948	0	0	0	0.2008	0	0	0	0	0	0	0.104	0	0	0	0	0	0	0	0	0	0	0	0	0	0	0	0	0	0	0	0
0.5041	948.659	0	0	0	0	0	0	0	0	0	0	0	0	0	0	0	0	0	0	0	0	0	0	0	0	0	0	0	0.0987	0.054	0	0	0	0	0	0	0.0361	0	0	0	0	0	0	0	0	0	0	0	0
3.0931	948.555	0	0	0	0.5401	0	0	0	0	0	0	0	0	0	0	0	0	0.0658	0.3285	0	0.0335	0	0	0.5128	0	0.4994	0	0.3253	0	0	0	0	0.1431	0	0	0.0371	0	0.4248	0	0.2362	0.2215	0	0	0	0	0	0	0	0
3.0841	947.541	0	0.9607	0	0	0	0	0	0.2592	0.3682	0.1354	0	0	0	0	0	0	0.1258	0.2492	0	0	0.2925	0	0.1708	0.0732	0	0	0.0615	0	0.0347	0.0662	0	0	0.02	0	0	0	0	0	0.1957	0	0	0	0.1648	0.304	0.1841	0.0719	0	0
3.0875	946.551	0	0	0	0	0.46	0	0	0.9704	0.1749	0.3702	0.7888	0.7889	0.2689	0.3083	0.7411	0.6656	0.5725	0.815	0.4668	0.3365	0.3404	0.7009	0.486	0.3257	0.279	0.5585	0.5387	0.3017	0.5606	0.221	0.2906	0.309	0.4057	0.8343	0.0843	0.5967	0.3706	0.6412	0.4299	0.4767	0.9485	1.4602	0.6233	0.9271	0.6641	0.6005	1.0065	0.5231
0.5653	946.214	0	0	0	0	0	0	0	0	0	0	0	0	0	0	0.046	0	0	0	0	0	0	0	0	0	0	0	0	0.2858	0.0328	0.0531	0.1694	0.0408	0.1233	0	0	0.119	0	0	0	0.0761	0	0	0	0	0	0	0	0
3.0932	945.547	0	0	0	0	0	0	0	0.1491	0	0.1317	0.1029	0.2064	0.156	0	0.1545	0.1743	0.1388	0.1672	0.1595	0.0695	0.0813	0.0303	0.128	0	0.1117	0.0394	0.0602	0	0.0437	0.1393	0.096	0.1579	0.0561	0.1546	0.1083	0.1287	0	0	0	0	0	0.0959	0	0.1862	0.2028	0.0353	0	0.1447
2.0799	944.739	0	0	0	0	0	0	0	0	0	0	0	0	0	0	0	0	0	0	0	0	0	0	0	0	0	0	0	0	0	0	0	0	0	0	0.1118	0	0.2092	0	0	0	0	0	0	0	0	0	0	0
0.4267	941.711	0	0	0	0	0	0	0	0	0	0	0	0	0	0	0	0	0	0	0	0.2351	0	0	0	0	0	0	0	0	0	0	0.0444	0	0	0	0	0	0	0	0	0	0	0	0	0	0	0	0	0
0.4324	940.713	0	0	0	0	0	0	0	0.1025	0	0	0	0.0813	0	0.1162	0.9011	0	0.449	0.1195	0.0834	0.1069	0	0.6893	0.1081	0.2476	0.4917	0	0.5229	0.5415	0	0.4717	0	0.5236	0.2172	0	0	0	0	0	0	0	0.066	0.233	0	0	0	0	0	0
3.0912	940.533	0	0	0	0	0	0	0	0	0	0.0946	0	0.1579	0	0.1759	0.116	0.1373	0	0	0	0	0.1686	0.1643	0	0	0.1645	0.0123	0.094	0	0	0	0	0.0986	0.1166	0.0108	0.0518	0	0.1266	0	0.0748	0.0742	0	0	0	0.0475	0.101	0	0	0.1734
0.5035	940.149	0	0	0	0	0	0	0	0	0	0	0	0	0	0	0	0	0	0	0	0	0	0	0	0	0	0	0	0.0721	0.0416	0	0	0	0	0	0	0.0404	0	0	0	0	0	0	0	0	0	0	0	0
3.0877	939.532	0	0	0	1.3676	0	0	0	0.2201	0.3647	0.1833	0	0.1613	0	0.1554	0	0.1531	0.107	0.1844	0.0229	0	0	0	0	0.1251	0.2164	0.1232	0	0.0683	0	0.1569	0.1032	0.0495	0.0725	0	0.0097	0.0219	0	0.1107	0	0.095	0	0.0467	0.1609	0.265	0.1635	0.1073	0.2614	0.0368
3.0796	938.537	0	0.0499	0	0	0	0	0	0.0976	0	0.1476	0.164	0	0	0.0917	0.1161	0.1557	0.105	0	0.0908	0	0.0674	0	0.0956	0	0.1891	0	0.087	0.0485	0	0	0.0868	0	0.004	0	0.0958	0	0.1678	0	0	0.0186	0	0	0	0.2057	0.0536	0	0	0
0.4853	938.176	0	0	0	0	0	0	0	0.0948	0.1747	0.195	0.2112	0.232	0.2127	0.0837	0.2908	0.2614	0.3592	0.0496	0.465	1.1802	0.3752	0.4038	0.3549	0.886	0.2149	0.8362	0.2772	0.3853	0.5283	0.6735	0.2024	0.487	0.5731	0.3313	0.0592	0.4207	0.3707	0.264	1.0187	0.399	0.2277	0	0	0	0	0.186	0.2211	0.1846
0.5661	937.701	0	0	0	0	0	0	0	0	0	0	0	0	0	0	0	0	0	0	0	0	0	0	0	0	0	0	0	0.0681	0	0	0	0	0	0	0	0.0341	0	0	0	0	0	0	0	0	0	0	0	0
0.5558	937.534	0	0	0	0	0	0	0	0	0	0	0	0	0	0	0	0	0	0	0	0	0	0	0	0	0	0	0	0.0386	0	0	0	0	0	0	0	0.0338	0	0	0	0	0	0	0	0	0	0	0	0
2.1489	413.126	0	0	0	0	0	0	0	0	0	0	0	0	0	0	0	0	0	0	0	0	0	0	0	0	0	0	0.2295	0	0	0	0	0	0	0	0	0	0	0	0	0.2606	0	0	0	0	0	0	0	0
1.5862	413.124	0	0	0	0	0	0	0	0.4453	0.545	0.5764	0.6058	0	0.3819	0	0	0	0	0	0	0	0.3617	0	0	0.0907	0	0	4.3307	0	6.8871	0	0	0	0	0	0	0.2309	0	0.313	0	0	0	0	0	0	0	0	0	0
1.8234	413.123	0	0	0	0	0	0	0	1.7793	0.789	1.5293	0	0.6642	1.5462	0	0	0	0	0	0	0	2.7042	0	0	7.2002	0	0	1.1464	0	20.4938	0	0	0	0	0	0	3.5265	0	0.5702	0	19.6598	0	0	0	0	0	0	0	0
0.888	413.122	0	0	0	0	0	0	0	0	0	0	0	0	0	0	0	0	0	0	0	0	0	0	0	0.2185	0	0	0.4603	0.0753	0.1372	0	0	0	0	0	0	0.0344	0	0	0	0	0	0	0	0	0	0	0	0
2.3856	413.122	0	0	0	0	0	0	0	0	0	0	0	0	0	0	0	0	0	0	0	0	0	0	0	0.1913	0	0	0.0614	0	0.0377	0	0	0	0	0	0	0	0	0	0	0	0	0	0	0	0	0	0	0
1.218	413.121	0	0	0	0	0	0	0	0	0	0	0	0	0	0	0	0	0	0	0	0	0	0	0	1.5299	0	0	1.0782	0	0	0	0	0	0	0	0	0	0	0	0	0.8219	0	0	0	0	0	0	0	0
0.5659	413.1	0	0	0	0	0	0	0	0	0	0	0	0	0	0	0	0	0	0	0	0	0	0	0	0	0	0	0	0.118	0	0	0	0	0	0	0	0.05	0	0	0	0.0497	0	0	0	0	0	0	0	0
2.3382	413.045	0	0	0	0	0	0	0	0	0.2655	0	0	0	0	0	0	0.054	0.073	0.0645	0	0.0658	0.2246	0	0	0	0	0	0	0	0	0	0.1225	0.1489	0	0	0	0	0	0.0654	0	0	0	0	0.3218	0	0	0	0.3518	0
0.8639	412.318	0	0	0	0	0	0	0	0	0	0	0	0	0	0	0	0	0	0	0	0.0869	0	0	0	0	0	0	0	0.1276	0	0	0	0	0	0	0	0	0	0	0	0	0	0	0	0	0	0	0	0
0.4669	412.289	0	0	0	0	0	0	0	0	0	0	0	0	0	0	0	0	0	0	0	0	0	0	0	0	0	0	0	0	0	0	0	0.0604	0	0	0	0	0	0.3218	0	0	0	0	0	0	0	0	0	0
0.5947	412.216	0	0	0	0	0	0	0	0	0	0	0	0	0	0	0.1423	0	0	0	0	0	0	0	0	0.0676	0	0	0	0.0655	0	0	0.0828	0	0	0	0	0	0	0	0	0	0	0	0	0	0	0	0	0
0.4444	412.13	0	0	0	0	0	0	0	0	0	0	0	0	0	0.1055	0	0	0	0	0	0.1333	0	0	0	0	0	0	0	0	0	0	0	0	0	0.525	0.0783	0	0.1786	0	0	0	0.1665	0	0	0	0	0	0	0
0.4757	411.293	0	0	0	0	0	0	0	0	0	0	0	0	0	0	0	0	0	0	0	0	0	0	0	0	0	0	0	0	0	0	0	0	0	0	0.0739	0	0	0.114	0	0	0	0	0	0	0	0	0	0
1.638	411.236	0	0	0	0	0	0	0	0	0	0	0	0	0	0.5312	0	0.2686	0	0.258	0	0.2282	0	0	0.5992	0.2386	0.2017	0	0.0709	0	0	0.5975	0	0	0	0	0	0	0.5285	0	0	0	0	0.813	0	0	0	0	0.4328	0.6987
2.1964	411.221	0	0	0	0	0	0	0	0.1651	0	0	0.1544	0	0	0	0	0	0	0.8683	0	0	0.2023	0.3043	0.42	0.4676	0.1451	0.3265	1.2507	0	0.2774	0.4587	0.2185	0	0.2043	0.3735	0	0.1012	0.1598	0	0.3924	0.1519	0	0	0	0	0.2693	0	0	0
0.7235	411.2	0	0	0	0	0	0	0	0.5066	0	0	0	0.6289	0.0888	0.3453	0	0	0	0	0	0	0	0	0	0	0	0	0	0	0	0	0	0	0	0	0	0	0	0	0	0	0	0	0	0	0	0	0.2217	0
1.2677	255.124	0	0	0	0	0	0	0	0	0	0.1606	0	0	0	0	0	0	0	0	0	0	0	0	0	0	0	0	0.1478	0	0.075	0	0	0	0	0	0	0	0	0	0	0	0	0	0	0	0	0	0	0.1025
1.0535	255.115	0	0	0	0	0	0	0	0	0	0	0	0	0.6828	0	0.4558	0	0.2705	0	0	0	0	0.4673	0	0.2639	0.3454	0.0991	0.1721	0.0952	0.5743	0.1621	0.0974	0	0	0.7515	0.7045	0.09	0.287	0.6287	0	0.2307	0	0	0	0	0	0	0	0
2.7986	255.111	0	0	0	0	0	0	0	0.2764	0.418	0.9727	0.4521	0.5484	0	0.3377	0.2754	0.3839	0.5528	0.0981	0.6836	0.2805	0.2023	0.9297	0.7333	2.7706	0.3503	0.2707	0.7484	0.3797	2.8772	0.39	0.3849	0.1001	0.6464	0.4708	0.1827	0.3649	0.5743	0.6651	0.3207	2.1934	0	0	0.4227	0.5673	0	0.5276	0	0.0951
1.5443	255.102	0	0	0	0	0	0	0	36.3549	35.4622	34.6608	37.1751	35.5314	35.507	0	0.185	0.1706	0.1941	0.3622	0.0581	0	30.2911	0.2416	0	386.938	0.1097	0	37.4257	0.2111	476.985	0.1911	0	0.29	0	0	0	70.6731	0.4374	18.667	0.2136	436.598	0	0	0	0	0	0	0.6229	1.2522
0.4944	255.102	0	0	0	0	0	0	0	5.4143	5.1722	5.2847	5.3084	4.9526	5.4288	0	0	0	0	0	0	0	3.0659	0	0	41.1085	0	0	11.5804	0	42.7207	0	0	0	0	0	0	9.6416	0	2.2641	0	27.5659	0	0	0	0	0	0	0	0.2233
1.7885	255.102	0	0	0	0	0	0	0	0.2393	0.1567	0	0.0392	0	0.571	0	0.1412	0	0	0	0	0	0	0	0	0.3921	0	0.1318	0	0	0	0	0.0685	0.1291	0	0	0	0.0426	0	0	0	0.4303	0	0	0	0	0	0	0	0
2.1548	255.1	0	0	0	0	0	0	0	0	0	0	0	0	0	0	0.2432	0	0	0	0	0	0	0.2753	0.2399	0.3033	0	0	0	0	0.1881	0.3558	0.1382	0	0	0	0	0	0	0	0.3418	0.0304	0	0	0	0	0.308	0	0	0
2.5501	255.099	0	0	0	0	0	0	0	0.2916	0	0	0	0	0	0	0.2609	0.1944	0.2416	0	0.3951	0	0	0.3297	0.3356	0.7902	0	0	0	0	0.1969	0.5376	0.2334	0.1935	0.2416	0.2699	0.2654	0.3192	0	0.5766	0.381	0.3524	0.2175	0.2183	0	0	0	0	0	0
0.7256	255.106	0	0	0	0	0	0	0	0.047	0.3518	0.4427	0.3179	0.2992	0.5285	0.5079	0.354	0.3419	0.416	0.3347	0.3098	0.1462	0.4726	0.3462	0.4078	0.766	0.1588	0.2927	0.2074	0.1517	1.1814	0.2399	0.3782	0.2844	0.1695	0.4546	0.4314	0.4831	0.3311	0.754	0.1402	0.2768	0.6152	0.2505	0	0.4431	0	0.3227	0.3954	0.4226
1.9502	255.085	0	0	0	0	0	0	0	0	0	0	0	0	0	0	0	0	0	0	0	0	0	0	0	0	0	0.2801	0.0619	0.0779	0	0.1455	0	0	0.0972	0.2998	0	0.1656	0.1631	0	0	0	0.1196	0	0	0	0	0	0	0
2.3411	255.084	0	0	0	0	0	0	0	0	0	0	0	0	0	0	0	0	0	0	0.5086	0	0	0.3113	0.3313	0	0	0.4368	0	0	0	0	0	0	0	0.1926	0	0	0.3891	0	0	0	0	0	0	0	0	0	0	0
0.4604	254.245	0	0	0	0	0	0	0	0.2801	0.3207	0.2915	0.3183	0.5174	0.4636	0	0	0	0	0	0	0	0	0	0	0	0	0	0	0	0	0	0	0	0	0	0	0	0.3623	0	0.29	0	0.3935	0	0.3976	0.5106	0.345	0	0	0.4108
0.8427	254.151	0	0	0	0	0	0	0	0	0	0	0	0	0	0	0	0	0	0	0	0	0	0	0	0	1.0725	0	0	0	0	0	0	0	0	0	0	0	0	0	0	0	0	0	0	0	0	0	0	0
1.2687	254.147	0	0	0	0	0	0	0	0	0	0	0	0	0	0	0	0	0	0	0	0.1943	0	0	0	0.1596	0	0	0	0	0	0	0	0	0	0	0	0	0	0	0	0	0	0	0	0	0	0	0	0
1.4928	254.139	0	0	0	0	0	0	0	0	0	0	0	0	0	0	0.3042	0	0.2206	0	0.3393	0	0	0	0.2061	0	0	0	0	0.2548	0	0	0	0	0	0	0	0.2345	0	0.3068	0.3236	0.0877	0	0	0	0	0	0	0	0
1.6475	254.138	0	0	0	0	0	0	0	0	0	0	0	0	0	0	0	0	1.1192	0	0	0	0.6079	1.5113	0	0.9052	0	0	0	1.2552	0	0.5267	0	0	0	0.2227	0	1.243	0	0	1.1346	0.4458	0	0	0	0	0	0	0	0
0.4539	111.081	0	0	0	0	0	0	0	0	0	0	0	0	0	0	0	0	0	0	0	0	0	0	0	0	0	0.8233	0	0	0	0	0	0	0	0	0	0	0	0.526	0	0	0	0	0	0	0	0.6196	0	0
1.2458	111.079	0	0	0	0	0	0	0	0	0	0	0	0	0	0.0282	0	0	0	0	0	0	0	0	0	0	0	0	0	0.1793	0	0.0806	0.2296	0	0	0	0	0	0	0	0	0	0	0	0	0	0	0	0	0
0.7299	111.075	0	0	0	0	0	0	0	0	0	0	0.0873	0	0	0.4153	0	0	0	0	0	0	0	0	0	0	0.4513	0.1204	0	0	0	0.1035	0	0	0	0	0	0	0	0.1105	0	0	0	0	0	0	0	0	0	0
2.1566	111.061	0	0	0	0	0	0	0	0	0	0	0	0	0	0	0	0	0	0	0	0	0	0	0	0	0	0	0	1.8509	0	0	0	0	0	0	0	0	0	0	0	0	0	0	0	0	0	0	0	0
0.9638	111.06	0	0	0	0	0	0	0	0	0	0	0	0	0	0	0.4946	1.0122	0	0.0352	0	0	0	0	0	0.1546	0	0	0	0	0.3273	0.0438	0	0	0.0325	0	0	0	0	0	0	0	0	0	0	0	0	0	0	0
2.7369	111.058	0	0.3747	0	0	0	0	0	0	0	0	0	0	0	0	0.1136	0.8973	0.9323	0.972	0.9601	0	0	1.3416	1.3343	0	0	0	0	0.0433	0.8092	0.031	0.4273	0.5906	3.5119	1.0144	1.0905	1.5676	0.3676	0.0383	0	0	0	0	0	0	0	0	0	0
3.2926	111.056	0	0	0	0	0.0781	0	0	0	0.0196	0	0	0	0	0	0	0	0	2.6563	0	0	0	0	0	0.5231	0	0	0.4873	0	0	0	0.4424	0	0	0	0	0	3.0733	0.0947	0	0	0	0	0.0505	0.0519	0.1677	0	0	0
2.9484	111.055	0	0	0	0	0	0	0	0	0	0	0	0	0	0	0	0.3623	0	0	0	0	0	0	0	0	0.6566	0	0	0	0	0	0	0	0	0.0822	1.605	1.1528	0	0	0	0	0	0	0	0	0	0.3321	0	0
3.5665	111.055	0	0	0	0	3.3167	0	0	0.1411	0.1126	0	0	0.1091	0	0.0041	0.2203	0	0	0	0.147	0	0	0	0.3018	0	0	0	0.1742	0	0.0014	0.1058	0	0.7894	0	0.1487	0	0	0.0503	0	0	0.0081	0.1193	0	0	0	0	0	0	0
0.4521	110.104	0	0	0	0	0	0	0	0	0	0	0	0	0	0	0	0.1845	0	0	0	0	0	0	0	0	0	0	0	0	0	0	0.1788	0	0	0	0	0	0	0	0	0	0	0	0	0	0	0	0.33	0
0.5427	110.06	0	0	0	0	0	0	0	34.1122	32.6089	30.2776	32.7286	30.8374	30.0871	35.3859	37.307	48.2047	29.0241	32.607	0	25.0954	30.9952	0.9569	1.5149	10.6264	27.0858	0.6333	22.8978	40.5666	30.1848	34.4882	34.8193	30.7865	31.7265	2.096	31.669	36.444	0	20.7691	0	42.216	26.9343	50.2317	76.0483	4.1009	26.1809	0	38.2324	16.3083
2.5042	110.06	0	0	0	0	0	0	0	0	0	0	0	0	0	0	0	0	0	0	0	0.6104	0	0	0	0.3951	0	0	0	0	0	0.5223	0	0	0	0.3177	0	0	0	0	0	0	0	0	0	0	0	0	0	0
3.0513	110.06	0	0	0	0	0	0	0	0	0.3097	0	0	0	0	2.1171	0.6221	0	0	0	0	0	0	1.0924	2.6053	0.8346	0	0.0613	0	0.8806	0	4.0035	0.7166	0	1.4978	2.0979	0.3032	1.0482	0	0	0	0	0	0	0	0	0	0	0	0
0.8023	110.048	0	0	0	0	0	0	0	0.8112	0.7173	0.7322	0.8763	0.7233	0.7338	3.7097	1.1592	1.4404	1.5213	0.6546	0.8786	1.2482	0.5449	1.3223	0.8268	0.8434	0.9994	2.0411	0.6918	1.3024	1.0467	1.2992	1.0051	1.1898	1.4544	4.5735	2.3947	1.066	1.0287	0.8174	0.748	0.0941	1.6214	0.2551	0.369	0	0.7002	0.6216	0	0.5123
1.6068	110.036	0	0	0	0	0	0	0	0	0	0	0	0	0	0.8852	0.9081	0.1979	0.6163	0.5365	1.0197	0.8331	0.591	0.2599	0.6905	0.5294	0.8948	1.1615	1.0001	0.6283	0.6001	0	0.5572	0.7551	0.6227	1.0684	0.6619	0.6103	1.1629	0	0.705	0	0.9783	0	0	0	0	0.895	0	0
1.1752	110.035	0	0	0	0	0	0	0	1.1573	1.0719	1.1091	1.1437	1.0781	0.9852	1.71	1.581	1.4489	1.484	0.9862	3.0343	1.1417	0	1.6451	1.1242	0.662	2.0278	2.7087	1.197	1.883	1.3659	1.15	0.9286	1.3509	1.4854	1.8076	1.055	0.8226	1.4411	1.3234	1.2998	0.5361	1.376	0.8296	0.5017	0	0.9977	1.7005	0	0
0.5019	957.17	0	0	0	0	0	0	0	0	0	0	0	0	0	0	0	0	0	0	0	0	0	0	0	0	0	0	0	0.1053	0.0515	0	0	0	0	0	0	0	0	0	0	0.0546	0	0	0	0	0	0	0	0
3.0938	956.542	0	0	0	0	0.5631	0	0	0.0658	0.1409	0.1867	0	0.1489	0	0.0336	0.1471	0.1486	0.0621	0.171	0.0891	0	0	0.1911	0	0.144	0	0.155	0.0831	0.0734	0.1547	0.1678	0	0.0738	0	0.0904	0	0.1545	0	0.1505	0.2386	0.0648	0.222	0.2252	0.1848	0	0	0	0.278	0.2697
3.0885	955.547	0	0	0	0	2.7458	0	0	0.3335	0.1723	0.3609	0.3321	0.2399	0	0	0.0831	0.0271	0.0583	0.0148	0.2578	0.0592	0	0.2156	0.1012	0.0711	0.21	0.3682	0.0092	0.1046	0.2268	0.0175	0.1578	0.1689	0.2616	0.35	0.1042	0.0172	0.1953	0.1194	0.1955	0	0.0977	0.6361	0.2214	0.3731	0.4165	0.1469	0.319	0.3481
1.1765	955.132	0	0	0	0	0	0	0	0	0	0	0	0	0	0	0	0	0	0	0	0	0	0	0	0	0	0	0	0	0	0.3934	0.2894	0	0	0	0	0	0	0	0	0	0	0	0	0	0	0	0	0
2.0837	954.571	0	0	0	0	0	0	0	0	0	0	0	0	0	0	0	0	0.1236	0.1244	0	0	0	0	0	0	0.098	0	0.1126	0	0	0	0	0	0	0.1453	0	0	0	0	0	0	0.1007	0	0	0	0	0	0	0
3.09	954.534	0	0	0	0	0	0	0	0.0901	0.1985	0.1646	0.1811	0.2219	0.144	0	0.1385	0.0666	0.1102	0.1239	0.0627	0.1199	0.1722	0	0.04	0.1055	0.1663	0.1724	0	0.0955	0.0571	0.1835	0	0.1588	0.1455	0.2045	0	0	0	0.0702	0.133	0.0562	0.1814	0.2481	0.16	0.3769	0.2654	0.0378	0.2693	0.2131
3.0904	954.488	0	0	0	0	0	0	0	0	0	0	0	0	0	0	0	0.1238	0	0	0	0	0	0.025	0	0.0095	0	0	0	0	0	0	0.0044	0	0.0601	0	0	0.0269	0	0.0085	0	0	0	0	0	0	0	0.0597	0.1057	0.0525
2.0704	953.574	0	0	0	0	0	0	0	0	0	0	0	0	0	0	0.0854	0	0	0	0	0	0.1245	0	0	0	0	0.1252	0	0	0	0	0	0	0.0996	0	0.094	0	0	0	0	0	0	0	0	0	0	0	0	0.1221
1.0744	953.335	0	0	0	0	0	0	0	0	0	0	0	0	0	0	0	0.1241	0.4172	0	0.1884	0.7743	0	0	0.3448	0	0.1075	0	0.0742	0.1607	0	0	0.3459	0	0	0	0	0.109	0	0	0.1798	0.3528	0.4207	0	0	0.2676	0	0	0.1374	0
0.551	953.211	0	0	0	0	0	0	0	0	0	0	0	0	0	0	0	0.0505	0	0	0	0	0	0	0	0	0	0	0	0.0765	0.0402	0	0.0531	0	0	0	0	0	0	0	0	0.046	0	0	0	0	0	0	0	0
0.4699	952.672	0	0	0	0	0	0	0	0	0	0	0	0	0	0	0	0	0	0	0	0	0	0	0	0	0	0	0	0	0	0	0	0.1198	0	0	0	0	0	0.1241	0	0	0	0	0	0	0	0	0	0
3.0834	952.608	2.4647	0.8508	0	0	0	0.5789	0	0	0	0	0	0.0116	0.0918	0	0.0901	0	0	0	0.0874	0	0	0.2348	0	0.0287	0	0	0.1256	0	0	0	0.1277	0.1072	0	0	0	0	0.2317	0	0.1261	0	0	0	0	0	0.0148	0	0	0
2.076	952.574	0	0	0	0	0	0	0	0	0	0	0	0	0	0	0	0.1103	0	0	0	0	0.0809	0	0	0	0	0	0	0	0	0	0	0	0	0.1972	0	0.0678	0.1528	0	0	0	0	0	0	0	0	0	0	0
3.0884	952.512	0	0	0	0	0	0	0	0	0	0	0	0.1827	0.2195	0	0.0055	0.1846	0.14	0.1235	0	0.0952	0.1491	0	0.116	0	0.0814	0.0527	0.0709	0	0.0167	0	0.0338	0	0.1275	0.134	0	0	0	0.0287	0.0929	0	0	0.2267	0	0.2846	0.2413	0	0.2694	0.1945
0.4473	950.695	0	0	0	0	0	0	0	0	0	0	0	0	0	0	0	0	0	0	0	0	0	0	0	0	0	0	0	0	0	0	0	0.0851	0	0	0	0	0	0	0	0	0	0	0	0	0	0	0	0
2.278	949.544	0	0	0	0	0	0	0	0	0	0	0.1751	0.2067	0	0	0	0	0	0	0	0	0	0	0	0	0	0	0	0	0	0	0	0	0	0	0	0	0	0	0	0.0835	0.2462	0.4024	0.6512	0.6148	0.2267	0.5422	0.4851	0.365
2.5698	413.268	0	0	0	0	0	0	0	0	0	0	0	0	0	0	0	0	0	0	0	0	0	0	0	0	0	0	0	0	0	0	0	0	0	0	0	0	0	0	0	0	0	0	0	0.8451	0	0	0	0
3.3406	413.266	21.6942	0	0	39.5322	29.1347	0	13.8454	0.219	0.0575	0.123	0	0	0.1209	0	0.0617	0	0	0	0	0	0	0	0	0	0	0	0	0	0	0.0385	0	0	0.0298	0	0	0	0.2778	0	0	0.0449	0	0	0	0	0	0.0182	0	0.196
1.7184	413.265	0	0	0	16.6184	41.5519	19.9547	0	0.7833	0	0	0	0	0	0	0.2319	0.3984	0	0.1666	0.2734	0	0	0	0	0	0	0	0	0	0	0	0	0	0	0	0	0	0	0.0885	0	0	0	0.5964	0.2477	0.4668	0.2124	0	0.7618	1.289
2.1663	413.264	0	0	0	0	0	0	0	0.4559	0.267	0	0.1441	0	0	0	0	0	0	0	0	0	0.1123	0.1755	0	0	0	0	0	0	0	0	0	0	0	0	0	0	0	0	0	0	0	0	0.6117	0	0	0	0	0
2.8768	413.263	54.3378	23.745	0	3.5586	31.5802	0	0	0.0974	0	0.6869	0	0.659	0.5068	0	0	0.0668	0	0.1862	0.1023	0.282	0.0219	0.0397	0.2243	0.131	0.2728	0.0899	0	0.0746	0	0	0.0092	0.1887	0.1721	0.7083	0.2029	0	0.0542	0.1448	0.3405	0.158	0.459	0.1346	0.0138	0.1521	0.5321	0	0.1195	0.1167
0.342	413.263	0	0	0	0	0	0	0	0.0388	0.1494	0	0.3958	0	0.3127	0	0	0	0	0	0	0.0485	0	0	0.1397	0	0	0.1769	0	0	0	0.2312	0.0631	0.1386	0	0	0	0	0	0	0	0	0	0	0	0	0	0	0	0.305
0.5282	413.263	0	66.288	0	19.5004	23.9541	32.8069	0	0	0	0	0	0	0	0	0	0	0	0	0	0	0	0.1384	0	0	0	0	0	0	0	0	0	0	0	0	0	0	0.1101	0.2619	0	0	0	0	0	0	0	0	0	0
1.0806	413.262	0	35.1656	44.513	23.5884	0	0	0	2.0126	0	0.5017	1.4048	1.5796	1.0608	1.1985	0.481	0.1673	0.6733	0.5487	1.5779	0.3497	0.1021	1.829	1.6284	0.898	1.2084	1.6989	0	0	0	1.2334	0	0.3482	1.0568	1.6854	1.0047	0	0.4152	1.9018	1.3683	0	1.0227	2.2386	0.972	1.641	0.9585	0.5552	1.4818	0.3499
1.5729	413.262	0	0	0	0	0	0	0	0	0	0	0	0	0	0	0	0	0	0	0	0	0	0	0	0	0	0	0	0	0	0	0	0	0	0	0	0	0	0	0	0	0	0.3397	0	0	0	0	0	0
2.3474	413.261	0	0	56.8413	0	0	0	21.586	0	0	0	0.4592	0	0	0	0	0	0	0	0	0	0	0	0	0	0	0	0	0	0	0	0	0	0	0	0	0	0	0.2579	0	0	0	0	0	0.2343	0	0	0.745	0
1.9066	413.26	0	0	0	0	0	26.8711	32.77	0	0.1825	0	0	0	0	0.1969	0	0	0	0	0	0.3165	0	0	0	0	0	0	0	0	0	0	0	0	0	0	0	0	0	0	0	0	0	0	0	0.2352	0	0	0.709	0.7153
1.2196	413.26	0	0	0	0	0	40.8894	0	0	0	0	0	0	0	0.1172	0	0	0	0	0	0	0	0	0	0	0	0.217	0	0	0	0	0	0	0	0.1653	0	0	0.1612	0.0364	0.1595	0	0.0722	0	0	1.415	0.0715	0.3494	0.2915	0
0.7314	413.259	0	0	0	0	0	44.927	0	0.7323	0	0	0	0	0.3606	0	0.2014	0	0.302	0.2529	0	0	0.1427	0.1453	0	0	0	0.1922	0.1399	0.359	0	0	0.0693	0.0342	0.4094	0.6539	0	0	0.3486	0.2598	0.2355	0.1841	0	0	0	0.4469	0	0	0.5034	0
2.6495	413.219	0	13.7266	0.0604	0	2.1554	0	0	0	0	0	0.162	0	0	0	0.0039	0.0003	0	0	0	0.0135	0	0	0	0	0.0041	0	0	0	0	0	0	0	0	0	0.0639	0.0122	0	0.026	0	0	0.6578	0	0	0	0	0	0	0
2.1627	413.178	0	0	0	0	0	0	0	0.1884	0	0.2125	0	0	0	0.1846	0.1252	0	0.1865	0	0	0.1749	0	0	0	0	0	0.1299	0	1.7622	0	0	0	0.3821	0	0	0	0	0.3432	0	0.0844	0	0	0	0	0	0	0	0	0
3.258	413.157	0	0	0	0	0	0	0	0	0	0	0.2761	0	0	0	0	0	0	0	0	0.171	0	0.0387	0.0179	0	0.3463	0	0.0064	0	0.1194	0.2883	0.1119	0.2924	0.3192	0	0	0	0	0	0	0.2897	0.6061	0	0	0	0	0.2623	0	0
2.2363	256.263	0	0	0	0	0	0	0	0	0	0	0	0	0	0	0	0	0	0	0	0	0	0	0	0	0	0	0	0.2572	0	0	0.3022	0	0	0	0	0	0	0.0816	0	0	0	0	0	0	0	0	0	0
1.8773	256.261	0	0	0	0	0	0	0	0	0	0	0	0.8404	0.064	0	0	0	0.3896	0	0	0.3987	0	0	0	0	0	0	0	0	0.0197	0.0323	0	0.4268	0.8199	0.0611	0	0.5511	0	0	0	0	0	0	0	0	0	0	0	0
1.2463	256.261	0	0	0	0	0	0	0	0	1.0472	0	0	0	0	0	0	0	0	0.1382	0	0	0	0	0.9059	2.9759	0	0	1.0424	0.3692	1.139	0	0	0	0	0	0	0	0	0.743	0	0	0	0	0	0	0.0801	0	0	0.1424
3.4782	256.257	0	0	46.2316	0	0	0	0	0	0	0.0936	0.6335	0	0	0	0	0	0	0	0	0	0	0	0	0.0507	0	0.0737	0	0	0	0.2191	0	0	0	0	0	0	0	0.0465	0.0568	0	0	0	0	0.0407	0	0	0	0
3.3424	256.157	0	0	0	0.1234	0	0	0	0	0.2244	0.1584	0.1534	0	0	0	0	0	0	0.7681	0.0153	0	0	0	0	0	0	0	7.1477	0.1622	0	0	0.9904	0.1819	0.0477	0.3705	0.0469	0	0.0532	0	1.092	0	0	0	0	0	0.155	0	0	0
3.2323	256.115	0	1.6816	0	0	0	0.1021	0	0	1.0679	0	0	0	0	4.1182	0	0	0	0	0	0	0	0	0	0	0	0.9872	0	0	0.2399	6.7354	0.917	0	1.3702	0	0	2.6872	3.8698	1.1554	0	0	0	0	0	0	0	0	0.1299	0
2.6002	256.104	0	0	0	0	0	0	0	0	0	0	0	0	0	0	1.243	1.3598	0	0	2.4648	1.2921	1.2146	2.0195	1.8218	2.0328	1.9921	0	1.2702	1.4996	1.5907	1.3437	0.9429	1.3627	0	1.8877	1.131	1.4225	2.5619	1.9722	2.0022	0	0	0	0	0	0	0	0	0
1.1754	256.024	0	0	0	0	0	0	0	0	0	0	0	0	0	0	0	0	0	0	0	0	0	0	0	0	0	0	0	0	0	0.7101	0.441	0	0	0	0	0	0	0	0	0	0	0	0	0	0	0	0	0
0.536	255.214	0	0	0	0	0	0	0	0	0	0	0	0	0	0.19	0	0	0	0	0	0	0	0.577	0	0	0	0	0	0	0	0.0998	0	0	0	0	0	0	0	0	0	0	0	0	0	0	0.2913	0	0	0
2.2521	255.211	0	0	0	0	0	0	0	0.2634	0.2789	0.5444	0.4339	0.3869	0.3171	0.6876	0.427	0.4254	0.1652	0	0.5538	0.1494	0	0.6263	0.3451	0	0.2224	0.2037	0.255	0.1991	0.3203	0.4871	0.511	0.9139	0.518	0.5623	0.3421	0.3767	0.5153	0.4535	0.5557	0.4154	0	0	0	0	0.3264	0.7177	0	0
2.0862	255.21	0	0	0	0	0	0	0	0.1898	0.2084	0.166	0.2329	0.2429	0.2469	0.216	0.2189	0.8374	0.3457	0.4953	1.38	0.549	0.0969	1.0366	0.1556	0	0.7356	0	0.5565	0.3326	0	0.1919	0.1546	0.378	0.4382	0.3531	0	0.1256	0	0.511	0.4338	0	0.5281	0	0	0	0.5139	0.4824	0	0
1.0528	255.207	0	0	0	0	0	0	0	0	0.1659	0.1362	0.1682	0	0	0	0.4532	0.3954	0.1537	0.2656	0.2792	0.1363	0.1247	0.3155	0.2018	0	0	0	0	0.4918	0.1791	0	0	0.2876	0.4514	0.1847	0.1372	0.1616	0	0.5501	0	0	0	0	0.3651	0	0.3327	0	0	0.1366
0.5703	255.161	0	0	0	0	0	0	0	0	0	0	0	0	0	0	0.2739	0	0	0	0.3361	0	0	0	0.2717	0	0	0	0	0	0	0	0	0	0	0.2824	0	0	0	0	0.2071	0	0.3785	0	0	0	0	0	0	0
1.4229	255.16	0	0	0	0	0	0	0	0.7695	0.6713	0.6668	1.0761	0.6443	0.6511	1.1018	1.0121	0	0.4443	1.4045	0.763	0.6418	0.4645	0	0.2977	0	0.6613	0.1665	0.502	0.0613	0.3085	0	0.8233	0.7118	0	0.9276	0	0.4335	0.8467	0.7636	1.0194	0.3994	0.7964	0.7649	0.6119	0.1256	1.7307	0.7622	0.5594	0
1.2711	255.159	0	0	0	0	0	0	0	0.3815	0.291	0.3076	0.2485	0.1898	0.2824	0	0.3442	0.5874	0.1994	0	0.3857	0.4854	0	0.4938	0	0	0.3359	0.2703	0	0.1822	0.4151	0.4129	0.282	0.3514	0.4387	0.6841	0.2055	0.1682	0.6125	0.3603	0.3701	0.1039	0.5719	0	0.2822	0	0.4309	0	0	0
3.3451	255.149	0.3182	0	0	0	0.3794	0	0	0.2246	0	0.1978	0.0632	0	0.0825	0.2304	0.3226	0.1207	0	0	0	0	0	0	0	0	0	0	4.5485	0	0.0718	0	0.4151	0	0.1146	0.2969	0	0	0.1201	0	0.811	0.1175	0	0	0	0	0	0.0859	0	0
3.0731	112.896	0	0	0	0.5969	0	0	0	0.3589	0.3197	0	0.3488	0	0.8351	0.3271	0.688	0.8886	0.6722	0	1.0285	0.6358	0.8364	0.2536	0.3855	0.1473	0	0.9013	0	0.366	0	0.656	0.156	0	0	0.9273	0	0	0	0.8724	0	0.3643	1.1262	1.1397	0.5181	0	0	0.3953	0	0
0.5778	112.112	0	0	0	0	0	0	0	0	0	0	0	0	0	0	0	0	0	0	0	0	0	0	0	0	0	0	0	0	0	0	0	0	0	0	0	0	0	0	0	0	0	0	0	0	0	0	0	0
1.0916	112.087	0	0	0	0	0	0	0	0	0	0	0	0	0	0.8287	0	0.1999	0	0	0	0.2819	0	1.1948	0	0	0.173	0.275	0	0	0	0	0	0	0	0	0.2639	0	0	0	0	0	0	0	0	0	0	0	0	0
0.5523	112.075	0	0	0	0	0	0	0	0	0.3405	0	0	0	0	0.188	0.1493	0	0	0	0	0.0701	0	0	0.3075	0	0	0	0	0.0446	0	0	0	0	1.8216	0.2797	0.1354	0	0	0	0.4746	0	0.1427	0	0	0	0	0	0	0.3325
0.7435	112.064	0	0	0	0	0	0	0	0.2646	0.2377	0.263	0.214	0.2346	0	0	0	0.7698	0.1966	0.3032	0.2619	0.389	0.4535	0.3156	0.3343	0.3545	0.289	0.4643	0.1637	0	0.0768	0	0	0.4207	0.6065	0	0.4504	0.3925	0.2451	1.5598	0.235	0.2121	0.3617	0	0.4479	0	0.4298	0	0	0
3.4698	112.052	0	0	0	0	0	0	0	0.2706	0	0	0.2931	0	0	0.4458	0.1256	0.2071	0	0	0	0	0	0.1911	0.5162	0.6179	1.284	0.3933	0.3278	0.7387	1.1311	0.6498	0	0.6203	0	0.2284	0.789	0	0	0.2735	0.4176	0.0233	0	0.2255	0.1383	0.0939	0.4257	0	0	0
1.652	112.051	0	0	0	0	0	0	0	0.8643	0.7641	0.6529	0.7311	0.6531	0.5541	1.9304	0.3548	0	0.4682	0.4809	0.7284	0.3872	0.4302	0.8146	0.9006	0.5333	0.7905	0.9104	0.51	0.6087	0.5903	1.1649	0.4036	0.3721	0.851	1.8872	0.5656	0.6015	1.0599	2.0588	0.7092	0.4106	0	0.3835	0	0.5776	0	0.6307	0.2771	0.5295
1.309	112.051	0	0	0	0	0	0	0	2.602	2.3644	3.7212	2.3095	3.4851	3.6771	4.7225	4.2572	2.9439	4.2639	3.2081	5.1924	4.7913	1.9328	4.5001	3.1601	3.0248	5.2584	5.6887	2.6468	5.1394	4.2282	3.6729	2.5914	5.0868	4.263	5.163	3.7495	5.7154	4.3067	11.3381	4.5636	2.6911	4.6233	2.0878	1.26	4.2633	3.2722	3.3779	2.9632	2.4527
3.0859	112.052	0	0	0	0.3248	0	0	0	0.2574	0.2904	0.205	0.8945	0.2671	0.6769	0	0.17	0.5758	0.1729	0.0119	0	0.5657	0.3873	0	0	0.3842	0	0.1791	0	0	0	0.0071	0	0	0	0	0	0	0	0.2669	0	0.372	0.7773	1.0141	0.2102	0	0	0.0448	1.0394	0.348
1.0378	112.04	0	0	0	0	0	0	0	0	0	0.2075	0.1997	0.1621	0	0.4616	0	0	0.1138	0	0	0	0.1402	0.4573	0.5037	0.3183	0.1572	0	0	0.324	0.1149	0.5146	0.161	0	0.294	0.4038	0.2693	0.4438	0	0	0	0	0.2389	0	0	0	0	0	0	0
2.3858	112.036	0	0	0	0	0	0	0	0.4669	0.6199	0.6219	0.6595	0.6648	0.4163	0.5483	0.5179	0.6009	0.926	0.4624	0.5435	0.459	1.1018	0.4837	0.8271	0.328	0.5751	0.5133	0.4931	1.5644	0.874	0.6463	1.1571	0.9403	2.085	0.5813	0.9821	1.0725	1.1736	0.9341	0	0.9922	0.4174	0.4031	0.794	0.3886	0.5014	0.4234	0.6087	0.4766
3.1112	111.864	0	0	0.6135	0	0	0	0	0	0	0	0	0	0	0.0188	0	0	0	0	0	0	0	0	0	0	0	0	0	0	0	0	0	0.0656	0	0	0.1005	0.0423	0	0	0	0	0.0366	0.0078	0	0	0	0	0	0
3.1048	111.625	0	0.2696	0	0	0.2892	0	0	0	0	0	0	0	0.0298	0	0	0.0929	0	0.0662	0	0	0.0776	0	0	0	0	0	0	0.013	0.085	0.0374	0	0.0063	0	0	0.1112	0.0583	0	0	0	0.0095	0	0	0	0	0	0	0	0
3.0987	111.484	0	0	0	0.5598	0	0	0	0	0	0	0	0	0.0219	0	0	0	0	0	0.0412	0	0	0	0	0	0	0	0	0	0.071	0.0388	0	0	0	0	0	0.0747	0	0.0134	0	0	0.0587	0	0	0	0	0	0	0
1.5963	111.117	0	0	0	0	0	0	0	0	0	0	0	0	0	0	0	0	0.6221	0	0.9848	0.6199	0	0	0.78	0.7071	0	0	0	0	0	0	0.3884	0	0	0	0	0	0	0	0	0	0	0	0	0	0	0	0	0
1.8126	111.102	0	0	0	0	0	0	0	0	0	0	0.5001	0	0	0.5331	0.876	0.6306	1.5263	0	3.0177	1.8811	0.7431	0.7706	1.0722	1.0068	0.4446	0.8834	0.7788	0.7597	0	0	1.1965	1.0511	0.5606	0.8617	1.0676	1.1034	0.8898	0.7666	1.08	0.5636	1.7678	0	0	0	0.5383	0	0	0
0.4369	973.158	0	0	0	0	0	0	0	0	0	0	0	0	0	0	0	0	0	0	0	0	0	0	0	0	0	0	0	0	0	0	0	0	0	0	0.1559	0	0	0.2839	0.8359	0	0	0	0.3098	0	0	0	0	0
0.4965	972.175	0	0	0	0	0	0	0	0	0	0	0	0	0	0	0	0	0.059	0	0	0.0378	0	0	0	0	0	0	0	0.1189	0.0947	0	0	0.0509	0	0	0	0	0	0	0	0.0691	0	0	0	0	0	0	0	0
3.0592	971.596	0	0	0	0	0	0	0.4535	0	0.0542	0	0	0	0.038	0	0.1313	0	0.1286	0.0382	0.081	0	0.0305	0.0824	0.2329	0	0	0	0.0427	0.0635	0.0459	0.0385	0.0372	0	0	0.0608	0.1014	0	0.5052	0.0428	0	0	0	0.0467	0	0.0854	0.0548	0	0	0
1.0755	969.306	0	0	0	0	0	0	0	0	0	0	0	0	0	0	0	0	0.055	0	0	0.0888	0	0	0	0	0	0	0	0	0	0	0	0	0	0	0	0	0	0	0	0	0	0	0	0	0	0	0	0
3.0922	968.531	0	0	0.5645	0	0	0	0	1.2084	0.69	0.9048	1.1966	0.8064	1.3941	0.8186	1.2566	1.8521	0.9792	0.9885	2.0112	1.6157	1.6465	1.1826	1.1165	0.7379	0.9734	1.7449	0.3855	0.8571	1.5404	1.4673	0.863	1.6906	0.5794	1.6513	1.9106	1.4604	0.7394	1.1257	0.7671	0.4528	1.686	1.6636	0.5609	1.6068	1.6442	0.3111	0.8899	1.2268
1.1288	967.528	0	0	0	0	0	0	0	0	0	0	0	0	0	0	0	0	0	0	0	0	0	0	0	0	0	0	0	0	0	0	0	0	0	0	0	0	0	0	0	0	0	0	0	0	0.102	0	0	0
0.4749	966.691	0	0	0	0	0	0	0	0	0	0	0	0	0	0	0	0	0	0	0	0	0	0	0	0	0	0	0	0	0	0	0	0.1458	0	0	0	0	0	0.1711	0	0	0	0	0	0	0	0	0	0
0.4431	964.713	0	0	0	0	0	0	0	0	0	0	0	0	0	0	0	0	0	0	0	0.0575	0	0	0	0	0	0	0	0	0	0	0	0.1045	0	0	0	0	0	0	0	0	0	0	0	0	0	0	0	0
1.7926	963.345	0	0	0	0	0	0	0	0	0	0	0	0	0	0	0	0	0.3504	0	0.7679	0.3545	0.1133	0	0.3932	0.3031	0.0774	0	0	0.0644	0	0	0.2011	0	0	0	0	0	0	0	0.1455	0.1419	0.274	0	0	0.1971	0	0.2468	0	0
3.0911	962.535	0	0	0	0	0	0	0	15.1371	16.6228	16.78	18.541	17.8068	17.7853	13.0268	16.3044	27.0887	11.6413	18.7976	8.1512	18.2946	20.478	18.3716	15.9135	12.2799	16.6155	22.2542	7.4214	12.9699	23.1222	22.2011	13.4098	22.4458	17.053	21.897	26.2655	20.1693	9.8175	22.0972	13.4656	5.6609	28.108	25.9044	10.1169	23.3199	18.0172	4.1785	18.8486	21.5286
3.0876	961.534	0	0	0	0	0	0	0.0989	0.1493	0.5896	0.4236	0.3856	0.2627	0.205	0	0	0.0148	0	0.2781	0	0.0821	0.142	0.3509	0.0968	0.1326	0.1985	0.3069	0.052	0.068	0	0.0213	0.1098	0.2241	0.1162	0.3303	0	0	0	0.2066	0.1245	0	0.1528	0.1733	0.2524	0	0.3225	0.1898	0.4327	0.2454
0.5677	961.219	0	0	0	0	0	0	0	0	0	0	0	0	0	0	0	0	0	0	0	0	0	0	0	0	0	0	0	0.2069	0	0	0.1371	0	0.1012	0	0	0	0	0	0	0	0	0	0	0	0	0	0	0
3.0871	960.529	0	0.6869	0	0	0	0	0	0.2856	0.3445	0.3099	0.4287	0.3669	0.1668	0.4789	0.2235	0.3404	0.2069	0.3183	0.1872	0.1819	0.2307	0.2409	0.234	0.114	0.2496	0.2244	0.165	0.0915	0	0.1857	0	0	0.0842	0.3829	0.1588	0	0.3819	0.0252	0.1079	0.0998	0	0.505	0	0.4868	0.2993	0.2785	0.0506	0.4351
3.0759	959.529	0.2218	0	0.401	0	0	0	0	0.082	0	0	0	0	0	0	0.073	0	0	0.0403	0	0	0	0	0	0.0317	0	0	0	0.0186	0	0.0404	0	0.0204	0.0607	0	0	0.0113	0.0798	0	0	0	0.0816	0	0	0	0	0	0	0
3.09	958.536	0.0005	0	1.6236	0	0	0	0	0.0921	0.0497	0	0	0	0	0	0.0857	0.1732	0	0.1078	0.0419	0	0	0	0.0718	0	0	0	0	0	0.0122	0.0484	0.0072	0	0.0898	0.0953	0	0.0941	0	0	0	0	0	0.1479	0	0	0	0	0	0
3.0883	957.547	0	0	0	0	0.4886	0	0	0	0.1617	0.1754	0.1076	0.1977	0	0.0291	0.0085	0	0	0.0417	0.1037	0	0	0	0	0.0482	0	0	0	0.0513	0.1634	0.0053	0.0704	0	0	0	0	0	0	0.146	0	0.0661	0	0	0.0477	0.1548	0	0.0575	0	0
1.9951	415.139	0	0	0	0	0	0	0	1.3318	1.2548	1.1614	1.2165	1.3675	1.3806	0	0	0	0	0	0	0	0.6133	0	0	15.2136	0	0	1.991	0	19.4905	0	0	0	0	0	0	5.5068	0	1.46	0	8.6083	0	0	0	0	0	0	0	0
2.3949	415.139	0	0	0	0	0	0	0	0.2228	0.2096	0.2193	0	0.4171	0	0	0	0	0	0	0	0	0.0552	0	0	0.7905	0	0	3.2342	0	3.9193	0	0	0	0	0	0	1.2451	0	0	0	2.2746	0	0	0	0	0	0	0	0
1.0638	415.137	0	0	0	0	0	0	0	0	0	0	0	0	0	0	0	0	0	0	0	0	0	0	0	0	0	0	0	0	0.4371	0	0	0	0	0	0	0	0	0	0	0.3684	0	0	0	0	0	0	0	0
0.5042	415.081	0	0	0	0	0	0	0	0	0	0	0	0	0	0	0.0434	0	0.0653	0	0	0	0	0	0	0	0	0	0	0.1263	0.0958	0	0.0411	0.1034	0.0773	0	0	0.1456	0	0	0	0.1173	0	0	0	0	0	0	0	0
0.9927	414.335	0	0	0	0	0	0	0	0.2567	0	0.285	0	0.3271	0.3766	0	0	0	0	0	0	0.655	0	0	0	0	1.2433	0	2.895	0.2241	0	0.9197	0	0	0.9278	0.9044	0	1.1432	0	0	0	0	0	0	0	0	0	0	0	0
1.4176	414.299	0	0	0	0	0	0	0	0.2438	0.1928	0.2147	0.2127	0.2191	0.2391	0.9443	0	0	0	0.4914	0.8354	0.1177	0	0.1027	0.2629	0	0.169	0.7458	0	0	0	0.9697	0	0	0.3759	0.4037	0	0	0.5531	0	0.6583	0	1.5227	0	0	0	0.2624	0	0	0
2.9907	414.296	0	0.5546	0	0	0	0	0	0.2497	0.069	0	0	0	0	0.217	0	0	0	0	0.2984	0.262	0	0	0	0.3411	0	0	0.0627	0.1666	0.2692	0	0	0	0	0	0.221	0.5449	0	0.1995	0	0	0.2616	0	0	0	0	0	0	0
0.5006	414.268	0	0	0	0	0	0	0	0	0	0	0	0	0	0	0	0	0	0	0	0	0	0	0	0	0	0	0	0	0	0	0	0	0	0	0	0	0	0	0	0	0	0	0	0	0	0	0	0
3.1506	414.188	0	12.8188	0	0	0	0	0	0.5563	0.1362	1.2169	1.2603	0.1371	0.7796	1.1585	1.8848	0.2687	1.8043	0.5563	0.7195	1.8326	0.6557	0.5241	1.4058	0.1813	3.0695	0.6731	0.8009	0.4133	0.3155	0.7393	0.4157	0.4766	0.8053	0.2009	0.4224	0.4812	1.7663	0.8815	0.7866	0.06	0.6296	0.8632	0.7099	2.3368	0	3.1473	5.0894	2.7035
3.5267	414.187	0	1.8518	0	0	0	0	8.4387	0	0	0	0	0.0381	0	0.1298	0.0803	0	0	0	0.0377	0	0	0	0	0.1521	0.1336	0	0.032	0	0	0.0306	0	0.1165	0	0.1168	0	0	0	0	0.1439	0	0	0.2411	0.0924	0	0.1936	0	0.1627	0
0.9283	414.185	0	0	0	0	0	0	0	0	0	0	0	0	0	0.3291	0	0	0	0	0	0	0	0.1371	0	0	0	0	0	0	0	0.2508	0	0	0	0	0	0	0	0	0	0	0	0	0	0	0	0	0	0
2.9444	414.174	0	0	0	0	0	0	4.9609	0	0	0	0	0	0	0	0.216	0.4092	0.0418	0.2237	0	0	0	0.0663	0.3531	0.2512	0	0	0	0.0654	0	0	0	0	0	0	0	0	0	0.0655	0.0612	0	0.0764	0.2627	0.236	0	0	0	0	0
0.4327	414.156	0	0	0	0	0	0	0	0	0	0	0	0	0	0.2333	0	0	0	0	0	0	0	0	0	0	0	0	0	0	0	0	0	0	0	0	0	0	0	0	0	0	0.1861	0	0	0	0	0	0	0
0.4354	414.1	0	0	0	0	0	0	0	0.1766	0.0955	0.1431	0	0.1769	0.1478	0	0	0.1213	0	0	0.1407	0.3186	0.3671	0	0.1368	0.1293	0.2359	0.15	0.1557	0.1436	0.1213	0.2721	0.0767	0.2378	0.1069	0	0	0.3319	0.1281	0.3524	0.4361	0.1759	0.0809	0	0.2246	0	0	0	0.1064	0.3826
0.4613	413.323	0	0	0	0	0	0	0	0	0.1429	0.0935	0	0	0	0.1393	0	0	0	0	0	0.064	0	0	0.0998	0	0	0	0	0	0	0	0	0	0	0	0	0	0	0	0	0	0.105	0	0	0	0	0	0	0
3.0805	413.299	0	0	0	0	0	0	0	0.6699	0	0.7399	0.765	0	0.4633	0	0.0653	0.0857	0.042	0	0.0206	0	0	0.092	0	0.0817	0.276	0.0428	0	0.0497	0.381	0.0288	0.0081	0.0784	0.2199	0.1666	0.712	0.0353	0.5515	0.2561	0	0	0	0.5799	0.9229	0.8598	0.4047	0	0.2472	1.0877
1.8463	257.15	0	0	0	0	0	0	0	11.6503	9.7063	9.4036	10.0194	9.2162	9.8807	15.9947	29.3326	13.5017	29.183	6.1393	42.9077	9.5717	2.6653	20.2281	42.9152	6.6669	12.0605	5.962	25.385	28.2282	12.1898	9.7049	6.9885	20.0688	17.4739	18.0975	6.8392	19.4218	26.2934	24.069	40.5572	10.1077	5.3327	7.5796	3.3108	2.8001	3.5711	10.5754	0	2.2866
2.7514	257.148	0	0	0	0	0	0	0	0	0.2952	0	0	0	0	0	0	0	0	0	0	0.0944	0.0948	0.0789	2.957	0	0	0.7884	0	1.5627	0.2278	0.2767	0	0.4369	0	0.1759	0	0	0	0.4549	0.1279	0.1812	0.1184	0	0	0	0	0.0555	0	0
3.463	257.147	0	0	9.803	0	0	0	0	0	0	0.732	0.9773	0	0	0	1.0164	0	0.0379	2.123	0	0	0	0	2.0401	2.0072	11.2814	0	1.9618	4.1462	1.374	1.1337	0	1.4081	1.3882	0	0	0	6.2681	1.0038	1.2566	0	0	0	0.3042	0	2.0662	0	0	0
1.2284	257.113	0	0	0	0	0	0	0	1.607	1.6071	1.4395	1.504	1.5399	1.4159	0	14.3388	6.5972	1.533	2.2577	0	2.5873	0.1889	0	0	0	0	0	1.5756	0.2781	0.3793	0	0	5.7443	0	0	3.3864	0.5845	2.6049	0.7973	0	1.3039	0	5.4843	0	4.6045	0.6535	0	2.464	1.6155
0.9182	257.1	0	0	0	0	0	0	0	0	0	0	0	0	0	0	0	0	0	0	0	0	0	0	0	0	0	0	0	0	0	0	0	0	0	0	0	0	0	0	0	0	0	0.8264	0	0	0	0	0	0
2.1453	257.074	0	0	0	0	0	0	0	3.2404	3.2406	3.0614	3.2315	2.9725	2.9141	4.2571	1.8949	1.629	1.4487	2.0996	4.4741	2.4202	1.9013	2.6246	2.6327	2.1734	4.9271	10.5184	4.2411	0.9607	2.3301	3.4158	4.8018	1.8778	2.1585	4.0081	4.172	5.5255	0	4.1618	3.1386	1.8585	3.9144	0	0	0	2.1076	4.521	0	0
0.5972	257.072	0	0	0	0	0	0	0	0	0	0	0	0	0	0	0	0	0	0	0	0	0	0.3318	0.1823	0	0	0	0	0.2106	0	0	0	0	0.2591	0.4393	0	0	0	0	0	0	0	0	0	0	0	0	0	0
3.0997	256.301	0	0	1.7491	0	0.0475	0	0	0	0	0	0	0.0606	0	0	0	0	0	0	0	0	0	0	0	0	0	0	0	0	0	0	0	0	0.0906	0	0	0	0	0	0	0.0192	0	0	0	0	0.0237	0.0797	0	0
0.5817	256.297	197.544	65.4297	196.962	105.365	147.152	144.855	0	2.4951	0	2.4903	0.195	0	0	0	0	0	0.1393	2.3972	0	0	0	1.9845	0.6722	0.9065	1.8868	0	0.5143	0	0	0	0	0	0	0	0	0	0	0	0	0	0	0	0.797	0	0	0	4.0029	0
3.2501	256.264	26.2463	0	0	0	33.7823	31.4799	0	0	2.0275	0	1.7597	0.0754	0	0	0	0	0.351	0	0	0	0	0	2.0341	0	0	0	0.1489	0	0	0	0	0	0.2328	0	0.9757	0	0	0	1.4616	0.2287	1.2915	0	0	0	0	1.6556	1.2214	0
1.0095	256.264	28.2121	0	0	19.6936	0	0	0	0	0	0	0	0	0	6.4176	0.0324	0	0	3.8086	0	0	0.1251	0	0	0	0	0	1.1761	0	0	0	0	0	0	0	0.1216	0	2.1527	0	0	0	0	0	1.2219	0	0	2.9714	0	0
2.0982	256.263	0	0	0	0	0	0	0	0	0	0	0	0	0	0	0	0	0	2.473	0	0	0	0	1.6479	0	0	0	0	0	0	0	0.3022	0	2.6441	0	0	0	1.9658	0	0	0	0	0	5.3864	0	0	3.1302	0	0
2.8071	256.263	0	15.1221	16.4761	0	0	0	0	0.1513	0.1159	1.6153	1.2475	0.8355	5.9977	0.9472	0.9625	0.0923	0.0855	1.4125	1.611	0.4865	0.0904	0.3535	0.0533	1.4896	3.6655	0	0.2486	2.6299	0.3681	0.0608	0.0736	0.2485	0	0.7691	1.3103	0.9091	0.3681	6.075	2.2164	1.1657	1.9577	1.1218	0	0	0.4331	0.4125	0.2279	0.488
2.559	256.263	0	0	0	0	0	0	0	0	0	0.8905	0	1.403	0	0	0	0.1795	0	0	0	0	0	0	0	0	0	0	0	0	0	0	0	0	0.8804	0	0	0	0	0	0	0	0	0	0	3.2746	0	0	0	0
1.6117	256.263	0	0	0	0	0	0	0	0	1.2865	0	0	1.0525	0	0.1505	0	0.7969	0	2.2226	3.2871	0	0.671	3.0715	2.085	0	3.8794	0	0	0	0	0	0	0	2.9803	2.4771	0	0	0.0774	0.2605	3.7005	0	0	9.5245	1.2532	4.0181	7.8244	2.3539	3.7032	5.7089
0.3705	256.263	0	0	0	0	0	0	0	0	0	0	0.7876	0	0	0	0	0	0.2256	0.4146	0	0	0	0	0	0.9065	0	0	0	0.1101	0.6161	0	0.0239	0	0	0	0	0	0	0	0	0	0	0.0685	0	0	0	0	0	0
2.7519	114.067	0	0	0	0	0	1.6965	0	5.3712	5.21	4.7766	5.4629	6.5022	6.321	5.8505	13.3245	0.3263	6.7147	3.7211	7.5493	14.4428	6.0922	14.6627	11.2999	5.1569	5.0315	9.36	10.8818	10.8994	4.4477	11.0053	5.1686	12.8856	10.3722	8.5516	2.6681	6.2158	7.0655	9.72	13.8828	4.0101	7.1022	5.4297	1.7793	3.6934	4.9562	5.2538	5.6191	6.4243
2.9707	114.067	0	0	0	0	0	0	0.81	0	0	0.4942	0	0	0.6286	0	1.0524	0.4174	0	0	0.9431	1.3565	0	1.343	1.6158	0.5114	0.9042	1.4143	0.6742	0.9336	0.0914	0	0.6049	0.5581	0.5961	0.6369	0	0.5175	0.7429	0.4488	0.8162	0.4615	0.4367	0.3877	0	0	0.2921	0	0.6559	0.4515
1.8495	114.066	0	0	0	0	0	0	0	0.4719	0.2451	0.3588	0.1272	0.0929	0.1446	0	0	0.8341	0	0	0	0	0	0.1402	0	0	0	0	0	0.4276	0	0	0	0	0	0	0	0	0	0	0	0	0	0.6975	0.4268	0	0.2806	0.4825	0	0
1.1008	114.066	0	0	0	0	0	0	0	0.5227	0.5202	0.5633	0.934	0.9006	0.5604	0.6059	2.1714	0.8554	1.0457	0.6007	0.4138	1.5176	0.6952	1.4161	1.6349	0.6072	0.1766	0.7328	1.3302	0.6069	0.603	0.9843	0.3951	0.0701	0.6796	0.5265	0	1.1597	1.6821	0.403	0.6308	0.354	0.8592	1.0979	0.3991	1.1949	0	0	1.0737	0.9185
2.4386	114.066	0	0	0	0	0	0	0	0	0	1.966	0.2095	0	0	0	2.7837	2.2313	2.2649	0.1657	2.8368	0	1.6316	0	0	1.5566	0.6657	1.5846	5.5903	0	0.1187	0	1.2961	0	0	2.352	4.4645	1.9671	9.0443	2.3104	0	1.6636	2.1241	1.8067	0	3.1308	0	0	1.3232	2.3657
0.9359	114.066	0	0	0	0	0	0	0	1.11	0.7433	0.3448	0.3781	0.3196	0.9822	1.2267	1.3669	1.1465	1.0676	0.8419	1.3519	0.6233	0	0.7011	0.5212	0.6915	1.4478	0.3095	0.6559	0.7818	0.8538	0.8406	0.7011	3.9217	0.9477	0.5285	1.6322	1.1579	1.4287	0.2137	1.6825	0.3929	0.2537	1.4218	0.4903	0	0	0.7566	0	0
3.4253	114.065	0	0	0	0	0	0.8067	0	0	0	0	0	0	0.0162	0.5536	0.0126	0	0	0	0.6144	0	0.1608	0	0.1281	0	0	0.1902	0.3906	0	0	0.4302	0	0	0	0	0	0.2835	0.9103	0	0.3533	0	0	0	0	0	0	0	0	0
3.2979	114.063	0.0212	0	0	0	0	0	0	0	0	0	0	0	0.0748	0	0.0815	0.1522	0.1639	0	0.0214	0	0	0	0	0	0.2487	0	0.0949	0	0	0	0	0	0.1304	0	0	0	0	0	0	0	0	0	0.0109	0	0	0.4971	0	0
0.9204	113.965	0	0	0	0	0	0	0	0.2313	0	0	0	0	0	0.2364	0	0.1324	0.1381	0.113	0.1224	0	0.1241	0	0.1086	0.0859	0	0.1424	0.0702	0	0	0.1238	0	0.1002	0.0659	0.1382	0	0	0.1511	0.1231	0.1006	0.0643	0.1429	0	0	0	0	0	0	0
1.837	113.096	0	0	0	0	0	0	0	0.2883	0.2574	0.267	0.3081	0.3184	0.2672	0	0	0.2045	0	0	0	0	0.4114	0	0	0.4511	0.3936	0.5856	0	0	0	0	0.5214	0	0.2302	0.2272	0.4401	0	0.2617	0	0	0.3344	0	0.541	0.5391	0.3508	0.3285	0.3584	0	0.3179
2.0787	113.064	0	0	0	0	0	0	0	0	0	0.4126	0	0	0	0	0	0	0	0	0	0	0	0	0	0.2076	0	0	0	0.1937	0	0	0	0	0	0	0	0	0	0.3658	0	0.1045	0	0	0	0	0	0	0	0
0.561	113.061	0	0	0	0	0	0	0	0	0.4836	0	0	0	0	0.2071	0.3106	0.0937	0.1418	0.1961	0.744	0.4032	0	0.3157	0.1561	0	0	0.4298	0.2221	0.1108	0.0631	0.0762	0.047	0.2311	0	0.5386	0.1868	0.0566	0.3861	0.3254	0.244	0	0.1446	0	0	0	0	0	0	0.7197
0.7515	113.057	0	0	0	0	0	0	0	0.5992	0.7749	0.6297	0.6486	0.1649	0.4684	0	0.1317	0.6556	0.7576	0.3115	0.1092	0.1626	0	0.8973	0.1224	0.3916	0.1258	1.0758	0.4277	0.1304	0.4215	0.5641	0.468	0.788	0.5546	0.3869	0.3597	0.0606	0.5044	0.4909	0.4958	0.2545	0.5268	1.0431	0	0	0.5138	0	0	0.7193
1.0932	113.034	0	0	0	0	0	0	0	0	0	0	0	0	0	0	0	0	0	0	0	0	0	0	0	0	0.165	0	0.1437	0	0	0	0	0	0	0	0	0	0	0	0	0.2801	0	0	0	0	0	0	0	0
0.4595	113.024	0	0	0	0	0	0	0	0	0	0	0	0	0	0	0	0	0	0	0	0	0	0	0	0	0	0	0	0	0.0509	0	0	0	0	0	0	0	0.1225	0	0	0	0	0	0	0	0	0	0	0
1.5893	113.023	0	0	0	0	0	0	0	0	0	0	0	0	0	0.1729	0	0	0	0	0	0	0	0.1103	0.259	0	0.1748	0	0	0	0	0.3305	0	0	0	0	0.1248	0.1434	0.3595	0	0.1568	0	0	0	0	0	0	0	0	0
1.4385	981.294	0	0	0	0	0	0	0	0.1026	0.1468	0.1107	0.1596	0.178	0.2893	0.3228	0	0.1348	1.1818	0	2.6606	1.0716	0.4475	0.0971	0.5492	0.4905	0.3049	0.4887	0.0868	0.1296	0	0	0.3879	0	0	0	0.1201	0.3059	0.1743	0	0.5252	0.3795	1.1747	0	0	1.2155	0.3138	1.3788	0.3129	0.1207
0.4129	981.274	0	0	0	0	0	0	0	0	0	0	0	0	0	0	0	0	0	0	0	0	0	0	0	0	0	0	0	0	0	0	0	0	0	0	0	0.0431	0	0	0	0	0.2042	0	0	0	0	0	0	0
2.0526	981.071	0	0	0	0	0	0	0	0	0.1462	0	0	0	0.1434	0.2843	0	0.3622	0.2486	0	0	0	0	0	0	0.0473	0.4668	0	0	0.0621	0	0.1914	0.2034	0	0	0.0794	0	0.0653	0	0	0.1962	0.0673	0	0.292	0.1983	0	0.2986	0.2071	0.2343	0
3.0891	980.521	0.3179	0	0	0	0	0	0	0	0.1701	0	0	0.0763	0.0289	0	0.0663	0	0	0	0	0	0	0	0.0543	0	0.0261	0.0154	0	0	0	0	0.069	0	0	0	0	0	0.0107	0	0	0	0	0	0	0	0	0.0795	0.1976	0
0.4078	980.274	0	0	0	0	0	0	0	0	0	0	0	0	0	0	0	0.0586	0	0	0	0	0	0	0	0.1535	0	0	0	0	0	0	0	0	0	0	0	0.1449	0	0	0	0	0.2734	0	0	0	0	0	0	0
0.437	980.164	0	0	0	0	0	0	0	0	0	0	0	0	0	0	0	0	0	0	0	0	0	0	0	0	0	0	0	0	0	0	0	0	0	0	0	0	0	0.067	0.2417	0	0	0	0	0	0	0	0	0
2.0586	980.074	0	0	0	0	0	0	0	0.3025	0.4002	0.4324	0.252	0.3947	0.3995	0.3412	0.521	0.4963	0.4585	0.4709	0.4698	0.2704	0.4933	0.2786	0.3814	0	0.5875	0.3646	0.4133	0.178	0.053	0.2275	0.1796	0.2296	0.3901	0.3259	0.2844	0.1926	0.5025	0.4092	0.1827	0.0509	0.744	0.4855	0.3401	0.5327	0.4708	0.146	0.2661	0.5356
3.0824	979.529	0	0	0	0	0	0	0	0.0505	0	0.0842	0	0	0.1351	0.1154	0	0	0.0454	0	0	0	0	0.1365	0	0.0757	0.0372	0.0319	0.0657	0.0505	0	0	0	0	0	0	0.0073	0	0.0874	0	0	0	0	0	0.0592	0	0.1015	0.0622	0	0
2.0613	979.077	0	0	0	0	0	0	0	0	0	0	0	0.2449	0	0	0	0.179	0.2232	0.304	0.1465	0.1262	0.346	0	0.0405	0	0	0.1963	0	0.1075	0	0.0736	0.1199	0.1503	0	0	0	0.1366	0.2627	0.4405	0.0771	0	0.4861	0	0	0.4659	0	0	0	0.3184
0.5045	978.647	0	0	0	0	0	0	0	0	0	0	0	0	0	0	0	0	0.0699	0	0	0	0	0	0	0	0	0	0	0.0477	0	0	0	0	0	0	0	0	0	0	0	0	0	0	0	0	0	0	0	0
2.06	978.078	0	0	0	0	0	0	0	0.1687	0.1825	0.1845	0	0.2698	0.1833	0.1963	0.2159	0.2604	0.2257	0.2323	0.3709	0.2094	0.2601	0.1532	0.2461	0	0.3294	0.2821	0.0654	0.085	0	0.0994	0.0973	0.1454	0.1881	0.5045	0.1805	0.0873	0.341	0.2292	0.1269	0	0.1888	0.248	0.1644	0.294	0.2478	0	0	0.3005
1.6246	977.358	0	0	0	0	0	0	0	0	0	0	0	0	0	0	0	0	0	0	0	0	0	0	0.1202	0.0978	0	0	0	0	0	0	0.0656	0	0	0	0	0	0	0	0	0	0	0	0	0	0	0	0	0
2.0745	977.08	0	0	0	0	0	0	0	0	0	0	0	0	0	0.114	0.0895	0	0.1414	0.0969	0	0.0743	0	0	0.0729	0	0.1167	0.1066	0	0	0	0	0	0	0	0.153	0.0546	0	0	0.1475	0	0	0.1277	0	0	0	0.1561	0	0	0
0.5322	976.219	0	0	0	0	0	0	0	0	0	0	0	0	0	0	0	0	0	0	0	0	0	0	0.0583	0	0	0	0	0.0397	0	0	0.0298	0	0.0601	0	0	0	0	0	0	0	0	0	0	0	0	0	0	0
0.5443	976.165	0	0	0	0	0	0	0	0.1853	0.0957	0.1383	0.0801	0.113	0.1767	0.1104	0.1528	0.257	0.1432	0.1368	0	0.1795	0.1212	0	0	0	0.0855	0	0.0789	0.213	0.0909	0.1956	0.2272	0.1928	0.1914	0	0.1935	0.2138	0	0.1191	0	0.2732	0.1144	0.1945	0.4663	0	0.0861	0	0.1241	0
1.068	975.319	0	0	0	0	0	0	0	0	0	0	0	0	0	0	0	0	0.0597	0	0	0	0	0	0	0	0	0	0	0	0	0	0	0	0	0	0	0	0	0	0	0.0441	0	0	0	0	0	0	0	0
1.3711	416.315	0	0	0	0	0	0	0	0.2015	0	0	0	0	0	0	0.2043	0.1214	0	0.3206	0	0.3502	0	0.1985	0	0	0	0	0	0.0948	0	0	0.1345	0.2045	0.2523	0.1815	0	0	0.4218	0	0.1217	0	0	0	0	0	0.2079	0	0.294	0
2.3262	416.3	0	0	0	0	0	0	0	0	0	0	0	0	0	0	0	0.2663	0	0	0.6624	0.1846	0	0	0.6319	0	0	0.3042	0	0.1061	0	0.1691	0	0	0.1176	0	0	0	0	0.3335	0	0	0	0	0	0	0	0	0	0
0.5191	416.284	0	0	0	0	0	0	0	0.2032	0.1757	0.1674	0.1999	0.1582	0.1501	0	0	0	0	0	0	0.0846	0	0	0	0	0	0.0726	0	0	0	0	0	0	0	0	0	0	0	0	0	0	0.4102	0.2209	0.2939	0.4958	0.1814	0.4418	0.8173	0.7245
0.8945	416.252	0	0	0	0	0	0	0	0	0	0	0	0	0	0	0	0	0	0	0	0	0	0	0	0	0	0	0	0	0	0	0.0525	0	0	0	0	0	0.0928	0.0882	0	0	0	0	0	0	0	0	0	0
1.7225	416.252	0	0	0	0	0	0	0	0	0	0	0	0	0	0	0	0	0.2046	0	0.2969	0.2349	0	0	0.1538	0	0.1676	0.2263	0	0.1148	0	0	0	0	0	0	0.0954	0	0	0	0	0	0	0	0	0	0	0	0	0
1.2844	416.232	0	0	0	0	0	0	0	0	0	0	0	0	0	0	0	0	0	0	0	0	0	0	0	0	0.0709	0	0	0	0	0	0	0.1649	0	0	0	0	0	0	0	0	0	0	0	0	0	0	0	0
0.9243	416.205	0	0	0	0	0	0	0	0	0.1556	0	0.1513	0.1664	0.2105	0.2642	0.3065	0.1978	0	0.3124	0.2887	0.1899	0.3506	0.3102	0.4278	0.3704	0.3934	1.0453	0.7824	0.2588	0	0.4319	0.3826	0.2488	0.3571	0.2987	0.3282	0	0.781	0.1363	0.3721	0	0.343	0	0	0	0	0	0	0
2.2663	416.191	0	0	0	0	0	0	0	0	0	0	0	0	0	0	0	0	0	0	0	0	0	0	0	0	0	0.7037	0	0	0	0	0	0	0	0	0	0.1338	0	0	0	0	0	0	0	0	0	0	0	0
1.4499	416.154	0	0	0	0	0	0	0	0	0	0	0	0	0	0	0.0787	0	0.0773	0	0.1129	0.0751	0	0	0	0	0	0	0	0.0816	0	0.1856	0	0	0	0	0	0	0	0	0	0	0	0	0	0	0	0	0	0
1.5212	415.349	0	0	0	0	0	0	0	0	0	0	0	0	0	0.2838	0	0	0	0	0	0	0	0	0	0	0	0.2385	0	0.0549	0	0.1196	0	0	0	0.2181	0	0	0.3039	0	0	0	0.2617	0	0	0	0	0	0	0
0.6145	415.254	0	0	0	0	0	0	0	13.2585	12.104	11.2584	12.58	11.3435	12.1595	8.1402	4.5756	8.1069	9.5736	78.7596	6.1216	5.8623	5.0413	29.872	26.4087	27.2089	14.4548	14.7043	96.3757	6.7324	19.1491	20.3775	14.5803	4.5876	17.9058	12.379	5.6905	5.6662	15.0865	3.449	26.5287	12.2942	1.6396	1.7937	1.6761	3.2973	32.8481	2.4676	2.7891	2.8028
0.9221	415.227	0	0	0	0	0	0	0	0	0	0	0	0	0	0	0	0	0.1668	0	0	0	0	0.1692	0	0	0	0	0	0	0	0	0	0	0	0	0	0	0	0	0	0	0	0	0	0	0	0	0	0
0.4534	415.211	0	0	0	0	0	0	0	1.4558	1.3607	1.3087	1.454	1.3677	1.3243	2.1843	0.8233	1.4921	0.8693	1.2018	1.3694	0.9085	1.2565	1.4528	0.8765	0.6984	1.2725	1.6587	0.9242	0.9084	0.8419	0.8414	0.7729	0.8947	1.1193	1.4451	0.8488	0.8677	2.0712	1.4079	1.5757	0.8485	2.1149	1.8523	2.4922	2.5782	1.5789	1.2708	2.301	1.9354
0.8853	415.186	0	0	0	0	0	0	0	0	0	0	0	0	0	0	0	0	0	0	0.4772	0	0	0	0	0	0	0	0	0	0	0	0	0	0.1559	0	0	0.3098	0	0	0	0	0	0	0	0	0	0	0	0
1.2299	415.14	0	0	0	0	0	0	0	0	0	0	0	0	0	0	0	0	0	0	0	0	0	0	0	0	0	0	0	0	0.6623	0	0	0	0	0	0	0	0	0	0	0.0503	0	0	0	0	0	0	0	0
1.7574	415.139	0	0	0	0	0	0	0	2.7034	2.8295	2.6121	2.9211	2.5915	2.6499	0	0	0	0	0	0	0	6.5696	0	0	27.6173	0	0	5.5935	0	48.9275	0	0	0	0	0	0	19.831	0	4.377	0	17.5917	0	0	0	0	0	0	0	0.3559
0.5399	260.06	0	0	0	0	0	0	0	0.1685	0.1989	0.206	0.2303	0.1524	0.2531	0	0.1593	0	0.2492	0	0.1531	0.3489	0.392	0.2928	0.5355	0.7417	0.1012	1.6577	0.1338	0.1003	0	0.1426	0.4765	0	0	0.2057	0	0	0.2827	0.4037	0.1557	0.111	0	0	0	0.1864	0.128	0	0	0.2863
3.1172	259.958	0	0	0	0	0	0	0	0.0401	0	0	0	0	0	0	0.693	0	0.18	0.4246	0	0	0.2821	0.0156	0	0	0	0	0.1235	0.0014	0	0	0	0.0042	0	0.2705	0.2325	0.0033	0	0	0.0195	0	0.5899	0	0	0	0	0	0.0474	0
0.4472	259.19	0	0	0	0	0	0	0	0	0	0	0	0	0	0	0	0	0	0.3105	0.4646	0.2356	0.3394	0.4189	0	0.3066	0.4501	0.4147	0.3204	0.1797	0	0.2672	0.2218	0.2132	0.3185	0	0.2085	0.1265	0	0.2366	0	0.1148	0	0.3715	0	0	0.2696	0.5595	0.3502	0.3713
1.7149	259.164	0	0	0	0	0	0	0	0	0	0	0	0	0	0	0.933	0.9391	0.778	0.622	1.6025	0	0	1.9108	1.6434	1.166	0	0	0.6787	1.112	0.8434	0.9555	0	2.7041	0.9384	0	1.2462	1.2123	0	1.9489	2.005	0.9794	0	0.9799	0	0	0	0	0	0
2.6644	259.131	9.0547	0	0	0	0	0	0	0	0	0	0.0041	0	0	0.0684	0	0	0	0	0	0.0227	0	0.0814	0	0.1952	0.0364	0.0495	0	0.1004	0.1908	0	0	0	0	0	0	0	0	0.1129	0	0	0.0033	0	0.0035	0.0483	0	0	0	0
0.4666	259.128	0	0	0	0	0	0	0	0	0	0.0746	0	0	0	0.3433	0.5363	0.6201	0.082	0.1724	0	0	0	0	0	0.1903	0.1301	0	0.5188	0.1717	0.2146	0.9911	0	0	0.1221	0.7135	0.1148	0.1074	0	0	0.1757	0	0.9221	0.76	0	0	0	0	0	0
1.1803	259.121	0	0	0	0	0	0	0	0	0	0	0	0	0	0	0	0	0.2165	0	0	0.2404	0	0	0	0	0	0	0	0.2343	0.2444	0	0.3243	0	0	0	0	0	0	0	0	0	1.0154	0	0	0	0	0	0	0
0.8374	259.115	0	0	0	0	0	0	0	1.955	1.8957	0.8904	1.7817	1.684	1.3744	0	1.256	5.3527	2.8207	1.9584	2.3261	2.5199	2.5038	4.0575	2.0078	2.0952	1.1476	2.6019	2.3541	2.5682	2.6743	1.575	1.2155	1.2784	2.0951	0	1.7086	1.308	4.4869	1.7459	3.2375	2.7303	0	0	2.3206	2.1392	2.239	1.5984	1.1063	1.7039
1.6362	259.104	0	0	0	0	0	0	0	0	0.3189	0.2664	0.3337	0.2764	0.2562	0	0	0	0.202	0	0	0	0.3588	0	0	0.3291	0	0	0.5135	0.2981	0.273	0	0	0	0	0	0	0.385	0	0.304	0	0.1984	0	0	0	0	0	0	0	0
0.5824	259.094	0	0	0	0	0	0	0	0	0	0	0	0	0	0	0	0	0.1574	0	0	0	0	0	0	0.0784	0	0.4053	0	0	0	0.1321	0	0	0	0.416	0.1401	0	0.3975	0	0	0	0	0	0	0	0	0	0	0
0.9362	259.044	0	0	0	0	0	0	0	0	0	0	0	0	0	0.5182	0.3379	0.2866	0	0	0.5117	0	0	0.3637	0.3619	0	0.3645	0	0	0.1997	0	0	0.2246	0.293	0	0	0	0.1615	0	0.2758	0	0.1629	0	0	0	0	0	0	0	0
3.0317	258.918	0	0	0	0	0	0	0	0.143	0.147	0	0	0	0	0.2197	0	0	0	0	0	0.3895	0	0	0.1556	0.169	0	0	0	0.3138	0.283	0.1339	0.1351	0.2823	0.3993	0.1422	0	0	0	0.1468	0	0	0.146	0.0539	0	0.0238	0	0	0	0
2.335	258.17	0	0	0	0	0	0	0	1.9504	2.0416	1.8984	2.0332	2.0587	2.2466	2.5675	3.7443	2.3507	0.1917	0.0193	0	1.5908	1.4784	3.107	0	1.5765	3.0565	0	1.6458	1.9126	1.9533	1.0788	1.8854	3.3716	1.655	5.854	0	2.0368	3.2385	1.9851	0	0.3937	2.3491	2.0732	1.6174	0	1.7669	0	1.472	1.5245
0.5776	258.113	0	0	0	0	0	0	0	0	0	0	0	0	0	0	0.2278	0	0	0	0	0	0	0	0	0	0	0	0	0	0	0.4007	0	0	0	0	0	0	0	0	0	0	0	0	0	0	0	0	0	0
1.2983	258.108	0	0	0	0	0	0	0	1.0352	0.9173	0.8814	0.885	0.7676	1.0217	1.5007	0.8456	0.4845	1.0123	0.9067	1.72	1.1223	0	1.094	0.8779	0.5566	1.3962	1.578	0.8385	1.5069	1.7205	1.0634	0.4214	1.2031	0.8604	1.3173	0.9566	1.0488	1.7975	1.6357	1.0742	0	1.1286	0	0.2923	1.012	0.8979	1.3349	0.7977	0
1.3454	257.168	0	0	0	0	0	0	0	0	0	0	0	0	0	0	0	0	0	0	0	0	0.6101	0	0	0.5479	0.3836	0.2905	0.0859	0.3192	0	0	0.228	0.4936	0	0	0.2309	0.086	0	0	0	0	0	0	0	0	0	0	0	0
1.1099	116.108	0	0	0	0	0	0	0	12.7748	12.7006	12.1548	13.3783	12.5688	12.8874	19.3226	8.5797	17.5126	6.6901	16.6854	19.0579	27.1652	14.0466	12.3812	14.2914	32.6584	18.2954	36.8178	11.3072	7.7233	7.9719	15.4722	14.2944	8.9764	16.5259	24.9546	25.3917	3.4753	22.7952	11.2581	12.5716	10.1467	20.1746	5.1403	9.7834	5.5056	16.8209	17.3718	12.8618	17.4978
0.8738	116.107	0	0	0	0	0	0	0	0	0	0	0	0.1316	0	0	0	0	0	0	0	0	0	0	0	2.9265	0	0	0	0	0	0	0	0	0	0	0	0	0	0	0	0	0	0	0	0	0	0	0	0
0.8023	116.071	0	0	0	0	0	0	0	0.9096	0.8538	0.7598	0.9041	0.8245	0.8251	0.2847	0.4776	2.3054	1.8653	0	2.6587	0.3471	0.4942	0.6355	1.0762	0	0.8972	3.2003	2.0248	1.2463	0.4716	0.0751	0.4609	1.0051	0.3157	0.8908	0.5703	1.3226	0.5309	0.4278	0.5124	0.7816	0.7157	0.3389	0.9703	0.8787	0.4843	1.9918	0.3191	0.634
0.486	116.05	0	0	0	0	0	0	0	0.2407	0.2846	0.2492	0.275	0.3342	0.2004	0.3255	0.4148	0.2358	0.2195	0.185	0.2859	0.4744	0.2239	0.3978	0.2586	0.3673	0.2585	0.4664	0.2886	0.1936	0.2371	0.2813	0.1658	0.2747	0.2675	0.5904	0.1614	0.1815	0.4381	0.2554	0.3806	0.1826	0.281	0.2524	0.1593	0.3087	0.204	0.2819	0.3788	0.2573
2.3414	116.016	0	0	0	0	0	0	0	0	0	0	0	0	0	0	0	0	0	0	0	0	0.1598	0	0	0	0	0	0	0.1762	0.1102	0	0.1366	0.1333	0	0	0.1476	0.1651	0	0	0	0.1145	0	0	0	0	0	0	0	0
2.9908	115.075	0	0	4.9726	0	0	0	0.0091	0	0	0.6987	0.4467	0.4947	0	0	0	0	0	0	0	0	0	0	0	0	0	0	0	0	0	0	0	0	0	0	0	0.8997	0	0	0	0	0	0	0	0.4241	0	0.4979	0	0
0.457	115.056	0	0	0	0	0	0	0	0.3123	0.226	0.3147	0.2737	0.2075	0.2328	0.454	0.7699	0.2421	0.3998	0.3942	0.1298	0.7844	0	0.8291	0.5677	0.0614	0.102	0.6592	0	0.3859	0.1834	0.3286	0.3367	0.5685	0.2587	2.1436	1.0567	0.391	0.2186	0.2756	0.3542	0.2411	1.0161	0.628	0	0	0.6707	0	0.5017	0
1.0507	115.055	0	0	0	0	0	0	0	0.3674	0	0	0	0	0	0	0	0	0	0	0	0.2138	0	0	0	0	0	0	0	0	0	0	0	0	0	0	0	0.2164	0.2864	0	0	0.1767	0.5904	0.4583	0	0	0	0.4725	0	0
3.2772	115.04	0	0.0645	0	0	0	0	0	0.7586	0.6454	0.5041	0.5821	0	0	0	0.5218	0.1953	0.5053	0.3497	0.9041	0	0.2434	0	0.474	0.4719	0.9217	0	2.0689	0.3613	0.2086	0	0.3481	0.2708	0	0.6431	0	0	3.4372	0.5177	0.2248	0	0.4405	0.2907	0.6708	0	0.4036	0	0	0
0.7046	115.047	0	0	0	0	0	0	0	0	0	0	0	0	0	0	0	0	0	0.3332	0	0	0	0	0	0.4527	0	0.3905	0	1.6798	0.519	0	0	0	0.6149	0	0	0	0.5027	0.2375	0	0	0	0	0	0	0	0	0	0
3.0912	114.893	0	0	0	0	0	0	0	0	0	0	0.1442	0.3173	0	0	0.2179	0	0.1694	0.3517	0.5186	0.0063	0.0052	0.3145	0	0	0.3389	0	0.2481	0	0.0212	0	0.2245	0.2719	0.2366	0	0.113	0.0295	0.1992	0	0.3132	0.1727	0	0	0.1706	0.6267	0	0	0	0.2076
0.7723	114.126	0	0	0	0	0	0	0	0	0	0	0	0	0	0	0	0	0	0	0	0	0	0	0	0	0	0	0	0.388	0	0.1056	0	0	0	0	0	0.1903	0	0	0.1832	0.1191	0	0	0	0	0	0	0	0
0.6168	114.091	0	0	0	0	0	0	0	0.8642	0.9469	1.1365	0.9875	1.0457	1.1392	1.0532	2.4275	1.6506	1.7467	1.5841	1.7051	2.0213	1.1092	1.163	1.2005	0.503	1.5608	3.0649	0.5928	0.4324	0.6845	0.4846	0.8348	0.5779	0.5346	1.2245	0.6471	0	1.7842	1.7765	1.258	0.3188	1.41	1.0722	0.9986	2.0278	0.7639	2.0327	1.67	1.5217
2.1636	114.067	0	0	0	0	0	0	0	0	4.0705	0	3.7308	3.5131	3.5272	5.4742	8.0424	5.9688	3.5108	1.6827	7.6908	0	3.488	0	4.856	4.8743	0	6.7263	7.0354	1.148	0	5.9025	0	0	2.8306	6.8851	6.1419	0.9766	12.2732	6.4	5.0574	3.8659	0	0.0936	3.2224	3.862	0.7882	1.1833	0.4838	2.5944
1.3182	114.067	0	48.2721	0	0	0	0	0	339.91	329.557	317.841	338.179	323.214	320.267	386.144	255.408	279.711	240.741	232.021	374.055	230.731	194.635	321.197	252.776	190.183	331.118	345.228	265.593	177.06	202.239	247.798	196.001	244.923	236.365	348.607	231.532	199.77	450.459	330.601	287.151	159.017	355.195	293.243	379.789	446.619	325.545	465.157	331.663	303.702
1.6769	114.067	0	0	0	0	0	0	0	0	1.0913	0.8925	0	0	0	0	0	14.3751	0	0	0	0	0	0	0	0	0	0	1.3866	0	0	0	0	0.8927	0	0	7.3741	1.2219	0	0	0	1.233	2.6716	0.0963	0	0	0	0	0	0
0.6676	992.706	0	0	0	0	0	0	0	0	0	0	0	0	0	0	0	0	0	0	0	0	0	0	0	0	0	0	0	0	0	0	0	0	0	0	0	0	0	0	0	0	0	0.5677	0	0.8109	0	0	0.4407	0
0.4241	992.705	0	0	0	0	0	0	0	0	0	0	0.2272	0	0	0	0	0	0	0	0	0	0	0	0.1412	0	0	0	0	0	0	0	0	0	0	0	0.0615	0	0	0.2851	0.1548	0	0.4645	0.3022	0.5263	0.4966	0	0.6349	0.3184	0
1.6201	991.376	0	0	0	0	0	0	0	0	0	0	0	0	0	0	0	0	0	0	0	0	0	0	0	0.1165	0	0	0	0	0	0	0.0464	0	0	0	0	0	0	0	0	0.0633	0	0	0	0	0	0	0	0
0.6723	991.327	0	0	0	0	0	0	0	0	0	0	0	0	0	0	0	0	0	0	0.3909	0.0434	0	0	0	0.0413	0	0	0	0	0	0	0	0	0	0	0	0	0	0	0	0	0.1206	0	0	0	0	0	0	0
0.4304	990.722	0	0	0	0	0	0	0	0	0	0	0	0	0	0	0	0	0.0509	0	0	0	0	0	0	0	0	0.0589	0	0	0	0	0	0	0	0	0	0	0	0	0	0	0	0	0	0	0	0	0	0
3.0888	990.522	0	0	0	0	0	0.0697	0	0	0	0	0	0.1454	0	0	0.0865	0.1875	0	0.122	0.1118	0.0873	0.1017	0	0	0.0701	0	0	0	0	0.0603	0.1901	0	0.184	0	0	0	0.0503	0	0.1795	0	0.0418	0.2637	0	0.097	0.2315	0	0.0355	0.2322	0.2094
3.0925	989.522	0	0	0	1.361	0.2907	0.4313	0	0.2235	0.3476	0.163	0.2371	0	0.1544	0	0.1078	0.1449	0	0.2108	0.2529	0.2168	0.0287	0.1996	0	0.1355	0.237	0.4624	0.1065	0.1054	0.0626	0	0.1144	0.0343	0.1869	0.0965	0	0.1897	0.1373	0.3235	0.1244	0.107	0.1129	0	0.2127	0.2174	0.2836	0	0.2918	0.2504
0.8754	988.676	0	0	0	0	0	0	0	0	0	0	0	0	0	0	0	0	0	0	0	0	0	0	0	0.118	0	0	0	0	0	0	0	0	0	0	0	0	0	0	0	0	0	0	0	0	0	0	0	0
3.0892	988.524	0	0	0	0	0.0322	0	0	0.2592	0.2979	0.3255	0	0.2927	0.2949	0.2818	0.2897	0.2221	0.1021	0.2881	0.4029	0.2991	0.244	0.2679	0.2543	0.1716	0	0.1576	0.146	0.0632	0.1448	0.2542	0.1703	0.2888	0.1817	0	0.2747	0.2442	0	0.2454	0.2774	0.1271	0.3704	0	0.0727	0.2728	0.1779	0.1368	0.2842	0.1116
3.0888	987.526	1.3354	0	0	0	0.7354	0.1341	0	0.1152	0	0	0.1522	0.0614	0.107	0.1747	0.1451	0.1639	0.0604	0.1006	0.1737	0.1336	0	0.1333	0.1164	0.072	0.1347	0.0757	0.0459	0.0296	0.0899	0.1337	0.054	0.0404	0.1253	0.1073	0	0.0405	0	0.1487	0.1416	0.0716	0.1402	0.2236	0	0.2741	0.143	0	0.1456	0.1543
0.4395	987.172	0	0	0	0	0	0	0	0	0	0	0	0	0	0	0	0.0829	0.0619	0	0	0	0.2008	0	0	0	0	0	0	0.0559	0	0	0	0	0	0	0	0.0626	0	0.4528	0.8321	0	0	0	0.2589	0	0	0	0	0
1.7762	985.326	0	0	0	0	0	0	0	0.1236	0.1751	0.182	0.1686	0.1446	0.1019	0.2995	0	0.26	1.6779	0	3.1604	1.3714	0.4634	0.1021	1.2492	0.5008	0.2655	0.1931	0.1299	0.3666	0	0	0.5394	0	0	0	0.1337	0.1683	0	0	0.7268	0.2573	1.4365	0	0	1.2109	0.3586	0.8748	0.4753	0
0.5483	984.679	0	0	0	0	0	0	0	0	0	0	0	0	0	0	0	0	0	0	0	0	0	0	0	0	0	0	0	0.0513	0	0	0	0	0	0	0	0	0	0	0	0.0394	0	0	0	0	0	0	0	0
3.0964	982.516	0	0	0	0	0	0	0.173	0	0.0724	0.031	0.0388	0.1723	0	0	0.0453	0	0.087	0	0	0	0.128	0	0	0	0	0.1601	0.0115	0	0	0.0055	0	0	0	0	0	0	0	0	0	0	0	0.0387	0	0	0	0	0	0
2.054	982.071	0	0	0	0	0	0	0	0	0	0	0.4557	0.2961	0	0	0	0	0	0	0.2516	0	0	0	0	0	0.5971	0	0.2753	0	0	0	0	0.095	0	0	0	0.0752	0	0	0.2806	0	0	0	0.0843	0	0	0	0.1783	0
3.0842	981.516	0	0	0	0	0	0	0	0.2975	0.133	0.2191	0	0.1354	0.1319	0.1428	0.1483	0.1688	0	0.2217	0.1834	0.114	0.0244	0.2196	0.089	0.0951	0.1067	0.0831	0	0	0.0954	0.1459	0.0483	0	0.1245	0.0789	0	0	0.1659	0.0662	0.2112	0.0918	0.1032	0.2266	0.2314	0.2543	0.1667	0.1518	0.177	0
2.213	422.182	0	0	0	0	0	0	0	0	0	0	0	0	0	0	0	0	0	0	0	0	0	0	0	0	0	0	0	0.0544	0.0926	0	0	0.122	0	0	0	0.1232	0	0	0.2326	0.1229	0	0	0	0	0	0	0	0
1.8835	421.289	0	0	0	0	0	0	0	0	0.1897	0	0.3856	0.2454	0.4461	0	0.1368	0	0	0	0.3292	0.1309	0.2914	0	0.2231	0.1435	0	0.1494	0.279	0.0997	0.1759	0.3881	0	0.2657	0.2624	0.1638	0.2869	0	0.3683	0	0.1827	0.2048	0.3597	0	0	0	0.3881	0.2574	0	0
0.9077	421.205	0	0	0	0	0	0	0	0	0	0	0	0	0.1136	0	0	0	0.2487	0	0	0.2661	0	0.48	0	0.1245	0	0.4112	0.0597	0.3665	0.1552	0.171	0.0648	0.2194	0.1457	0	0.1131	0.2541	0.1709	0.2793	0.1858	0	0	0	0	0	0	0	0	0
1.4486	421.109	0	0	0	0	0	0	0	0	0	0	0	0	0	0	0.0818	0	0.0841	0	0	0	0	0	0	0	0	0	0	0	0	0.2558	0	0	0	0	0	0.0366	0	0	0	0	0	0	0	0	0	0	0	0
0.4537	420.332	0	0	0	0	0	0	0	0.3107	0.1893	0.1269	0	0	0	0.2045	0	0.1196	0.1113	0.1698	0.7415	0.0681	0.1225	0.1372	0.0804	0.0705	0.111	0	0.1211	0	0.0536	0	0.191	0.1091	0.0901	0.1171	0.0546	0.2616	0	0.5353	0	0.0709	0	0.5948	0	0	0	0	0.7541	0
1.8791	420.258	0	0	0	0	0	0	0	0	0	0	0	0	0	0	0	0	0	0	0	0.1463	0	0	0.1609	0	0	0.1915	0	0	0	0	0	0	0	0	0	0	0	0	0	0.0959	0	0	0	0	0	0	0	0
0.4524	419.366	0	0	0	0	0	0	0	0	0	0	0	0	0	0	0	0	0	0	0	0	0	0	0	0	0	0	0	0.1079	0	0	0	0	0	0	0	0	0	0	0	0	0	0	0	0	0	0	0	0
0.5758	419.238	0	0	0	0	0	0	0	0	0	0	0	0	0	0	0	0	0	0	0.4178	0	0	0.1431	0	0	0	0.1448	0.1796	0	0	0	0	0	0	0	0	0	0	0	0.2956	0	0	0	0	0	0	0	0	0
0.7476	418.263	0	0	0	0	0	0	0	0	0	0	0	0	0	0	0	0	0	0	0	0	0	0	0	0.2991	0	0	0	0	0	0	0	0	0	0	0	0	0	0	1.1451	0	0	0	0	0	0	0	0	0
1.3689	417.321	0	0	0	0	0	0	0	0	0	0	0	0	0	0	0	0	0	0	0	0	0	0	0	0	0	0	0.0827	0	0	0	0	0	0	0	0	0	0	0	0	0.0633	0	0	0	0	0	0	0	0
0.4413	417.321	0	0	0	0	0	0	0	0.3917	0.3231	0.1713	0	0	0	0.1889	0.1804	0.2199	0.1457	0.2181	0.3171	0	0	0.2304	0.2108	0.1421	0.1847	0	0	0	0	0	0	0	0	0	0	0	0.1509	0	0	0	0	0	0	0.1573	0	0	0	0
0.9365	417.21	0	0	0	0	0	0	0	0	0	0	0	0	0	0.2273	0	0	0	0	0.3321	0	0	0	0	0	0	0	0	0	0	0	0	0	0	0	0	0	0.1636	0	0	0	0	0	0	0	0	0	0	0
0.5454	417.142	0	0	0	0	0	0	0	0.9436	0.9238	0.8814	0.9803	0.8578	0.9417	1.0099	1.2642	1.7105	0.9841	0.9407	0	0.7503	0.9592	0	0	0.2898	0.8265	0	0.6574	1.2634	0.907	1.1092	1.1382	0.9524	0.9559	0	1.067	1.1636	0	0.5953	0	1.4936	0.6404	1.3171	2.6569	0	0.6832	0	1.1556	0.3667
2.125	417.106	0	0	0	0	0	0	0	0	0	0	0	0	0	0	0	0	0	0	0	0	0	0	0	0	0.161	0	0	0	0	0	0.1085	0.7813	0	0	0.1343	0	0	0.2095	0	0	0	0	0	0	0	0	0	0
1.0493	416.352	0	0	0	0	0	0	0	1.4539	1.3428	1.3062	1.4136	1.3423	1.3841	0	0.2435	2.2815	3.4981	0	0	0.2844	0	0.8491	0.2446	0	0.5362	0	9.631	4.271	0	9.563	3.1293	1.0277	3.5517	0	0	8.7138	0	0.1005	0	0	0	0	1.2971	3.524	0	0	0	0
0.9956	416.324	0	0	0	0	0	0	0	0.3144	0.3072	1.2401	0.2338	0.2726	1.3626	0.5156	0.1855	0	0.1007	0.2112	0.2065	1.3563	0	0.8375	0	0	1.7398	0	1.9228	0.6532	0	0	0.1376	0	0	1.0697	0.418	0.1628	0.1338	0	0.3103	0	0.7395	0	1.3177	0	0.1441	0.2834	0.7025	0
2.2883	260.18	0	0	0	0	0	0	0	0	0	0	0	0.3041	0	0	0	0	0	0	0	0	0	0	0	0.4458	0	0.6167	0	0.3078	0.2002	0	0	0	0	0	0	0.0179	0	0.2597	0	0.3368	0	0	0	0	0	0	0	0
2.4078	260.18	0	0	0	0	0	0	0	0	0	0	0	0	0	0	0	0	0	0	0	0	0	0	0	0.0319	0	0	0	0	0	0	0.1894	0	0	0	0	0	0	0	0	0	0	0	0	0	0	0	0	0
3.3581	260.149	0.3186	0	0	0	0	1.5025	0	0	0	0	0	0.016	0	0	0.1385	0.1738	0.1275	0	0.3074	0.0888	0.0409	0.3242	0.1574	0.2528	0	0.3089	0	0.1764	0.0931	0.3704	0.1014	0	0.2085	0.1349	0	0.0322	0	0.2264	0	0.1273	0	0	0	0	0	0	0	0
0.4542	260.132	0	0	0	0	0	0	0	0.1564	0.2177	0.1651	0	0.1132	0.1863	1.1485	0.2342	0.3044	0.1467	0.3723	0	0.8913	0	0	0.3332	0.0996	0	0	0.1475	0	0.1086	0.3992	0	0.1197	0	1.3615	0.3291	0	0	0	0.4915	0.2483	0.2246	0	0	0.2973	0.1647	0.2087	0	0
1.6825	260.147	0	0	0	0	0	0	0	0	0	0	0	0	0	0	0	0.1536	0	0	0	0	0	0.1867	0	0	0	0	0	0	0	0	0	0	0.1047	0	0	0	0	0	0	0	0	0	0	0	0.1678	0	0	0
0.7234	260.118	0	0	0	0	0	0	0	0	0.155	0	0.1326	0	0	0.1558	0.1273	0	0	0	0	0	0	0	0	0	0.1799	0	0	0	0.0674	0	0	0	0	0	0	0	0	0	0	0	0	0	0	0	0.0717	0	0	0
0.9101	260.115	0	0	0	0	0	0	0	0.1653	0	0.2083	0	0.1416	0	0	0	0	0	0	0	0	0	0	0	0	0	0	0.0984	0.1245	0	0.1818	0	0	0	0	0	0	0	0	0	0	0	0	0	0	0	0	0.2009	0
1.1515	260.113	0	0	0	0	0	0	0	0	0	0	0	0	0	0	0	0	0	0	0	0	0	0	0	0.1363	0	0.2128	0	0.1535	0	0	0.082	0.1143	0.1662	0	0	0	0.0981	0	0.1191	0	0	0	0	0	0	0	0	0
2.7133	260.092	0	0	0	1.529	0	0.0805	0	0.4368	0.3655	0	0.4765	0.4442	0	0	1.0308	0.6933	0.1673	1.5252	0.5726	0.6005	0	0.3604	0	0	1.7027	0	0.1573	0.2006	0	0.7748	0.3859	0.7637	0.8732	0.4478	0.3171	0	1.15	1.3324	0	0.0988	0.8011	0.2557	0.1693	0.021	1.3781	0.6217	0	0.0174
1.4992	260.077	0	0	0	0	0	0	0	0	0	0.1719	0.1391	0	0	0	0	0.1406	0.1216	0.1353	0	0.4949	0	0.1504	0	0	0	0	0.087	0	0	0	0	0.1574	0	0.3115	0.1243	0.1049	0	0.224	0	0	0.2588	0	0.3449	0	0.1769	0	0.4684	0.2733
2.3825	260.077	0	0	0	0	0	0	0	0.6768	0.5927	0.3883	0.3135	0.4503	0	0	0.8781	1.354	0.3906	0.7655	1.3428	0.408	0.1258	0	0.976	0	0	0.3124	0.4676	0	0	0.4303	0.0779	0.3791	0.2998	0	0.3267	0	0	0	0.7465	0	0.1801	0	0	0	0.5425	0.1551	0.4885	0
1.7055	260.06	0	0	0	0	0	0	0	0.2869	0.1214	0.2615	0.2891	0.2376	0.2311	0.4649	0	0.2332	0	0.1381	0	0.2561	0	0	0	0	0.1408	0.1638	0	0	0	0	0.3078	0	0	0.3888	0	0	0.4907	0	0	0	0.4052	0	0.228	0	0	0	0	0
0.8773	260.06	0	0	0	0	0	0	0	0.3339	0.2626	0.2955	0.3134	0.2671	0.2166	0.6314	0	0.1823	0.1389	0	0.1385	0.0774	0	0.4302	0	0	0	0	0	0	0	0.2572	0.1864	0	0.2256	0	0	0	0.7079	0	0	0	0.8833	0.9733	0.3459	0.6314	0.4857	1.4782	0.3704	0.7758
1.0592	260.059	0	0	0	0	0	0	0	2.4109	2.4211	2.2428	2.4404	2.2327	2.5501	3.9199	0.4156	0	0	0.9635	0.2707	0.1318	0	0.0958	0.7745	0	0.1838	0	0	0	0.4661	5.3838	3.3008	0.9157	0	0.406	0.146	0.0667	6.3603	0.4997	0	0	8.7216	7.7133	2.8299	4.7114	4.8234	12.7599	2.4204	8.0168
3.2362	260.053	0	0.8601	0	0.7561	0.4163	0	0	0	0	0	0	0.1924	0.2275	0	0	0	0	0	0	0	0	0	0	0	0	0	0	0	0	0	0	0.56	0	0	0.3076	0	0	0	0	0	0.2819	0	0.1614	0.1767	0.3676	0.2662	0	0.1636
3.0057	260.053	0	0	0.2914	0	0	0	0	0	0	0	0	0	0	0.0952	0.1218	0.1446	0.0679	0.0896	0.2065	0.1292	0.0626	0	0.0876	0.0766	0	0	0.0699	0.1581	0.0242	0	0	0.138	0.1603	0	0	0	0	0.1045	0	0	0	0	0	0	0	0	0	0
2.502	118.086	0	0	0	0	0	0	0	0	0	0	1.3643	0	1.3553	0	0	0	0	0.6484	0	0	0	0	0.8855	0	0	0	0.7936	0	0	0	0	0	0	0	2.5407	0	1.107	0	0	0	0	1.1688	5.1317	0	0.7499	0	0	0
2.3955	118.086	0	0	101.862	0	0	0	0	0	0	0	0	0	0	0	0	0	0	0	0	0	0	0	0	0	3.5956	0	0	0	0	0	0.8392	0	0	0	0	0	0	0	0	0	0	0	0	0	0	0	0	0
1.8681	118.086	0	0	0	0	0	31.4999	0	0	0	0	0	0	0	0	0	0	0	0	0	4.7593	0	5.0851	0	0	4.1945	0	0	0	0	0	0	0	0	0	6.5456	0	0	0	0	0	0	0	0	0	0	0	0	6.3233
3.1639	118.086	0	59.4639	133.483	6.7342	13.6509	0	0	0	0	0	2.6336	0	0	0	0	1.5077	0.9107	0	0	0	0	0	0	0	0	2.0808	0	0	0	0	1.2731	0	0	0	0	0	0	0	0	0	0	0	0	7.1439	0.2787	1.4316	0	0
0.8202	118.086	0	0	0	0	0	113.182	0	0.4729	0	0.8054	0	0.8212	8.5031	0	0	0	0	1.3971	0	0	0	10.1919	2.9719	2.7714	1.7212	1.8302	4.8127	0.7872	1.8069	0	1.4754	1.1149	2.0425	2.4114	0	2.125	3.042	0	0	0	6.6217	1.8375	0.2764	3.369	0	6.0697	1.5308	0
1.5747	118.083	0	0	0	28.1437	0	40.0986	0	0.9989	4.4438	4.3345	1.7323	0	6.8621	2.741	0	2.3793	0.5237	1.3234	2.481	6.3968	0	4.9067	2.5227	12.7442	5.2509	7.3247	2.5272	0	15.227	5.4184	0.4973	0	4.0749	2.5703	0	2.4848	0	0.193	4.6719	13.8525	3.9332	0	4.002	1.3576	6.7486	0.1234	1.0658	2.3431
0.416	118.081	43.2861	0	0	0	19.2969	0	25.5686	0	0	0	2.6153	0.7666	0	0	0.7913	1.2214	0.5926	0	2.3222	3.2683	2.1694	2.2678	2.2267	1.5681	3.4797	2.7781	1.2391	0	1.6618	0.8967	0.9256	1.9957	0.797	1.1985	0	1.0754	0.9215	1.0627	2.0724	1.4604	0	2.5434	0	0.9132	0	0	2.1539	0
1.3416	118.066	0	0	0	0	0	0	0	7.2749	7.2029	6.5292	7.2661	6.6454	6.4096	19.2468	6.5058	5.2899	4.1402	3.1852	3.8546	21.6156	5.1868	5.8076	10.2656	3.0624	2.4143	6.6687	1.9417	5.8112	1.8576	10.4592	4.1252	2.361	4.1625	6.9651	4.3306	5.6909	7.5355	2.2786	12.4644	3.664	10.5248	9.5799	4.9311	12.6814	4.4977	6.8413	11.9403	10.9328
1.7118	117.109	0	0	0	0	0	0	0	0	0	0	0	0	0	0	0	0.0977	0.0707	0	0	0	0	0	0	0	0	0	0	0	0	0	0	0	0	0	0	0	0	0	0	0	0	0	0	0	0	0	0	0
0.5535	117.075	0	0	0	0	0	0	0	0.4701	0.3826	0.3438	0.3903	0.4342	0.3662	0	0.8932	0.8734	0.3477	0.3415	0.1582	0.5689	0.3424	0.8398	0.3109	0.3316	0	0.6645	0	0.1149	0.5565	0.6547	0.3911	0.7115	0.1868	1.0355	0.0635	0.6979	0.4153	0.8465	0.6009	0.0573	0.227	0.3788	0	0.6838	0.616	0	0.6575	0.3555
2.8799	117.07	1.6798	0	0	0	0	0	0.3964	0	0	0.0293	0.0177	0	0	0	0	0	0	0	0	0	0	0	0.2484	0.0964	0	0	0	0.0965	0.2818	0	0.0874	0	0	0	0.369	0	0	0	0	0	0	0	0	0	0.3142	0.064	0.0674	0.0083
2.1102	117.065	0	0	0	0	0	0	0	0	0.471	0	0.402	0	0	0	0.2129	0	0.1814	0	0.5461	0.3741	0	0	0.3116	0.1074	0	0.3536	0	0	0.2691	0	0	0	0.2855	0.1928	0	0	0	0	0	0	0	0	0	0	0	0.3797	0.4693	0
1.0667	117.061	0	0	0	0	0	0	0	0.3616	0.3366	0.307	0.3773	0.3179	0.361	0	0	0.3574	0	0	0	0.2502	0	0	0	2.7647	0	0	0	0.0472	0	0.0787	0.0599	0	0	0	0.4934	2.7214	0.2081	0	0.1843	0	0	0	0	0	0.4802	0.5674	0	0
2.3084	117.056	0	0	0	0	0	0	0	0	0	0	0	0	0	0	0	0	0	0	0	0	0	0	0	0.2385	0	0	0	0	0	0	0	0	0	0	0.2486	0	0	0	0	0	0	0	0	0	0	0	0	0
1.6491	117.053	0	0	0	0	0	0	0	0	0	0	0	0	0	0.3609	0	0.1982	0	0	0	0	0	0	0.199	0	0	0	0	0.1543	0	0	0	0	0.1168	0.2205	0.3807	0.0881	0	0	0	0	0.4588	0	0	0.8514	0	0	0	0
2.6644	117.019	0	0	0	0	0	0	0	0	0	0	0.0965	0.0792	0	0.0066	0	0.0278	0	0	0	0.0475	0.0428	0	0	0.1508	0	0.1913	0.066	0.0843	0.0986	0.0295	0.1407	0.095	0.1067	0.0519	0.1667	0.1276	0.1038	0.1721	0.1366	0.06	0	0.0375	0.0417	0	0	0.1027	0	0.0321
0.5473	999.197	0	0	0	0	0	0	0	0.0967	0	0.132	0.1831	0.2108	0.2264	0.1836	0.4913	0.7346	0.2439	0.3016	0	0.2649	0.2846	0	0	0	0.1476	0	0.1102	0.5524	0.3431	0.3141	0.3946	0.3683	0.2001	0	0.3673	0.5367	0	0.1345	0	0.8481	0.087	0.3267	0.9646	0	0.1212	0	0.1446	0
2.069	999.073	0	0	0	0	0	0	0	0	0	0	0	0	0	0.2304	0	0.1339	0	0.0928	0	0.0923	0.2231	0.1335	0.1442	0	0.1663	0.1577	0	0	0	0	0.0678	0.0655	0.1622	0	0.1474	0.0832	0.4085	0.2175	0	0	0.1084	0	0.1693	0	0.1729	0	0	0
0.5442	998.866	0	0	0	0	0	0	0	0	0.1135	0	0	0	0	0	0	0	0	0	0	0	0	0	0	0	0	0	0	0	0.2905	0.2529	0.3755	0	0	0	0	0.3961	0	0	0	0.3415	0	0	0	0	0	0	0	0
3.089	998.526	0.8645	0	0	0	0	0	0	0	0.2112	0.216	0.1295	0.2516	0.2546	0.2088	0.0672	0.2316	0	0	0	0.1148	0.2129	0.2324	0.1568	0.1818	0.1573	0.2832	0.0875	0.0384	0.2231	0.0803	0.0981	0.2117	0.0712	0.2069	0.0881	0.0225	0	0	0.1569	0	0.1006	0.3363	0.1657	0.0368	0	0.0729	0.255	0
2.0697	998.408	0	0	0	0	0	0	0	0	0	0	0.1735	0	0.1166	0	0.1117	0.2005	0.1853	0.1742	0.2305	0	0.1113	0	0.0712	0	0.1783	0.1378	0.1074	0.0598	0	0.0813	0.0796	0.1076	0.189	0.3071	0.2152	0	0.1928	0.113	0.1042	0	0	0	0	0.3847	0.1684	0	0	0.3002
2.0625	997.743	0	0	0	0	0	0	0	0	0.1922	0	0	0	0	0.2117	0	0.2007	0.0934	0.1905	0	0	0	0	0	0	0	0	0	0.0832	0	0.1192	0.0801	0	0	0.0969	0.1818	0	0	0	0.084	0	0	0	0	0.353	0	0	0	0.2564
3.0913	997.527	0	0	0	0	1.233	0	0	0.2789	0.1405	0.1725	0.1256	0.2887	0.1789	0.1755	0.2292	0.2484	0.1683	0.225	0.3109	0.0533	0.154	0.1848	0.109	0.1224	0.247	0.2339	0.106	0.1275	0.1614	0.2198	0.0509	0.1151	0.2555	0.1295	0.0777	0.1053	0.1251	0.2423	0.1542	0.1375	0.144	0.3197	0.1809	0.3973	0	0.1203	0.3413	0.388
2.3582	997.51	0	0	0	0	0	0	0	0	0	0	0.1576	0	0	0	0	0	0	0	0	0	0	0	0	0	0	0	0	0	0	0	0	0	0	0	0	0	0	0	0	0	0	0	0.2189	0	0	0	0	0
1.4377	997.266	0	0	0	0	0	0	0	0	0	0	0	0	0	0	0	0	0.132	0	0.2669	0.1326	0	0	0	0	0	0	0	0	0	0	0	0	0	0	0	0	0	0	0	0	0.1012	0	0	0	0	0	0	0
2.0663	997.077	0	0	0	0	0	0	0	0.1328	0	0	0	0	0.161	0	0	0.1398	0.0166	0.0999	0.2981	0	0.0472	0.0852	0	0	0.1502	0	0.1279	0.0441	0	0	0	0	0.1352	0.2099	0.0986	0	0.2705	0.0297	0.0831	0	0.1508	0	0	0.2628	0	0	0	0.1383
3.0922	996.531	0	0	0	0	0	2.9881	0	0.1627	0.1542	0.1574	0	0.2127	0.1367	0.1791	0.1699	0.1503	0.0575	0.0985	0.0326	0	0	0.1725	0	0.1772	0.2207	0.2292	0.112	0.0401	0.0313	0.1431	0.0817	0.1729	0.2143	0	0.1341	0.0665	0.1224	0.1211	0.1317	0	0.2768	0.2021	0.0581	0	0.2428	0	0.237	0.2466
2.0698	996.412	0	0	0	0	0	0	0	0	0	0	0	0	0	0	0.1004	0	0	0.093	0.1571	0	0	0	0	0	0.0834	0.1361	0	0.0477	0	0	0	0	0.0625	0.1966	0	0	0	0.1415	0	0	0	0	0	0	0.1143	0	0	0.1947
[truncated: 8,166 more rows]
[truncated: 18 more columns]

## Sheet: HILIC no osmolality
Sample name		09112021 Proteos blanc 1	09112021 Proteos blanc 2	09112021 Proteos blanc 3	09112021 Proteos blanc 4	09112021 Proteos blanc 5	09112021 Proteos blanc 6	09112021 Proteos blanc 7	09112021 Proteos blanc 8	09112021 Proteos QC 1	09112021 Proteos QC 2	09112021 Proteos QC 3	09112021 Proteos QC 4	09112021 Proteos QC 5	09112021 Proteos QC 6	09112021 Proteos QC 7	09112021 Proteos QC 8	09112021 Proteos 3 U1	09112021 Proteos 4 U1	09112021 Proteos 5 U1	09112021 Proteos 6 U1	09112021 Proteos 7 U1	09112021 Proteos 8 U1	09112021 Proteos 9 U1	09112021 Proteos 10 U1	09112021 Proteos 11 U1	09112021 Proteos 12 U1	09112021 Proteos 13 U1	09112021 Proteos 14 U1	09112021 Proteos 15 U1	09112021 Proteos 16 U1	09112021 Proteos 17 U1	09112021 Proteos 18 U1	09112021 Proteos 19 U1	09112021 Proteos 20 U1	09112021 Proteos 21 U1	09112021 Proteos 22 U1	09112021 Proteos 23 U1	09112021 Proteos 24 U1	09112021 Proteos 25 U1	09112021 Proteos 26 U1	09112021 Proteos 27 U1	09112021 Proteos 28 U1	09112021 Proteos 29 U1	09112021 Proteos 3 U2	09112021 Proteos 4 U2	09112021 Proteos 5 U2	09112021 Proteos 6 U2	09112021 Proteos 7 U2
Injection order		1	3	16	28	37	49	61	70	2	4	15	27	36	48	60	69	5	6	7	8	9	10	11	12	13	14	17	18	19	20	21	22	23	24	25	26	29	30	31	32	33	34	35	38	39	40	41	42
Period		BL	BL	BL	BL	BL	BL	BL	BL	QC	QC	QC	QC	QC	QC	QC	QC	P1	P1	P1	P1	P1	P1	P1	P1	P1	P1	P1	P1	P1	P1	P1	P1	P1	P1	P1	P1	P1	P1	P1	P1	P1	P1	P1	P2	P2	P2	P2	P2
Protein		BL	BL	BL	BL	BL	BL	BL	BL	QC	QC	QC	QC	QC	QC	QC	QC	PF	PF	Z	WPI	Z	PF	WPI	Z	WPI	Z	PF	PF	WPI	Z	Z	PF	WPI	Z	WPI	PF	Z	WPI	PF	Z	WPI	PF	Z	PF	PF	Z	WPI	Z
Ret. Time	m/z	09112021 Proteos blanc 1	09112021 Proteos blanc 2	09112021 Proteos blanc 3	09112021 Proteos blanc 4	09112021 Proteos blanc 5	09112021 Proteos blanc 6	09112021 Proteos blanc 7	09112021 Proteos blanc 8	09112021 Proteos QC 1	09112021 Proteos QC 2	09112021 Proteos QC 3	09112021 Proteos QC 4	09112021 Proteos QC 5	09112021 Proteos QC 6	09112021 Proteos QC 7	09112021 Proteos QC 8	09112021 Proteos 3 U1	09112021 Proteos 4 U1	09112021 Proteos 5 U1	09112021 Proteos 6 U1	09112021 Proteos 7 U1	09112021 Proteos 8 U1	09112021 Proteos 9 U1	09112021 Proteos 10 U1	09112021 Proteos 11 U1	09112021 Proteos 12 U1	09112021 Proteos 13 U1	09112021 Proteos 14 U1	09112021 Proteos 15 U1	09112021 Proteos 16 U1	09112021 Proteos 17 U1	09112021 Proteos 18 U1	09112021 Proteos 19 U1	09112021 Proteos 20 U1	09112021 Proteos 21 U1	09112021 Proteos 22 U1	09112021 Proteos 23 U1	09112021 Proteos 24 U1	09112021 Proteos 25 U1	09112021 Proteos 26 U1	09112021 Proteos 27 U1	09112021 Proteos 28 U1	09112021 Proteos 29 U1	09112021 Proteos 3 U2	09112021 Proteos 4 U2	09112021 Proteos 5 U2	09112021 Proteos 6 U2	09112021 Proteos 7 U2
3.1479	50.6033	0	0	0	0	0	0.6044	0	0	0	0	0	0	0	0	0	0	0	0	0	0	0	0	0	0	0	0	0	0	0.059	0	0.0506	0.1438	0	0	0.0509	0	0.0377	0	0	0	0	0	0	0	0	0	0	0
3.1477	50.658	0	0	0	0	0	0	0	0	0	0	0	0	0	0	0	0	0	0	0	0	0	0	0	0	0	0	0	0	0	0	0	0.1318	0	0	0.1098	0	0	0	0	0	0	0	0	0	0	0	0	0
3.1292	50.7293	0	0	0.4232	0	0.426	0	0.1555	0.1079	0	0	0	0	0.0438	0.0651	0.0627	0.0899	0	0	0	0	0	0.1501	0	0	0	0	0	0	0.0829	0	0	0.0314	0.0385	0	0.1128	0.0723	0	0.1063	0	0	0	0.0296	0	0.0651	0.0532	0	0	0.032
3.1568	50.7782	0	0	0	0	0	0	0	0.502	0	0	0	0	0	0	0	0	0	0	0	0	0	0	0	0.0098	0	0	0	0	0	0	0	0.1169	0	0	0	0	0	0	0	0	0	0	0	0	0	0	0	0
3.1498	50.8436	0	0	0	0	0	0	0	0	0	0	0	0	0	0	0	0	0	0	0	0	0	0	0	0	0	0	0	0	0	0	0	0.125	0.0753	0	0.0495	0	0	0	0.0762	0	0	0	0.0042	0	0	0	0	0
0.547	50.8914	0	0	0	0	0	0	0	0	0	0	0	0	0	0	0	0	0	0	0	0	0	0	0	0	0	0	0	0	0	0	0	0.017	0	0	0	0	0	0	0	0	0	0	0.0474	0	0	0	0	0
3.1342	51.0127	0	0	0	0	0.0779	0.0079	0	0	0	0	0	0	0	0.0108	0.0488	0.0479	0	0	0	0	0	0	0	0	0	0	0	0	0	0	0	0	0	0	0.0754	0.0636	0	0	0.0426	0	0	0.0406	0.0132	0	0	0	0.012	0
2.0841	51.3773	0	0	0	0	0	0	0	0	0	0	0	0	0	0	0	0	0	0	0	0.1095	0.0926	0	0	0	0	0	0	0	0	0	0	0	0	0	0	0	0	0	0	0	0	0	0	0	0	0	0	0
3.1603	52.8144	0	0	0	0	0	0	0.1528	0	0	0	0	0	0	0	0	0	0	0	0	0	0	0	0	0	0	0	0	0	0	0	0	0	0	0	0	0	0	0	0.0931	0	0	0	0	0	0	0	0	0
3.1261	52.8768	0	0	0	0	0	0	0	0	0	0	0	0	0.0331	0	0	0.0519	0	0	0	0	0	0	0	0	0.104	0	0	0	0.1125	0	0	0	0.0906	0	0	0.0649	0	0	0	0	0.0364	0	0.0235	0	0	0.0274	0	0.0407
3.1313	52.9388	0	0	0	0	0	0	0	0	0	0	0	0	0.0598	0	0.0702	0	0	0	0	0	0.0681	0.1147	0	0	0	0	0	0	0.0383	0.0092	0	0.0671	0	0	0	0.0299	0	0	0	0	0	0	0.0307	0	0	0	0	0
3.1303	52.9829	0	0	0	0	0	0	0	0	0	0	0	0	0.0387	0.0495	0.0454	0.058	0	0	0.1274	0	0	0	0	0	0.1036	0	0.062	0	0	0	0	0.079	0.095	0.0621	0.1244	0	0	0.1263	0	0	0	0.0355	0.03	0	0	0	0	0
3.1446	53.0261	0	0	0	0	0	0	0	0	0	0	0	0	0	0	0	0	0	0	0	0	0	0.1621	0	0	0.0855	0	0	0	0	0	0	0.1619	0.1145	0	0.1197	0	0	0	0.0944	0	0	0	0	0	0	0	0	0
3.1256	53.0818	0	0	0.1018	0	0	0	0	0	0	0	0	0.0589	0	0.0748	0.0276	0	0	0	0.0747	0	0	0	0	0	0.0652	0	0.0611	0	0.0794	0	0	0	0.1123	0.0522	0	0.0892	0.0385	0	0.0967	0	0.0597	0.0399	0	0	0	0	0	0.0221
3.1336	53.1572	0	0.2349	0	0	0	0	0	0	0	0	0	0	0	0	0	0	0	0	0	0	0	0.1258	0	0	0.0888	0	0	0	0.0779	0	0.0562	0.0574	0.0823	0	0.15	0.0818	0	0.1317	0.0931	0.0257	0	0	0	0	0	0	0	0.0781
0.9364	240.12	0	0	0	0	0	0	0	0	0	0	0	0	0	0	0	0	0	0	0	0	0	0	0	0	0	0	0	0	0	0	0	0	0	0	0	0	0.7621	0	0	0	0	0	0	0.9898	0	0.3212	0	0
1.6626	240.122	0	0	0	0	0	0	0	0	0	0	0	0	0.2783	0	0	0.3449	0.0904	0.4373	0	0.1545	0	0	0	0.7586	0.1609	0.2713	0	0	0.1495	0	0.5802	0	0.6807	0	0.3134	0.3332	0	0	0	0	0	0	0	0	0	0	0	0
1.4164	240.123	0	0	0	0	0	0	0	0	0	0	0	0	0	0	0	0	0	0.1533	0	0	0	0	0	0	0	0	0	0	0	0	0.0576	0	0	0	0	0	0	0	0	0	0	0	0	0	0	0	0	0
1.2675	240.196	0	0	0	0	0	0	0	0	0	0	0	0	0	0	0	0	0	0	0	0.5608	0	0	0	0	0	0	0	0	0	0	0	0	0	0	0	0.2349	0	0	0	0	0	0	0.2698	0	0	0	0	0
0.5572	240.231	0	0	0	0	49.1696	0	0	69.9738	1.1696	0.7062	0.7513	1.0442	0.629	0.6374	0.9171	0	0.7132	1.3545	0.955	0.9336	0.7365	1.0627	1.4762	1.508	0.8382	0.5733	0.3459	0.4962	0.9236	1.2446	0.2348	0.2275	0.1132	0.3243	0.8214	0.5221	1.5181	0.6911	0.4312	0.8531	1.4025	0.7712	0	1.6117	2.7028	1.1677	2.5219	1.0114
2.5296	240.231	0	0	0	0	0	0	0	0	0	0	0	0	0	0	0	0	0	0	0	0.1234	0	0	0	0	0	0	0	0	0	0	0.1381	0	0	0	0	0	0	0	0.4819	0	0	0	0	0	0	0	0	0
2.056	240.231	0	0	0	0	0	0	0	0	0.1414	0.924	0.6597	1.0794	1.2569	1.2135	0	1.1441	0.2133	0.1064	1.2907	0	1.184	1.2347	1.4655	0	1.0601	0	0	0	1.4201	1.1485	0.1554	0	0.5034	0.4325	0.7755	0.7771	0.8301	1.3558	0	1.0324	1.8459	1.1433	0	1.9125	0.9856	1.5096	0	0.5392
1.2539	240.231	0	0	0	0	0	0	0	0	0	0	0	0	0	0	0	0	0	0	0	0	0	0	0	0	0	0	0	0.0743	0	0	0.1722	0	0	0	0	0	0	0	0	0	0	0	0	0	0	0	0	0
1.613	240.232	0	0	0	0	0	0	0	0	0	0	0.2188	0	0	0.4705	0.0632	0.5554	0.3741	0	0	0.0999	0	0	0	0	0	0.4081	0	0	0.4267	0	0.1579	0	0	0	0	0	0.4922	0	0	0	0	0.2345	0	0.4606	0	0	0.4378	0
0.8482	240.232	0	0	53.8155	61.6653	48.8311	0	0	0	0	0	0	0	0	0	0	0	0	0	0	0	0	0	0	0	0	0	0	0	0	0	0	0	0	0	0	0	0.6822	0	0	0	0	0	0	0	0	0	0	0
2.2368	240.235	0	0	0	0	0	0	0	0	0	0	0	0	0	0	0	0	0	0	0	0	0.145	0	0	0	0	0	0	0	0	0	0	0	0	0	0	0.133	0	0	0	0	0	0	0	0	0	0	0	0
3.0723	240.987	0	0	0	0	0	0	0.7036	0	0.3814	0.3943	0.37	0.4406	0.3586	0.4415	0.4327	0.4722	0.4655	0.2607	0.2554	0.5988	0.6814	0.5429	0	0	0.6977	0.8143	0.5907	1.1386	0.4652	0.8918	0.2328	0.7561	0.704	0.5249	0.2008	0.5385	0.6085	0.2174	0.3824	0.5146	0	0.4185	0.3079	0.3587	0	0	0	0.3749
1.1338	241.043	0	0	0	0	0	0	0	0	0.3256	0.2945	0.3081	0.358	0.3164	0.3483	0.3414	0.2927	0.7065	0	0	0.1228	0	1.0319	0	0	0	0.9773	1.0864	0.624	1.2582	0	0.6112	0.6239	0.8741	0.3501	0	0.5276	0.4015	0	0.2144	0	0.1932	0.5613	0.1004	0.2982	0	0	0	0.1625
0.88	241.083	0	0	0	0	0	0	0	0	2.274	2.1918	2.1095	2.1372	1.9794	2.1813	2.1185	2.0634	7.3768	1.0251	1.8659	2.0803	0.6609	6.4206	0.6386	2.4185	2.8528	2.5418	1.2809	3.8681	2.1758	1.0955	1.4182	0.6883	2.1414	1.7487	0.4	8.2863	7.5078	0.6824	2.3536	4.4907	2.0525	2.5314	1.0768	2.2918	0.6228	1.0838	0.7986	1.2465
0.6112	241.083	0	0	0	0	0	0	0	0	0	0	0	0	0	0	0	0	0	0	0	0	0	0.1274	0	0	0.3668	0.3552	0	0	0	0	0	0.3342	0	0	0	0	0	0	0	0.2097	0	0	0	0	0	0	0	0
2.2997	241.093	0	0	0	0	0	0	0	0	0	0	0	0	0	0	0	0	0	0	0	0.1489	0	0	0	0	0	0	0	0	0	0	0	0	0	0	0	0	0	0	0	0	0	0	0	0	0	0	0	0
0.5689	402.245	0	0	0	0	0	0	0	0	0	0	0	0	0	0	0	0	0	0	0	0	0	0	0	0	0	0	0	0.3957	0	1.9722	0	0	0	0.1419	0	0	0	0	0	0	0	0	0	0	0	0	0	0
2.4185	402.284	0	0	0	0	0	0	0	0	0	0	0.8731	0.8133	0	0.7855	0	0	0.2854	2.3165	0.8295	0.5451	0	0	0	0	0	2.3856	0.9704	0.8487	0.792	2.6508	0	0	1.4657	0	0	1.3529	0	0	0	2.9704	2.417	1.2931	0	0	0	0	0	0
2.2084	402.284	0	0	0	0	0	0	0	0	2.2846	2.2133	2.1516	2.9468	2.2726	2.2336	2.3674	2.3747	2.3883	3.5454	1.1641	1.4971	3.6033	7.4091	0	0.8074	6.3638	3.6076	3.164	2.6719	2.3306	3.8382	2.1865	3.6894	2.3125	4.2415	4.0501	6.7049	6.485	2.3511	3.0384	6.5826	2.665	3.4895	3.0306	1.6647	0	0.62	0	2.1154
0.8313	402.299	0	0	0	0	0	0	0	0	0	0	0	0	0	0	0	0	0	0	0	0	0	0	0	0	0.1509	0	0	0.5941	0	0.1616	0.1345	0.0854	0	0	0	0	0	0	0	0	0	0	0	0	0	0	0	0
0.9279	403.089	0	0	0	0	0	0	0	0	0	0	0	0	0	0	0	0	0	0	0	0	0	0	0	0	0	0	0	0	0.1577	0	0	0.1496	0	0.064	0	0	0	0	0	0	0	0	0	0	0	0	0	0
3.3038	403.172	0	0	0	0	0	0	0	0	0	0	0	0	0	0.4522	0	0	0	0	0	0	0	0	0.1445	0.1469	0.2012	0	0.1705	0.2167	0	0	0	0	0	0.0145	0	0	0	0	0.2563	0.3439	0.6519	0	0	0	0	0	0.4545	0
0.935	403.179	0	0	0	0	0	0	0	0	0	0	0	0	0	0	0	0	0	0	0	0	0	0	0	0	0	0	0.1565	0	0	0	0	0	0.2582	0	0	0	0	0	0	0	0	0	0	0	0	0	0	0
0.6547	403.229	0	0	0	0	0	0	0	0	0	0	0	0	0	0	0	0	0	0	0	0	0	0	0	0	0.1514	0	0	0.1986	0.2412	0	0	0.1225	0	0	0	0	0	0	0	0.1877	0	0	0.1011	0	0	0	0	0
2.6533	404.299	0	0	0	0	0	0	0	0	0	0	0	0	0	0	0	0	0	0.2526	0	0	0	0.5128	0	0	0.4003	0	0.1135	0	0	0	0	0.194	0.2187	0.1733	0.1781	0.8363	0	0	0	0	0	0.207	0.1426	0	0	0	0	0.0003
0.4508	404.337	0	0	0	0	0	0	0	0	0	0.1198	0.1074	0.1417	0.1161	0.144	0.155	0.1657	0	0	0	0	0	0	0	0	0	0.0711	0	0	0	0	0	0	0	0.0872	0	0	0	0	0	0	0	0	0	0.1255	0.2637	0	0.4585	0
0.4393	405.038	0	0	0	0	0	0	0	0	0	0	0	0	0	0	0	0	0	0	0	0	0	0	0	0	0	0	0	0	0	0	0	0.0092	0	0	0	0	0	0.0819	0	0	0	0.0982	0	0	0	0.1219	0	0
0.8965	405.163	0	0	0	0	0	0	0	0	0	0	0	0	0	0	0	0	0	0	0	0	0	0	0	0	0	0	0.1334	0	0	0	0.1069	0	0	0	0	0	0	0	0	0	0	0	0	0	0	0	0	0
1.2244	405.209	0	0	0	0	0	0	0	0	0	0	0	0	0	0	0	0	0	0	0	0	0	0	0	0	0	0	0	0	0.2717	0	0.2697	0	0	0	0	0	0	0	0	0	0	0	0	0	0	0	0	0
0.5967	405.262	0	0	0	0	0	0	0	0	0.1267	0	0.1124	0.1925	0.1494	0.1515	0.118	0	0.164	0	0.2724	0.1033	0.2366	0.3117	0	0	0.2493	0.1027	0	0.1368	0.2589	0	0	0.1811	0.1837	0.0915	0.2125	0.2635	0.3008	0.1823	0	0.3353	0	0	0	0	0	0	0	0.3328
1.4399	406.104	0	0	0	0	0	0	0	0	0	0	0	0.1029	0	0	0.1275	0	0	0	0	0	0	0	0	0	0	0	2.5491	0	0	0	0	0.5015	0	0.0696	0	0	0	0	0	0	0	0	0.1294	0	0	0	0	0
2.6081	406.174	0	0	0	0	0	0	0	0	0	0	0	0	0	0	0	0	0	0	0	0	0	0	0	0	0	0	0.1123	0	0	0	0	0.2139	0	0	0	0	0	0	0	0	0	0	0	0	0	0	0	0
3.1378	1103.13	0	0	0	0	0	0	0	0	0	0	0	0	0	0	0.0409	0	0	0	0.0101	0	0	0.1009	0	0	0	0.0078	0	0	0	0.0018	0	0	0.086	0	0	0	0	0.1042	0.0528	0	0	0	0.0059	0	0	0	0	0
0.5578	1103.23	0	0	0	0	0	0	0	0	0	0	0	0	0	0	0	0	0	0	0	0	0	0	0	0	0	0	0	0	0	0	0	0	0	0	0	0	0	0	0	0	0	0	0.0451	0	0	0	0	0
3.1332	1103.8	0	0	0	0	0	0.0226	0	0	0	0	0	0	0	0.1017	0	0	0.0064	0	0.1579	0	0	0.1966	0	0	0.08	0.0702	0	0.1225	0	0	0.0629	0.0901	0.1259	0.062	0.1385	0	0	0.1161	0.084	0.0412	0	0	0	0	0	0	0	0
0.5022	1104.19	0	0	0	0	0	0	0	0	0	0	0	0	0	0	0	0	0	0	0	0.0947	0	0	0	0	0	0	0	0	0	0	0.285	0.1053	0	0	0	0	0	0	0	0	0	0	0.0481	0	0	0	0	0
3.1178	1104.47	0	0	0.343	0	0	0	0	0	0.2416	0.1963	0.231	0.141	0.1337	0.2247	0.1771	0.1244	0.1296	0.2121	0.2745	0.126	0.1789	0.4427	0.283	0.2334	0.2001	0.1715	0.0874	0.1913	0.2056	0.031	0.1015	0.1575	0.0385	0.2087	0.1683	0.2366	0.2251	0.1045	0.1598	0.1141	0	0.1768	0	0.2707	0.2098	0.098	0	0.2892
3.1296	1106.47	0	0	0	0	0	0	0	0	0.1585	0.0953	0	0.0354	0	0	0	0	0	0	0.0241	0.019	0	0.1698	0.1456	0	0	0	0	0	0.1208	0	0.0471	0	0	0	0	0	0	0	0.0325	0	0	0	0	0	0	0	0	0.1593
0.5485	1108.7	0	0	0	0	0	0	0	0	0	0	0	0	0	0	0	0	0	0	0	0	0	0	0	0	0	0	0	0	0	0	0.0619	0.0273	0	0	0	0	0	0	0	0	0	0	0.0549	0	0	0	0	0
0.5441	1109.21	0	0	0	0	0	0	0	0	0	0	0	0	0	0	0	0	0	0	0	0	0	0	0	0	0	0	0	0	0	0	0.0408	0.0326	0	0	0	0	0	0	0	0	0	0	0.0531	0	0	0	0	0
2.0696	1109.59	0	0	0	0	0	0	0	0	0	0	0	0	0	0	0	0	0.0891	0.083	0.1718	0.104	0.145	0.15	0	0	0	0	0	0	0	0	0.0513	0	0	0	0	0	0	0.1194	0	0.2137	0	0.0858	0	0	0	0	0	0
2.0601	1110.58	0	0	0	0	0	0	0	0	0	0.2776	0.1216	0.1505	0	0.1477	0	0.2077	0.1921	0.1471	0	0	0	0.319	0.1299	0.3551	0.1694	0.1713	0	0.3033	0.2284	0	0.0547	0	0.1838	0.0449	0.0814	0.0809	0.4864	0.0704	0.1017	0.4306	0.1624	0	0	0.3315	0	0.1595	0	0.313
0.5108	1111.17	0	0	0	0	0	0	0	0	0	0	0	0	0	0	0	0	0	0	0	0	0	0	0	0	0	0	0	0	0	0	0.0438	0	0	0	0	0	0	0	0	0	0	0	0	0	0	0	0	0
2.0583	1111.58	0	0	0	0	0	0	0	0	0.2237	0.2217	0.3463	0.2765	0.4225	0.2357	0.3279	0.1862	0.4594	0.435	0.4107	0.5862	0.1191	0.6218	0.2146	0.5026	0.3647	0.4385	0	0.3229	0.2161	0.228	0.2321	0.0783	0.1565	0.1842	0.204	0.1607	0.5988	0.3244	0.2898	0.5168	0.2438	0.249	0.0492	0.7145	0.2466	0.2644	0.7408	0.3651
2.0544	1112.58	0	0	0	0	0	0	0	0	0	0.5028	0.3754	0.5132	0.0939	0.5602	0.235	0.4265	0.1847	0.3006	0.677	0.7157	0.9067	0.2667	0.2227	0.4513	0	0.4229	0.048	0.3925	0.6533	0	0.0348	0	0.2633	0.1332	0.235	0	0.7003	0.4432	0.4409	0	0.7411	0.2517	0.1062	0.5138	0	0	0.719	0.8976
0.4999	1113.23	0	0	0	0	0	0	0	0	0	0	0	0	0	0	0	0	0	0	0	0	0	0	0	0	0	0.057	0	0	0	0	0.0447	0	0	0	0	0	0	0	0	0	0	0	0	0	0	0	0	0
3.1142	1113.48	0	0	0	0	0	0	0	0	0	0.0406	0	0	0.0877	0	0.0454	0	0	0.0355	0	0.0622	0	0.0597	0.1116	0	0.0449	0.082	0.037	0	0	0	0.0129	0	0	0	0.0389	0.0238	0	0.1434	0.0663	0	0	0	0	0.099	0	0	0	0.0553
2.0579	1113.58	0	0	0	0	0	0	0	0	0.3807	0.2958	0.5034	0.4415	0	0.1759	0.1568	0.0869	0.6073	0.594	0.939	0.376	0.6093	0.3126	0.1265	0.6443	0.4597	0	0.0402	1.1324	0.7407	0.559	0	0.1181	0.2171	0	0.3148	0.697	0.9823	0.5304	0.1209	0.8496	0	0.4734	0.1621	0.1226	0.7383	0.406	1.1285	0.3097
3.1538	53.2226	0.1316	0	0	0	0	0	0.3623	0	0	0	0	0	0	0	0	0	0	0	0	0	0	0	0	0	0	0	0	0	0	0	0.0521	0.1103	0	0	0.0371	0	0	0	0	0	0	0	0	0	0	0	0	0
3.1314	53.268	0	0	0	0	0	0	0	0	0	0	0	0.0496	0	0.0557	0	0.065	0	0	0	0	0.0481	0.1471	0	0	0	0	0	0	0.0931	0	0	0	0	0	0	0	0	0	0.0846	0	0	0	0.0282	0	0.0794	0	0	0.0503
3.1388	53.3422	0	0	0	0	0	0	0	0	0	0	0	0	0	0	0	0	0	0	0	0	0	0	0	0	0	0	0	0	0.1109	0	0	0.0943	0	0	0.0904	0	0	0.1335	0	0	0	0	0	0	0	0	0	0
0.5517	54.9408	0	0	0	0	0	0	0	0	0	0	0	0	0	0	0	0	0	0	0	0	0	0	0	0	0	0	0	0	0	0	0.0584	0.027	0	0	0	0	0	0	0	0	0	0	0	0	0	0	0	0
3.1477	55.2078	0.1881	0.0687	0	0.0811	0	0	0.0771	0	0	0	0	0	0	0	0	0	0	0	0	0	0	0	0	0	0	0	0	0	0	0	0	0	0	0	0.0831	0	0	0.1092	0.0879	0	0	0	0	0	0	0	0	0
3.1512	55.4055	0	0	0	0	0	0	0	0	0	0	0	0	0	0	0	0	0	0	0	0	0	0.1184	0	0	0	0	0	0	0	0	0	0.0972	0	0	0	0	0	0	0	0.0055	0	0	0	0	0	0	0	0
2.0602	55.5179	0	0	0	0	0	0	0	0	0	0	0	0	0	0	0	0	0	0	0	0.1021	0.1199	0	0	0	0	0	0	0	0	0	0	0	0	0	0	0	0	0	0	0	0	0	0	0	0	0	0	0
3.1418	55.5265	0	0	0	0	0	0	0	0	0	0	0	0	0	0	0	0	0	0	0	0	0	0	0	0	0	0	0	0	0	0	0	0	0	0	0.1207	0	0	0.1111	0.076	0	0	0	0	0	0	0	0	0
3.1446	55.5822	0	0	0.2587	0	0	0	0	0	0	0	0	0	0	0	0	0	0	0	0	0	0	0	0	0	0	0	0	0	0	0	0	0	0	0	0.088	0.0636	0	0.0733	0	0	0	0	0	0	0	0	0	0
3.1629	55.6318	0	0	0	0	0	0.3533	0	0	0	0	0	0	0	0	0	0	0	0	0	0	0	0	0	0	0	0	0	0	0	0	0	0.0968	0	0	0	0	0	0	0	0	0	0	0	0	0	0	0	0
2.0661	55.6384	0	0	0	0	0	0	0	0	0	0	0	0	0	0	0	0	0	0	0.1519	0	0.1113	0.1733	0	0	0	0	0	0.1442	0	0	0	0	0	0	0.0718	0	0	0	0	0	0	0	0	0	0	0	0	0
3.1646	55.7117	0	0	0	0	0	0	0	0	0	0	0	0	0	0	0	0	0	0	0	0	0	0	0	0	0	0	0	0	0	0.0125	0	0.091	0	0	0	0	0	0	0	0	0	0	0	0	0	0	0	0
2.07	55.7118	0	0	0	0	0	0	0	0	0	0	0	0	0	0	0	0	0	0.1373	0	0	0	0	0	0	0	0	0	0	0	0	0	0	0	0	0	0	0	0	0	0.2089	0	0	0	0.2511	0	0	0	0
2.0779	55.8201	0	0	0	0	0	0	0	0	0	0	0	0	0	0	0	0	0	0	0	0	0.1319	0	0	0	0	0.0919	0	0	0	0	0	0	0	0	0	0	0	0	0	0	0	0	0	0	0	0	0	0
2.0791	55.8851	0	0	0	0	0	0	0	0	0	0	0	0	0	0	0	0	0	0	0	0	0.1062	0	0	0	0	0	0	0	0	0	0	0	0	0	0	0	0	0	0	0	0	0	0	0	0	0	0	0
2.0618	55.9719	0	0	0	0	0	0	0	0	0	0	0	0	0	0	0	0	0.1474	0.1272	0	0.1249	0	0	0	0	0	0	0	0.124	0	0	0	0	0	0	0	0	0	0.0974	0	0	0	0	0	0	0	0	0	0
2.6684	241.098	0	0	0	0	1.3878	0	0	0	0	0	0	0	0.0012	0	0	0	0.2624	0.3644	0	0	0.4516	0.3712	0	0	0.258	0	0	0.5763	0.2701	0	0	0.0966	0.2387	0.1541	0.002	0	0	0.1826	0	0.3445	0.1806	0	0	0	0.0356	0	0	0.3601
1.8836	241.116	0	0	0	0	0	0	0	0	0	0	0	0	0	0	0	0	0	0	0	0	0	0	0	0	0	0	0	0	0	0.2225	0	0.2459	0	0	0	0	0	0	0	0	0	0	0.1883	0	0	0	0	0
0.4559	241.124	0	0	0	0	0	0	0	0	0	0	0	0	0	0	0	0	0	0	0.1888	0.1974	0.1682	0	0	0	0	0	0	0	0	0	0	0.1546	0.1181	0	0	0	0	0	0	0	0	0	0	0.3333	0.2012	0	0	0
1.5309	241.143	0	0	0	0	0	0	0	0	2.3345	2.2415	2.3817	2.5229	2.2691	2.431	2.4485	2.4924	1.0281	0.9068	1.0319	0.8766	1.3037	1.806	1.1513	2.8576	1.5713	4.3938	3.4441	3.2446	2.6411	2.778	1.7639	1.0495	1.029	1.817	1.3987	2.0451	1.8753	5.4545	2.1986	2.4116	2.6443	6.6221	1.9453	0.9288	2.3113	2.3321	2.0431	2.2255
3.1931	241.145	0	0	0	0	0	1.1441	0	0	0	0	0	0	0.0278	0	0	0	0	0	0	0	0	0	0	0	0	0	0.409	0	0	0	0.0888	0	0	0.0058	0	0	0	0	0	0	0	0	0.0655	0	0	0	0	0
1.7169	241.153	0	0	0	0	0	0	0	0	0	0	0	0	0	0	0	0	0	0	0	0	0.196	0.3296	0	0	0	0.2441	0	0	0	0	0	0	0	0	0.4615	0	0	0	0	0	0	0	0	0	0	0	0	0
1.9829	241.154	0	0	0	0	0	0	0	0	0	0	0	0	0	0	0	0	0	0	0	0	0	0	0	0	0	0	0	0	0	0	0	0	0	0	0	0	0	0	0	0	0	0.341	0	0	0	0	0	0
0.8715	241.171	0	0	0	0	0	0	0	0	0	0	0	0	0	0	0	0	0	0	15.9752	0	0	0	0	0	0	0	0	0	0	0	0	0.0058	0	0	0	0	0	0	0	0	0	0	0	0	0	6.4034	0	0
0.5961	241.187	0	0	0	0	0	0	0	0	0	0	0	0	0	0	0	0	0.4413	0	0	0	0	0	0	0	0.9677	0	0	0	0	0	0	0	0	0	0	0	0	0	0	0	0	0	0	0	0	0	0	0
1.2133	241.189	0	0	0	0	0	0	0	0	0	0	0	0	0	0	0	0	0	0	0	0	0	0	0	0	0	0	0	0	0	0	0.1149	0	0	0	0.1265	0	0	0	0	0	0	0	0	0	0	0	0	0
0.7365	242.012	0	0	0	0	0	0	0	0	0	0.3703	0.366	0.1609	0.1522	0.3393	0.3751	0.3258	1.3629	1.1217	0	0.1253	0.3266	0.2844	0.3701	0	0.7934	0.453	0	0.3297	0.2723	0.596	0.6938	0	0.3163	0.0855	0.8221	0.3597	2.1888	0.3329	0.2559	0.3872	0	0.469	0	0.7649	0.6211	0	0	0.2805
0.5054	242.015	0	0	0	0	0	0	0	0	0	0	0	0	0	0	0	0	0	0	0.5253	0.1018	0	0.3865	0.214	0	0.2016	0.2072	0	0.3429	0.2802	0	0.054	0.0815	0.1912	0	0	0	0	0	0	0.2547	0	0.1357	0	0	0	0	0.2951	0
1.1179	242.037	0	0	0	0	0	0	0	0	0	0	0	0	0	0	0	0	0.3166	0	0.3281	0.333	0.2055	0	0	0	0	0	0	0	0	0	0.4673	0.1571	0.3625	0.5533	0.2361	0.2857	0.4816	0.4079	0.1101	0	0	0	0.3267	0	0.4801	0	0	0
1.5458	242.052	0	0	0	0	0	0	0	0	0	0	0	0	0	0	0	0	0.6806	0.4396	0.3553	0.3079	0	0.421	0	0	0	0	0	0	0	0	0	0.0518	0	0	0	0	1.1194	0	0	0	0	0	0	0	0	0	0	0
1.6513	242.078	0	0	0	0	0	0	0	0	0	0	0	0	0	0	0	0	0	0	0	0	0	0.2114	0	0	0.1067	0	0.1034	0.1588	0.2384	0	0	0.1316	0	0.1566	0.1148	0	0	0	0.1311	0.3451	0	0.1672	0	0	0	0	0	0
2.2987	242.08	0	0	0	0	0	0	0	0	0.4405	0.4503	0.3706	0.4096	0.4608	0.3004	0.3998	0.4204	0.3974	0.7072	0	0.3304	0.2656	0.4805	0.7278	0.3878	0.3997	0.5448	0.2604	0.3308	0	0.5072	0.2024	0.1523	0.3264	0.189	0.3101	0.2912	0.6533	0	0.2559	0.3699	0.3498	0.4024	0.2145	0.5906	0.7437	0.3837	0.6875	0.4776
0.7365	406.187	0	0	0	0	0	0	0	0	0	0.1716	0	0	0	0	0	0	1.0147	0	0	0	0.0793	0	0.2094	0	0	0.1384	0.1409	0.1377	0	0	0.2793	0.1568	0	0	0	0.1567	1.89	0	0	0	0	0.2137	0.0548	0.4459	0	0	0	0
1.4404	406.196	0	0	0	0	0	0	0	0	0	0	0	0	0	0	0	0	0	0	0	0.1235	0	0.3235	0	0	0	0.1879	0	0	0	0	0.0785	0	0	0.0969	0	0	0	0	0	0	0	0	0	0	0	0	0	0
0.9725	407.097	0	0	0	0	0	0	0	0	0	0	0	0	0	0	0	0	0	0	0	0	0	0	0	0	0.2748	0	0	0	0	0	0	0	0	0	0	0	0.4061	0	0	0	0	0	0	0	0	0	0	0
3.4528	407.107	0.2711	0	0	0	0	0	0	0	0	0.3938	0	0.1113	0.2796	0.3425	0.3089	0.3669	0.1173	0	0.0025	0.0489	0	0	0.057	0	0.0604	0	0.167	0	0.2698	0	0	0	0	0.0196	0	0	0	0.359	0	0.4001	0	0.0611	0	0.2518	0.8709	0	1.6682	1.1766
2.45	407.186	0	0	0	0	0	0	0	0	0	0	0	0	0	0	0	0	0	0	0	0	0.2285	0	0	0	0.1759	0	0.152	0.1484	0	0	0	0.1664	0.1917	0	0	0.1856	0	0	0	0	0	0.1191	0.1063	0	0	0	0	0
2.2785	407.189	0	0	0	0	0	0	0	0	7.5742	7.1005	7.3104	7.4807	7.2653	7.6311	7.6855	7.6524	10.2714	2.7063	3.1167	6.6451	27.0741	6.1533	2.144	3.3875	15.0924	21.0911	15.6413	11.6099	11.5498	37.7822	4.4991	14.3704	17.449	11.1324	2.9906	11.5796	13.9498	3.1707	4.2655	9.1149	1.6911	15.5915	8.6481	1.065	0.656	0.7603	1.9684	14.2297
0.9955	407.197	0	0	0	0	0	0	0	0	0	0	0	0	0	0	0	0	0	0	0	0	0.4491	0.2973	0	0	0	0.3982	0	0	0	0	0.0882	0.0118	0	0	0	0	0.339	0	0	0.4087	0	0	0	0	0	0	0	0
0.6753	407.255	0	0	0	0	0	0	0	0	0	0	0	0	0	0	0	0	0.2476	0	0	0	0	0.2827	0	0	0.1263	0.1723	0	0.1784	0	0	0	0.0777	0.4518	0	0	0	0	0.1269	0	0	0	0.2181	0	0	0	0	0	0
0.4482	407.336	0	0	0	0	0	0	0	0	0	0	0	0	0	0	0	0	0	0	0	0	0	0	0	0	0	0	0	0	0	0.477	0	0	0	0	0	0	0	0	0	0	0	0	0	0	0	0	0	0
3.0617	407.953	0	0	0	0	0	0	0	0	0	0	0.0574	0.0202	0	0	0	0	0	0	0	0	0	0	0	0	0	0	0.1091	0.0864	0	0.0214	0.0648	0	0.0766	0.0224	0	0.0197	0	0.4593	0.0204	0	0	0.0559	0	0	0	0	0	0
0.841	408.048	0	0	0	0	0	0	0	0	0.1445	0	0.2044	0.1635	0.1853	0.1412	0.1929	0.1585	0	0.1302	0.2156	0.1817	0.1287	1.6452	0.1542	0.1873	0	0.142	0.244	0.4023	0	0.3221	0.16	0.4081	0	0.1892	0.4225	0.0887	0	0.1489	0.0931	0.1446	0.4085	0.6801	0.1428	0	0	0.2201	0	0.1506
0.7815	408.12	0	0	0	0	0	0	0	0	0	0	0	0	0	0	0	0	0	0	0	0	0	0	0	0	0	0	0.1987	0	0	0	0	0.1928	0	0	0	0	0	0	0	0	0	0	0	0	0	0	0	0
0.4358	409.061	0	0	0	0	0	0	0	0	0	0	0	0	0	0	0	0	0	0	0	0	0	0	0	0	0	0	0	0	0	0	0	0	0	0	0	0	0	0	0	0	0	0	0	0.1846	0	0	0	0
1.0798	409.08	0	0	0	0	0	0	0	0	0.5054	0.4938	0	0	0	0	0	0	0	0.5075	0	1.5731	0	0	0	0	0	0	0	0.2897	0	0	1.7098	0.9281	0.1006	1.0844	0.9394	0	0	0	1.2169	0	0	0	0.7005	0	0	0	0	0
1.2103	409.086	0	0	0	0	0	0	0	0	0	0	0	0	0	0	0	0	0	0.209	0	0.5521	0	0	0	0	0	0	0	0	0	0	0.5504	0.1166	0.2141	0.0852	0.3126	0	0	0	0.0203	0	0	0	0.1813	0	0	0	0	0
0.6763	409.092	0	0	0	0	0	0	0	0	0.2567	0.2243	0.1629	0.2235	0.201	0.1802	0.1745	0	0.3458	0	0	0.3006	0	0.6942	0.2578	0.1433	0.1184	0	0.2892	0.187	0.3024	0	0.076	0.0272	0	0.159	0	0	0	0	0.1907	0.2348	0	0.1605	0.27	0.5014	0	0.1692	0.3247	0.2526
3.1174	1114.48	0.2902	0	0	0.0598	0.1186	0	0	0	0.2774	0.4657	1.0519	0.6813	0.4468	0.3189	1.1129	0.3137	0.6422	0.9751	0.3951	0.2895	0.1008	0.7056	0.8862	0.3837	0.2306	0.2104	0.4616	0.8386	0.5995	0.254	0.1651	0.202	0.3049	0.4345	0.1057	0.4634	1.3439	0.633	0.2696	0.6276	0.7423	0.2511	0.2401	1.7248	1.7102	0.9073	0.8247	0.4738
2.0594	1114.58	0	0	0	0	0	0	0	0	0.1604	0.2656	0.4648	0.1744	0	0.5859	0	0.7795	0.4448	0	0.4825	0	0.6386	0	0.254	1.095	0.6664	0.1789	0.0539	0.0973	0.5354	0	0	0	0.4075	0.246	0.079	0.6668	0.5228	0	0.508	0	1.2825	0.198	0	0	0	0.228	0.9932	0.112
0.571	1115.25	0	0	0	0	0	0	0	0	0	0	0	0	0	0	0	0	0	0	0	0	0	0	0	0	0	0	0	0	0	0	0.0392	0	0	0	0	0	0	0	0	0	0	0	0	0	0	0	0	0
2.0648	1115.58	0	0	0	0	0	0	0	0	0	0	0	0	0	0	0	0.7045	0	0	0	0	0	1.2281	0	0	0	0	0	0	0	0	0.2077	0	0	0	0	0	0	0	0	0	0	0	0	0.7046	0	0.4564	0	0
3.1147	1116.48	0	0	0.4155	0	0	0	0	0	0.5195	0	0.291	0.5	0.0548	0.762	0	0.1707	0.2804	0.3607	0.5626	0.2591	0.5112	1.0074	1.1325	0	0.2598	0.3733	0.4074	0	0.8035	0.221	0	0.3144	0	0.08	0.0467	0.077	0	0.2658	0.0844	0.3872	0.8036	0	0	1.3189	0.8539	0	0	0.2628
[truncated: 8,816 more rows]
[truncated: 22 more columns]

## Sheet: RP osmolality
Sample name		22072021 Proteos QC osmolarity 1	22072021 Proteos QC osmolarity 2	22072021 Proteos QC osmolarity 3	22072021 Proteos QC osmolarity 4	22072021 Proteos QC osmolarity 5	22072021 Proteos QC osmolarity 6	22072021 Proteos blanc 1	22072021 Proteos blanc 2	22072021 Proteos blanc 3	22072021 Proteos blanc 4	22072021 Proteos blanc 5	22072021 Proteos blanc 6	22072021 Proteos 3 U1 osmolarity	22072021 Proteos 4 U1 osmolarity	22072021 Proteos 5 U1 osmolarity	22072021 Proteos 6 U1 osmolarity	22072021 Proteos 7 U1 osmolarity	22072021 Proteos 8 U1 osmolarity	22072021 Proteos 9 U1 osmolarity	22072021 Proteos 10 U1 osmolarity	22072021 Proteos 11 U1 osmolarity	22072021 Proteos 12 U1 osmolarity	22072021 Proteos 13 U1 osmolarity	22072021 Proteos 14 U1 osmolarity	22072021 Proteos 15 U1 osmolarity	22072021 Proteos 16 U1 osmolarity	22072021 Proteos 17 U1 osmolarity	22072021 Proteos 18 U1 osmolarity	22072021 Proteos 19 U1 osmolarity	22072021 Proteos 20 U1 osmolarity	22072021 Proteos 21 U1 osmolarity	22072021 Proteos 22 U1 osmolarity	22072021 Proteos 23 U1 osmolarity	22072021 Proteos 24 U1 osmolarity	22072021 Proteos 25 U1 osmolarity	22072021 Proteos 26 U1 osmolarity	22072021 Proteos 27 U1 osmolarity	22072021 Proteos 28 U1 osmolarity	22072021 Proteos 29 U1 osmolarity	22072021 Proteos 3 U2 osmolarity	22072021 Proteos 4 U2 osmolarity	22072021 Proteos 5 U2 osmolarity	22072021 Proteos 6 U2 osmolarity	22072021 Proteos 7 U2 osmolarity	22072021 Proteos 8 U2 osmolarity	22072021 Proteos 9 U2 osmolarity	22072021 Proteos 10 U2 osmolarity	22072021 Proteos 11 U2 osmolarity
[truncated: 1,121 more rows]
[truncated: 17 more columns]

[truncated: 1 more sheets: RP no osmolality]
